# Supplementary material for: Water oxidation by Brønsted acid-catalyzedin situgenerated thiol cation: dual function of the acid catalyst leading to transition metal-free substitution and addition reactions of S–S bonds
Source: Royal Society of Chemistry journal article supplement (doi:10.1039/d2qo00169a), 2022-01-01

Electronic Supplementary Information

**Water Oxidation by Brønsted Acid-Catalyzed *in situ* Generated  
Thiol Cation: Dual Function of the Acid Catalyst Leading to  
Transition Metal-Free Substitution and Addition Reactions of S-S  
Bonds**

Xiantao Ma,<sup>\*a</sup> Yingying Zhu,<sup>a</sup> Jing Yu,<sup>a</sup> Ran Yan,<sup>a</sup> Xiaoni Xie,<sup>a</sup> Lijun Huang,<sup>a</sup> Qi Wang,<sup>b</sup>  
Xue-Ping Chang<sup>\*a</sup> and Qing Xu<sup>\*b,c</sup>

<sup>a</sup> *College of Chemistry and Chemical Engineering, Green Catalysis & Synthesis Key Laboratory of Xinyang City, Xinyang Normal University, Xinyang, Henan 464000, China*

<sup>b</sup> *School of Chemistry and Chemical Engineering, Yangzhou University, Yangzhou, Jiangsu 225002, China*

<sup>c</sup> *College of Chemistry and Materials Engineering, Wenzhou University, Wenzhou, Zhejiang 325035, China*

*Emails: xiantaoma@126.com; xuepingchang@xynu.edu.cn; qing-xu@wzu.edu.cn*

**Table of contents**

|                                                                                               |            |
|-----------------------------------------------------------------------------------------------|------------|
| <b>1. Experimental.....</b>                                                                   | <b>S2</b>  |
| <b>2. Typical Procedure and Characterization of the Products.....</b>                         | <b>S2</b>  |
| <b>3. Control Reactions for Mechanistic Studies.....</b>                                      | <b>S18</b> |
| <b>4. Density Functional Theory (DFT) Calculation Studies.....</b>                            | <b>S38</b> |
| <b>5. Copies of the <sup>1</sup>H, <sup>13</sup>C NMR and IR Spectra of the Products.....</b> | <b>S62</b> |

## 1. Experimental

**General.** Unless otherwise noted, all chemicals were purchased and used without further purification. Unless otherwise specified, all reactions were carried out in sealed Schlenk tubes under air and then monitored by TLC and/or GC-MS. All products were purified by column chromatography on silica gel using petroleum ether and ethyl acetate as the eluent. Unless otherwise noted,  $^1\text{H}$  and  $^{13}\text{C}$  NMR spectra were measured on a JNM-ECZ600R/S3 (Jeol, Japan) (600 and 150 MHz for  $^1\text{H}$  and  $^{13}\text{C}$  NMR, respectively) using  $\text{CDCl}_3$  as the solvent. Chemical shifts for  $^1\text{H}$  and  $^{13}\text{C}$  NMR were referred to internal  $\text{Me}_4\text{Si}$  (0 ppm) as the standard. Mass spectra were measured on an Agilent GC-MS-7890A/5975C Plus spectrometer (EI). HRMS were recorded on a LC-TOF spectrometer (Xevo G2-XS QToF) using ESI or EI techniques. Infrared spectra were measured on an Infrared spectroscopy combined with infrared microscopy (Thermo Fisher Nicoletis5). Geometry optimizations and single-point energies calculations in the ground state were using density functional theory (DFT) method with the B3LYP exchange-correlation functional in combination with the all-electron 6-31G\* basis set. The nature of all stationary points was confirmed by harmonic vibrational frequency analysis. Grimme-type dispersion corrections (D3) were included throughout. Gibbs free energies of all optimized structures were calculated at 298.15 K and 1 atm. All DFT calculations were carried out using the GAUSSIAN09 package.

## 2. Typical Procedure and Characterization of the Products

**Typical procedure for the Brønsted acid-catalyzed reaction of disulfides and alcohols.** The mixture of di(pyridin-2-yl)disulfide **1a** (82.5 mg, 0.375 mmol), benzyl alcohol **2a** (54.0 mg, 0.50 mmol, 1.0 equiv.), and  $\text{KHSO}_4$  (17.0 mg, 0.125 mmol, 25 mol%) was directly sealed in a Schlenk tube (10 mL) under air and stirred at 130 °C for 12 h. The reaction mixture was then analyzed by TLC/GC-MS and purified by flash column chromatography on silica gel using ethyl acetate and petroleum ether (0~ 1/20) as the eluent, giving **3aa** in 86% isolated yield.

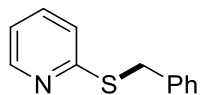

**2-(Benzylthio)pyridine (3aa).** Colorless oil.  $^1\text{H}$  NMR (600 MHz,  $\text{CDCl}_3$ )  $\delta$  8.45 (d,  $J$  = 4.8 Hz, 1H), 7.48 – 7.44 (m, 1H), 7.40 (d,  $J$  = 7.2 Hz, 2H), 7.29 (dd,  $J$  = 9.6, 4.8 Hz, 2H), 7.23 (dd,  $J$  = 9.6, 4.8 Hz, 1H), 7.15 (d,  $J$  = 8.4 Hz, 1H), 7.00 – 6.95 (m, 1H), 4.43 (s, 2H);  $^{13}\text{C}$  NMR (150 MHz,  $\text{CDCl}_3$ )  $\delta$  158.9, 149.5, 138.0, 136.1, 129.1, 128.6, 127.2, 122.2, 119.7, 34.5. This compound was known: Jia, X.; Yu, L.; Liu, J.; Xu, Q.; Sickert, M.; Chen, L.; Lautens, M. *Green Chem.* **2014**, *16*, 3444.

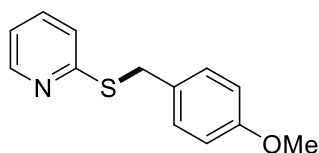

**2-((4-Methoxybenzyl)thio)pyridine (3ab).** Colorless oil.  $^1\text{H}$  NMR (600 MHz,  $\text{CDCl}_3$ )  $\delta$  8.45 (d,  $J = 4.8$  Hz, 1H), 7.47 – 7.44 (m, 1H), 7.33 – 7.31 (m, 2H), 7.14 (dd,  $J = 4.2, 4.2$  Hz, 1H), 7.00 – 6.95 (m, 1H), 6.83 – 6.80 (m, 2H), 4.38 (s, 2H), 3.77 (s, 3H);  $^{13}\text{C}$  NMR (150 MHz,  $\text{CDCl}_3$ )  $\delta$  159.1, 158.8, 149.5, 136.1, 130.2, 129.9, 122.2, 119.6, 114.0, 55.4, 34.1. This compound was known: Han, X.; Wu, J. *Org. Lett.* **2010**, *12*, 5780.

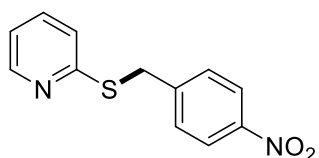

**2-((4-Nitrobenzyl)thio)pyridine (3ac).** Brown solid, m.p. 84 – 85 °C.  $^1\text{H}$  NMR (600 MHz,  $\text{CDCl}_3$ )  $\delta$  8.42 (dd,  $J = 6.0, 1.8$  Hz, 1H), 8.14 – 8.09 (m, 2H), 7.56 (dd,  $J = 9.0, 1.8$  Hz, 2H), 7.49 – 7.44 (m, 1H), 7.16 – 7.12 (m, 1H), 7.02 – 6.97 (m, 1H), 4.49 (s, 2H);  $^{13}\text{C}$  NMR (150 MHz,  $\text{CDCl}_3$ )  $\delta$  157.2, 149.5, 147.0, 146.7, 136.3, 129.9, 123.7, 122.5, 120.2, 33.4. This compound was known: Goriya, Y.; Ramana, C. V. *Tetrahedron* **2010**, *66*, 7642.

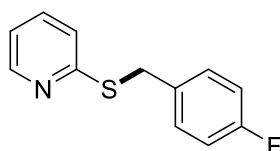

**2-((4-Fluorobenzyl)thio)pyridine (3ad).** Colorless oil.  $^1\text{H}$  NMR (600 MHz,  $\text{CDCl}_3$ )  $\delta$  8.46 – 8.43 (m, 1H), 7.47 – 7.43 (m, 1H), 7.39 – 7.34 (m, 2H), 7.14 (d,  $J = 8.4$  Hz, 1H), 7.00 – 6.94 (m, 3H), 4.40 (s, 2H);  $^{13}\text{C}$  NMR (150 MHz,  $\text{CDCl}_3$ )  $\delta$  162.0 (d,  $J = 245.2$  Hz), 158.5, 149.5, 136.1, 134.0 (d,  $J = 2.5$  Hz), 130.6 (d,  $J = 8.2$  Hz), 122.3, 119.8, 115.4 (d,  $J = 21.4$  Hz), 33.6. This compound was known: Dean, W. M.; Šiaučiulis, M.; Storr, T. E.; Lewis, W.; Stockman, R. A. *Angew. Chem. Int. Ed.* **2016**, *55*, 10013.

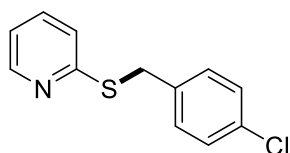

**2-((4-Chlorobenzyl)thio)pyridine (3ae).** Colorless oil.  $^1\text{H}$  NMR (600 MHz,  $\text{CDCl}_3$ )  $\delta$  8.44 (d,  $J = 4.8$  Hz, 1H), 7.44 (dd,  $J = 7.8, 7.8$  Hz, 1H), 7.33 (d,  $J = 8.4$  Hz, 2H), 7.24 (d,  $J = 8.4$  Hz, 2H), 7.13 (d,  $J = 7.8$  Hz, 1H), 6.98 (d,  $J = 6.0$  Hz, 1H), 4.39 (s, 2H);  $^{13}\text{C}$  NMR (150 MHz,  $\text{CDCl}_3$ )  $\delta$

158.3, 149.5, 136.9, 136.1, 132.9, 130.4, 128.7, 122.3, 119.9, 33.6. HRMS (ESI) for C<sub>12</sub>H<sub>11</sub>CINS (M+H) Calcd: 236.0301; found: 236.0285. This compound was known: Tresoldi, G.; Lo Schiavo, S.; Lanza, S.; Cardiano, P. *Eur. J. Inorg. Chem.* 2002, 181.

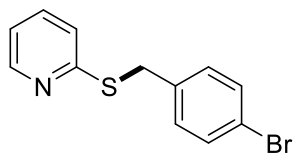

**2-((4-Bromobenzyl)thio)pyridine (3af).** Colorless oil. <sup>1</sup>H NMR (600 MHz, CDCl<sub>3</sub>) δ 8.44 (dd, *J* = 4.8, 1.8 Hz, 1H), 7.48 – 7.43 (m, 1H), 7.40 – 7.38 (m, 2H), 7.29 – 7.26 (m, 2H), 7.13 (dd, *J* = 4.2, 4.2 Hz, 1H), 7.00 – 6.96 (m, 1H), 4.37 (s, 2H); <sup>13</sup>C NMR (150 MHz, CDCl<sub>3</sub>) δ 158.2, 149.5, 137.5, 136.1, 131.6, 130.8, 122.3, 121.0, 119.8, 33.7. This compound was known: Haviv, F.; DeNet, R. W.; Michaels, R. J.; Ratajczyk, J. D.; Carter, G. W.; Young, P. R. *J. Med. Chem.* **1983**, 26, 218.

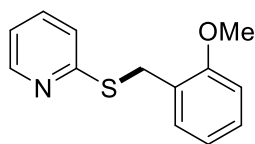

**2-((2-Methoxybenzyl)thio)pyridine (3ag).** Colorless oil. <sup>1</sup>H NMR (600 MHz, CDCl<sub>3</sub>) δ 8.46 (d, *J* = 4.5 Hz, 1H), 7.44– 7.40 (m, 2H), 7.21 (dd, *J* = 7.8, 1.2 Hz, 1H), 7.14 (d, *J* = 8.4 Hz, 1H), 6.97 – 6.94 (m, 1H), 6.88 – 6.85 (m, 2H), 4.47 (s, 2H), 3.85 (s, 3H). <sup>13</sup>C NMR (150 MHz, CDCl<sub>3</sub>) δ 159.6, 157.6, 149.4, 135.9, 130.6, 128.6, 126.3, 122.2, 120.5, 119.4, 110.6, 55.6, 29.1. This compound was known: Pathak, A. K.; Pathak, V.; Seitz, L. E.; Suling, W. J.; Reynolds, R. C. *J. Med. Chem.* **2004**, 47, 1273.

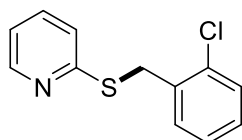

**2-((2-Chlorobenzyl)thio)pyridine (3ah).** Colorless oil. <sup>1</sup>H NMR (600 MHz, CDCl<sub>3</sub>) δ 8.46 (dd, *J* = 4.8, 2.4 Hz, 1H), 7.53 – 7.48 (m, 2H), 7.47 – 7.45 (m, 1H), 7.38 – 7.33 (m, 1H), 7.19 – 7.14 (m, 3H), 6.99 (dd, *J* = 7.8, 4.8 Hz, 1H), 4.56 (s, 2H); <sup>13</sup>C NMR (150 MHz, CDCl<sub>3</sub>) δ 158.4, 149.4, 136.1, 136.0, 134.4, 131.1, 129.6, 128.6, 126.9, 122.4, 119.7, 31.9. This compound was known: Ma, X.; Yu, L.; Su, C.; Yang, Y.; Li, H.; Xu, Q. *Adv. Synth. Catal.* **2017**, 359, 1649.

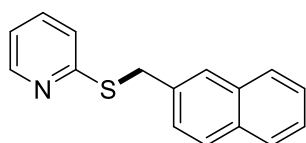

**2-((Naphthalen-1-ylmethyl)thio)pyridine (3ai).** White solid. 124 – 125 °C  $^1\text{H}$  NMR (600 MHz,  $\text{CDCl}_3$ )  $\delta$  8.48 (d,  $J = 4.8$  Hz, 1H), 7.85 (s, 1H), 7.79 (t,  $J = 8.4$  Hz, 3H), 7.53 (dd,  $J = 8.4, 1.2$  Hz, 1H), 7.49 – 7.39 (m, 3H), 7.17 (d,  $J = 8.4$  Hz, 1H), 6.99 (dd,  $J = 7.2, 4.8$  Hz, 1H), 4.60 (s, 2H);  $^{13}\text{C}$  NMR (150 MHz,  $\text{CDCl}_3$ )  $\delta$  158.8, 149.5, 136.1, 135.5, 133.4, 132.7, 128.4, 127.8, 127.7, 127.6, 127.3, 126.2, 125.9, 122.3, 119.8, 34.8. HRMS (ESI) for  $\text{C}_{16}\text{H}_{14}\text{NS}$  (M+H) Calcd: 252.0847; found: 252.0864. Ma, X.; Yu, J.; Yan, R.; Yan, M.; Xu, Q. *J. Org. Chem.* **2019**, *84*, 11294.

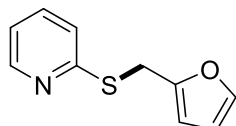

**2-((Furan-2-ylmethyl)thio)pyridine (3aj).** Colorless oil.  $^1\text{H}$  NMR (600 MHz,  $\text{CDCl}_3$ )  $\delta$  8.45 (dd,  $J = 4.8, 1.8$  Hz, 1H), 7.49 – 7.44 (m, 1H), 7.32 (d,  $J = 2.4$  Hz, 1H), 7.17 (dd,  $J = 8.4, 1.2$  Hz, 1H), 7.00 – 6.97 (m, 1H), 6.27 (dd,  $J = 3.0, 1.8$  Hz, 1H), 6.23 (d,  $J = 3.0$  Hz, 1H), 4.47 (s, 2H);  $^{13}\text{C}$  NMR (150 MHz,  $\text{CDCl}_3$ )  $\delta$  158.0, 149.5, 142.1, 136.1, 122.5, 119.8, 110.6, 107.8, 29.8. This compound was known: Dean, W. M.; Šiaučiulis, M.; Storr, T. E.; Lewis, W.; Stockman, R. A. *Angew. Chem. Int. Ed.* **2016**, *55*, 10013.

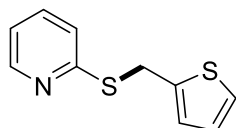

**2-((Thiophen-2-ylmethyl)thio)pyridine (3ak).** Colorless oil.  $^1\text{H}$  NMR (600 MHz,  $\text{CDCl}_3$ )  $\delta$  8.48 (dd,  $J = 4.8, 0.6$  Hz, 1H), 7.53 – 7.44 (m, 1H), 7.20 – 7.11 (m, 2H), 7.01 – 6.96 (m, 1H), 6.89 (dd,  $J = 5.4, 3.6$  Hz, 1H), 4.65 (s, 2H)  $^{13}\text{C}$  NMR (150 MHz,  $\text{CDCl}_3$ )  $\delta$  158.0, 149.3, 141.1, 136.0, 126.6, 126.3, 124.8, 122.3, 119.7, 28.8. This compound was known: Ma, X.; Yu, L.; Su, C.; Yang, Y.; Li, H.; Xu, Q. *Adv. Synth. Catal.* **2017**, *359*, 1649.

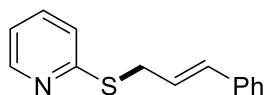

**2-((Cinnamyl)thio)pyridine (3al).** Colorless oil.  $^1\text{H}$  NMR (600 MHz,  $\text{CDCl}_3$ )  $\delta$  8.45 (d,  $J = 4.2$  Hz, 1H), 7.50 – 7.44 (m, 1H), 7.35 – 7.16 (m, 6H), 7.01 – 6.96 (m, 1H), 6.61 (d,  $J = 15.6$  Hz, 1H), 6.33 (dt,  $J = 15.6, 7.2$  Hz, 1H), 4.01 (dd,  $J = 7.2, 1.2$  Hz, 2H);  $^{13}\text{C}$  NMR (150 MHz,  $\text{CDCl}_3$ )  $\delta$  158.6, 149.6, 136.9, 136.1, 132.8, 128.6, 127.6, 126.4, 125.4, 122.5, 119.7, 32.8. This compound was known: Santos, S.; Quignard, F.; Sinou, D.; Choplin, A. *Top. Catal.* **2000**, *13*, 311.

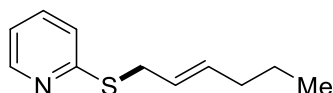

**(E)-2-(Hex-2-en-1-ylthio)pyridine (3am).** Colorless oil.  $^1\text{H}$  NMR (600 MHz,  $\text{CDCl}_3$ )  $\delta$  8.41 (d,  $J = 4.8$  Hz, 1H), 7.49 – 7.42 (m, 1H), 7.15 (d,  $J = 7.2$  Hz, 1H), 6.99 – 6.93 (m, 1H), 5.71 – 5.64 (m, 1H), 5.58 – 5.52 (m, 1H), 3.77 (d,  $J = 7.2$  Hz, 2H), 1.97 (dd,  $J = 14.4, 7.2$  Hz, 2H), 1.34 (dd,  $J = 14.4, 7.2$  Hz, 2H), 0.84 (t,  $J = 7.2$  Hz, 3H);  $^{13}\text{C}$  NMR (150 MHz,  $\text{CDCl}_3$ )  $\delta$  159.2, 149.5, 136.0, 134.4, 125.1, 122.4, 119.5, 34.5, 32.7, 22.4, 13.7. This compound was known: Goux, C.; Lhoste, P.; Sinou, D. *Tetrahedron* **1994**, *50*, 10321.

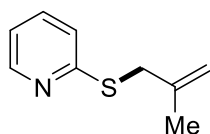

**2-((2-Methylallyl)thio)pyridine (3an).** Colorless oil.  $^1\text{H}$  NMR (600 MHz,  $\text{CDCl}_3$ )  $\delta$  8.41 (d,  $J = 4.8$  Hz, 1H), 7.48 – 7.43 (m, 1H), 7.17 (d,  $J = 7.8$  Hz, 1H), 6.96 (dd,  $J = 7.2, 4.8$  Hz, 1H), 5.01 (s, 1H), 4.85 (s, 1H), 3.84 (s, 2H), 1.84 (s, 3H);  $^{13}\text{C}$  NMR (150 MHz,  $\text{CDCl}_3$ )  $\delta$  159.1, 149.5, 141.4, 136.0, 122.4, 119.6, 113.8, 37.3, 21.6. This compound was known: Galaka, T.; Casal, M. F.; Storey, M.; Li, C.; Chao, M. N.; Szajnman, S. H.; Docampo, R.; Moreno, S. N. J.; Rodriguez, J. B. *Molecules* **2017**, *22*, 82.

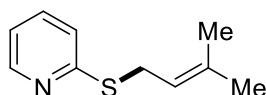

**2-((3-Methylbut-2-en-1-yl)thio)pyridine (3ao).** Colorless oil.  $^1\text{H}$  NMR (600 MHz,  $\text{CDCl}_3$ )  $\delta$  8.41 (d,  $J = 4.8$  Hz, 1H), 7.48 – 7.43 (m, 1H), 7.14 (d,  $J = 7.8$  Hz, 1H), 6.95 (dd,  $J = 7.2, 4.8$  Hz, 1H), 5.35 (t,  $J = 7.8$  Hz, 1H), 3.80 (d,  $J = 7.8$  Hz, 2H), 1.72 (s, 6H);  $^{13}\text{C}$  NMR (150 MHz,  $\text{CDCl}_3$ )  $\delta$  159.1, 149.5, 141.4, 136.0, 122.4, 119.6, 113.8, 28.6, 25.8, 14.2. This compound was known: Goux, C.; Lhoste, P.; Sinou, D. *Tetrahedron*, **1994**, *50*, 10321.

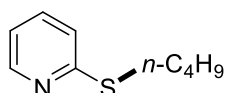

**2-(Butylthio)pyridine (3ap).** Colorless oil.  $^1\text{H}$  NMR (600 MHz,  $\text{CDCl}_3$ )  $\delta$  8.44 – 8.37 (m, 1H), 7.49 – 7.41 (m, 1H), 7.15 (d,  $J = 7.8$  Hz, 1H), 6.97 – 6.91 (m, 1H), 3.15 (t,  $J = 7.2$  Hz, 2H), 1.70 – 1.65 (m, 2H), 1.50 – 1.44 (m, 2H), 0.93 (t,  $J = 7.2$  Hz, 3H);  $^{13}\text{C}$  NMR (150 MHz,  $\text{CDCl}_3$ )  $\delta$  159.7, 149.5, 135.9, 122.2, 119.3, 31.5, 29.9, 22.2, 13.8. This compound was known: Nath, D.; Skilbeck, M. C.; Coldham, I.; Fleming, F. F. *Org. Lett.* **2014**, *16*, 62.

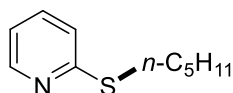

**2-(Pentylthio)pyridine (3aq).** Colorless oil.  $^1\text{H}$  NMR (600 MHz,  $\text{CDCl}_3$ )  $\delta$  8.40 (d,  $J = 4.8$  Hz, 1H), 7.47 – 7.41 (m, 1H), 7.15 (d,  $J = 7.8$  Hz, 1H), 6.98 – 6.90 (m, 1H), 3.14 (t,  $J = 7.8$  Hz, 2H), 1.73 – 1.67 (m, 2H), 1.44 – 1.39 (m, 2H), 1.36 – 1.32 (m, 2H), 0.90 (t,  $J = 7.2$  Hz, 3H);  $^{13}\text{C}$  NMR (150 MHz,  $\text{CDCl}_3$ )  $\delta$  159.7, 149.5, 135.9, 122.2, 119.2, 31.2, 30.2, 29.1, 22.4, 14.1. This compound was known: Xiao, Z.; Wang, L.; Wei, J.; Ran, C.; Liang, S.H.; Shang, J.; Chen, G.-Y.; Zheng, C. *Chem. Commun.* **2020**, 56, 4164.

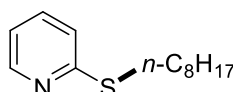

**2-(Octylthio)pyridine (3ar).** Colorless oil.  $^1\text{H}$  NMR (600 MHz,  $\text{CDCl}_3$ )  $\delta$  8.40 (dd,  $J = 4.8$ , 2.4 Hz, 1H), 7.45 (dt,  $J = 7.8$ , 1.8 Hz, 1H), 7.18 – 7.12 (m, 1H), 6.98 – 6.92 (m, 1H), 3.16 – 3.12 (m,  $J$  2H), 1.69 (dt,  $J = 15.0$ , 7.2 Hz, 2H), 1.45 – 1.41 (m, 2H), 1.36 – 1.17 (m, 8H), 0.88 (t,  $J = 7.8$  Hz, 3H);  $^{13}\text{C}$  NMR (150 MHz,  $\text{CDCl}_3$ )  $\delta$  159.7, 149.5, 135.9, 122.2, 119.3, 31.9, 30.2, 29.4, 29.3, 29.1, 22.8, 14.2. This compound was known: Duan, Z.; Ranjit, S.; Zhang, P.; Liu, X. *Chem.–Eur. J.* **2009**, 15, 3666.

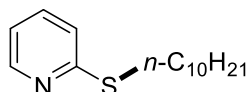

**2-(Decylthio)pyridine (3as).** Colorless oil.  $^1\text{H}$  NMR (600 MHz,  $\text{CDCl}_3$ )  $\delta$  8.40 (dd,  $J = 4.8$ , 1.8 Hz, 1H), 7.48 – 7.42 (m, 1H), 7.15 (d,  $J = 7.8$  Hz, 1H), 6.98 – 6.91 (m, 1H), 3.16 – 3.12 (m, 2H), 1.73 – 1.63 (m, 2H), 1.45 – 1.40 (m, 2H), 1.35 – 1.20 (m, 12H), 0.86 (t,  $J = 6.6$  Hz, 3H);  $^{13}\text{C}$  NMR (150 MHz,  $\text{CDCl}_3$ )  $\delta$  159.7, 149.5, 135.9, 122.2, 119.2, 32.0, 30.2, 29.7, 29.42, 29.39, 29.3, 29.1, 22.8, 14.2. This compound was known: Brussaard, Y.; Olbrich, F.; Schaumann, E. *Inorg. Chem.* **2013**, 52, 13160.

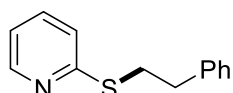

**2-(Phenethylthio)pyridine (3at).** Colorless oil.  $^1\text{H}$  NMR (600 MHz,  $\text{CDCl}_3$ )  $\delta$  8.46 – 8.42 (m, 1H), 7.49 – 7.43 (m, 1H), 7.37 – 7.26 (m, 4H), 7.22 (dd,  $J = 7.2$ , 7.2 Hz, 1H), 7.17 (d,  $J = 7.2$  Hz, 1H), 6.97 (dd,  $J = 7.8$ , 4.8 Hz, 1H), 3.43 (t,  $J = 7.8$  Hz, 2H), 3.00 (t,  $J = 7.8$  Hz, 2H);  $^{13}\text{C}$  NMR (150 MHz,  $\text{CDCl}_3$ )  $\delta$  159.0, 149.6, 140.7, 135.9, 128.8, 128.5, 126.5, 122.5, 119.4, 35.9, 31.5. This compound was known: Qiao, Z.; Wei, J.; Jiang, X. *Org. Lett.* **2014**, 16, 1212.

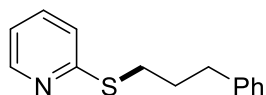

**2-((3-Phenylpropyl)thio)pyridine (3au).** Colorless oil.  $^1\text{H}$  NMR (600 MHz,  $\text{CDCl}_3$ )  $\delta$  8.41 (d,  $J = 4.2$  Hz, 1H), 7.47 – 7.43 (m, 1H), 7.32 – 7.25 (m, 2H), 7.22 – 7.14 (m, 4H), 7.03 – 6.89 (m, 1H), 3.28 – 3.11 (m, 2H), 2.88 – 2.74 (m, 2H), 2.09 – 2.00 (m, 2H);  $^{13}\text{C}$  NMR (150 MHz,  $\text{CDCl}_3$ )  $\delta$  159.3, 149.6, 141.6, 136.0, 128.6, 128.5, 126.0, 122.3, 119.4, 35.0, 31.1, 29.6. This compound was known: Legarda, P. D.; García-Rubia, A.; Arrayás, R. G.; Carretero, J. C. *Adv. Synth. Catal.* **2016**, 358, 1065.

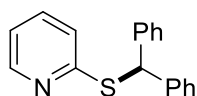

**2-(Benzhydrylthio)pyridine (3av).** White solid. 69 – 70 °C.  $^1\text{H}$  NMR (600 MHz,  $\text{CDCl}_3$ )  $\delta$  8.39 (d,  $J = 2.4$  Hz, 1H), 7.48 (d,  $J = 7.2$  Hz, 4H), 7.42 – 7.39 (m, 1H), 7.34 – 7.25 (m, 4H), 7.22 (dd,  $J = 7.2, 7.2$  Hz, 2H), 7.11 (d,  $J = 7.8$  Hz, 1H), 6.93 (dd,  $J = 6.6, 5.4$  Hz, 1H), 6.35 (s, 1H);  $^{13}\text{C}$  NMR (150 MHz,  $\text{CDCl}_3$ )  $\delta$  158.4, 149.5, 141.4, 136.3, 128.7, 128.6, 127.2, 122.4, 52.8. This compound was known: Duffy, B. C.; Howard, K. T.; Chisholm, J. D. *Tetrahedron Lett.* **2015**, 56, 3301.

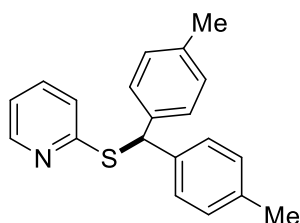

**2-((Di-p-tolylmethyl)thio)pyridine (3aw).** White solid. 86 – 87 °C.  $^1\text{H}$  NMR (600 MHz,  $\text{CDCl}_3$ )  $\delta$  8.42 – 8.35 (m, 1H), 7.42 – 7.37 (m, 1H), 7.35 (d,  $J = 7.8$  Hz, 4H), 7.09 (d,  $J = 7.8$  Hz, 5H), 6.92 (dd,  $J = 7.8, 4.8$  Hz, 1H), 6.24 (s, 1H), 2.30 (s, 6H);  $^{13}\text{C}$  NMR (150 MHz,  $\text{CDCl}_3$ )  $\delta$  158.9, 149.5, 138.6, 136.8, 136.2, 129.3, 128.5, 122.3, 119.8, 52.3, 21.2. IR (KBr):  $\nu$  2954, 2921, 2853, 1574, 1556, 1508, 1453, 1413, 1157, 1146, 1120, 1043, 808, 782, 761, 750  $\text{cm}^{-1}$ . HRMS (ESI) for  $\text{C}_{20}\text{H}_{20}\text{NS}$  (M+H) Calcd: 306.1316; found: 306.1327.

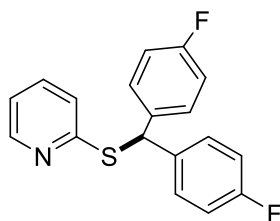



**2-((Bis(4-fluorophenyl)methyl)thio)pyridine (3ax).** White solid. 60 – 61 °C. <sup>1</sup>H NMR (600 MHz, CDCl<sub>3</sub>) δ 8.38 – 8.35 (m, 1H), 7.41 – 7.45 (m, 1H), 7.41 – 7.36 (m, 4H), 7.10 (d, *J* = 8.4 Hz, 1H), 6.99 – 6.94 (m, 5H), 6.32 (s, 1H); <sup>13</sup>C NMR (150 MHz, CDCl<sub>3</sub>) δ 161.9 (d, *J* = 246.5 Hz), 157.8, 149.6, 137.1, 136.3, 130.2 (d, *J* = 8.2 Hz), 122.5, 120.1, 115.5 (d, *J* = 21.6 Hz). IR (KBr): ν 2994, 2924, 2853, 1600, 1575, 1554, 1503, 1465, 1453, 1412, 1221, 1157, 1148, 1121, 1099, 864, 826, 821, 793, 779, 751, 732 cm<sup>-1</sup>. HRMS (ESI) for C<sub>18</sub>H<sub>14</sub>F<sub>2</sub>NS (M+H) Calcd: 314.0185; found: 314.0174.

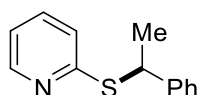

**2-((1-Phenylethyl)thio)pyridine (3ay).** Yellow oil. <sup>1</sup>H NMR (600 MHz, CDCl<sub>3</sub>) δ 8.44 (d, *J* = 4.8 Hz, 1H), 7.46 – 7.40 (m, 3H), 7.30 (dd, *J* = 7.2, 7.2 Hz, 2H), 7.22 (dd, *J* = 7.2, 7.2 Hz, 1H), 7.10 (d, *J* = 7.8 Hz, 1H), 6.96 (dd, *J* = 6.6, 5.4 Hz, 1H), 5.10 (q, *J* = 7.2 Hz, 1H), 1.74 (d, *J* = 7.2 Hz, 3H); <sup>13</sup>C NMR (150 MHz, CDCl<sub>3</sub>) δ 158.9, 149.6, 143.4, 136.1, 128.6, 127.5, 127.2, 122.9, 119.7, 43.7, 22.7. This compound was known: Ma, H.; Ren, X.; Zhou, X.; Ma, C.; He, Y.; Huang, G. *Tetrahedron Lett.* **2015**, *56*, 6022.

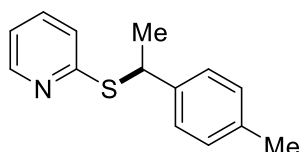

**2-((1-(p-Tolyl)ethyl)thio)pyridine (3az).** Yellow oil. <sup>1</sup>H NMR (600 MHz, CDCl<sub>3</sub>) δ 8.44 (d, *J* = 4.8 Hz, 1H), 7.46 – 7.38 (m, 1H), 7.33 (d, *J* = 7.8 Hz, 2H), 7.12 – 7.07 (m, 3H), 7.00 – 6.89 (m, 1H), 5.05 (q, *J* = 7.2 Hz, 1H), 2.30 (s, 3H), 1.72 (d, *J* = 7.2 Hz, 3H); <sup>13</sup>C NMR (150 MHz, CDCl<sub>3</sub>) δ 159.1, 149.6, 140.3, 136.9, 136.0, 129.3, 127.3, 122.9, 119.7, 43.4, 22.7, 21.2. This compound was known: Ma, H.; Ren, X.; Zhou, X.; Ma, C.; He, Y.; Huang, G. *Tetrahedron Lett.* **2015**, *56*, 6022.

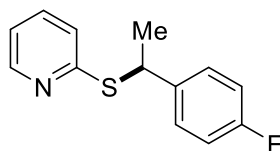

**2-((1-(4-Fluorophenyl)ethyl)thio)pyridine (3aB).** Yellow oil. <sup>1</sup>H NMR (600 MHz, CDCl<sub>3</sub>) δ 8.43 (d, *J* = 4.8 Hz, 1H), 7.46 – 7.35 (m, 3H), 7.08 (d, *J* = 8.4 Hz, 1H), 6.99 – 6.91 (m, 3H), 5.09 (q, *J* = 7.2 Hz, 1H), 1.71 (d, *J* = 7.2 Hz, 3H); <sup>13</sup>C NMR (150 MHz, CDCl<sub>3</sub>) δ 161.9 (d, *J* = 245.2 Hz), 158.6, 149.6, 139.2, 136.1, 129.0 (d, *J* = 8.2 Hz), 123.0, 119.9, 115.3 (d, *J* = 21.5 Hz), 42.9, 22.7. This compound was known: Ma, H.; Ren, X.; Zhou, X.; Ma, C.; He, Y.; Huang, G. *Tetrahedron Lett.* **2015**, *56*, 6022.

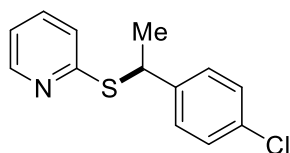

**2-((1-(4-Chlorophenyl)ethyl)thio)pyridine (3aC).** Yellow oil.  $^1\text{H}$  NMR (600 MHz,  $\text{CDCl}_3$ )  $\delta$  8.42 (d,  $J = 4.8$  Hz, 1H), 7.45 – 7.42 (m, 1H), 7.37 (d,  $J = 8.4$  Hz, 2H), 7.26 – 7.23 (m, 2H), 7.08 (d,  $J = 8.4$  Hz, 1H), 6.96 (dd,  $J = 7.2, 4.8$  Hz, 1H), 5.08 (q,  $J = 7.2$  Hz, 1H), 1.69 (d,  $J = 7.2$  Hz, 3H);  $^{13}\text{C}$  NMR (150 MHz,  $\text{CDCl}_3$ )  $\delta$  158.4, 149.6, 142.2, 136.2, 132.8, 128.9, 128.6, 123.0, 119.9, 42.9, 22.5. This compound was known: Ma, H.; Ren, X.; Zhou, X.; Ma, C.; He, Y.; Huang, G. *Tetrahedron Lett.* **2015**, *56*, 6022.

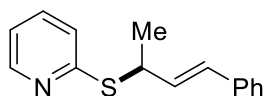

**(E)-2-((4-Phenylbut-3-en-2-yl)thio)pyridine (3aD).** Colorless oil.  $^1\text{H}$  NMR (600 MHz,  $\text{CDCl}_3$ )  $\delta$  8.45 (d,  $J = 4.2$  Hz, 1H), 7.48 – 6.44 (m, 1H), 7.32 (d,  $J = 7.8$  Hz, 2H), 7.30 – 7.25 (m, 2H), 7.21 – 7.16 (m, 2H), 7.00 – 6.94 (m, 1H), 6.55 (d,  $J = 15.6$  Hz, 1H), 6.31 (dd,  $J = 15.6, 7.8$  Hz, 1H), 4.72 – 6.67 (m, 1H), 1.59 (d,  $J = 6.8$  Hz, 3H).  $^{13}\text{C}$  NMR (150 MHz,  $\text{CDCl}_3$ )  $\delta$  158.6, 149.6, 137.0, 136.1, 131.3, 130.0, 128.6, 127.5, 126.4, 123.5, 119.9, 41.9, 20.5. This compound was known: Siddaraju, Y.; Prabhu, K. R. *J. Org. Chem.* **2018**, *83*, 11145.

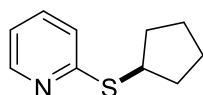

**2-(Cyclopentylthio)pyridine (3aE).** Colorless oil.  $^1\text{H}$  NMR (600 MHz,  $\text{CDCl}_3$ )  $\delta$  8.41 (d,  $J = 4.8$  Hz, 1H), 7.46 – 7.43 (m, 1H), 7.15 (d,  $J = 8.4$  Hz, 1H), 7.01 – 6.86 (m, 1H), 4.07 – 3.96 (m, 1H), 2.24 – 2.13 (m, 2H), 1.81 – 1.74 (m, 2H), 1.67 – 1.60 (m, 4H);  $^{13}\text{C}$  NMR (150 MHz,  $\text{CDCl}_3$ )  $\delta$  160.6, 149.6, 135.9, 122.3, 119.2, 43.1, 33.6, 25.0. This compound was known: Wang, Q.; Zhu, B.; Yang, G.; Ma, X.; Xu, Q. *Chin. J. Org. Chem.* **2021**, *41*, 1193.

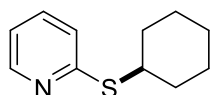

**2-(Cyclohexylthio)pyridine (3aF).** Colorless oil.  $^1\text{H}$  NMR (600 MHz,  $\text{CDCl}_3$ )  $\delta$  8.41 (d,  $J = 3.6$  Hz, 1H), 7.47 – 7.40 (m, 1H), 7.14 (dd,  $J = 5.4, 5.4$  Hz, 1H), 6.98 – 6.89 (m, 1H), 3.79 (d,  $J = 3.6$  Hz, 1H), 2.11 – 2.04 (m, 2H), 1.80 – 1.71 (m, 2H), 1.64 – 1.58 (m, 1H), 1.48 – 1.42 (m, 4H), 1.32 – 1.25 (m, 1H).  $^{13}\text{C}$  NMR (150 MHz,  $\text{CDCl}_3$ )  $\delta$  159.3, 149.6, 136.0, 123.0, 119.4, 43.0, 33.4, 26.1, 25.9. This compound was known: Zhao, J.; Fang, H.; Han, J.; Pan, Y.; Li, G. *Adv. Synth.*

Catal. **2014**, 356, 2719.

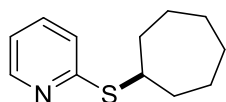

**2-(Cycloheptylthio)pyridine (3aG)**. Colorless oil.  $^1\text{H}$  NMR (600 MHz,  $\text{CDCl}_3$ )  $\delta$  8.41 (dd,  $J = 4.8, 1.9$  Hz), 7.48 – 7.41 (m, 1H), 7.16 – 7.10 (m, 1H), 6.97 – 6.89 (m, 1H), 3.97 (tt,  $J = 9.0, 4.2$  Hz, 1H), 2.12 – 2.07 (m, 2H), 1.74 – 1.66 (m, 4H), 1.64 – 1.55 (m, 6H).  $^{13}\text{C}$  NMR (150 MHz,  $\text{CDCl}_3$ )  $\delta$  159.8, 149.6, 135.9, 122.9, 119.3, 44.7, 34.9, 28.5, 26.0. This compound was known: Wang, Q.; Zhu, B.; Yang, G.; Ma, X.; Xu, Q. *Chin. J. Org. Chem.* **2021**, 41, 1193.

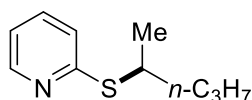

**2-(Pentan-2-ylthio)pyridine (3aH)**. Colorless oil.  $^1\text{H}$  NMR (600 MHz,  $\text{CDCl}_3$ )  $\delta$  8.41 (d,  $J = 4.2$  Hz, 1H), 7.46 – 6.42 (m, 1H), 7.14 (d,  $J = 8.4$  Hz, 1H), 7.02 – 6.88 (m, 1H), 3.90 (dq,  $J = 13.8, 6.6$  Hz, 1H), 1.69 – 1.65 (m, 1H), 1.60 – 1.55 (m, 1H), 1.49 – 1.42 (m, 2H), 1.38 (d,  $J = 6.6$  Hz, 3H), 0.91 (t,  $J = 7.2$  Hz, 3H);  $^{13}\text{C}$  NMR (150 MHz,  $\text{CDCl}_3$ )  $\delta$  159.7, 149.6, 135.9, 123.0, 119.3, 39.7, 38.9, 21.5, 20.4, 14.1. This compound was known: Xiao, Z.; Wang, L.; Wei, J.; Ran, C.; Liang, S.H.; Shang, J.; Chen, G.-Y.; Zheng, C. *Chem. Commun.* **2020**, 56, 4164.

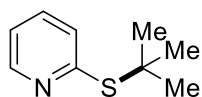

**2-(Tert-butylthio)pyridine (3aI)**. Colorless oil.  $^1\text{H}$  NMR (600 MHz,  $\text{CDCl}_3$ )  $\delta$  8.51 (d,  $J = 4.8$  Hz, 1H), 7.52 – 7.47 (m, 1H), 7.32 (d,  $J = 7.8$  Hz, 1H), 7.10 – 7.03 (m, 1H), 1.49 (s, 9H);  $^{13}\text{C}$  NMR (150 MHz,  $\text{CDCl}_3$ )  $\delta$  158.5, 149.6, 136.1, 127.7, 121.0, 47.7, 31.2. This compound was known: Xiao, Z.; Wang, L.; Wei, J.; Ran, C.; Liang, S.H.; Shang, J.; Chen, G.-Y.; Zheng, C. *Chem. Commun.* **2020**, 56, 4164.

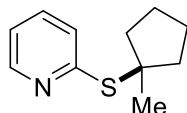

**2-((1-Methylcyclopentyl)thio)pyridine (3aJ)**. Colorless oil.  $^1\text{H}$  NMR (600 MHz,  $\text{CDCl}_3$ )  $\delta$  8.46 (dd,  $J = 4.8, 1.2$  Hz, 1H), 7.49 – 7.45 (m, 1H), 7.33 – 7.21 (m, 1H), 7.05 – 6.97 (m, 1H), 2.15 – 2.05 (m, 2H), 1.85 – 1.79 (m, 2H), 1.76 – 1.67 (m, 4H), 1.62 (s, 3H).  $^{13}\text{C}$  NMR (150 MHz,  $\text{CDCl}_3$ )  $\delta$  149.6, 135.9, 126.0, 120.3, 41.0, 29.8, 28.8, 24.4. IR (KBr):  $\nu$  2955, 2923, 2853, 1578, 1556, 1452, 1413, 1123, 757, 733  $\text{cm}^{-1}$ . HRMS (ESI) for  $\text{C}_{11}\text{H}_{16}\text{NS}$  ( $\text{M}+\text{H}$ ) Calcd: 194.1003;

found: 193.9992.

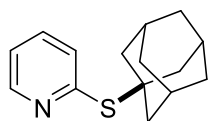

**2-(1-Adamantanyltio)pyridine (3aK).** White solid. 78 – 79 °C.  $^1\text{H}$  NMR (600 MHz,  $\text{CDCl}_3$ )  $\delta$  8.52 (d,  $J = 4.8$  Hz, 1H), 7.55 – 7.50 (m, 1H), 7.37 (d,  $J = 7.2$  Hz, 1H), 7.12 – 7.06 (m, 1H), 2.05 (d,  $J = 2.4$  Hz, 6H), 2.02 (s, 3H), 1.66 (t,  $J = 2.4$  Hz, 6H);  $^{13}\text{C}$  NMR (150 MHz,  $\text{CDCl}_3$ )  $\delta$  156.8, 149.7, 136.1, 129.2, 121.5, 50.1, 43.7, 36.3, 30.1. This compound was known: Ho, J.; Zheng, J.; Meana-Pañeda, R.; Truhlar, D. G.; Ko, E. J.; Savage, G. P.; Tsanaktsidis, J. *J. Org. Chem.* **2013**, *78*, 6677.

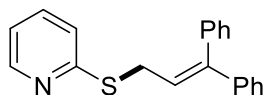

**2-((3,3-Diphenylallyl)thio)pyridine (3aL).** Colorless oil.  $^1\text{H}$  NMR (600 MHz,  $\text{CDCl}_3$ )  $\delta$  8.40 (d,  $J = 4.8$  Hz, 1H), 7.47 – 7.42 (m, 1H), 7.40 (dd,  $J = 7.2$ , 7.2 Hz, 2H), 7.34 (dd,  $J = 7.2$ , 7.2 Hz, 1H), 7.27 – 7.20 (m, 7H), 7.13 (d,  $J = 7.8$  Hz, 1H), 6.96 (dd,  $J = 6.6$ , 4.8 Hz, 1H), 6.28 (t,  $J = 7.8$  Hz, 1H), 3.91 (d,  $J = 7.8$  Hz, 2H).  $^{13}\text{C}$  NMR (150 MHz,  $\text{CDCl}_3$ )  $\delta$  158.9, 149.5, 144.4, 142.1, 139.2, 136.0, 130.1, 128.4, 128.2, 127.63, 127.55, 127.51, 124.3, 122.2, 119.5, 30.1. IR (KBr):  $\nu$  3054, 2972, 2927, 1598, 1577, 1444, 1413, 1123, 1043, 757, 696  $\text{cm}^{-1}$ . HRMS (ESI) for  $\text{C}_{20}\text{H}_{18}\text{NS}$  (M+H) Calcd: 304.1160; found: 304.1172.

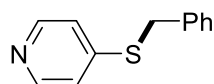

**4-(Benzylthio)pyridine (3ba).** White solid. 60 – 61 °C.  $^1\text{H}$  NMR (600 MHz,  $\text{CDCl}_3$ )  $\delta$  8.43 – 8.32 (m, 2H), 7.39 (d,  $J = 7.2$  Hz, 2H), 7.33 (d,  $J = 7.2$  Hz, 2H), 7.28 (d,  $J = 7.2$  Hz, 1H), 7.14 – 7.09 (m, 2H), 4.20 (s, 2H);  $^{13}\text{C}$  NMR (150 MHz,  $\text{CDCl}_3$ )  $\delta$  149.4, 149.1, 135.6, 128.9, 128.8, 127.8, 120.9, 35.8. This compound was known: Ma, X.; Yu, L.; Su, C.; Yang, Y.; Li, H.; Xu, Q. *Adv. Synth. Catal.* **2017**, 359, 1649.

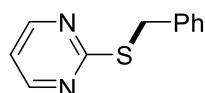

**2-(Benzylthio)pyrimidine (3ca).** White solid. 55 – 56 °C.  $^1\text{H}$  NMR (600 MHz,  $\text{CDCl}_3$ )  $\delta$  8.51 (d,  $J = 4.8$  Hz, 2H), 7.43 (d,  $J = 7.2$  Hz, 2H), 7.32 – 7.28 (m, 2H), 7.26 – 7.21 (m, 1H), 6.96 – 6.94 (m, 1H), 4.41 (s, 2H);  $^{13}\text{C}$  NMR (150 MHz,  $\text{CDCl}_3$ )  $\delta$  157.3, 137.5, 129.2, 128.6, 127.3, 116.7, 35.4. This compound was known: Ma, X.; Yu, L.; Su, C.; Yang, Y.; Li, H.; Xu, Q. *Adv. Synth.*

*Catal.* **2017**, 359, 1649.

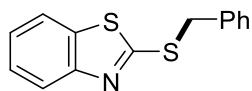

**2-(Benzylthio)benzo[d]thiazole (3da).** White solid. 38 – 39 °C. <sup>1</sup>H NMR (600 MHz, CDCl<sub>3</sub>) δ 7.89 (d, *J* = 7.8 Hz, 1H), 7.74 (d, *J* = 7.8 Hz, 1H), 7.47 – 7.39 (m, 3H), 7.35 – 7.27 (m, 4H), 4.60 (s, 2H); <sup>13</sup>C NMR (150 MHz, CDCl<sub>3</sub>) δ 166.5, 153.2, 136.2, 135.4, 129.3, 128.8, 127.9, 126.2, 124.4, 121.6, 121.1, 37.8. This compound was known: Kumar, D.; Mishra, B. B.; Tiwari, V. K. *J. Org. Chem.* **2013**, 79, 251.

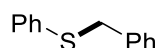

**Benzyl(phenyl)sulfane (3ea).** Colorless oil. <sup>1</sup>H NMR (600 MHz, CDCl<sub>3</sub>) δ 7.34 – 7.27 (m, 6H), 7.27 – 7.22 (m, 3H), 7.20 – 7.15 (m, 1H), 4.11 (s, 2H); <sup>13</sup>C NMR (150 MHz, CDCl<sub>3</sub>) δ 137.5, 136.4, 129.9, 128.9, 128.6, 127.3, 126.4, 39.1. This compound was known: Yang, Y.; Ye, Z.; Zhang, X.; Zhou, Y.; Ma, X.; Cao, H.; Li, H.; Yu, L.; Xu, Q. *Org. Biomol. Chem.* **2017**, 15, 9638.

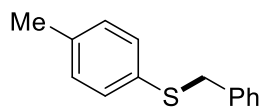

**Benzyl(p-tolyl)sulfane (3fa).** Colorless oil. <sup>1</sup>H NMR (600 MHz, CDCl<sub>3</sub>) δ 7.31 – 7.25 (m, 4H), 7.24 – 7.19 (m, 2H), 7.07 (d, *J* = 7.8 Hz, 2H), 4.07 (s, 2H), 2.31 (s, 3H); <sup>13</sup>C NMR (150 MHz, CDCl<sub>3</sub>) δ 137.9, 136.7, 132.5, 130.8, 129.7, 128.9, 128.5, 127.2, 39.9, 21.2. This compound was known: Yang, Y.; Ye, Z.; Zhang, X.; Zhou, Y.; Ma, X.; Cao, H.; Li, H.; Yu, L.; Xu, Q. *Org. Biomol. Chem.* **2017**, 15, 9638.

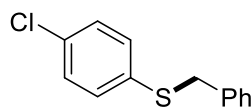

**Benzyl(4-chlorophenyl)sulfane (3ga).** White solid. 48 – 49 °C. <sup>1</sup>H NMR (600 MHz, CDCl<sub>3</sub>) δ 7.30 – 7.20 (m, 9H), 4.07 (s, 2H). <sup>13</sup>C NMR (150 MHz, CDCl<sub>3</sub>) δ 137.2, 134.7, 132.6, 131.5, 129.0, 128.9, 128.6, 127.4, 39.4. This compound was known: Yang, Y.; Ye, Z.; Zhang, X.; Zhou, Y.; Ma, X.; Cao, H.; Li, H.; Yu, L.; Xu, Q. *Org. Biomol. Chem.* **2017**, 15, 9638.

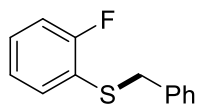

**Benzyl(2-fluorophenyl)sulfane (3ha).** Colorless oil.  $^1\text{H}$  NMR (600 MHz,  $\text{CDCl}_3$ )  $\delta$  7.26 – 6.99 (m, 9H), 4.09 (s, 2H);  $^{13}\text{C}$  NMR (150 MHz,  $\text{CDCl}_3$ )  $\delta$  161.8 (d,  $J = 245.2$  Hz), 137.3, 133.1, 128.9, 128.9, 128.6, 127.3, 124.4 (d,  $J = 3.3$  Hz), 122.8 (d,  $J = 17.9$  Hz), 115.7 (d,  $J = 22.5$  Hz), 38.5 (d,  $J = 2.0$  Hz). This compound was known: Li, Y.; Pu, J.; Jiang, X. *Org. Lett.* **2014**, *16*, 2692.

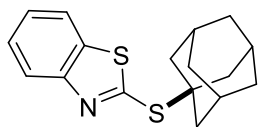

**2-((1-adamantanyl)thio)benzo[d]thiazole (3dK).** White solid. 120 – 121 °C.  $^1\text{H}$  NMR (600 MHz,  $\text{CDCl}_3$ )  $\delta$  7.94 (d,  $J = 8.2$  Hz, 1H), 7.73 (d,  $J = 7.9$  Hz, 1H), 7.38 (dd,  $J = 11.5, 4.1$  Hz, 1H), 7.31 – 7.27 (m, 1H), 2.09 (d,  $J = 2.9$  Hz, 6H), 2.02 (s, 3H), 1.63 (s, 6H);  $^{13}\text{C}$  NMR (150 MHz,  $\text{CDCl}_3$ )  $\delta$  161.9, 153.8, 137.1, 126.1, 125.1, 122.9, 121.0, 53.0, 43.6, 36.1, 30.3. IR (KBr):  $\nu$  2917, 2849, 1735, 1467, 1371, 1236, 1020, 960, 720, 628, 608  $\text{cm}^{-1}$ . HRMS (ESI) for  $\text{C}_{17}\text{H}_{20}\text{NS}_2$  (M+H) Calcd: 301.0959; found: 301.0950.

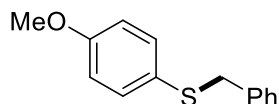

**Benzyl(4-methoxyphenyl)sulfane (3ia).** White solid. 48 – 49 °C.  $^1\text{H}$  NMR (600 MHz,  $\text{CDCl}_3$ )  $\delta$  7.28 – 7.15 (m, 7H), 6.84 – 6.74 (m, 2H), 3.98 (s, 2H), 3.77 (s, 3H);  $^{13}\text{C}$  NMR (150 MHz,  $\text{CDCl}_3$ )  $\delta$  159.3, 138.2, 134.2, 129.0, 128.5, 127.1, 126.1, 114.5, 55.4, 41.3. This compound was known: Yang, Y.; Ye, Z.; Zhang, X.; Zhou, Y.; Ma, X.; Cao, H.; Li, H.; Yu, L.; Xu, Q. *Org. Biomol. Chem.* **2017**, *15*, 9638.

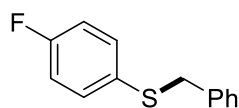

**Benzyl(4-fluorophenyl)sulfane (3ja).** Colorless oil.  $^1\text{H}$  NMR (600 MHz,  $\text{CDCl}_3$ )  $\delta$  7.27 – 7.19 (m, 7H), 6.96 – 6.90 (m, 2H), 4.02 (s, 2H);  $^{13}\text{C}$  NMR (150 MHz,  $\text{CDCl}_3$ )  $\delta$  162.2 (d,  $J = 246.9$  Hz), 137.6, 133.5 (d,  $J = 7.9$  Hz), 130.8, 128.9, 128.6, 127.3, 116.0 (d,  $J = 21.7$  Hz), 40.5. This compound was known: Reeves, J. T.; Camara, K.; Han, Z.; Xu, Y.; Lee, H.; Busacca, C.; Senanayake, C. H. *Org. Lett.* **2014**, *16*, 1196.

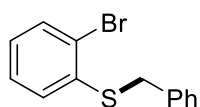

**Benzyl(2-bromophenyl)sulfane (3ka).** White solid. 49 – 50 °C.  $^1\text{H}$  NMR (600 MHz,  $\text{CDCl}_3$ )  $\delta$  7.54 (d,  $J = 7.8$  Hz, 1H), 7.36 (d,  $J = 7.2$  Hz, 2H), 7.30 (dd,  $J = 7.2, 7.2$  Hz, 2H), 7.28 – 7.19 (m, 3H), 7.08 – 6.97 (m, 1H), 4.15 (s, 2H);  $^{13}\text{C}$  NMR (150 MHz,  $\text{CDCl}_3$ )  $\delta$  138.0, 136.2, 133.0, 129.1, 128.9, 128.7, 127.8, 127.5, 127.0, 123.7, 38.0. This compound was known: Li, Y.; Pu, J.; Jiang, X. *Org. Lett.* **2014**, *16*, 2692.

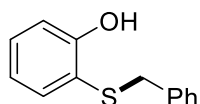

**2-(Benzylthio)phenol (3la).** Colorless oil.  $^1\text{H}$  NMR (600 MHz,  $\text{CDCl}_3$ )  $\delta$  7.29 – 7.22 (m, 5H), 7.10 – 7.02 (m, 2H), 6.92 (d,  $J = 7.8$  Hz, 1H), 6.82 – 6.78 (m, 1H), 6.54 (d,  $J = 1.8$  Hz, 1H), 3.84 (s, 2H);  $^{13}\text{C}$  NMR (150 MHz,  $\text{CDCl}_3$ )  $\delta$  157.2, 137.7, 136.5, 131.5, 128.9, 128.7, 127.5, 120.7, 118.3, 114.8, 41.5. This compound was known: Li, Y.; Pu, J.; Jiang, X. *Org. Lett.* **2014**, *16*, 2692.

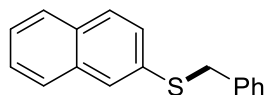

**Benzyl(naphthalen-2-yl)sulfane (3ma).** White solid. 89 – 90 °C.  $^1\text{H}$  NMR (600 MHz,  $\text{CDCl}_3$ )  $\delta$  7.78 (d,  $J = 7.8$  Hz, 1H), 7.77 – 7.72 (m, 2H), 7.71 (d,  $J = 7.8$  Hz, 1H), 7.49 – 7.39 (m, 3H), 7.34 (d,  $J = 7.2$  Hz, 2H), 7.31 – 7.28 (m, 2H), 7.28 – 7.22 (m, 1H), 4.23 (s, 2H);  $^{13}\text{C}$  NMR (150 MHz,  $\text{CDCl}_3$ )  $\delta$  137.4, 134.0, 133.8, 132.0, 129.0, 128.7, 128.4, 127.8, 127.8, 127.7, 127.4, 127.3, 126.6, 125.8, 39.0. This compound was known: Yang, Y.; Ye, Z.; Zhang, X.; Zhou, Y.; Ma, X.; Cao, H.; Li, H.; Yu, L.; Xu, Q. *Org. Biomol. Chem.* **2017**, *15*, 9638.

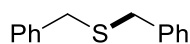

**Dibenzylsulfane (3na).** White solid. 48 – 49 °C.  $^1\text{H}$  NMR (600 MHz,  $\text{CDCl}_3$ )  $\delta$  7.46 – 7.14 (m, 10H), 3.60 (s, 4H);  $^{13}\text{C}$  NMR (150 MHz,  $\text{CDCl}_3$ )  $\delta$  138.2, 129.1, 128.6, 127.1, 35.7. This compound was known: Y Yang, Y.; Ye, Z.; Zhang, X.; Zhou, Y.; Ma, X.; Cao, H.; Li, H.; Yu, L.; Xu, Q. *Org. Biomol. Chem.* **2017**, *15*, 9638.

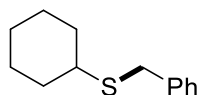

**Benzyl(cyclohexyl)sulfane (3oa).** Colorless oil.  $^1\text{H}$  NMR (600 MHz,  $\text{CDCl}_3$ )  $\delta$  7.35 – 7.20 (m, 5H), 3.73 (s, 2H), 2.59 – 2.52 (m, 1H), 2.01 – 1.90 (m, 2H), 1.77 – 1.70 (m, 2H), 1.41 – 1.10 (m, 6H);  $^{13}\text{C}$  NMR (150 MHz,  $\text{CDCl}_3$ )  $\delta$  139.0, 128.8, 128.5, 126.9, 43.0, 34.7, 33.5, 26.1, 26.0. This

compound was known: Yang, Y.; Ye, Z.; Zhang, X.; Zhou, Y.; Ma, X.; Cao, H.; Li, H.; Yu, L.; Xu, Q. *Org. Biomol. Chem.* **2017**, *15*, 9638.

**Typical procedure for the acid-catalyzed addition reactions of disulfide with alkenes or alkynes.** The mixture of di(pyridin-2-yl)disulfide **1a** (82.5 mg, 0.375 mmol), styrene **5a** (52.0 mg, 0.50 mmol, 1.0 equiv.), water (45.0 mg, 2.5 mmol, 5.0 equiv.) and TsOH·H<sub>2</sub>O (95.0 mg, 0.50 mmol, 100 mol%) was sealed in a Schlenk tube (10 mL) under nitrogen and stirred at 130 °C for 12 h. The reaction mixture was then analyzed by TLC/GC-MS and purified by flash column chromatography on silica gel using ethyl acetate and petroleum ether (0~ 1/20) as the eluent, giving **6a** in 45% isolated yield.

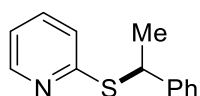

**2-((1-Phenylethyl)thio)pyridine (6a).** Yellow oil. <sup>1</sup>H NMR (600 MHz, CDCl<sub>3</sub>) δ 8.44 (d, *J* = 4.8 Hz, 1H), 7.46 – 7.40 (m, 3H), 7.30 (dd, *J* = 7.2, 7.2 Hz, 2H), 7.22 (dd, *J* = 7.2, 7.2 Hz, 1H), 7.10 (d, *J* = 7.8 Hz, 1H), 6.96 (dd, *J* = 6.6, 5.4 Hz 1H), 5.10 (q, *J* = 7.2 Hz, 1H), 1.74 (d, *J* = 7.2 Hz, 3H); <sup>13</sup>C NMR (150 MHz, CDCl<sub>3</sub>) δ 158.9, 149.6, 143.4, 136.1, 128.6, 127.5, 127.2, 122.9, 119.7, 43.7, 22.7. This compound was known: Ma, H.; Ren, X.; Zhou, X.; Ma, C.; He, Y.; Huang, G. *Tetrahedron Lett.* **2015**, *56*, 6022.

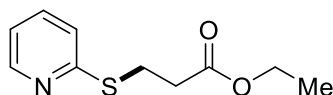

**Ethyl 3-(pyridin-2-ylthio)propanoate (6c).** Colorless oil. <sup>1</sup>H NMR (600 MHz, CDCl<sub>3</sub>) δ 8.39 (d, *J* = 4.2 Hz, 1H), 7.45 – 7.42 (m, 1H), 7.13 (d, *J* = 8.4 Hz, 1H), 6.99 – 6.89 (m, 1H), 4.13 (q, *J* = 7.2 Hz, 2H), 3.40 (t, *J* = 7.2 Hz, 2H), 2.74 (t, *J* = 7.2 Hz, 2H), 1.23 (t, *J* = 7.2 Hz, 3H); <sup>13</sup>C NMR (150 MHz, CDCl<sub>3</sub>) δ 172.2, 158.3, 149.5, 136.0, 122.4, 119.5, 60.7, 34.8, 25.0, 14.3. This compound was known: Gholinejad, M.; Firouzabadi, H. *New J. Chem.* **2015**, *39*, 5953.

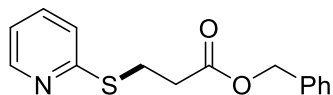

**Benzyl 3-(pyridin-2-ylthio)propanoate (6d).** Colorless oil. <sup>1</sup>H NMR (600 MHz, CDCl<sub>3</sub>) δ 8.40 (d, *J* = 4.8 Hz, 1H), 7.46 – 7.42 (m, 1H), 7.37 – 7.29 (m, 5H), 7.14 (d, *J* = 7.8 Hz, 1H), 6.96 – 6.94 (m, 1H), 5.14 (s, 2H), 3.45 (t, *J* = 7.2 Hz, 2H), 2.84 (t, *J* = 7.2 Hz, 2H); <sup>13</sup>C NMR (150 MHz, CDCl<sub>3</sub>) δ 172.1, 158.2, 149.6, 136.0, 135.9, 128.7, 128.3, 122.5, 119.6, 66.6, 34.8, 25.0. IR (KBr): ν 3034, 2997, 2939, 2854, 1731, 1578, 1556, 1454, 1414, 1124, 907, 756, 725, 696 cm<sup>-1</sup>. HRMS (ESI) for C<sub>15</sub>H<sub>16</sub>NO<sub>2</sub>S (M+H) Calcd: 274.0902; found: 274.0891.



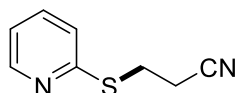

**3-(Pyridin-2-ylthio)propanenitrile (6e).** Colorless oil.  $^1\text{H}$  NMR (600 MHz,  $\text{CDCl}_3$ )  $\delta$  8.40 (d,  $J = 4.2$  Hz, 1H), 7.54 – 7.46 (m, 1H), 7.17 (d,  $J = 8.4$  Hz, 1H), 7.05 – 6.97 (m, 1H), 3.40 (t,  $J = 7.2$  Hz, 2H), 2.85 (t,  $J = 7.2$  Hz, 2H).  $^{13}\text{C}$  NMR (150 MHz,  $\text{CDCl}_3$ )  $\delta$  156.7, 149.7, 136.4, 122.8, 120.1, 118.7, 25.6, 18.8. This compound was known: Gholinejad, M.; Firouzabadi, H. *New J. Chem.* **2015**, 39, 5953.

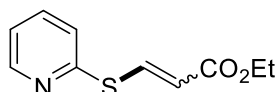

**Ethyl 3-(pyridin-2-ylthio)acrylate (6f).** Colorless oil. *Z* isomer:  $^1\text{H}$  NMR (600 MHz,  $\text{CDCl}_3$ )  $\delta$  8.51 (d,  $J = 10.2$  Hz, 1H), 8.49 (d,  $J = 4.8$  Hz, 1H), 7.58 – 7.54 (m, 1H), 7.28 (d,  $J = 8.4$  Hz, 1H), 7.10 – 7.08 (m, 1H), 6.06 (d,  $J = 10.2$  Hz), 4.22 (q,  $J = 7.8$  Hz, 2H), 1.30 (t,  $J = 7.8$  Hz, 3H); *E* isomer:  $^1\text{H}$  NMR (600 MHz,  $\text{CDCl}_3$ )  $\delta$  8.54 (d,  $J = 16.2$  Hz, 1H), 8.51 (d,  $J = 4.8$  Hz, 1H), 7.60 – 7.58 (m, 1H), 7.24 (d,  $J = 8.4$  Hz, 1H), 7.13 – 7.10 (m, 1H), 6.11 (d,  $J = 16.2$  Hz, 1H), 4.20 (q,  $J = 14.4$  Hz, 2H), 1.28 (t,  $J = 7.8$  Hz, 3H); *Z* isomer:  $^{13}\text{C}$  NMR (150 MHz,  $\text{CDCl}_3$ )  $\delta$  116.9, 155.3, 149.7, 142.0, 136.9, 123.4, 121.4, 114.0, 60.5, 14.4; *E* isomer:  $^{13}\text{C}$  NMR (150 MHz,  $\text{CDCl}_3$ )  $\delta$  165.3, 154.3, 150.2, 141.9, 137.0, 123.3, 121.6, 117.4, 60.5, 14.4. This compound was known: Kabir, M. S.; Lorenz, M.; Linn, M. L. V.; Namjoshi, O. A.; Ara, S.; Cook, J. M. *J. Org. Chem.* **2010**, 75, 3626.

### 3. Control Reactions for Mechanistic Studies

#### 3.1 Studies on the possibilities of S-S bond cleavage

##### 3.1.1 The reaction of **1a** and **2a** using BHT (**7a**) as the radical trapping reagent (eq. 1 in the main text)

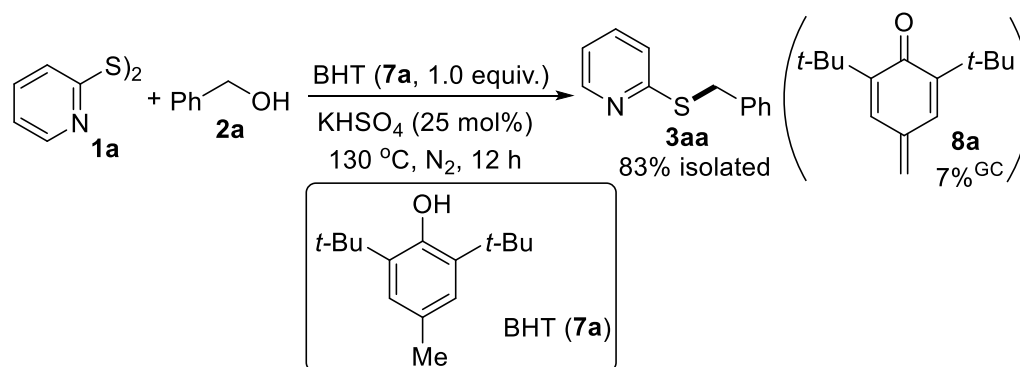

**Detailed Procedure:** The mixture of di(pyridin-2-yl)disulfide **1a** (82.5 mg, 0.375 mmol), benzyl alcohol **2a** (54.0 mg, 0.50 mmol), KHSO<sub>4</sub> (17.0 mg, 0.125 mmol, 25 mol%), and BHT **7a** (110.0 mg, 0.50 mmol, 1.0 equiv.) was directly sealed in a Schlenk tube (10 mL) under nitrogen, and then stirred at 130 °C for 12 h. The reaction mixture was analyzed by TLC/GC-MS, and then purified by flash column chromatography on silica gel using ethyl acetate and petroleum ether (0~ 1/50) as the eluent, giving **3aa** in 83% isolated yield.

#### GC Spectra

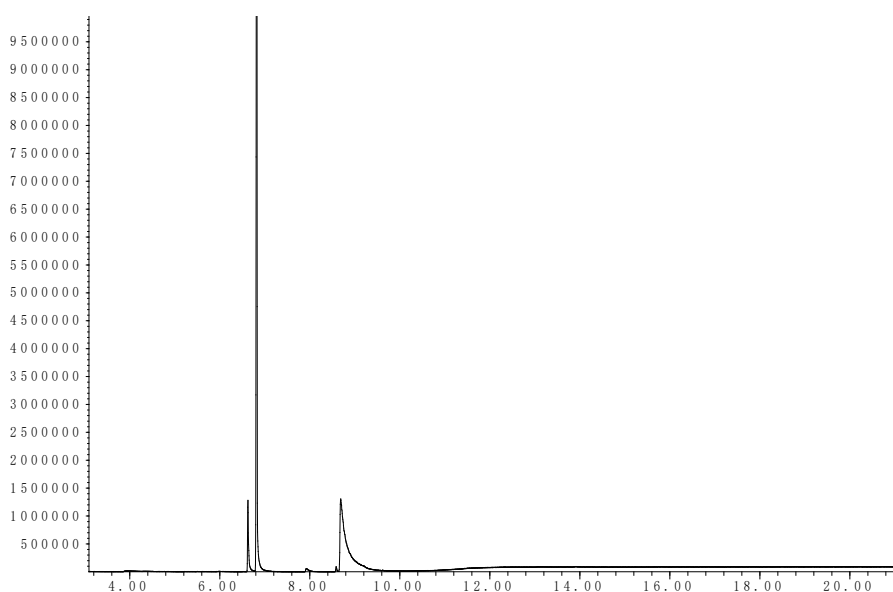

| Run | Time /min | Start scanning | Peak scanning | Stop scanning | Peak type | Hight    | Correction area | Correction maximum% | Total%        |
|-----|-----------|----------------|---------------|---------------|-----------|----------|-----------------|---------------------|---------------|
| 1   | 6.629     | 755            | 760           | 778           | M         | 1283166  | 19880827        | 8.01                | <b>7.415</b>  |
| 2   | 6.820     | 791            | 802           | 829           | M         | 20587982 | 248230085       | 100.00              | <b>92.585</b> |

## MS Spectra

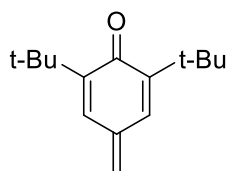

T = 6.629 min, m/z = 218,

(8a)

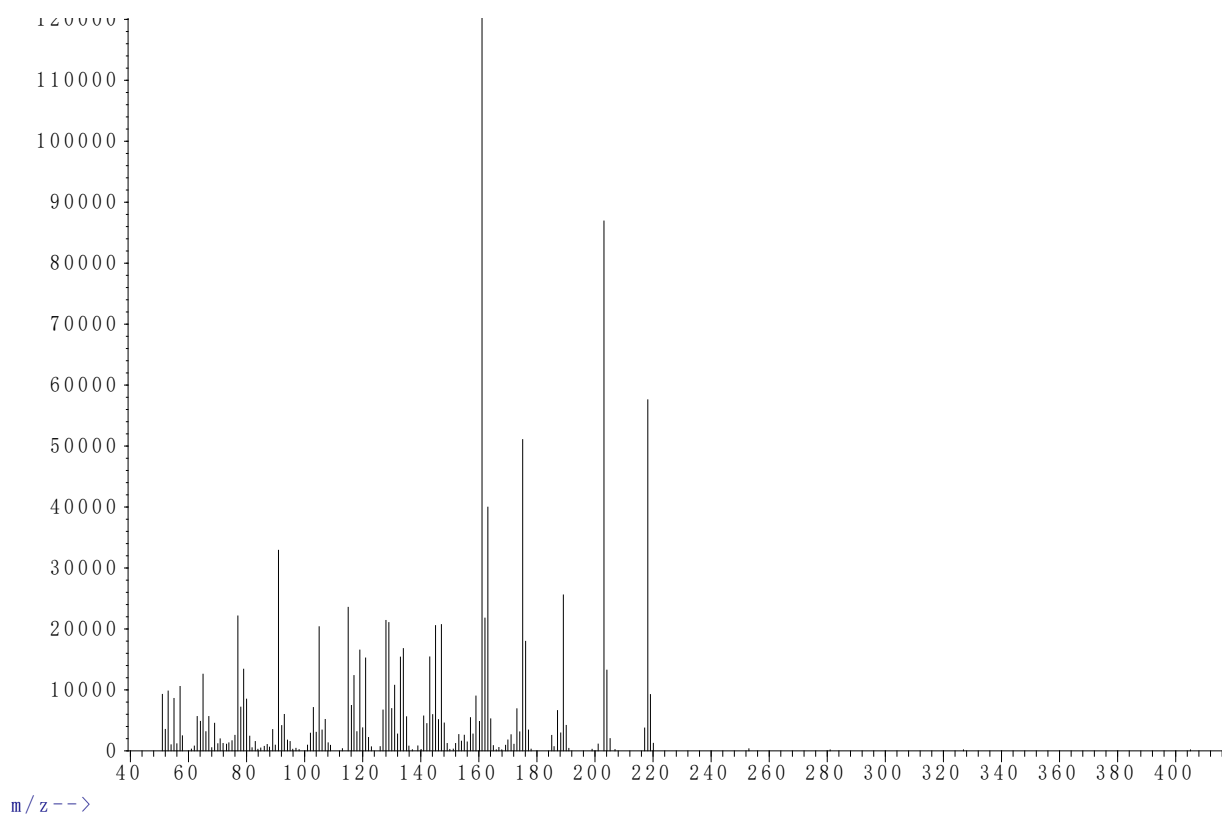

T = 6.820 min, m/z = 220, BHT (**7a**)

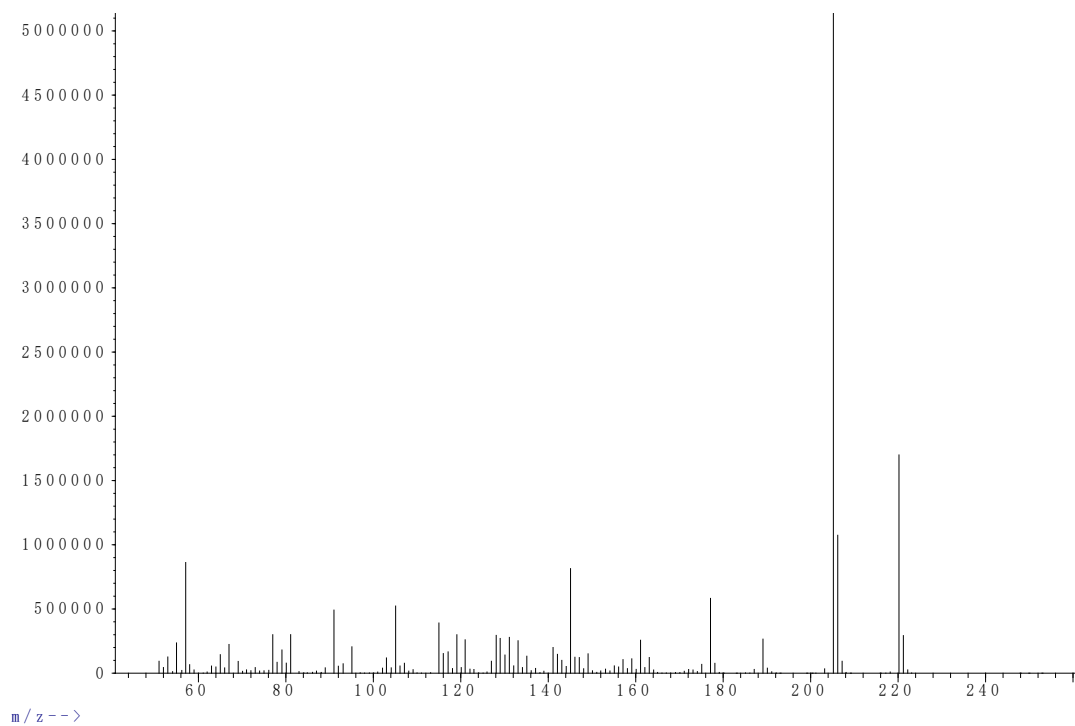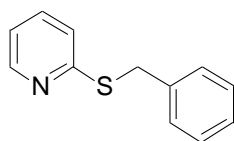

T = 8.751 min, m/z = 201, (**3aa**)

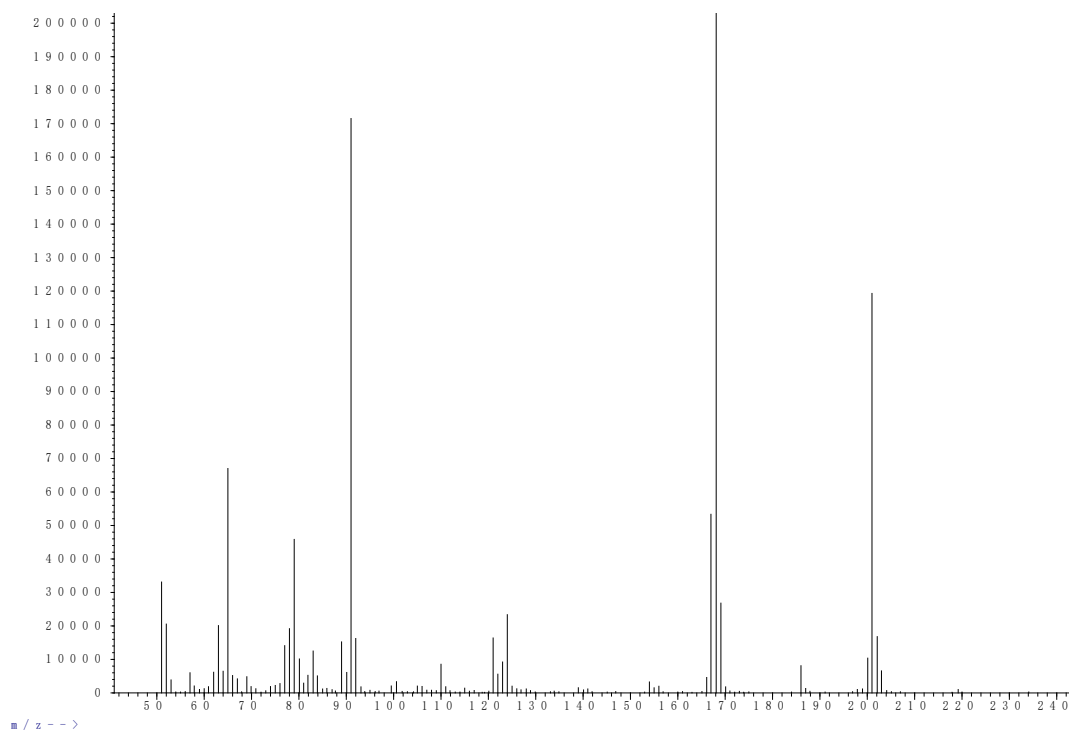

### 3.1.2 The reaction of **1a** and **2a** using 1,1-diphenylethene (**7b**) as the radical trapping reagent (eq. 2 in the main text)

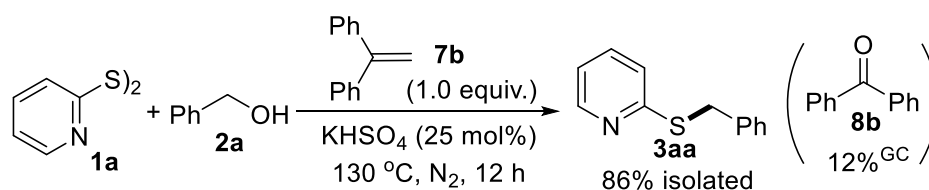

**Detailed Procedure:** The mixture of di(pyridin-2-yl)disulfide **1a** (82.5 mg, 0.375 mmol), benzyl alcohol **2a** (54.0 mg, 0.50 mmol),  $\text{KHSO}_4$  (17.0 mg, 0.125 mmol, 25 mol%), and 1,1-diphenylethene **7b** (90.0 mg, 0.50 mmol, 1.0 equiv.) was directly sealed in a Schlenk tube (10 mL) under nitrogen, and then stirred at  $130\text{ }^\circ\text{C}$  for 12 h. The reaction mixture was analyzed by TLC/GC-MS, and then purified by flash column chromatography on silica gel using ethyl acetate and petroleum ether (0~ 1/50) as the eluent, giving **3aa** in 86% isolated yield.

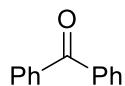

**Benzophenone (8b).** White solid.  $48 - 49\text{ }^\circ\text{C}$ .  $^1\text{H}$  NMR (600 MHz,  $\text{CDCl}_3$ )  $\delta$  7.85 – 7.74 (m, 4H), 7.62 – 7.55 (m, 2H), 7.50 – 7.44 (m, 4H);  $^{13}\text{C}$  NMR (150 MHz,  $\text{CDCl}_3$ )  $\delta$  196.9, 137.7, 132.5, 130.2, 128.4. This compound was known: Yang, X.-J.; Zheng, Y.-W.; Zheng, L.-Q.; Wu, L.-Z.; Tung, C.-H.; Chen, B. *Green Chem.* **2019**, *21*, 1401.

### GC Spectra

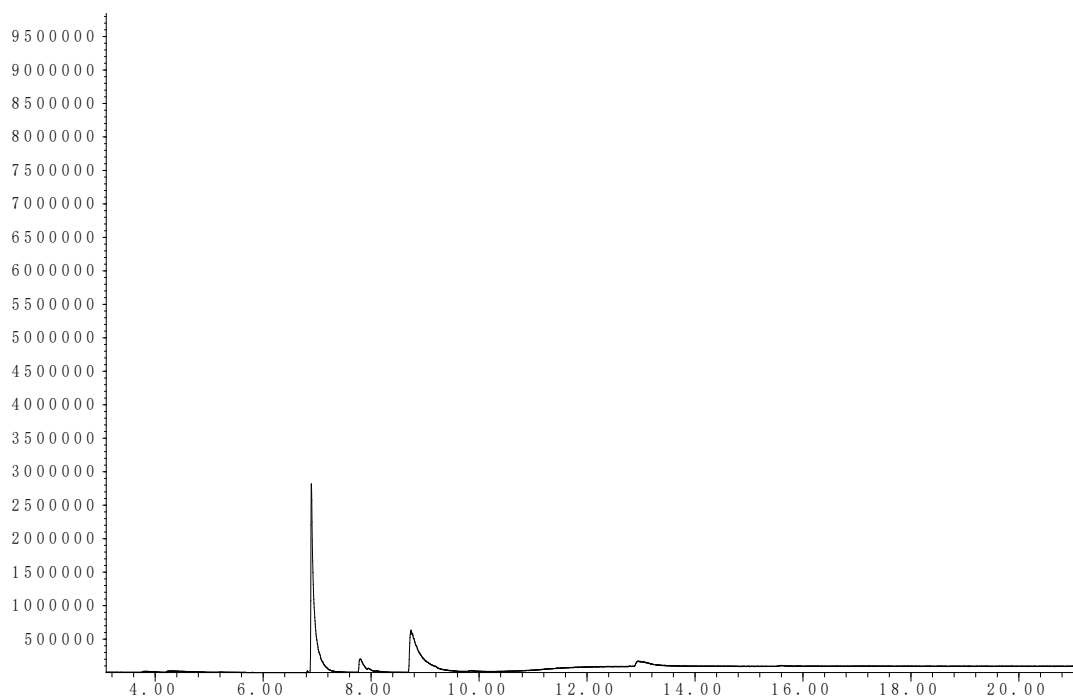

| Run | Time /min | Start scanning | Peak scanning | Stop scanning | Peak type | Hight   | Correction area | Correction maximum% | Total%        |
|-----|-----------|----------------|---------------|---------------|-----------|---------|-----------------|---------------------|---------------|
| 1   | 6.993     | 811            | 818           | 899           | M         | 2846164 | 118361192       | 100.00              | <b>88.137</b> |
| 2   | 7.821     | 1001           | 1013          | 1072          | M2        | 201943  | 15931163        | 13.46               | <b>11.863</b> |

### MS Spectra

T = 6.993 min, m/z = 180,

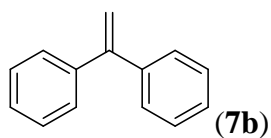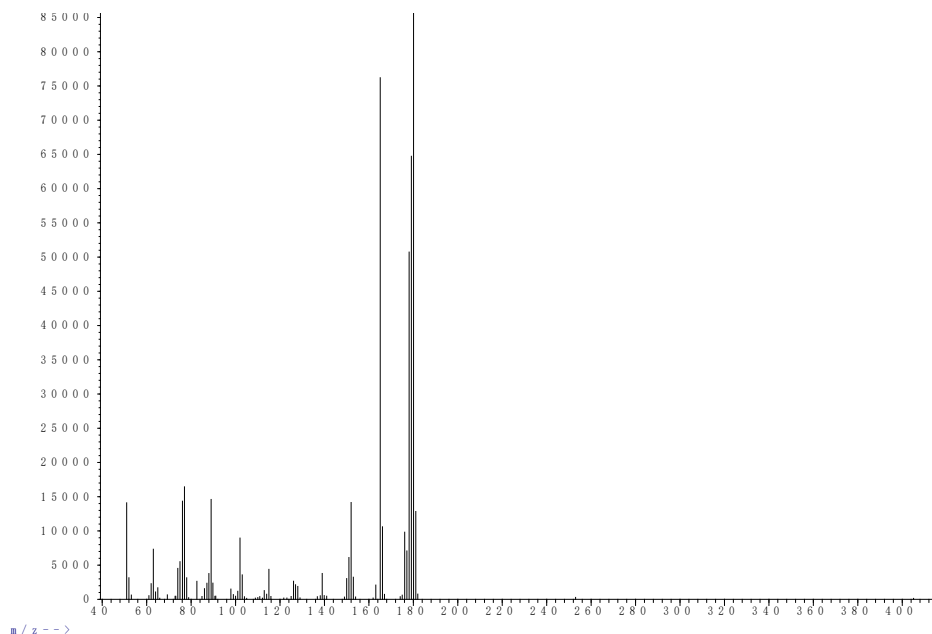

T = 7.821 min, m/z = 182,

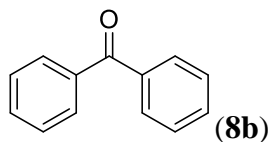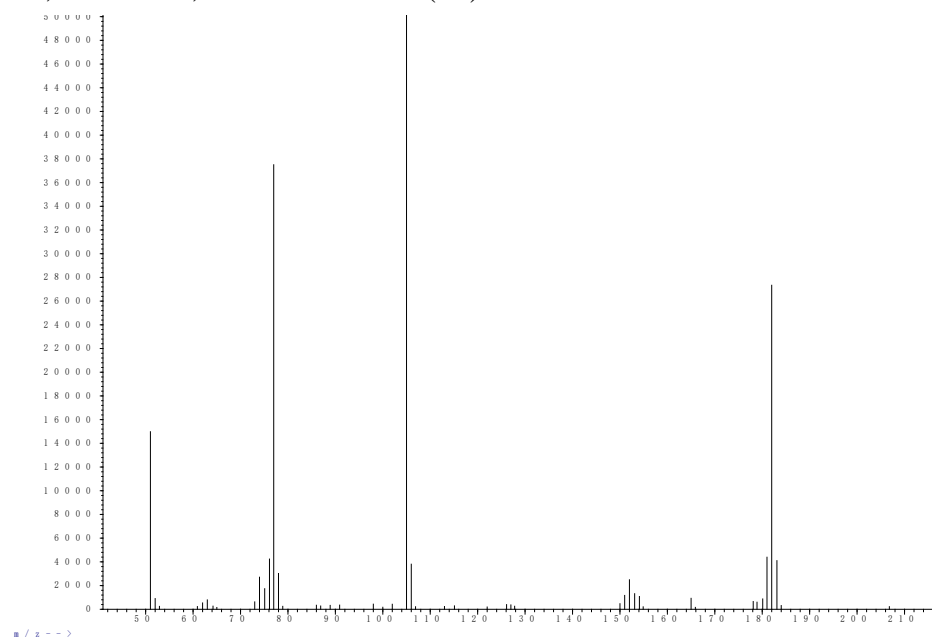

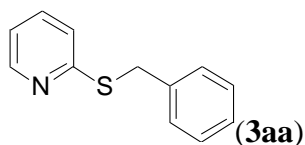

T = 8.776 min, m/z = 201,

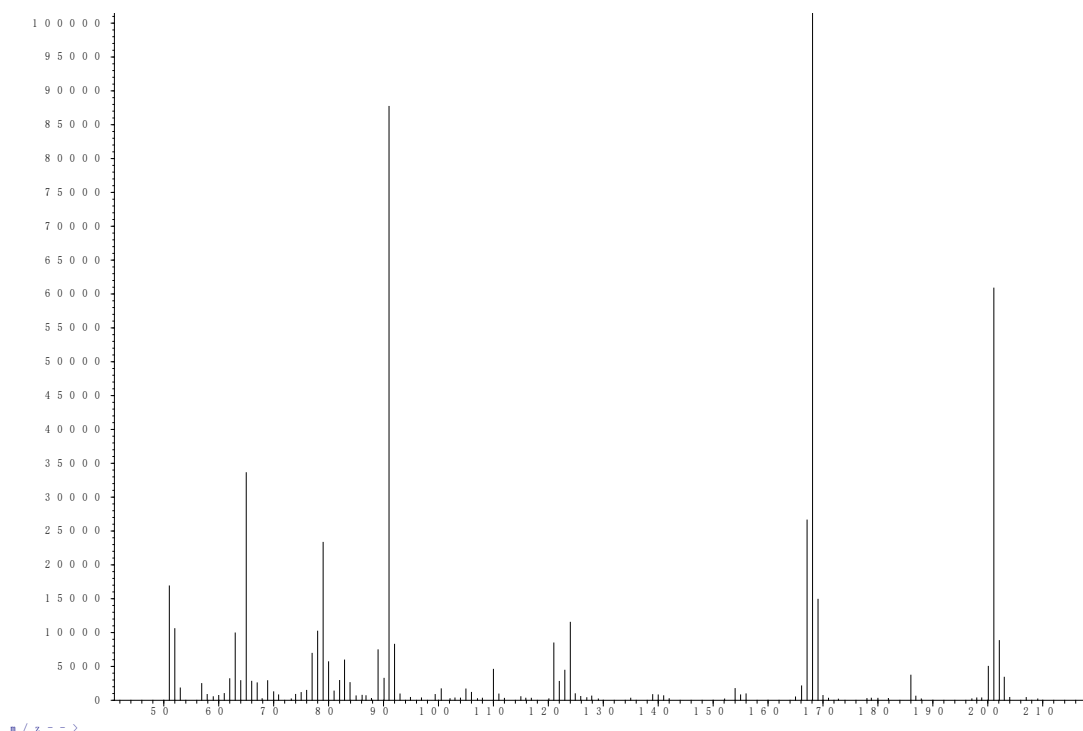

### 3.1.3 Results and Discussion

When 3,5-di-*t*-butyl 4-hydroxyl toluene (BHT, **7a**) or 1,1-diphenylethene (**7b**) was added to the model reaction of **1a** and **2a**, the target product **3aa** could still be obtained in good yields. Therefore, the reaction should not proceed via the formation of radical intermediates by homolytic cleavage of the S-S bond, but more likely the heterolytic cleavage of the S-S bond to give thiol cation (RS<sup>+</sup>) and thiol (RSH) intermediates in the presence of the acid catalyst. Besides, certain amounts of 2,6-di-*tert*-butyl-4-methylenecyclohexa-2,5-dien-1-one (**8a**) and benzophenone (**8b**), the oxidation products of **7a** and **7b**, were also observed by GC-MS analysis of these reactions. This may indicate that, certain oxidizing species may be generated in the reaction that can oxidize **7a** and **7b** to **8a** and **8b**.

## 3.2 Determination of possible intermediates by isotope labeling experiments

### 3.2.1 Certificate of analysis of the purchased H<sub>2</sub><sup>18</sup>O (98 atom% <sup>18</sup>O)

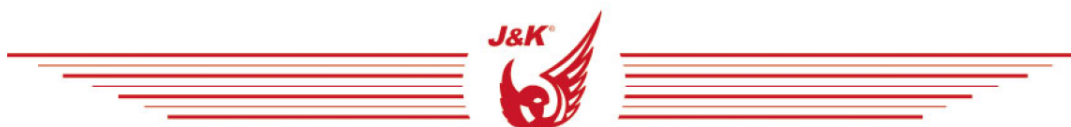

## CERTIFICATE OF ANALYSIS

|                   |                                                         |            |                         |
|-------------------|---------------------------------------------------------|------------|-------------------------|
| Catalog No.       | : 204174                                                | Lot Number | : LN30U38               |
| Product Name      | : Water- <sup>18</sup> O, N/A, 90 atom% <sup>18</sup> O |            |                         |
| CAS               | : 14314-42-2                                            |            |                         |
| Version           | : 1.2                                                   |            |                         |
| Molecular Formula | : H <sub>2</sub> <sup>18</sup> O                        |            |                         |
| Molecular Weight  | : 20.02                                                 |            | Issue Date : 2020-03-23 |

Appearance : Clear colorless liquid  
 Assay : 98.32 atom % 18O

Issued by QC Manager

*Nancy*

This is the computer generated page without signature.

### 3.2.2 The reaction of 1a, 2a and 7b in the presence of <sup>18</sup>O-H<sub>2</sub>O (98 atom% <sup>18</sup>O) (eq. 3 in the main text)

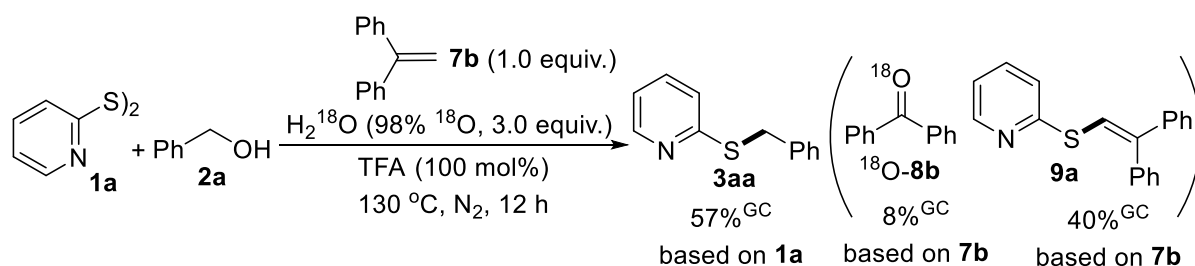

**Detailed Procedure:** The mixture of di(pyridin-2-yl)disulfide **1a** (82.5 mg, 0.375 mmol), benzyl alcohol **2a** (54.0 mg, 0.50 mmol), 1,1-diphenylethene **7b** (90.0 mg, 0.50 mmol, 1.0 equiv.), TFA (57.0 mg, 0.50 mmol, 1.0 equiv.), and H<sub>2</sub><sup>18</sup>O (98 atom% <sup>18</sup>O, 27.0 mg, 1.5 mmol, 3.0 equiv.) was directly sealed in a Schlenk tube (10 mL) under nitrogen, and then stirred at 130 °C for 12 h. The reaction mixture was then analyzed by GC-MS.



## GC Spectra

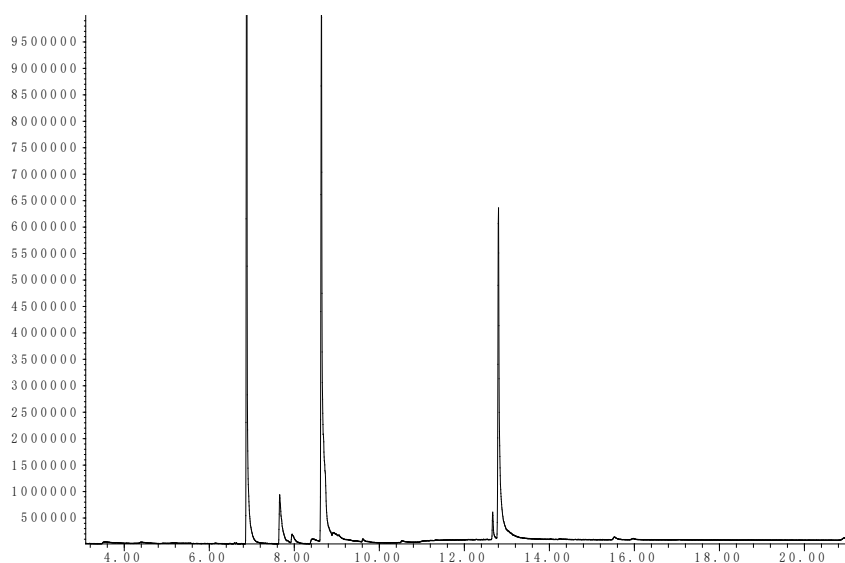

| Run | Time /min | Start scanning | Peak scanning | Stop scanning | Peak type | Hight    | Correction area | Correction maximum% | Total%        |
|-----|-----------|----------------|---------------|---------------|-----------|----------|-----------------|---------------------|---------------|
| 1   | 6.899     | 802            | 815           | 866           | M         | 17887132 | 260324586       | 100.00              | <b>52.156</b> |
| 2   | 7.695     | 967            | 981           | 1020          | M         | 942556   | 39770227        | 15.28               | <b>7.968</b>  |
| 3   | 12.830    | 2073           | 2087          | 2235          | M         | 6320215  | 199032156       | 76.46               | <b>39.876</b> |

## MS Spectra

T = 6.899 min, m/z = 180,

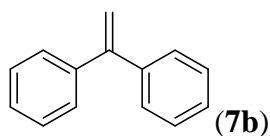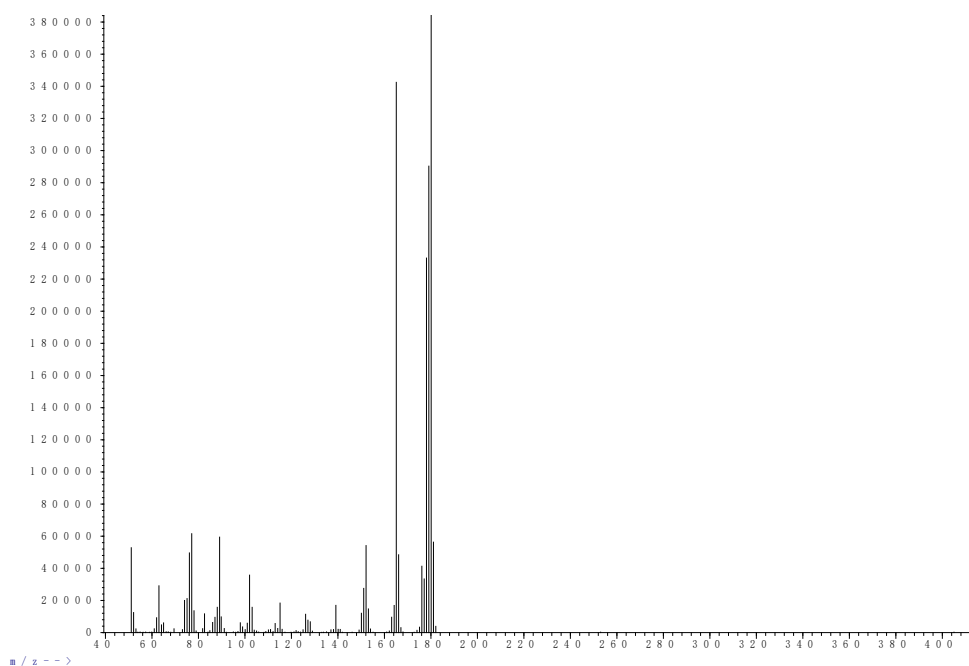

T = 7.695 min, m/z = 184,

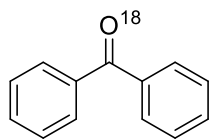

( $^{18}\text{O}$ -8b)

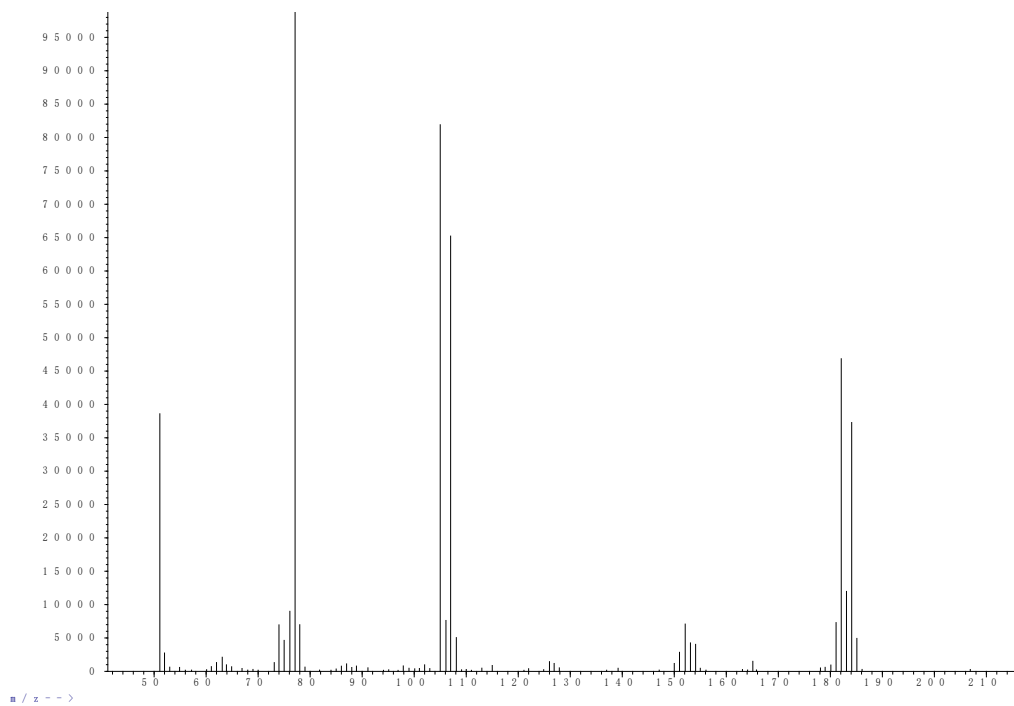

T = 8.650 min, m/z = 201,

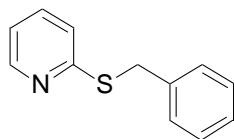

(3aa)

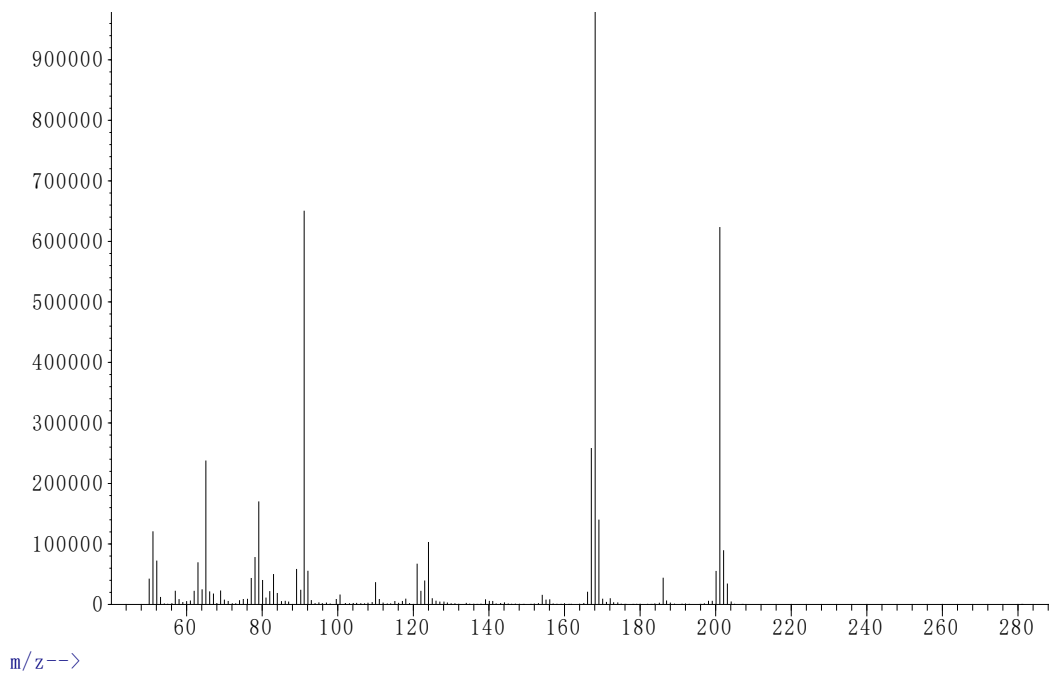

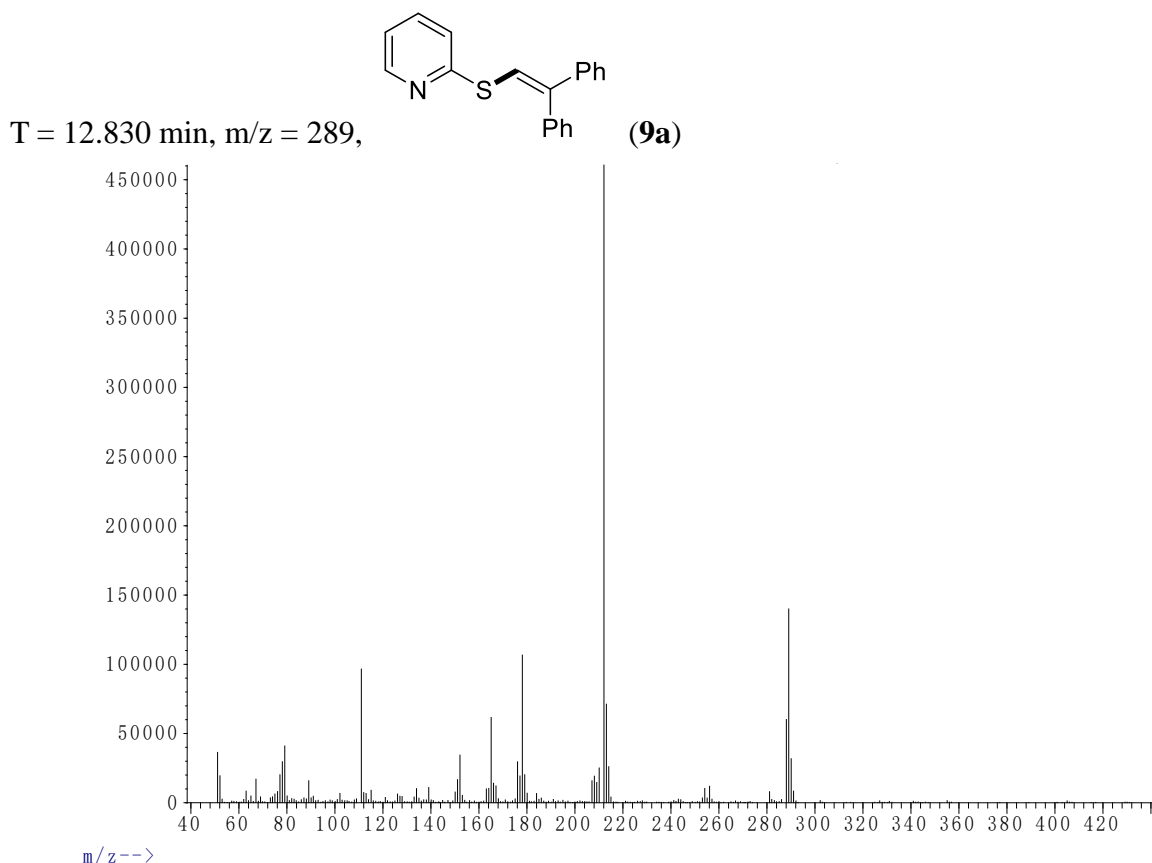

**Results and Discussion:** The observed **9a** should be generated by an electrophilic reaction of 2-pyridylthiol cation 2-PyS<sup>+</sup> (**10a**) with alkene **7b**, implying that the reaction should proceed *via* the formation of 2-PyS<sup>+</sup> (**10a**) and RSH intermediates by heterolytic cleavage of S-S bond of **1a**. Besides, <sup>18</sup>O-**8b** that may be generated from the oxidation of **7b** was also detected by GC-MS, suggesting that certain oxidizing species (containing <sup>18</sup>O) was generated from <sup>18</sup>O-H<sub>2</sub>O in the reaction.

### 3.2.3 The reaction of **1a** and **7b** in the presence of <sup>18</sup>O-H<sub>2</sub>O (98% <sup>18</sup>O) (eq. 4 in the main text)

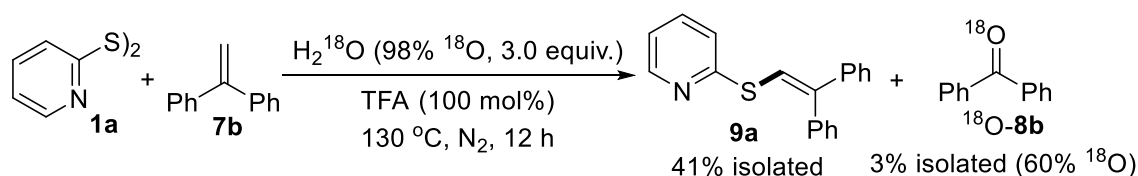

**Detailed Procedure:** The mixture of di(pyridin-2-yl)disulfide **1a** (82.5 mg, 0.375 mmol), 1,1-diphenylethene **7b** (90.0 mg, 0.50 mmol, 1.0 equiv.), TFA (57.0 mg, 0.50 mmol, 1.0 equiv.), and H<sub>2</sub><sup>18</sup>O (98 atom % <sup>18</sup>O, 27.0 mg, 1.5 mmol, 3.0 equiv.) was directly sealed in a Schlenk tube (10 mL) under nitrogen, and stirred at 130 °C for 12 h. The reaction mixture was then analyzed by GC-MS and purified by flash column chromatography on silica gel using ethyl acetate and petroleum ether (0~ 1/20) as the eluent, giving **9a** and <sup>18</sup>O-**8b** in 41% and 3% isolated yield, respectively. Then the isotope analysis of the product <sup>18</sup>O-**8b** by HRMS showed that <sup>18</sup>O-**8b**

should contain 60 atom%  $^{18}\text{O}$ .

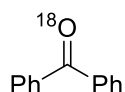

**Benzophenone ( $^{18}\text{O}$ -8b).** White solid. 48 – 49 °C.  $^1\text{H}$  NMR (600 MHz,  $\text{CDCl}_3$ )  $\delta$  7.83 – 7.77 (m, 4H), 7.62 – 7.55 (m, 2H), 7.52 – 7.46 (m, 4H);  $^{13}\text{C}$  NMR (150 MHz,  $\text{CDCl}_3$ )  $\delta$  196.9, 137.7, 132.5, 130.2, 128.4. HRMS (EI) for  $\text{C}_{13}\text{H}_{10}^{18}\text{O}$  (M) Calcd: 184.0774; found: 184.0772.

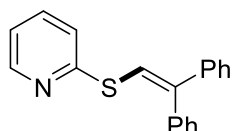

**2-((2,2-Diphenylvinyl)thio)pyridine (9a).** Colorless oil.  $^1\text{H}$  NMR (600 MHz,  $\text{CDCl}_3$ )  $\delta$  8.50 (dd,  $J = 4.8, 1.8$  Hz, 1H), 7.75 (s, 1H), 7.52 – 7.48 (m, 1H), 7.42 (dd,  $J = 8.4, 6.0$  Hz, 2H), 7.40 – 7.32 (m, 2H), 7.36 – 7.30 (m, 3H), 7.30 (dd,  $J = 8.4, 6.6$  Hz, 2H), 7.26 – 7.24 (m, 1H), 7.19 – 7.17 (m, 1H), 7.06 – 7.03 (m, 1H);  $^{13}\text{C}$  NMR (150 MHz,  $\text{CDCl}_3$ )  $\delta$  157.3, 149.8, 141.5, 140.4, 139.9, 136.5, 129.8, 128.6, 128.4, 127.9, 127.4, 122.6, 120.4, 119.6. HRMS (ESI) for  $\text{C}_{19}\text{H}_{16}\text{NS}$  (M+H) Calcd: 290.1003; found: 290.1031. Chen, Y.; Wen, S.; Tian, Q.; Zhang, Y.; Cheng, G. *Org. Lett.* **2021**, *23*, 7905.

## GC Spectra

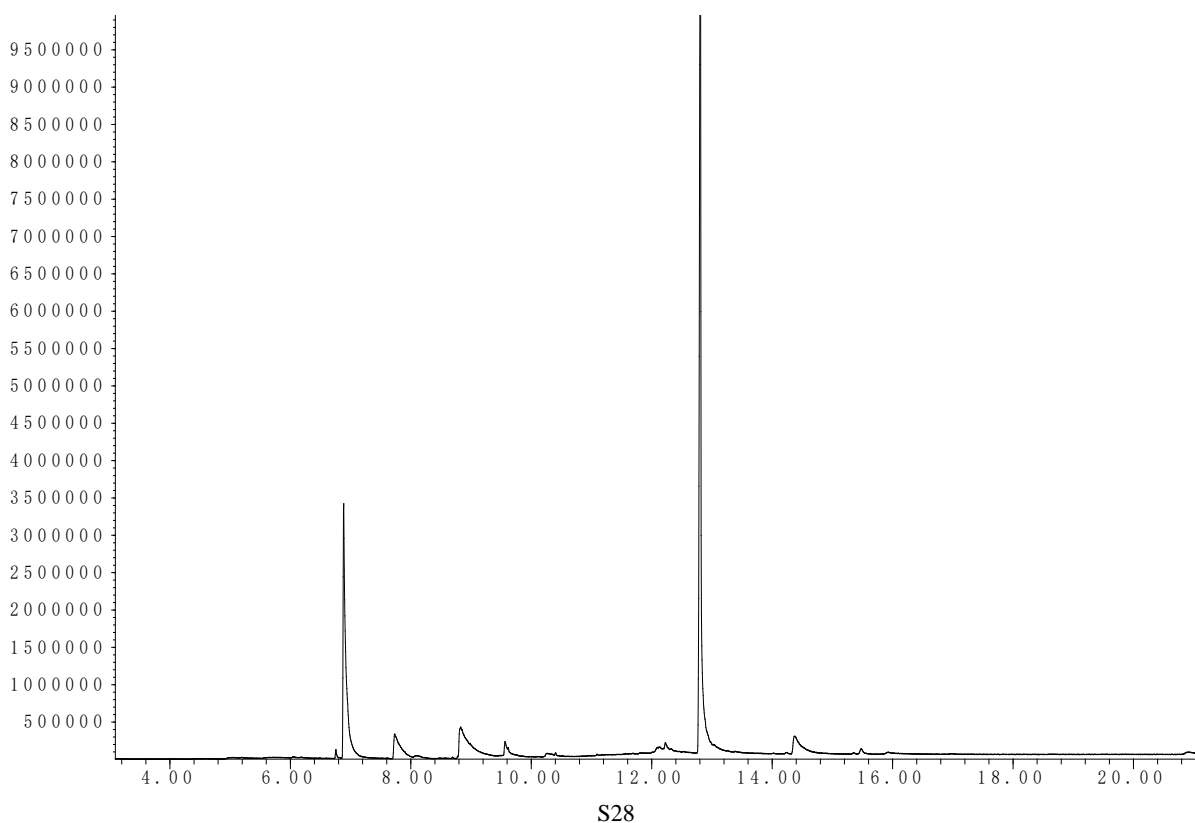

| Run | Time   | Start    | Peak     | Stop     | Peak | Hight    | Correction | Correction | Total%        |
|-----|--------|----------|----------|----------|------|----------|------------|------------|---------------|
|     | /min   | scanning | scanning | scanning | type |          | area       | maximum%   |               |
| 1   | 6.914  | 805      | 817      | 859      | M    | 27958514 | 430645500  | 65.24      | <b>38.211</b> |
| 2   | 7.776  | 963      | 982      | 1020     | M    | 786300   | 36222224   | 5.49       | <b>3.214</b>  |
| 3   | 12.849 | 2063     | 2096     | 2131     | M    | 21851283 | 660138794  | 100.00     | <b>39.876</b> |

## MS Spectra

T = 6.914 min, m/z = 180, 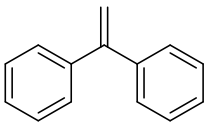 (7b)

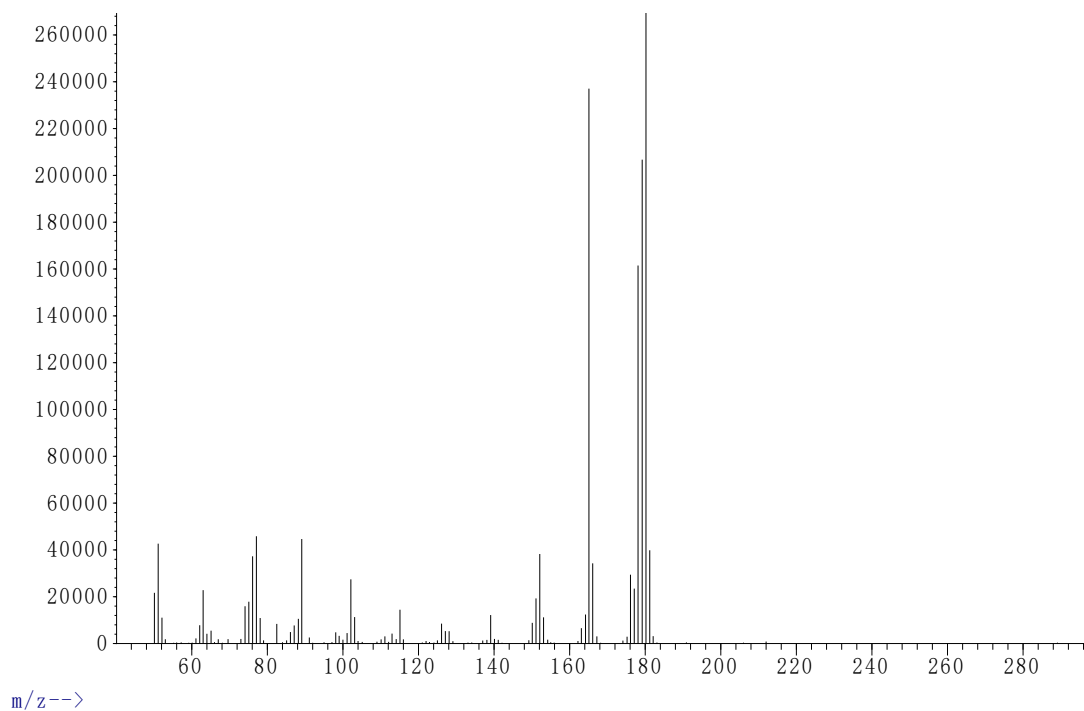

T = 7.776 min, m/z = 184,



( $^{18}\text{O}$ -8b)

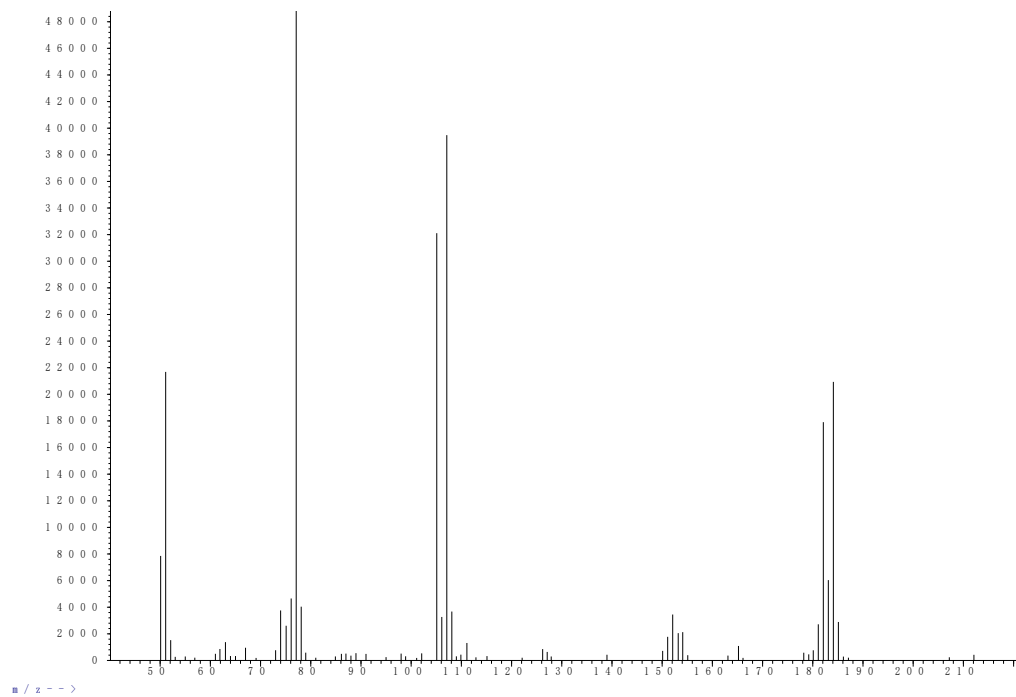

T = 12.849 min, m/z = 289,

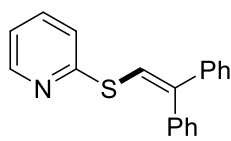

(9a)

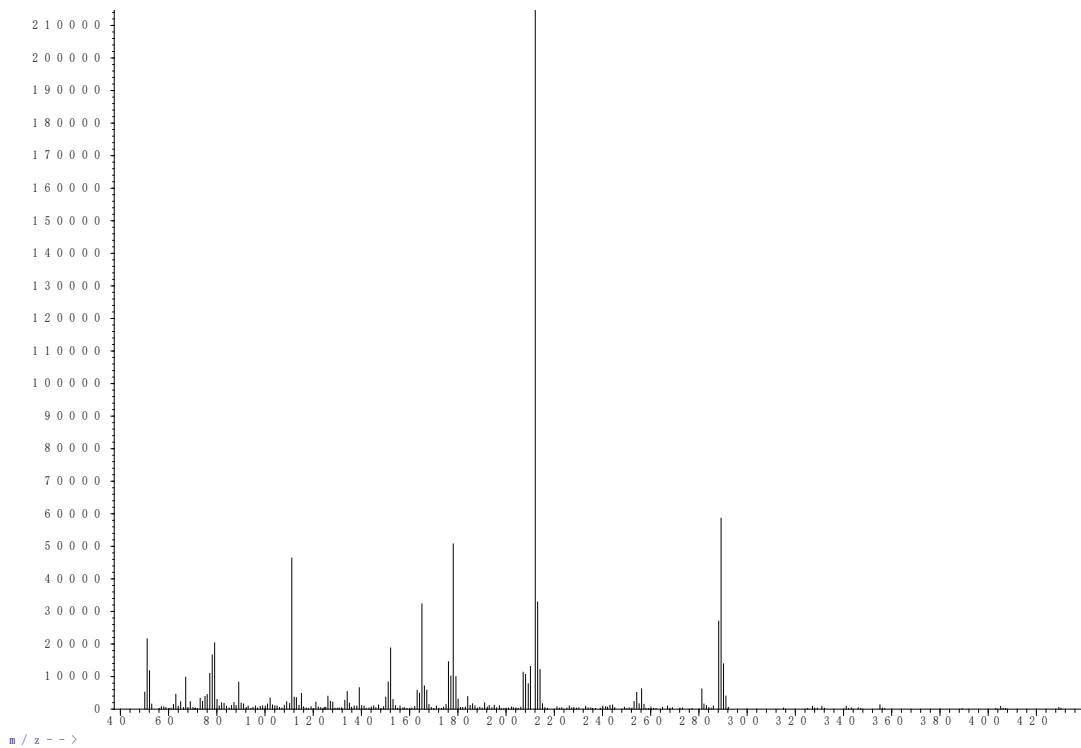

## Isotope analysis of the obtained $^{18}\text{O}$ -**8b** by HRMS

### Elemental Composition Report

Page 1

#### Multiple Mass Analysis: 2 mass(es) processed

Tolerance = 1.0 mDa / DBE: min = -1.5, max = 50.0

Element prediction: Off

Monoisotopic Mass, Odd and Even Electron Ions

156 formula(e) evaluated with 2 results within limits (up to 70 best isotopic matches for each mass)

Elements Used:

C: 0-50 H: 0-100 16O: 0-5 18O: 0-5

CXK-1460 (2.639)

TOF MS EI+

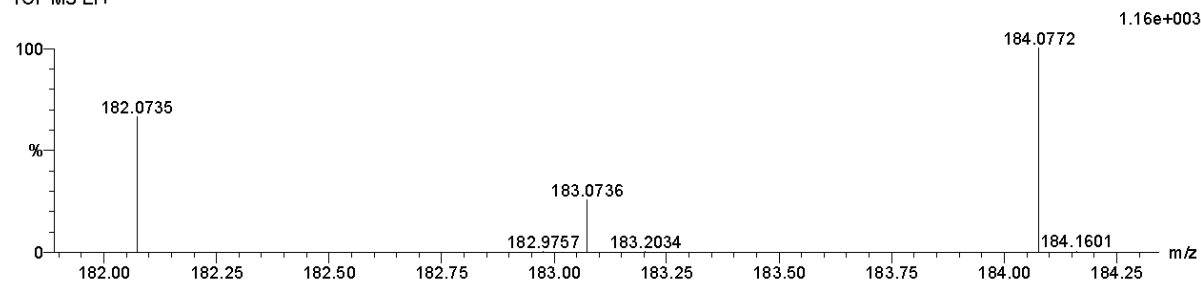

|          |        |            |      |      |      |           |             |  |
|----------|--------|------------|------|------|------|-----------|-------------|--|
| Minimum: | 30.00  |            |      |      | -1.5 |           |             |  |
| Maximum: | 100.00 |            | 1.0  | 10.0 | 50.0 |           |             |  |
| Mass     | RA     | Calc. Mass | mDa  | PPM  | DBE  | i-FIT     | Formula     |  |
| 182.0735 | 66.35  | 182.0732   | 0.3  | 1.6  | 9.0  | 623.4     | C13 H10 160 |  |
| 184.0772 | 100.00 | 184.0774   | -0.2 | -1.1 | 9.0  | 2773464.3 | C13 H10 180 |  |

**Results and Discussion:** Observation of **9a** in the reaction confirmed again the possibility of heterolytic cleavage of **1a** to generate 2-PyS<sup>+</sup> (**10a**) under the acid-catalyzed conditions. Moreover,  $^{18}\text{O}$ -**8b** was detected, isolated and determined to be containing 60 atom%  $^{18}\text{O}$  by HRMS analysis, suggesting that certain oxidizing species (containing  $^{18}\text{O}$ , possibly  $\text{H}_2^{18}\text{O}_2$ ) may be generated from the reaction of  $^{18}\text{O}$ - $\text{H}_2\text{O}$  with **1a** or 2-PyS<sup>+</sup> (**10a**), but more possibly **10a** because no reaction can occur without the acid catalyst.

### 3.2.4 Control reaction of lone **7b** with $^{18}\text{O}$ - $\text{H}_2\text{O}$ (eq. 5 in the main text)

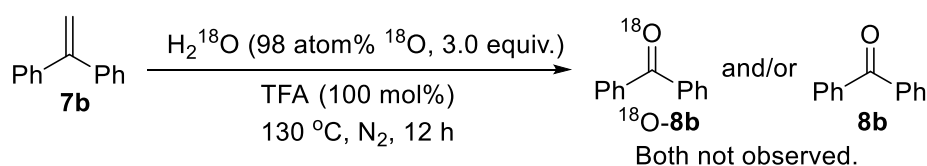

**Detailed Procedure:** The mixture of 1,1-diphenylethene **7b** (90.0 mg, 0.50 mmol, 1.0 equiv.), TFA (57.0 mg, 0.50 mmol, 1.0 equiv.), and  $\text{H}_2^{18}\text{O}$  (98 atom%  $^{18}\text{O}$ , 27.0 mg, 1.5 mmol, 3.0 equiv.) was directly sealed in a Schlenk tube (1 mL) under nitrogen, and then stirred at 130 °C for 12 h. The reaction mixture was analyzed by GC-MS, showing no **8b** was produced.

## GC Spectra

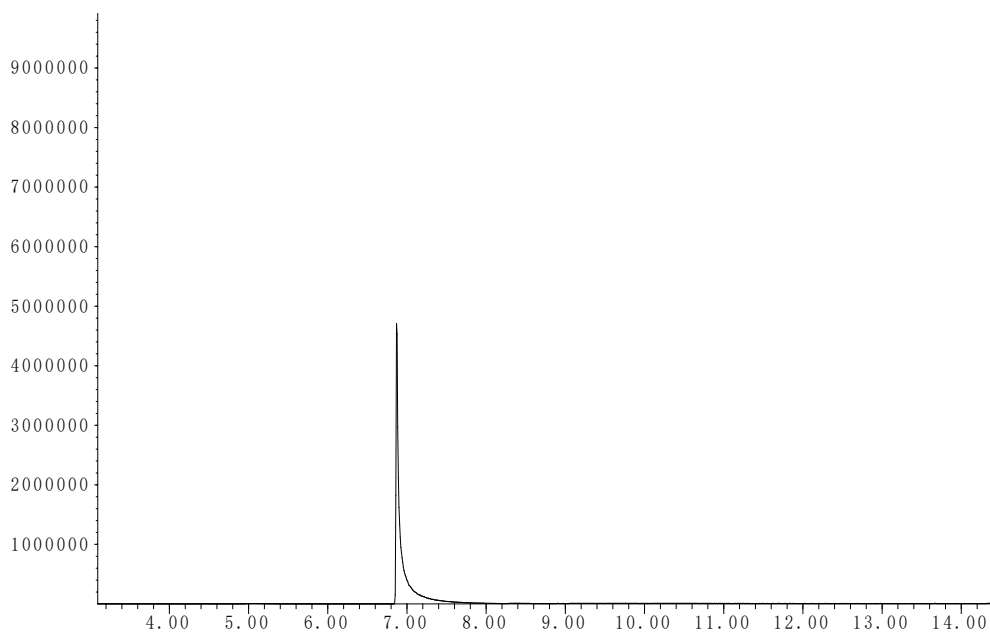

| Run | Time  | Start    | Peak     | Stop     | Peak | Height  | Correction | Correction | Total%         |
|-----|-------|----------|----------|----------|------|---------|------------|------------|----------------|
|     | /min  | scanning | scanning | scanning | type |         | area       | maximum%   |                |
| 1   | 6.871 | 475      | 478      | 512      | M    | 5006000 | 148767287  | 100.00     | <b>100.000</b> |

## MS Spectra

T = 6.907 min, m/z = 180,

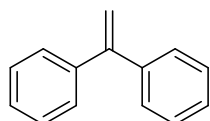

(7b)

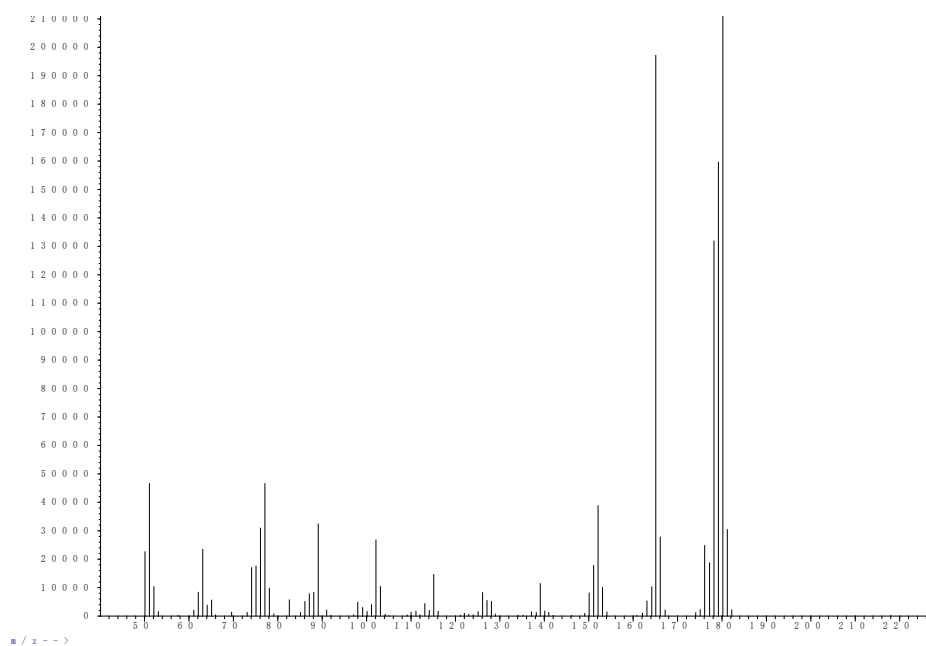



**Results and Discussion:** In the absence of **1a**, 1,1-diphenylethene **7b** cannot be oxidized to **8b**. Therefore, under the **1a**-free conditions, the potential oxidizing species (containing  $^{18}\text{O}$ , possibly hydrogen peroxide  $\text{H}_2^{18}\text{O}_2$ ) could not be generated from  $^{18}\text{O}\text{-H}_2\text{O}$ . Ultimately, no **8b** could be generated from **7a**.

### 3.2.5 Control reaction of 1,1-diphenylethene (**7b**) with external $\text{H}_2\text{O}_2$ (eq. 6 in the main text)

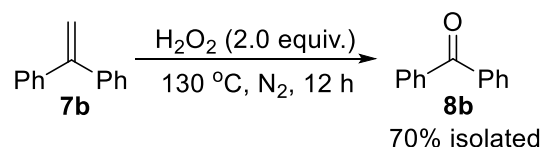

**Detailed Procedure:** The mixture of 1,1-diphenylethene **7b** (90.0 mg, 0.50 mmol, 1.0 equiv.) and  $\text{H}_2\text{O}_2$  (100 mg, 1.0 mmol, 30 W/W%, 2.0 equiv.) was directly sealed in a Schlenk tube (1 mL) under nitrogen, and then stirred at 130 °C for 12 h. The reaction mixture was analyzed by GC-MS and purified by flash column chromatography on silica gel using ethyl acetate and petroleum ether (0~ 1/20) as the eluent, giving **8b** in 70% isolated yield.

### GC Spectra

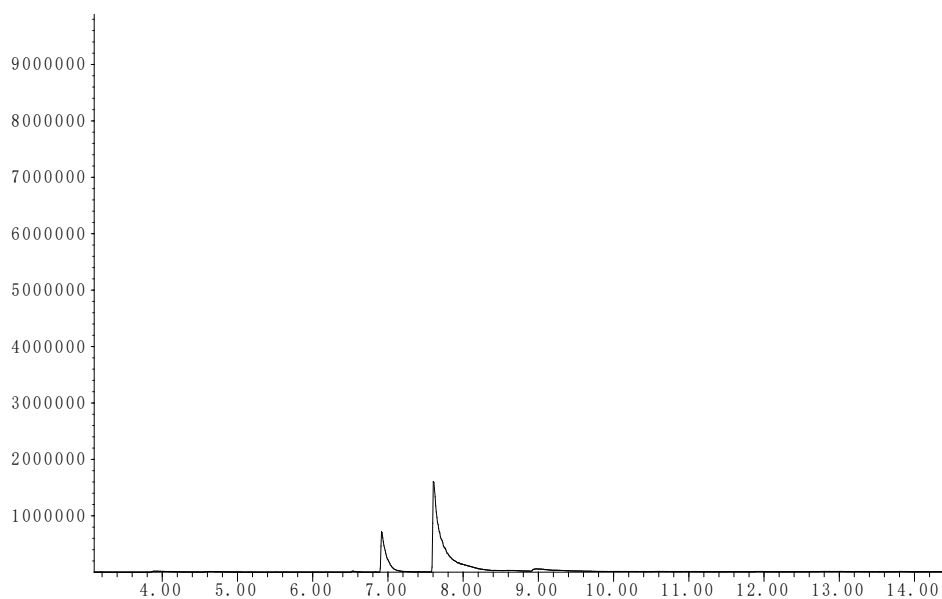

| Run | Time /min | Start scanning | Peak scanning | Stop scanning | Peak type | Height  | Correction area | Correction maximum% | Total%        |
|-----|-----------|----------------|---------------|---------------|-----------|---------|-----------------|---------------------|---------------|
| 1   | 6.939     | 478            | 484           | 510           | M         | 742092  | 33350179        | 24.94               | <b>19.964</b> |
| 2   | 7.651     | 567            | 571           | 650           | M         | 1691586 | 133697340       | 100.00              | <b>80.036</b> |

## MS Spectra

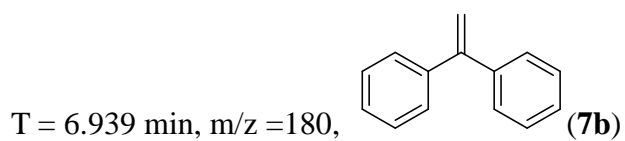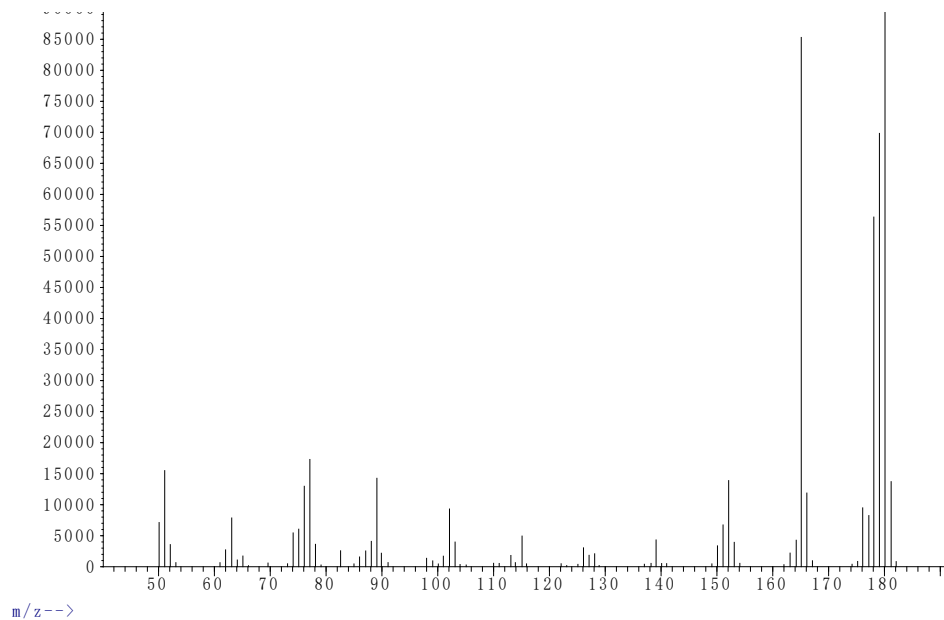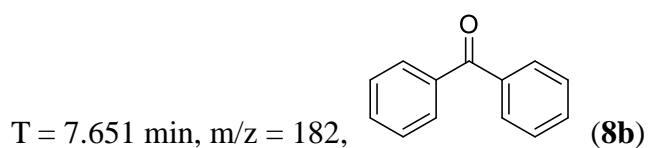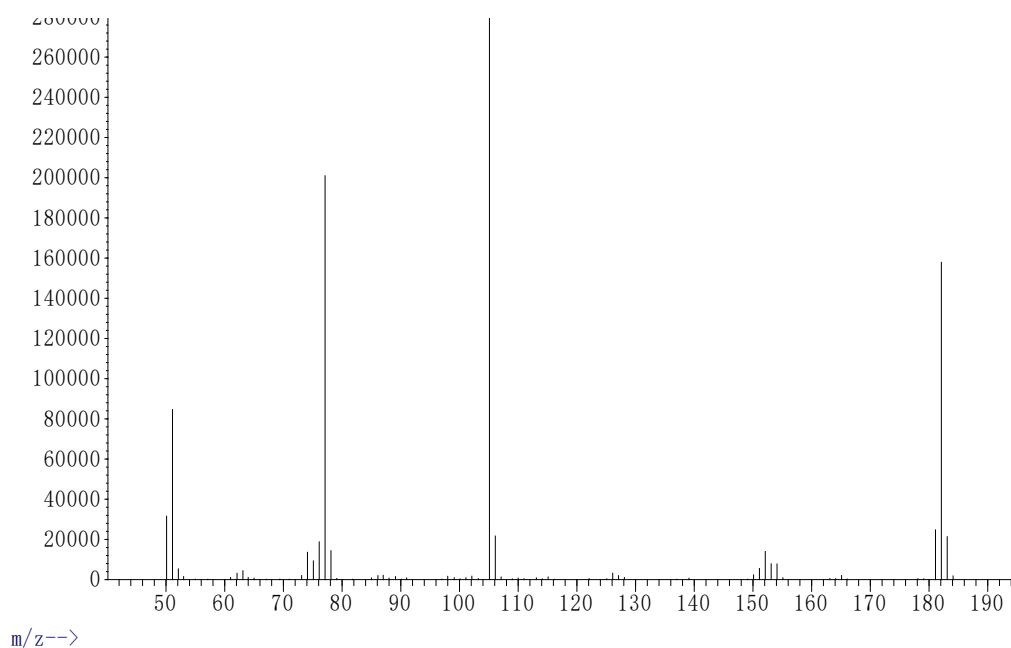

**Results and Discussion:** The reaction of **7b** with H<sub>2</sub>O<sub>2</sub> could effectively afford **8b** in 70% isolated yield, suggesting that H<sub>2</sub>O<sub>2</sub> should be the most possible active oxidizing species generated through the oxidation of H<sub>2</sub>O.

### 3.3 ESI-HRMS analysis of the key intermediates (eq. 7 in the main text)

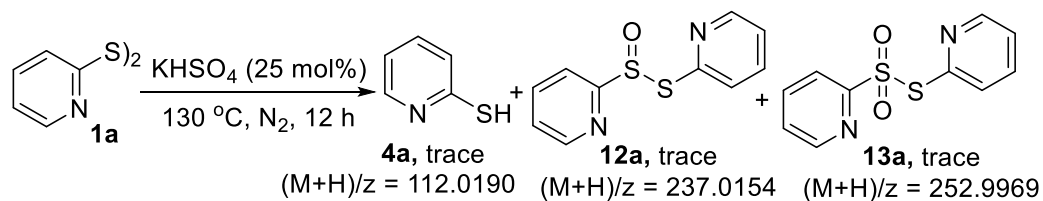

**Detailed Procedure:** The mixture of di(pyridin-2-yl)disulfide **1a** (82.5 mg, 0.375 mmol) and  $\text{KHSO}_4$  (17.0 mg, 0.125 mmol, 25 mol%) was directly sealed in a Schlenk tube (10 mL) under nitrogen, and stirred at 130 °C for 2 h. The reaction mixture was then analyzed by ESI-HRMS.

HRMS Spectra of 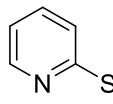 (**4a**)

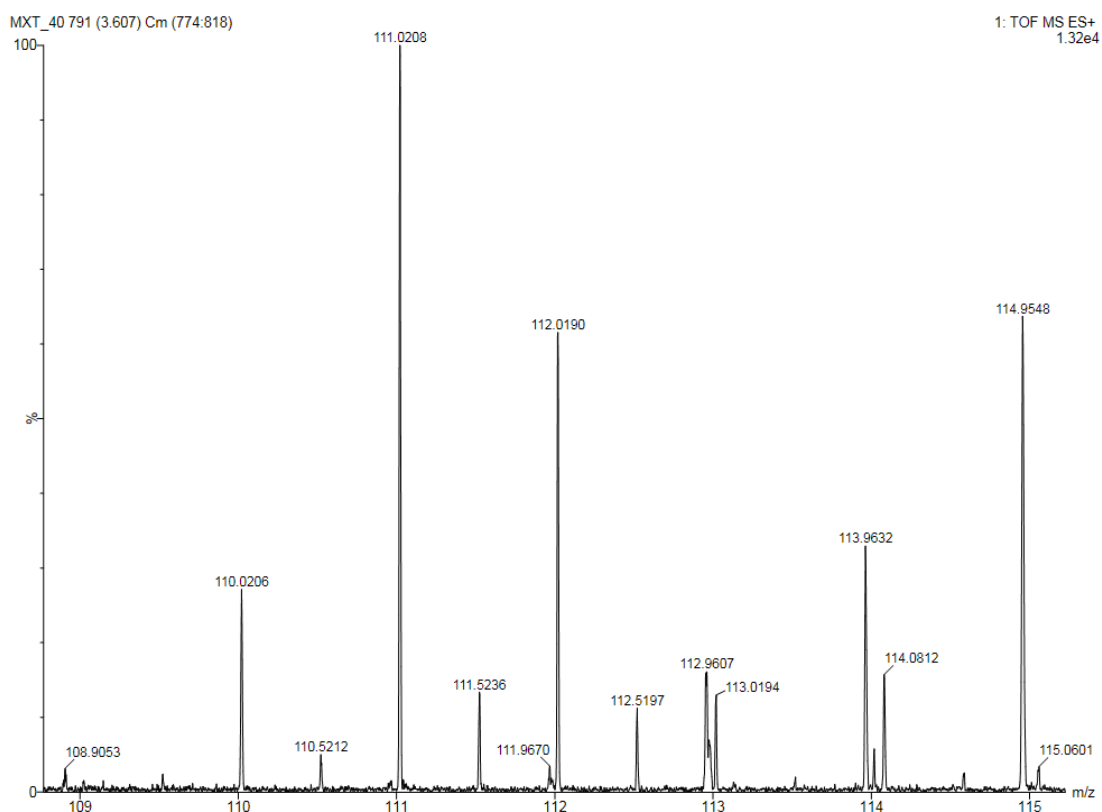

HRMS Spectra of C1=CC=C(C=C1)S(=O)(=O)N2=CC=CC=C2 (12a)

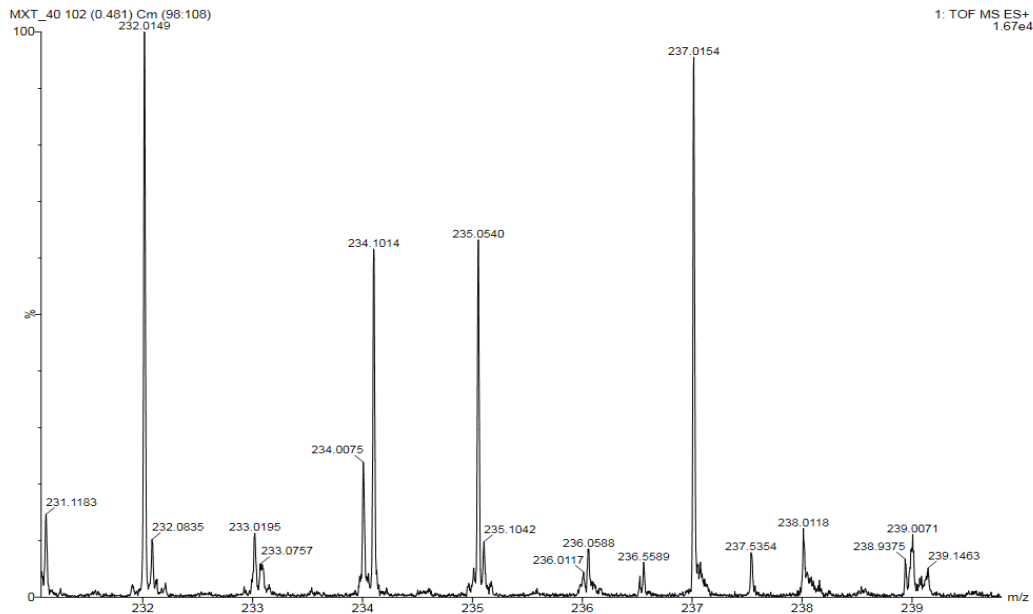

HRMS Spectra of C1=CC=C(C=C1)S(=O)(=O)N2=CC=CC=C2 (13a)

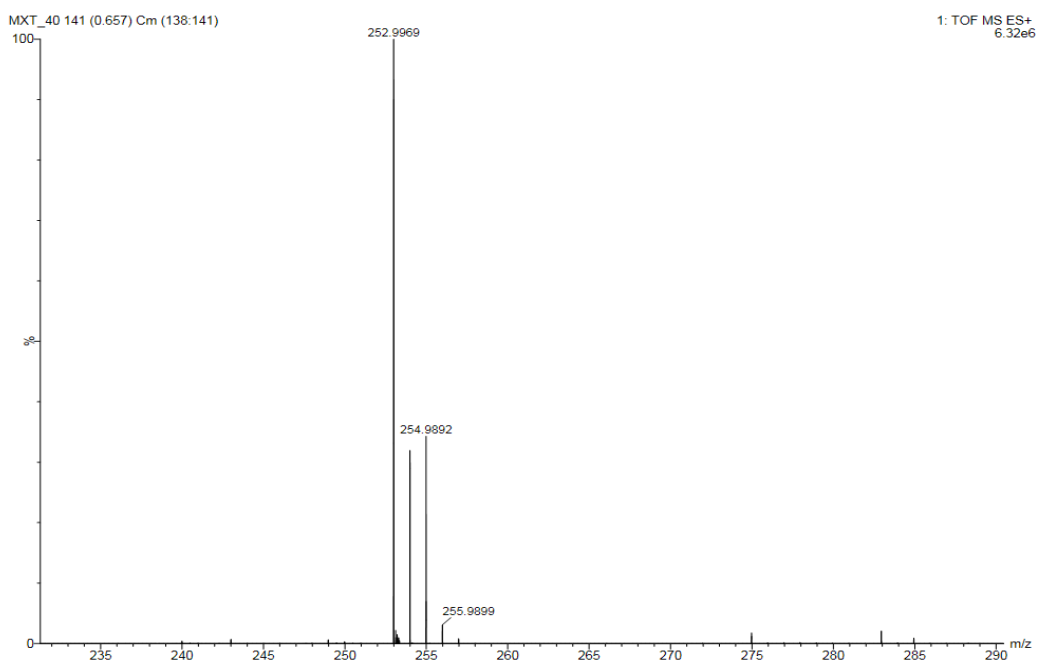

**Results and Discussion:** HRMS analysis of the  $\text{KHSO}_4$ -catalyzed blank reaction of **1a** showed the generation of trace yields of 2-PySH (**4a**), thiosulfinate **12a**, and thiosulfonate **13a**. Clearly, the production of **4a** confirmed again the heterolytic cleavage of S-S bond by acid catalysis; whereas, as shown by the scheme below, **12a** and **13a** are in effect the characteristic products of the stepwise disproportionation reactions of sulfenic acids 2-PySOH (**11a**), implying that **11a** were most possibly generated in the process by the reaction of 2-PyS<sup>+</sup> (**10a**) with water.

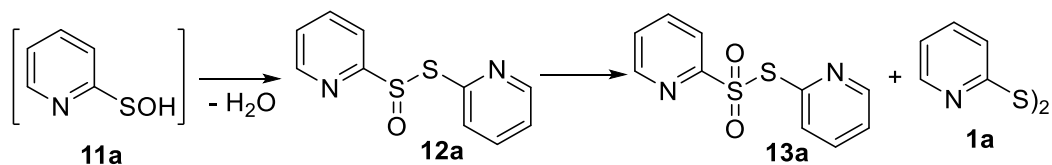

## 4. Density Functional Theory (DFT) Calculation Studies

Summary table for the Key Intermediates

| Run | Structure                | $E_0$        | $H_{298}$    | $G_{298}$    | TCGFE    |
|-----|--------------------------|--------------|--------------|--------------|----------|
| 1   | <b>1a</b>                | -1291.613503 | -1291.600528 | -1291.654395 | 0.119658 |
| 2   | <b>1a-H<sup>+</sup></b>  | -1291.982235 | -1291.969190 | -1292.022745 | 0.134138 |
| 3   | <b>1a-H<sup>+</sup>'</b> | -1291.933610 | -1291.920357 | -1291.975057 | 0.129341 |
| 4   | <b>TS1</b>               | -1291.939669 | -1291.926599 | -1291.982043 | 0.130527 |
| 5   | <b>TS1'</b>              | -1291.892567 | -1291.880150 | -1291.931988 | 0.128683 |
| 6   | <b>14a</b>               | -1291.947738 | -1291.935146 | -1291.987157 | 0.133704 |
| 7   | <b>14a'</b>              | -1291.896766 | -1291.883289 | -1291.939226 | 0.125765 |
| 8   | <b>15a</b>               | -1291.901210 | -1291.888228 | -1291.942367 | 0.130942 |
| 9   | <b>15a'</b>              | -1291.882636 | -1291.869193 | -1291.924361 | 0.125923 |
| 10  | <b>H<sub>2</sub>O</b>    | -76.387796   | -76.384017   | -76.405463   | 0.003499 |
| 11  | <b>4a'</b>               | -646.395183  | -646.388675  | -646.425041  | 0.062249 |
| 12  | <b>4a</b>                | -646.393999  | -646.387114  | -646.424095  | 0.057924 |
| 13  | <b>10a</b>               | -645.446506  | -645.439805  | -645.476846  | 0.048146 |
| 14  | <b>16a</b>               | -2013.554089 | -2013.532515 | -2013.607003 | 0.214234 |
| 15  | <b>16a'</b>              | -2013.525485 | -2013.502852 | -2013.583622 | 0.206703 |
| 16  | <b>17a</b>               | -2013.601334 | -2013.579662 | -2013.657573 | 0.213205 |
| 17  | <b>17a'</b>              | -2013.543597 | -2013.521720 | -2013.598451 | 0.211095 |
| 18  | <b>11a</b>               | -721.582802  | -721.574833  | -721.614898  | 0.061486 |
| 19  | <b>18a</b>               | -1443.186721 | -1443.170389 | -1443.232328 | 0.143947 |
| 20  | <b>19a</b>               | -1443.138418 | -1443.121379 | -1443.185181 | 0.143037 |

$E_0$ : Sum of electronic and zero-point Energies

$H_{298}$ : Sum of electronic and thermal Enthalpies

$G_{298}$ : Sum of electronic and thermal Free Energies

TCGFE: Thermal correction to Gibbs Free Energy

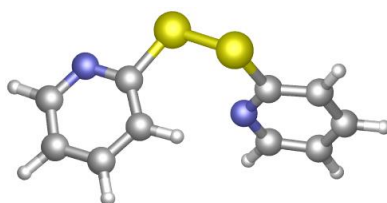

**1a**

Standard orientation:

| Center Number | Atomic Number | Atomic Type | Coordinates (Angstroms) |           |           |
|---------------|---------------|-------------|-------------------------|-----------|-----------|
|               |               |             | X                       | Y         | Z         |
| 1             | 6             | 0           | 3.975385                | 0.467485  | -0.541946 |
| 2             | 6             | 0           | 3.828909                | 1.459786  | 0.425665  |
| 3             | 6             | 0           | 2.621111                | 1.522867  | 1.124707  |
| 4             | 6             | 0           | 1.614528                | 0.605062  | 0.838998  |
| 5             | 6             | 0           | 1.882148                | -0.356851 | -0.140938 |
| 6             | 7             | 0           | 3.024486                | -0.432718 | -0.821761 |
| 7             | 1             | 0           | 2.459471                | 2.286482  | 1.881050  |
| 8             | 1             | 0           | 4.894243                | 0.381088  | -1.118743 |
| 9             | 1             | 0           | 4.633721                | 2.161266  | 0.621551  |
| 10            | 1             | 0           | 0.657878                | 0.637009  | 1.344090  |
| 11            | 16            | 0           | 0.733857                | -1.632276 | -0.694514 |
| 12            | 16            | 0           | -0.809156               | -1.661187 | 0.690276  |
| 13            | 6             | 0           | -1.926044               | -0.340618 | 0.163147  |
| 14            | 6             | 0           | -3.272547               | -0.445732 | 0.542095  |
| 15            | 6             | 0           | -4.127340               | 0.595863  | 0.194261  |
| 16            | 1             | 0           | -3.634233               | -1.318596 | 1.076862  |
| 17            | 6             | 0           | -2.266185               | 1.674987  | -0.855025 |
| 18            | 6             | 0           | -3.619729               | 1.682184  | -0.522823 |
| 19            | 1             | 0           | -5.178518               | 0.553091  | 0.466192  |
| 20            | 1             | 0           | -1.825654               | 2.496441  | -1.416615 |
| 21            | 1             | 0           | -4.255219               | 2.510155  | -0.820434 |
| 22            | 7             | 0           | -1.425671               | 0.689615  | -0.511809 |

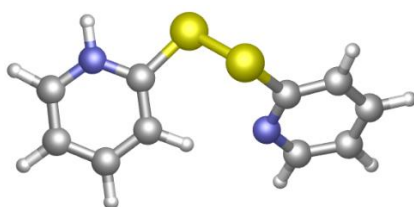

**1a-H<sup>+</sup>**

Standard orientation:

| Center Number | Atomic Number | Atomic Type | Coordinates (Angstroms) |           |           |
|---------------|---------------|-------------|-------------------------|-----------|-----------|
|               |               |             | X                       | Y         | Z         |
| 1             | 6             | 0           | 4.205267                | 0.168771  | -0.276127 |
| 2             | 6             | 0           | 3.986265                | 1.407889  | 0.285120  |
| 3             | 6             | 0           | 2.668957                | 1.781384  | 0.598693  |
| 4             | 6             | 0           | 1.605038                | 0.922711  | 0.341318  |
| 5             | 6             | 0           | 1.860491                | -0.330678 | -0.220332 |
| 6             | 7             | 0           | 3.151955                | -0.658636 | -0.498397 |
| 7             | 1             | 0           | 2.473750                | 2.758744  | 1.029442  |
| 8             | 1             | 0           | 5.181790                | -0.211479 | -0.551197 |
| 9             | 1             | 0           | 4.824445                | 2.068802  | 0.471617  |
| 10            | 1             | 0           | 0.568982                | 1.202795  | 0.518367  |
| 11            | 16            | 0           | 0.645897                | -1.544321 | -0.676385 |
| 12            | 16            | 0           | -0.747813               | -1.460619 | 0.883867  |
| 13            | 6             | 0           | -1.991113               | -0.296628 | 0.276280  |
| 14            | 6             | 0           | -3.317846               | -0.728832 | 0.219074  |
| 15            | 6             | 0           | -4.284893               | 0.205824  | -0.159394 |
| 16            | 1             | 0           | -3.581511               | -1.754688 | 0.452117  |
| 17            | 6             | 0           | -2.521960               | 1.813980  | -0.415055 |
| 18            | 6             | 0           | -3.881589               | 1.498258  | -0.487524 |
| 19            | 1             | 0           | -5.330599               | -0.081347 | -0.212435 |
| 20            | 1             | 0           | -2.167483               | 2.809051  | -0.671819 |
| 21            | 1             | 0           | -4.598909               | 2.250502  | -0.798257 |
| 22            | 7             | 0           | -1.587563               | 0.939417  | -0.023143 |
| 23            | 1             | 0           | 3.337748                | -1.584910 | -0.879075 |



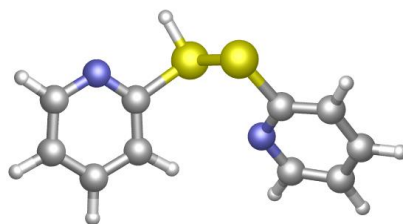

**1a-H<sup>+</sup>**

Standard orientation:

| Center Number | Atomic Number | Atomic Type | Coordinates (Angstroms) |           |           |
|---------------|---------------|-------------|-------------------------|-----------|-----------|
|               |               |             | X                       | Y         | Z         |
| 1             | 6             | 0           | -2.412326               | 1.639305  | -0.617475 |
| 2             | 6             | 0           | -3.731357               | 1.590317  | -0.170660 |
| 3             | 6             | 0           | -4.165368               | 0.451461  | 0.510260  |
| 4             | 6             | 0           | -3.276450               | -0.603901 | 0.719377  |
| 5             | 6             | 0           | -1.976103               | -0.431138 | 0.245359  |
| 6             | 7             | 0           | -1.535277               | 0.647066  | -0.395400 |
| 7             | 1             | 0           | -5.189690               | 0.373002  | 0.861145  |
| 8             | 1             | 0           | -2.033862               | 2.496935  | -1.166618 |
| 9             | 1             | 0           | -4.401409               | 2.421826  | -0.359652 |
| 10            | 1             | 0           | -3.588324               | -1.517165 | 1.215219  |
| 11            | 16            | 0           | -0.755136               | -1.732692 | 0.535663  |
| 12            | 16            | 0           | 0.530203                | -1.112741 | -1.036049 |
| 13            | 6             | 0           | 1.895123                | -0.134915 | -0.318735 |
| 14            | 6             | 0           | 1.737558                | 1.233361  | -0.120272 |
| 15            | 6             | 0           | 2.855661                | 1.904407  | 0.382508  |
| 16            | 1             | 0           | 0.800061                | 1.732187  | -0.332855 |
| 17            | 6             | 0           | 4.044573                | -0.191809 | 0.393196  |
| 18            | 6             | 0           | 4.022735                | 1.185428  | 0.641409  |
| 19            | 1             | 0           | 2.810696                | 2.973352  | 0.565593  |
| 20            | 1             | 0           | 4.933531                | -0.786857 | 0.580793  |
| 21            | 1             | 0           | 4.906632                | 1.678230  | 1.032385  |
| 22            | 7             | 0           | 2.981779                | -0.854024 | -0.081226 |
| 23            | 1             | 0           | 1.271520                | -2.250978 | -1.043258 |

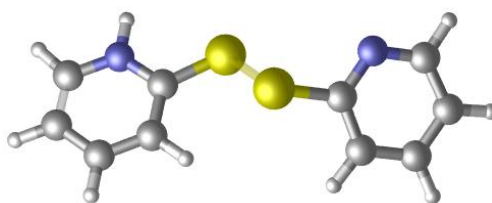

TS1

Standard orientation:

| Center Number | Atomic Number | Atomic Type | Coordinates (Angstroms) |           |           |
|---------------|---------------|-------------|-------------------------|-----------|-----------|
|               |               |             | X                       | Y         | Z         |
| 1             | 6             | 0           | 4.655628                | 0.559281  | 0.184248  |
| 2             | 6             | 0           | 4.806178                | -0.798932 | 0.028045  |
| 3             | 6             | 0           | 3.648738                | -1.597449 | -0.031365 |
| 4             | 6             | 0           | 2.389726                | -1.028775 | 0.081414  |
| 5             | 6             | 0           | 2.251928                | 0.362719  | 0.243927  |
| 6             | 7             | 0           | 3.409609                | 1.093682  | 0.266636  |
| 7             | 1             | 0           | 3.741186                | -2.672484 | -0.152319 |
| 8             | 1             | 0           | 5.480693                | 1.259492  | 0.239154  |
| 9             | 1             | 0           | 5.797993                | -1.227857 | -0.048264 |
| 10            | 1             | 0           | 1.491897                | -1.633425 | 0.048831  |
| 11            | 16            | 0           | 0.763092                | 1.231622  | 0.452869  |
| 12            | 16            | 0           | -0.823309               | -0.267480 | -1.237279 |
| 13            | 6             | 0           | -2.354048               | -0.167514 | -0.419194 |
| 14            | 6             | 0           | -2.796460               | -1.257946 | 0.365442  |
| 15            | 6             | 0           | -4.077520               | -1.206049 | 0.912281  |
| 16            | 1             | 0           | -2.149743               | -2.114584 | 0.519033  |
| 17            | 6             | 0           | -4.301870               | 0.985043  | -0.083943 |
| 18            | 6             | 0           | -4.844391               | -0.066383 | 0.686491  |
| 19            | 1             | 0           | -4.461026               | -2.030497 | 1.505080  |
| 20            | 1             | 0           | -4.880003               | 1.889292  | -0.259380 |
| 21            | 1             | 0           | -5.844779               | 0.027161  | 1.097423  |
| 22            | 7             | 0           | -3.095368               | 0.944686  | -0.631264 |
| 23            | 1             | 0           | 3.320114                | 2.104065  | 0.349325  |

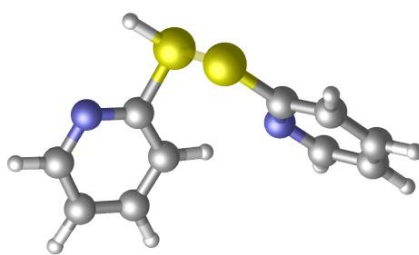

TS1'

Standard orientation:

| Center Number | Atomic Number | Atomic Type | Coordinates (Angstroms) |           |           |
|---------------|---------------|-------------|-------------------------|-----------|-----------|
|               |               |             | X                       | Y         | Z         |
| 1             | 6             | 0           | 2.182201                | 1.564216  | 0.723135  |
| 2             | 6             | 0           | 3.499601                | 1.743843  | 0.238646  |
| 3             | 6             | 0           | 4.067235                | 0.747214  | -0.551763 |
| 4             | 6             | 0           | 3.316845                | -0.394049 | -0.819538 |
| 5             | 6             | 0           | 1.998264                | -0.484869 | -0.289587 |
| 6             | 7             | 0           | 1.441052                | 0.497581  | 0.468126  |
| 7             | 1             | 0           | 5.075647                | 0.847098  | -0.940437 |
| 8             | 1             | 0           | 1.726203                | 2.329152  | 1.347927  |
| 9             | 1             | 0           | 4.048889                | 2.644515  | 0.492928  |
| 10            | 1             | 0           | 3.715879                | -1.203122 | -1.421728 |
| 11            | 16            | 0           | 1.068324                | -1.891501 | -0.654215 |
| 12            | 16            | 0           | -0.958506               | -1.347069 | 1.353760  |
| 13            | 6             | 0           | -1.985635               | -0.226001 | 0.436686  |
| 14            | 6             | 0           | -1.789379               | 1.154198  | 0.591885  |
| 15            | 6             | 0           | -2.640499               | 1.997663  | -0.119396 |
| 16            | 1             | 0           | -1.011361               | 1.539242  | 1.240668  |
| 17            | 6             | 0           | -3.713376               | 0.037024  | -1.021033 |
| 18            | 6             | 0           | -3.619723               | 1.434862  | -0.938786 |
| 19            | 1             | 0           | -2.541797               | 3.075149  | -0.032150 |
| 20            | 1             | 0           | -4.461194               | -0.436180 | -1.651805 |
| 21            | 1             | 0           | -4.300848               | 2.058347  | -1.508290 |
| 22            | 7             | 0           | -2.908333               | -0.788079 | -0.349409 |
| 23            | 1             | 0           | -1.630736               | -2.448198 | 0.947661  |

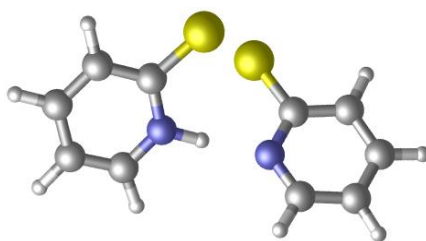

**14a**

Standard orientation:

| Center Number | Atomic Number | Atomic Type | Coordinates (Angstroms) |           |           |
|---------------|---------------|-------------|-------------------------|-----------|-----------|
|               |               |             | X                       | Y         | Z         |
| 1             | 6             | 0           | -2.147301               | 1.731234  | 0.515572  |
| 2             | 6             | 0           | -3.530177               | 1.688077  | 0.520971  |
| 3             | 6             | 0           | -4.160214               | 0.525380  | 0.059056  |
| 4             | 6             | 0           | -3.400411               | -0.557813 | -0.373200 |
| 5             | 6             | 0           | -1.997802               | -0.471935 | -0.388677 |
| 6             | 7             | 0           | -1.430741               | 0.688523  | 0.050213  |
| 7             | 1             | 0           | -5.243538               | 0.453708  | 0.064227  |
| 8             | 1             | 0           | -1.573132               | 2.578428  | 0.873244  |
| 9             | 1             | 0           | -4.096989               | 2.535164  | 0.888618  |
| 10            | 1             | 0           | -3.870664               | -1.480497 | -0.692832 |
| 11            | 16            | 0           | -1.007548               | -1.764612 | -1.007294 |
| 12            | 16            | 0           | 0.980891                | -1.551194 | 1.175674  |
| 13            | 6             | 0           | 1.986361                | -0.363088 | 0.396829  |
| 14            | 6             | 0           | 3.353409                | -0.638833 | 0.194650  |
| 15            | 6             | 0           | 4.178994                | 0.374083  | -0.299446 |
| 16            | 1             | 0           | 3.744459                | -1.621724 | 0.432616  |
| 17            | 6             | 0           | 2.220286                | 1.765256  | -0.462154 |
| 18            | 6             | 0           | 3.606501                | 1.595143  | -0.637266 |
| 19            | 1             | 0           | 5.240589                | 0.197283  | -0.440856 |
| 20            | 1             | 0           | 1.740192                | 2.695477  | -0.755297 |
| 21            | 1             | 0           | 4.200776                | 2.404742  | -1.047473 |
| 22            | 7             | 0           | 1.431895                | 0.830914  | 0.059519  |
| 23            | 1             | 0           | -0.381134               | 0.769235  | 0.057531  |

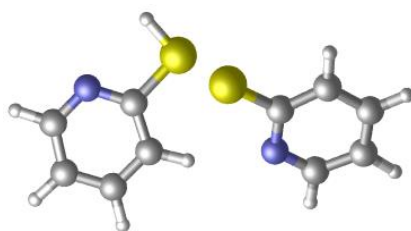

**14a'**

Standard orientation:

| Center Number | Atomic Number | Atomic Type | Coordinates (Angstroms) |           |           |
|---------------|---------------|-------------|-------------------------|-----------|-----------|
|               |               |             | X                       | Y         | Z         |
| 1             | 6             | 0           | 2.468810                | 1.624307  | 0.572288  |
| 2             | 6             | 0           | 3.871584                | 1.551992  | 0.395594  |
| 3             | 6             | 0           | 4.418974                | 0.411681  | -0.185309 |
| 4             | 6             | 0           | 3.557276                | -0.612309 | -0.571285 |
| 5             | 6             | 0           | 2.158394                | -0.437612 | -0.383870 |
| 6             | 7             | 0           | 1.626892                | 0.674970  | 0.195543  |
| 7             | 1             | 0           | 5.490622                | 0.313671  | -0.326557 |
| 8             | 1             | 0           | 2.028777                | 2.498357  | 1.047237  |
| 9             | 1             | 0           | 4.498215                | 2.374395  | 0.725161  |
| 10            | 1             | 0           | 3.931248                | -1.527252 | -1.018054 |
| 11            | 16            | 0           | 1.088027                | -1.663492 | -0.950268 |
| 12            | 16            | 0           | -0.914759               | -1.093245 | 1.366709  |
| 13            | 6             | 0           | -2.133840               | -0.183210 | 0.466389  |
| 14            | 6             | 0           | -1.852355               | 1.143323  | 0.095315  |
| 15            | 6             | 0           | -2.856660               | 1.839409  | -0.572453 |
| 16            | 1             | 0           | -0.882334               | 1.580949  | 0.303489  |
| 17            | 6             | 0           | -4.224140               | -0.144863 | -0.431443 |
| 18            | 6             | 0           | -4.064586               | 1.192172  | -0.837395 |
| 19            | 1             | 0           | -2.697759               | 2.866993  | -0.883767 |
| 20            | 1             | 0           | -5.147572               | -0.681004 | -0.633663 |
| 21            | 1             | 0           | -4.870775               | 1.699196  | -1.357120 |
| 22            | 7             | 0           | -3.276842               | -0.830247 | 0.206330  |
| 23            | 1             | 0           | -1.633824               | -2.239916 | 1.380114  |

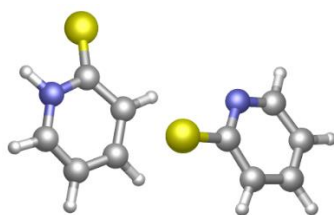

**15a**

Standard orientation:

| Center<br>Number | Atomic<br>Number | Atomic<br>Type | Coordinates (Angstroms) |           |           |
|------------------|------------------|----------------|-------------------------|-----------|-----------|
|                  |                  |                | X                       | Y         | Z         |
| 1                | 6                | 0              | -3.180883               | -1.673726 | -0.118635 |
| 2                | 6                | 0              | -2.028540               | -2.073171 | -0.762959 |
| 3                | 6                | 0              | -0.999089               | -1.134559 | -0.931143 |
| 4                | 6                | 0              | -1.152595               | 0.192461  | -0.444990 |
| 5                | 6                | 0              | -2.469235               | 0.647773  | -0.011899 |
| 6                | 7                | 0              | -3.365644               | -0.386250 | 0.254319  |
| 7                | 1                | 0              | -0.111452               | -1.389465 | -1.499905 |
| 8                | 1                | 0              | -4.003511               | -2.349681 | 0.087956  |
| 9                | 1                | 0              | -1.922738               | -3.096061 | -1.100718 |
| 10               | 1                | 0              | -0.405566               | 0.955768  | -0.630948 |
| 11               | 16               | 0              | -3.004239               | 2.234484  | -0.032276 |
| 12               | 16               | 0              | 0.623890                | -0.993086 | 1.159140  |
| 13               | 6                | 0              | 2.007782                | -0.255752 | 0.416939  |
| 14               | 6                | 0              | 3.060915                | -1.085032 | -0.042280 |
| 15               | 6                | 0              | 4.238336                | -0.479320 | -0.479995 |
| 16               | 1                | 0              | 2.953724                | -2.164250 | -0.020714 |
| 17               | 6                | 0              | 3.162244                | 1.652422  | -0.106394 |
| 18               | 6                | 0              | 4.294792                | 0.911081  | -0.512542 |
| 19               | 1                | 0              | 5.081559                | -1.081343 | -0.803702 |
| 20               | 1                | 0              | 3.169496                | 2.738320  | -0.164620 |
| 21               | 1                | 0              | 5.182504                | 1.429998  | -0.859772 |
| 22               | 7                | 0              | 2.053392                | 1.097872  | 0.362391  |
| 23               | 1                | 0              | -4.275041               | -0.100066 | 0.609006  |

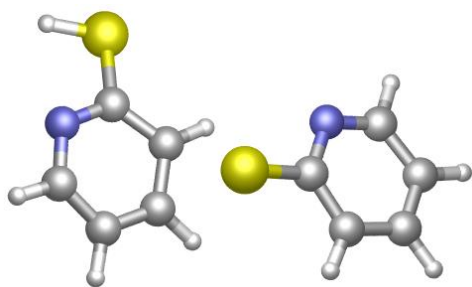

**15a'**

Standard orientation:

| Center Number | Atomic Number | Atomic Type | Coordinates (Angstroms) |           |           |
|---------------|---------------|-------------|-------------------------|-----------|-----------|
|               |               |             | X                       | Y         | Z         |
| 1             | 6             | 0           | 3.144753                | 1.709947  | -0.009598 |
| 2             | 6             | 0           | 2.011106                | 2.140659  | -0.701622 |
| 3             | 6             | 0           | 1.006352                | 1.209853  | -0.941283 |
| 4             | 6             | 0           | 1.170773                | -0.137677 | -0.477959 |
| 5             | 6             | 0           | 2.503214                | -0.500984 | -0.020313 |
| 6             | 7             | 0           | 3.407807                | 0.420311  | 0.270307  |
| 7             | 1             | 0           | 0.117903                | 1.470815  | -1.506016 |
| 8             | 1             | 0           | 3.913898                | 2.416485  | 0.292019  |
| 9             | 1             | 0           | 1.910804                | 3.173329  | -1.014271 |
| 10            | 1             | 0           | 0.446147                | -0.909559 | -0.715979 |
| 11            | 16            | 0           | 3.052431                | -2.195094 | -0.070285 |
| 12            | 16            | 0           | -0.638851               | 0.950982  | 1.144887  |
| 13            | 6             | 0           | -2.013224               | 0.221612  | 0.400805  |
| 14            | 6             | 0           | -3.051565               | 1.064479  | -0.075721 |
| 15            | 6             | 0           | -4.246852               | 0.475864  | -0.488958 |
| 16            | 1             | 0           | -2.917968               | 2.140976  | -0.082372 |
| 17            | 6             | 0           | -3.208715               | -1.672902 | -0.072740 |
| 18            | 6             | 0           | -4.330874               | -0.912700 | -0.487381 |
| 19            | 1             | 0           | -5.079482               | 1.087761  | -0.821069 |
| 20            | 1             | 0           | -3.243082               | -2.759237 | -0.109115 |
| 21            | 1             | 0           | -5.231676               | -1.421183 | -0.816383 |
| 22            | 7             | 0           | -2.086764               | -1.134563 | 0.374885  |
| 23            | 1             | 0           | 4.309053                | -1.882745 | 0.311826  |

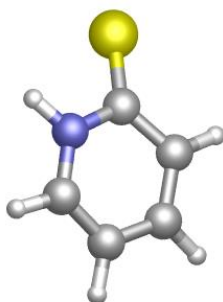

**4a'**

Standard orientation:

| Center Number | Atomic Number | Atomic Type | Coordinates (Angstroms) |           |           |
|---------------|---------------|-------------|-------------------------|-----------|-----------|
|               |               |             | X                       | Y         | Z         |
| 1             | 6             | 0           | 1.488502                | -1.189382 | -0.000139 |
| 2             | 6             | 0           | 2.243288                | -0.050854 | -0.000084 |
| 3             | 6             | 0           | 1.560446                | 1.197792  | -0.000109 |
| 4             | 6             | 0           | 0.190030                | 1.252334  | -0.000067 |
| 5             | 6             | 0           | -0.615379               | 0.063651  | 0.000802  |
| 6             | 7             | 0           | 0.127782                | -1.111415 | 0.000264  |
| 7             | 1             | 0           | 2.135420                | 2.119956  | 0.000366  |
| 8             | 1             | 0           | 1.906315                | -2.189885 | -0.000904 |
| 9             | 1             | 0           | 3.324783                | -0.110063 | -0.000533 |
| 10            | 1             | 0           | -0.336792               | 2.199116  | 0.000205  |
| 11            | 16            | 0           | -2.293744               | 0.005105  | -0.000252 |
| 12            | 1             | 0           | -0.425619               | -1.962156 | 0.000629  |



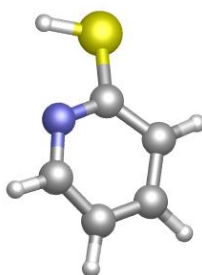

**4a**

Standard orientation:

| Center Number | Atomic Number | Atomic Type | Coordinates (Angstroms) |           |           |
|---------------|---------------|-------------|-------------------------|-----------|-----------|
|               |               |             | X                       | Y         | Z         |
| 1             | 6             | 0           | 1.451073                | -1.222134 | -0.000034 |
| 2             | 6             | 0           | 2.257415                | -0.086484 | -0.000033 |
| 3             | 6             | 0           | 1.629801                | 1.162269  | 0.000050  |
| 4             | 6             | 0           | 0.241355                | 1.223772  | 0.000034  |
| 5             | 6             | 0           | -0.472475               | 0.014341  | 0.000026  |
| 6             | 7             | 0           | 0.110781                | -1.186358 | 0.000004  |
| 7             | 1             | 0           | 2.215774                | 2.077440  | 0.000073  |
| 8             | 1             | 0           | 1.893213                | -2.216755 | -0.000056 |
| 9             | 1             | 0           | 3.338849                | -0.177430 | -0.000051 |
| 10            | 1             | 0           | -0.280213               | 2.175950  | -0.000022 |
| 11            | 16            | 0           | -2.260837               | 0.072607  | -0.000063 |
| 12            | 1             | 0           | -2.412711               | -1.267003 | 0.000784  |

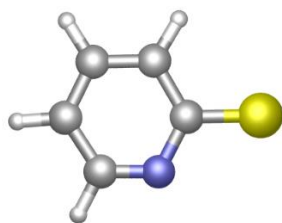

**10a**

Standard orientation:

| Center Number | Atomic Number | Atomic Type | Coordinates (Angstroms) |           |           |
|---------------|---------------|-------------|-------------------------|-----------|-----------|
|               |               |             | X                       | Y         | Z         |
| 1             | 16            | 0           | 2.228002                | 0.005512  | -0.000310 |
| 2             | 6             | 0           | 0.566264                | -0.023513 | 0.000371  |
| 3             | 6             | 0           | -0.169490               | 1.233400  | 0.000480  |
| 4             | 6             | 0           | -1.556128               | 1.208929  | -0.000092 |
| 5             | 1             | 0           | 0.388404                | 2.165094  | 0.000815  |
| 6             | 6             | 0           | -1.378469               | -1.250343 | -0.000098 |
| 7             | 6             | 0           | -2.171082               | -0.043236 | -0.000440 |
| 8             | 1             | 0           | -2.139225               | 2.124250  | -0.000158 |
| 9             | 1             | 0           | -1.878395               | -2.216564 | 0.000317  |
| 10            | 1             | 0           | -3.254981               | -0.129003 | -0.000944 |
| 11            | 7             | 0           | -0.072915               | -1.254770 | 0.000514  |

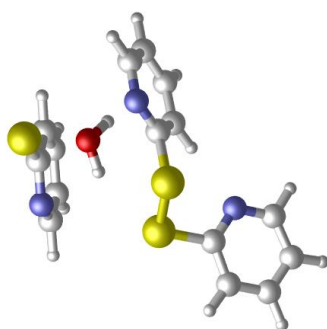

**16a**

Standard orientation:

| Center Number | Atomic Number | Atomic Type | Coordinates (Angstroms) |           |           |
|---------------|---------------|-------------|-------------------------|-----------|-----------|
|               |               |             | X                       | Y         | Z         |
| 1             | 6             | 0           | 2.099244                | 2.767219  | -0.393306 |
| 2             | 6             | 0           | 1.526218                | 3.483686  | 0.651678  |
| 3             | 6             | 0           | 0.265666                | 3.091215  | 1.113648  |
| 4             | 6             | 0           | -0.383083               | 2.012631  | 0.516995  |
| 5             | 6             | 0           | 0.284959                | 1.343409  | -0.512921 |
| 6             | 7             | 0           | 1.499008                | 1.701297  | -0.951920 |
| 7             | 1             | 0           | -0.220117               | 3.638885  | 1.916144  |
| 8             | 1             | 0           | 3.072032                | 3.032944  | -0.797765 |
| 9             | 1             | 0           | 2.048232                | 4.331558  | 1.082202  |
| 10            | 1             | 0           | -1.387475               | 1.708072  | 0.795083  |
| 11            | 16            | 0           | -0.434697               | -0.027261 | -1.439985 |
| 12            | 16            | 0           | -1.422022               | -1.208321 | -0.029032 |
| 13            | 6             | 0           | -3.131642               | -0.618548 | -0.083117 |
| 14            | 6             | 0           | -4.140950               | -1.555279 | -0.320863 |
| 15            | 6             | 0           | -5.462563               | -1.105974 | -0.280838 |
| 16            | 1             | 0           | -3.900727               | -2.589760 | -0.541207 |
| 17            | 6             | 0           | -4.619934               | 1.094608  | 0.168130  |
| 18            | 6             | 0           | -5.709154               | 0.243735  | -0.037189 |
| 19            | 1             | 0           | -6.280704               | -1.798052 | -0.456341 |
| 20            | 1             | 0           | -4.769436               | 2.155626  | 0.352579  |
| 21            | 1             | 0           | -6.720277               | 0.636276  | -0.010643 |
| 22            | 7             | 0           | -3.349803               | 0.672969  | 0.163278  |
| 23            | 6             | 0           | 1.349395                | -2.395720 | 1.461986  |
| 24            | 6             | 0           | 1.244286                | -1.426246 | 2.484981  |
| 25            | 6             | 0           | 2.039688                | -0.286686 | 2.429167  |
| 26            | 6             | 0           | 2.907827                | -0.141828 | 1.347379  |
| 27            | 6             | 0           | 2.947993                | -1.170255 | 0.381155  |
| 28            | 7             | 0           | 2.176014                | -2.281935 | 0.433786  |

---

|    |    |   |          |           |           |
|----|----|---|----------|-----------|-----------|
| 29 | 1  | 0 | 1.978525 | 0.478768  | 3.195714  |
| 30 | 1  | 0 | 0.730518 | -3.288614 | 1.488198  |
| 31 | 1  | 0 | 0.542830 | -1.580400 | 3.298613  |
| 32 | 1  | 0 | 3.534436 | 0.735358  | 1.237499  |
| 33 | 16 | 0 | 4.063511 | -1.053462 | -0.943038 |
| 34 | 8  | 0 | 2.761534 | -0.371501 | -2.442967 |
| 35 | 1  | 0 | 2.372466 | 0.484086  | -2.069152 |
| 36 | 1  | 0 | 2.014518 | -1.010164 | -2.431625 |

---

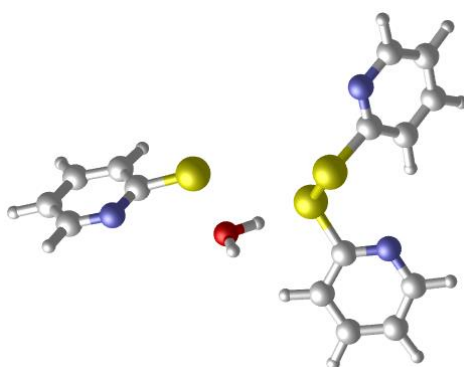

**16a'**

Standard orientation:

| Center Number | Atomic Number | Atomic Type | Coordinates (Angstroms) |           |           |
|---------------|---------------|-------------|-------------------------|-----------|-----------|
|               |               |             | X                       | Y         | Z         |
| 1             | 6             | 0           | 3.703524                | 3.158793  | -0.144628 |
| 2             | 6             | 0           | 3.078597                | 4.408477  | -0.127987 |
| 3             | 6             | 0           | 1.705505                | 4.464278  | 0.105458  |
| 4             | 6             | 0           | 1.003999                | 3.273238  | 0.305063  |
| 5             | 6             | 0           | 1.739252                | 2.086482  | 0.278075  |
| 6             | 7             | 0           | 3.047240                | 2.011451  | 0.067831  |
| 7             | 1             | 0           | 1.182448                | 5.415748  | 0.120847  |
| 8             | 1             | 0           | 4.771213                | 3.069772  | -0.327405 |
| 9             | 1             | 0           | 3.657678                | 5.310238  | -0.296541 |
| 10            | 1             | 0           | -0.068781               | 3.271991  | 0.472793  |
| 11            | 16            | 0           | 0.887210                | 0.518619  | 0.628515  |
| 12            | 16            | 0           | 1.371988                | -0.762781 | -0.968588 |
| 13            | 6             | 0           | 2.667351                | -1.831702 | -0.286295 |
| 14            | 6             | 0           | 3.777733                | -1.320084 | 0.390469  |
| 15            | 6             | 0           | 4.725525                | -2.244184 | 0.828480  |
| 16            | 1             | 0           | 3.892192                | -0.252519 | 0.544911  |
| 17            | 6             | 0           | 3.407105                | -3.980551 | -0.175982 |
| 18            | 6             | 0           | 4.541622                | -3.598036 | 0.540865  |
| 19            | 1             | 0           | 5.604607                | -1.907403 | 1.370208  |
| 20            | 1             | 0           | 3.232495                | -5.022017 | -0.434423 |
| 21            | 1             | 0           | 5.262876                | -4.343526 | 0.859586  |
| 22            | 7             | 0           | 2.465246                | -3.112628 | -0.572519 |
| 23            | 6             | 0           | -6.271052               | 0.135287  | -0.736563 |
| 24            | 6             | 0           | -6.790273               | -0.128689 | 0.550944  |
| 25            | 6             | 0           | -5.946955               | -0.630327 | 1.537243  |
| 26            | 6             | 0           | -4.608066               | -0.848883 | 1.210261  |
| 27            | 6             | 0           | -4.193722               | -0.581946 | -0.112923 |

---

|    |    |   |           |           |           |
|----|----|---|-----------|-----------|-----------|
| 28 | 7  | 0 | -5.010267 | -0.091032 | -1.074799 |
| 29 | 1  | 0 | -6.314906 | -0.838664 | 2.536788  |
| 30 | 1  | 0 | -6.915400 | 0.536596  | -1.515030 |
| 31 | 1  | 0 | -7.838835 | 0.063469  | 0.756286  |
| 32 | 1  | 0 | -3.898129 | -1.222741 | 1.939983  |
| 33 | 16 | 0 | -2.572038 | -0.976831 | -0.581794 |
| 34 | 8  | 0 | -1.740950 | 0.948412  | -0.468957 |
| 35 | 1  | 0 | -1.627063 | 1.206044  | -1.406240 |
| 36 | 1  | 0 | -0.763765 | 0.834150  | -0.038701 |

---

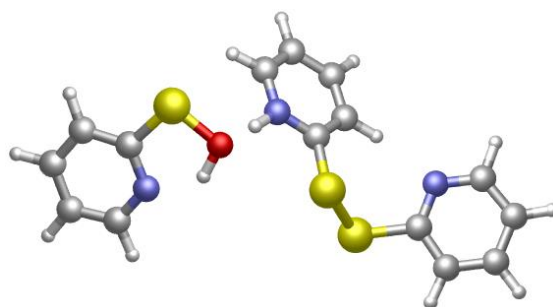

**17a**

Standard orientation:

| Center Number | Atomic Number | Atomic Type | Coordinates (Angstroms) |           |           |
|---------------|---------------|-------------|-------------------------|-----------|-----------|
|               |               |             | X                       | Y         | Z         |
| 1             | 6             | 0           | -0.947785               | 2.676706  | -0.276124 |
| 2             | 6             | 0           | -0.119630               | 3.521039  | -0.987626 |
| 3             | 6             | 0           | 1.191345                | 3.100439  | -1.256476 |
| 4             | 6             | 0           | 1.644156                | 1.861671  | -0.813059 |
| 5             | 6             | 0           | 0.766591                | 1.033307  | -0.109195 |
| 6             | 7             | 0           | -0.494804               | 1.468168  | 0.128649  |
| 7             | 1             | 0           | 1.868377                | 3.753012  | -1.799419 |
| 8             | 1             | 0           | -1.973645               | 2.904426  | -0.011046 |
| 9             | 1             | 0           | -0.485731               | 4.485847  | -1.318132 |
| 10            | 1             | 0           | 2.669526                | 1.532794  | -0.952527 |
| 11            | 16            | 0           | 1.155451                | -0.563278 | 0.581297  |
| 12            | 16            | 0           | 2.441651                | -1.419615 | -0.825506 |
| 13            | 6             | 0           | 4.089796                | -0.987804 | -0.217009 |
| 14            | 6             | 0           | 5.002414                | -2.024316 | -0.006216 |
| 15            | 6             | 0           | 6.298042                | -1.675334 | 0.380920  |
| 16            | 1             | 0           | 4.707369                | -3.060718 | -0.129334 |
| 17            | 6             | 0           | 5.608900                | 0.622135  | 0.344990  |
| 18            | 6             | 0           | 6.607823                | -0.329373 | 0.565887  |
| 19            | 1             | 0           | 7.043319                | -2.446239 | 0.552040  |
| 20            | 1             | 0           | 5.808305                | 1.681532  | 0.486430  |
| 21            | 1             | 0           | 7.598494                | -0.016808 | 0.878877  |
| 22            | 7             | 0           | 4.371921                | 0.305625  | -0.056814 |
| 23            | 6             | 0           | -4.383204               | -2.215117 | -0.816441 |
| 24            | 6             | 0           | -5.665004               | -2.052329 | -1.329752 |
| 25            | 6             | 0           | -6.407958               | -0.934566 | -0.930885 |
| 26            | 6             | 0           | -5.853005               | -0.020416 | -0.040343 |
| 27            | 6             | 0           | -4.557019               | -0.281796 | 0.412431  |
| 28            | 7             | 0           | -3.838051               | -1.339428 | 0.043867  |

---

|    |    |   |           |           |           |
|----|----|---|-----------|-----------|-----------|
| 29 | 1  | 0 | -7.412744 | -0.778017 | -1.311694 |
| 30 | 1  | 0 | -3.764410 | -3.065254 | -1.088942 |
| 31 | 1  | 0 | -6.073044 | -2.781249 | -2.021168 |
| 32 | 1  | 0 | -6.402174 | 0.855225  | 0.291776  |
| 33 | 16 | 0 | -3.725260 | 0.771032  | 1.608091  |
| 34 | 8  | 0 | -2.228958 | -0.052195 | 1.567247  |
| 35 | 1  | 0 | -1.158778 | 0.840964  | 0.649664  |
| 36 | 1  | 0 | -2.468919 | -0.904187 | 1.076864  |

---



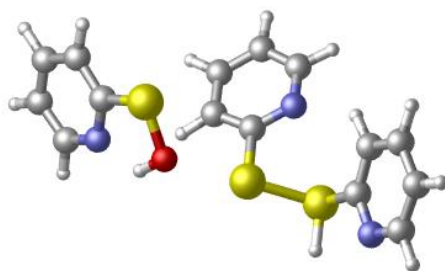

**17a'**

Standard orientation:

| Center Number | Atomic Number | Atomic Type | Coordinates (Angstroms) |           |           |
|---------------|---------------|-------------|-------------------------|-----------|-----------|
|               |               |             | X                       | Y         | Z         |
| 1             | 6             | 0           | 0.572267                | 3.054897  | 0.440840  |
| 2             | 6             | 0           | -0.759357               | 3.448464  | 0.306608  |
| 3             | 6             | 0           | -1.665663               | 2.544366  | -0.246054 |
| 4             | 6             | 0           | -1.219508               | 1.283566  | -0.643141 |
| 5             | 6             | 0           | 0.125736                | 0.984196  | -0.426365 |
| 6             | 7             | 0           | 1.008564                | 1.834717  | 0.097940  |
| 7             | 1             | 0           | -2.707133               | 2.817619  | -0.386810 |
| 8             | 1             | 0           | 1.320849                | 3.733348  | 0.841238  |
| 9             | 1             | 0           | -1.068399               | 4.441228  | 0.615694  |
| 10            | 1             | 0           | -1.888812               | 0.567842  | -1.102725 |
| 11            | 16            | 0           | 0.768072                | -0.655225 | -0.853129 |
| 12            | 16            | 0           | 2.657054                | 0.171574  | -1.591182 |
| 13            | 6             | 0           | 3.934990                | -0.244441 | -0.355965 |
| 14            | 6             | 0           | 3.962282                | 0.424836  | 0.863810  |
| 15            | 6             | 0           | 4.999616                | 0.068805  | 1.728494  |
| 16            | 1             | 0           | 3.208056                | 1.161384  | 1.115857  |
| 17            | 6             | 0           | 5.776740                | -1.493234 | 0.070523  |
| 18            | 6             | 0           | 5.921026                | -0.899675 | 1.327495  |
| 19            | 1             | 0           | 5.083772                | 0.544582  | 2.700635  |
| 20            | 1             | 0           | 6.469348                | -2.253755 | -0.278533 |
| 21            | 1             | 0           | 6.737402                | -1.197673 | 1.976871  |
| 22            | 7             | 0           | 4.783121                | -1.172718 | -0.770308 |
| 23            | 6             | 0           | -4.825704               | -0.922434 | -1.323118 |
| 24            | 6             | 0           | -5.957238               | -0.385212 | -0.721066 |
| 25            | 6             | 0           | -5.904429               | -0.079240 | 0.645120  |
| 26            | 6             | 0           | -4.735440               | -0.317341 | 1.359869  |
| 27            | 6             | 0           | -3.656190               | -0.865419 | 0.657560  |
| 28            | 7             | 0           | -3.690545               | -1.159163 | -0.643029 |
| 29            | 1             | 0           | -6.770168               | 0.341966  | 1.147496  |

---

|    |    |   |           |           |           |
|----|----|---|-----------|-----------|-----------|
| 30 | 1  | 0 | -4.810876 | -1.179575 | -2.378517 |
| 31 | 1  | 0 | -6.856277 | -0.212794 | -1.302327 |
| 32 | 1  | 0 | -4.661800 | -0.092997 | 2.419589  |
| 33 | 16 | 0 | -2.109217 | -1.269290 | 1.459214  |
| 34 | 8  | 0 | -1.277728 | -1.758666 | 0.063884  |
| 35 | 1  | 0 | -2.010211 | -1.822377 | -0.622616 |
| 36 | 1  | 0 | 2.998793  | -0.865081 | -2.395244 |

---

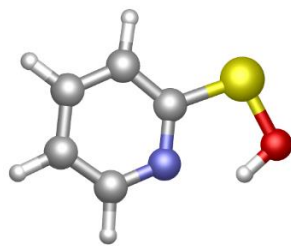

**11a**

Standard orientation:

| Center<br>Number | Atomic<br>Number | Atomic<br>Type | Coordinates (Angstroms) |           |           |
|------------------|------------------|----------------|-------------------------|-----------|-----------|
|                  |                  |                | X                       | Y         | Z         |
| 1                | 6                | 0              | -1.478173               | 1.350483  | -0.000240 |
| 2                | 6                | 0              | -2.509498               | 0.418778  | 0.000002  |
| 3                | 6                | 0              | -2.171037               | -0.941941 | 0.000120  |
| 4                | 6                | 0              | -0.835106               | -1.315983 | 0.000165  |
| 5                | 6                | 0              | 0.128308                | -0.293126 | 0.000128  |
| 6                | 7                | 0              | -0.181789               | 1.006097  | -0.000084 |
| 7                | 1                | 0              | -2.947615               | -1.701857 | 0.000280  |
| 8                | 1                | 0              | -1.684583               | 2.418235  | -0.000204 |
| 9                | 1                | 0              | -3.544381               | 0.743923  | 0.000063  |
| 10               | 1                | 0              | -0.538285               | -2.360731 | 0.000279  |
| 11               | 16               | 0              | 1.866718                | -0.647274 | -0.000291 |
| 12               | 8                | 0              | 2.459821                | 0.927833  | 0.000522  |
| 13               | 1                | 0              | 1.634364                | 1.482196  | -0.000393 |

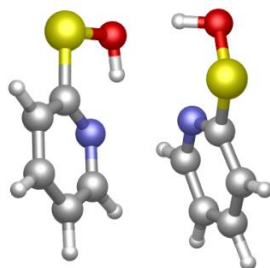

**18a**

Standard orientation:

| Center Number | Atomic Number | Atomic Type | Coordinates (Angstroms) |           |           |
|---------------|---------------|-------------|-------------------------|-----------|-----------|
|               |               |             | X                       | Y         | Z         |
| 1             | 6             | 0           | 2.357319                | 0.359228  | 1.653019  |
| 2             | 6             | 0           | 3.041340                | 1.486865  | 1.202530  |
| 3             | 6             | 0           | 3.134274                | 1.688815  | -0.179114 |
| 4             | 6             | 0           | 2.552156                | 0.765579  | -1.038734 |
| 5             | 6             | 0           | 1.873824                | -0.330137 | -0.476671 |
| 6             | 7             | 0           | 1.769717                | -0.529586 | 0.840792  |
| 7             | 1             | 0           | 3.668160                | 2.547091  | -0.578726 |
| 8             | 1             | 0           | 2.260589                | 0.158907  | 2.718424  |
| 9             | 1             | 0           | 3.491174                | 2.177609  | 1.908521  |
| 10            | 1             | 0           | 2.629663                | 0.872368  | -2.117025 |
| 11            | 16            | 0           | 1.030306                | -1.458660 | -1.569218 |
| 12            | 8             | 0           | 0.869971                | -2.830640 | -0.642681 |
| 13            | 1             | 0           | 0.164782                | -2.640175 | 0.025617  |
| 14            | 6             | 0           | -0.725898               | 1.962605  | 0.262861  |
| 15            | 6             | 0           | -1.594968               | 2.771938  | -0.462137 |
| 16            | 6             | 0           | -2.823928               | 2.232017  | -0.862466 |
| 17            | 6             | 0           | -3.135398               | 0.916773  | -0.539036 |
| 18            | 6             | 0           | -2.185530               | 0.192605  | 0.195986  |
| 19            | 7             | 0           | -1.022955               | 0.700146  | 0.597430  |
| 20            | 1             | 0           | -3.527197               | 2.830187  | -1.435320 |
| 21            | 1             | 0           | 0.246282                | 2.319934  | 0.593407  |
| 22            | 1             | 0           | -1.319485               | 3.791498  | -0.710545 |
| 23            | 1             | 0           | -4.068444               | 0.459880  | -0.855000 |
| 24            | 16            | 0           | -2.469772               | -1.494160 | 0.692417  |
| 25            | 8             | 0           | -0.905796               | -1.884605 | 1.213250  |
| 26            | 1             | 0           | -0.413943               | -1.021872 | 1.309940  |

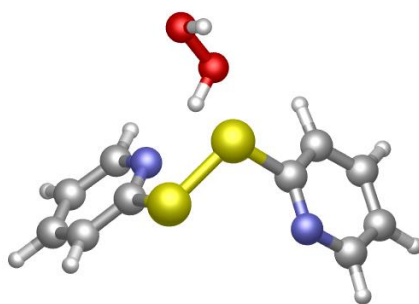

**19a**

Standard orientation:

| Center Number | Atomic Number | Atomic Type | Coordinates (Angstroms) |           |           |
|---------------|---------------|-------------|-------------------------|-----------|-----------|
|               |               |             | X                       | Y         | Z         |
| 1             | 6             | 0           | 3.351094                | -1.591492 | -0.811643 |
| 2             | 6             | 0           | 3.864096                | -0.544418 | -1.581075 |
| 3             | 6             | 0           | 3.366997                | 0.739755  | -1.363769 |
| 4             | 6             | 0           | 2.382810                | 0.932064  | -0.393399 |
| 5             | 6             | 0           | 1.966878                | -0.189842 | 0.332951  |
| 6             | 7             | 0           | 2.428856                | -1.423362 | 0.142101  |
| 7             | 1             | 0           | 3.721706                | 1.580987  | -1.953000 |
| 8             | 1             | 0           | 3.701338                | -2.611532 | -0.958347 |
| 9             | 1             | 0           | 4.623413                | -0.737967 | -2.332495 |
| 10            | 1             | 0           | 1.920968                | 1.900310  | -0.230023 |
| 11            | 16            | 0           | 0.771568                | 0.070924  | 1.673523  |
| 12            | 8             | 0           | -0.844912               | 3.226663  | 1.073870  |
| 13            | 1             | 0           | -0.189880               | 2.941528  | 1.737581  |
| 14            | 6             | 0           | -2.543846               | 0.783542  | -1.277993 |
| 15            | 6             | 0           | -3.652418               | 0.026649  | -1.636273 |
| 16            | 6             | 0           | -3.817022               | -1.223507 | -1.031224 |
| 17            | 6             | 0           | -2.880797               | -1.658677 | -0.101657 |
| 18            | 6             | 0           | -1.794314               | -0.817242 | 0.189863  |
| 19            | 7             | 0           | -1.625688               | 0.367965  | -0.388799 |
| 20            | 1             | 0           | -4.669477               | -1.850414 | -1.277767 |
| 21            | 1             | 0           | -2.364372               | 1.769363  | -1.699964 |
| 22            | 1             | 0           | -4.365451               | 0.404168  | -2.361474 |
| 23            | 1             | 0           | -2.983265               | -2.620904 | 0.391080  |
| 24            | 16            | 0           | -0.615180               | -1.442688 | 1.404068  |
| 25            | 8             | 0           | -0.208874               | 2.770792  | -0.149289 |
| 26            | 1             | 0           | -0.549936               | 1.839827  | -0.181486 |

## 5. Copies of the $^1\text{H}$ , $^{13}\text{C}$ NMR and IR Spectra of the Products

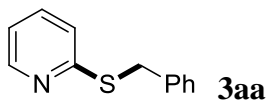

$^1\text{H}$  NMR ( $\text{CDCl}_3$ , 600 M Hz)

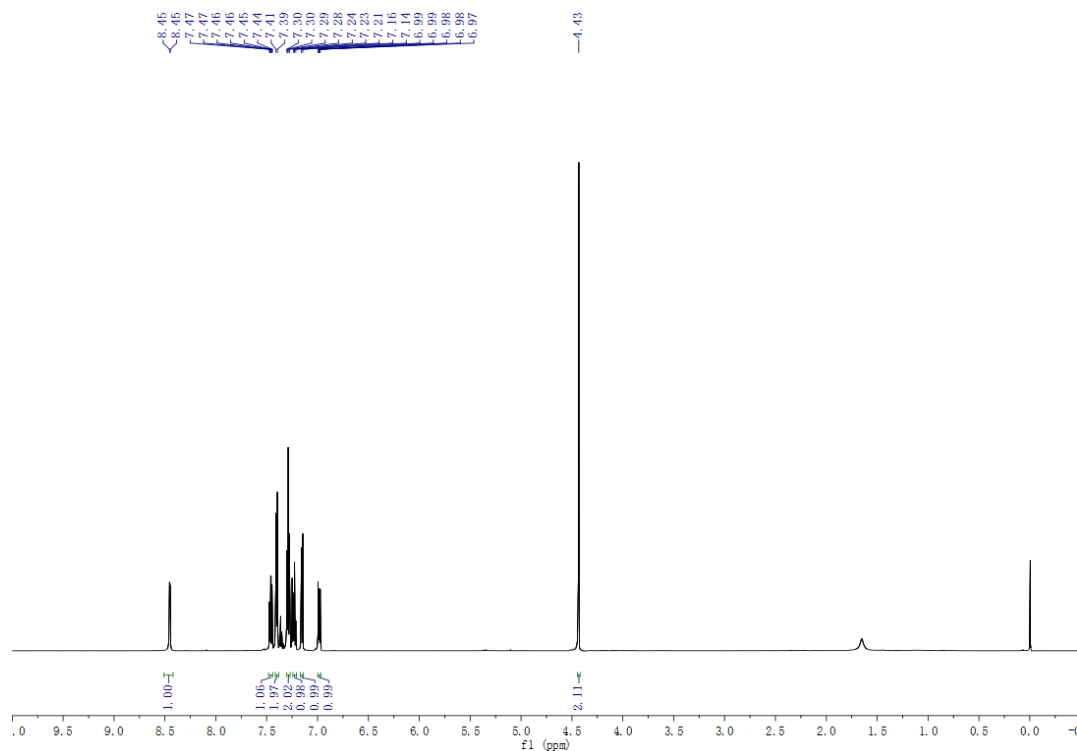

$^{13}\text{C}$  NMR ( $\text{CDCl}_3$ , 150 M Hz)

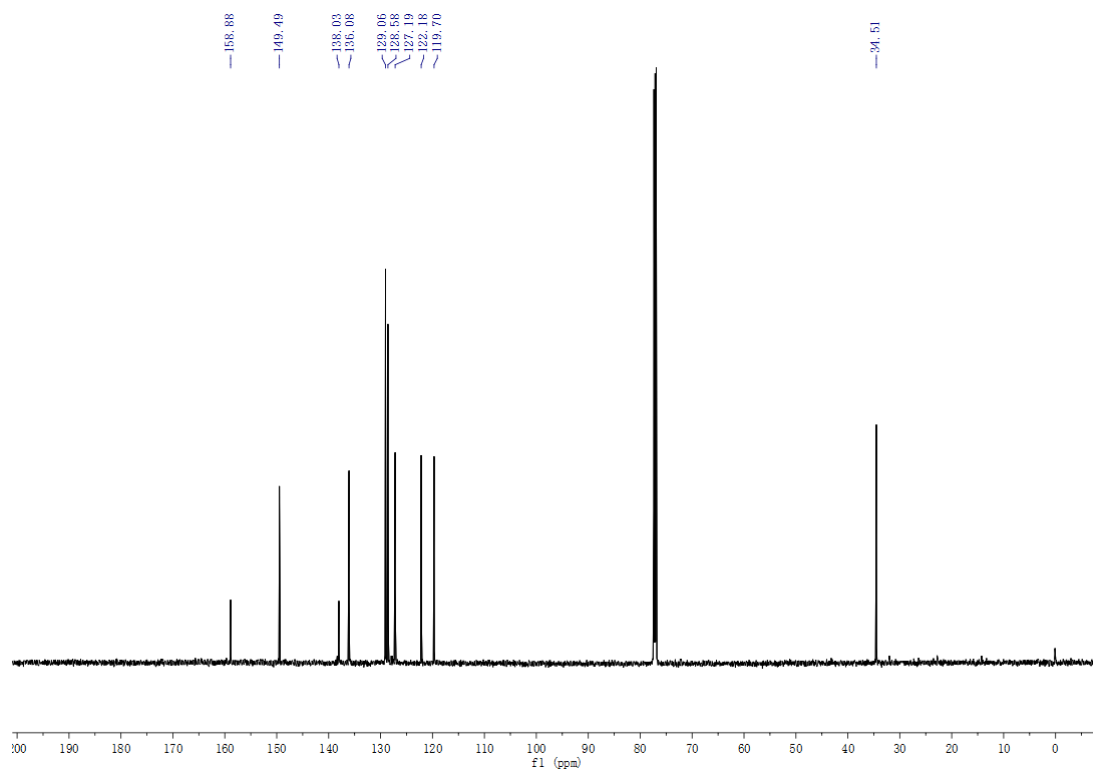

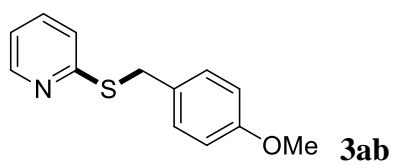

$^1\text{H NMR}$  ( $\text{CDCl}_3$ , 600 M Hz)

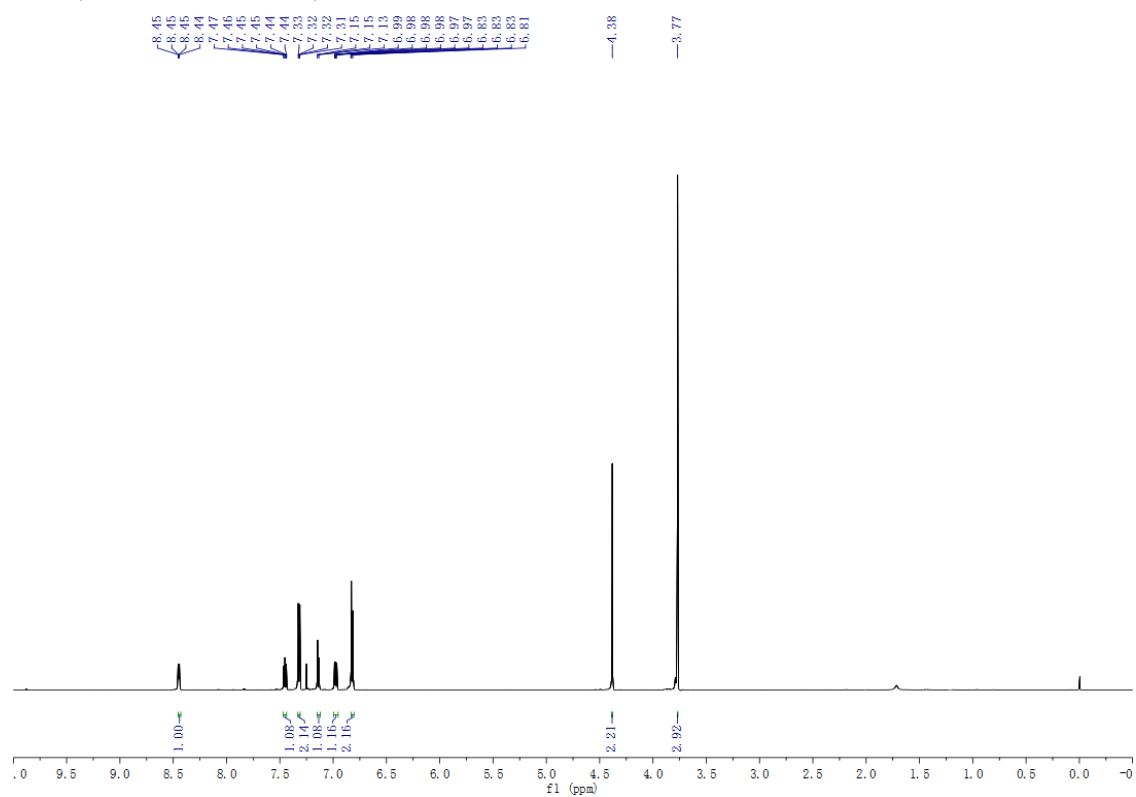

$^{13}\text{C NMR}$  ( $\text{CDCl}_3$ , 150 M Hz)

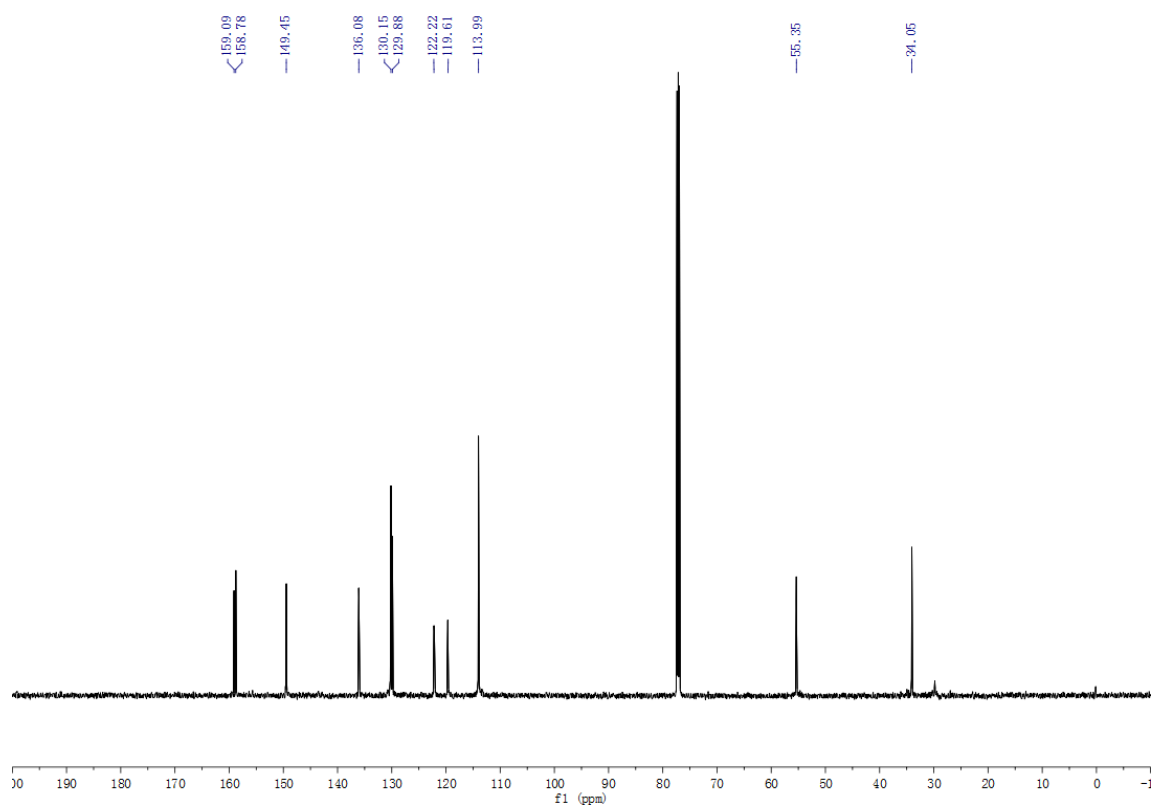

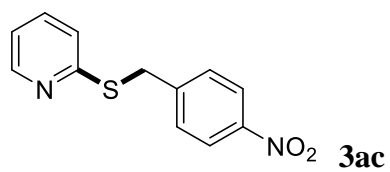

$^1\text{H NMR}$  ( $\text{CDCl}_3$ , 600 MHz)

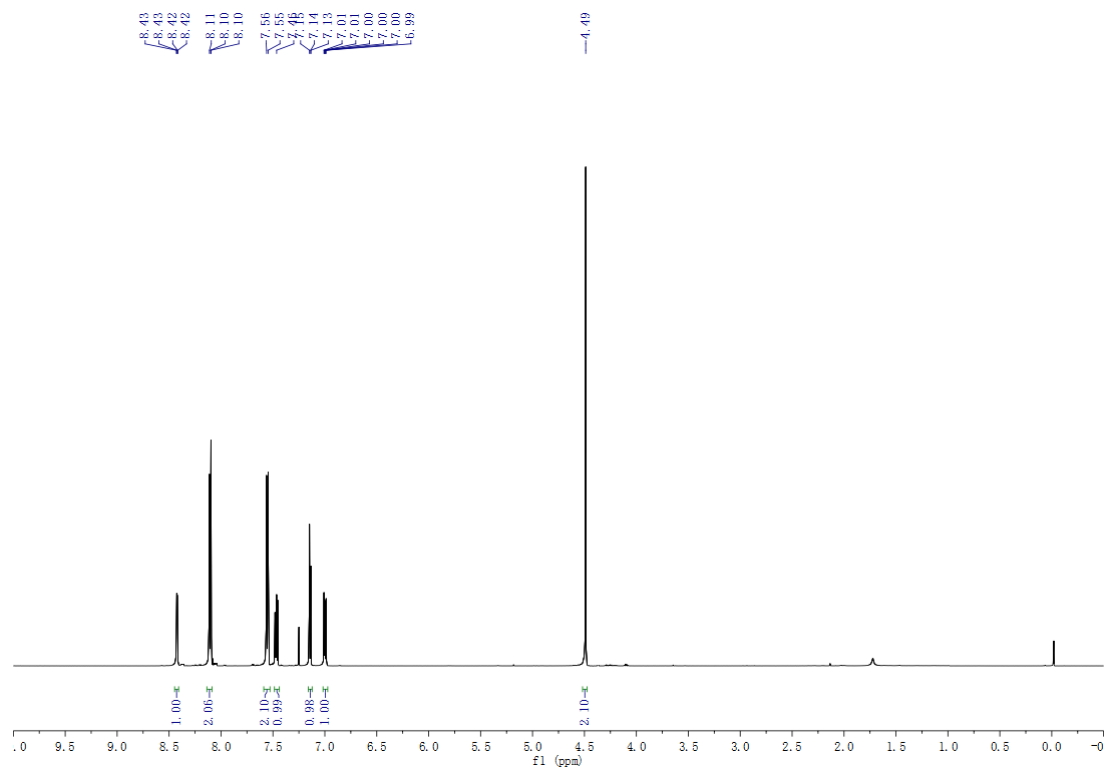

$^{13}\text{C NMR}$  ( $\text{CDCl}_3$ , 150 MHz)

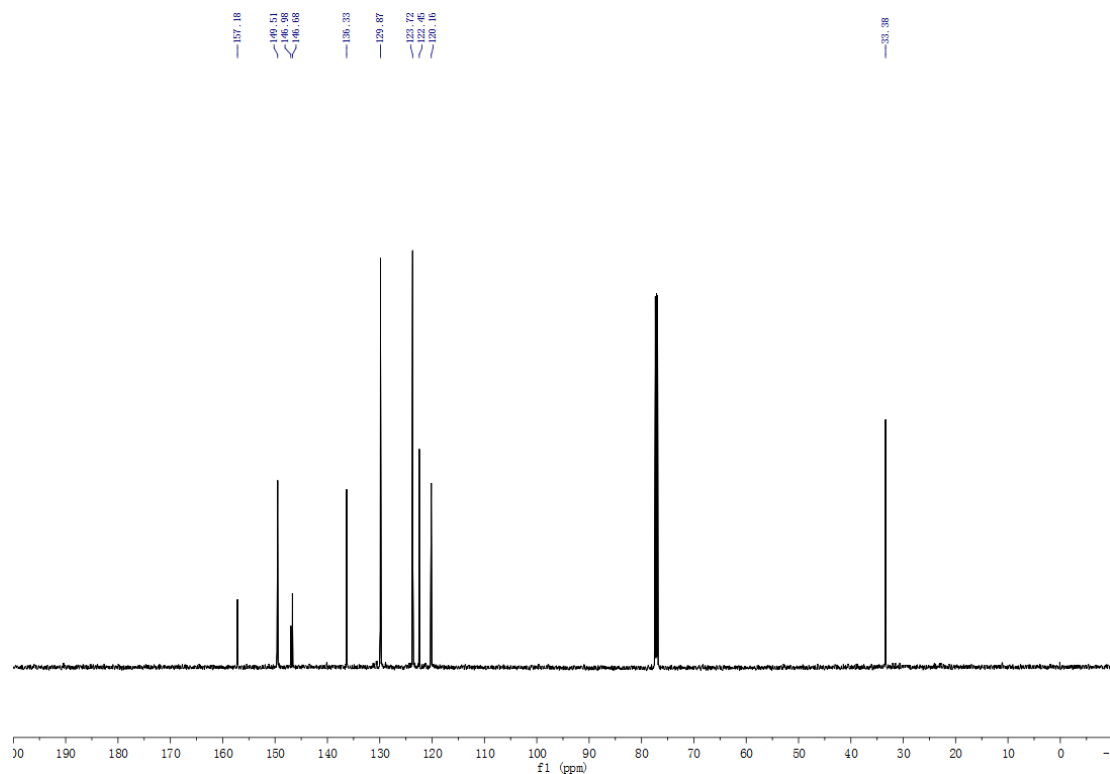



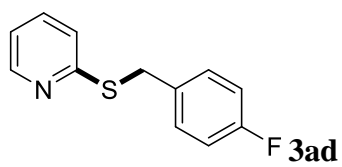

$^1\text{H NMR}$  ( $\text{CDCl}_3$ , 600 MHz)

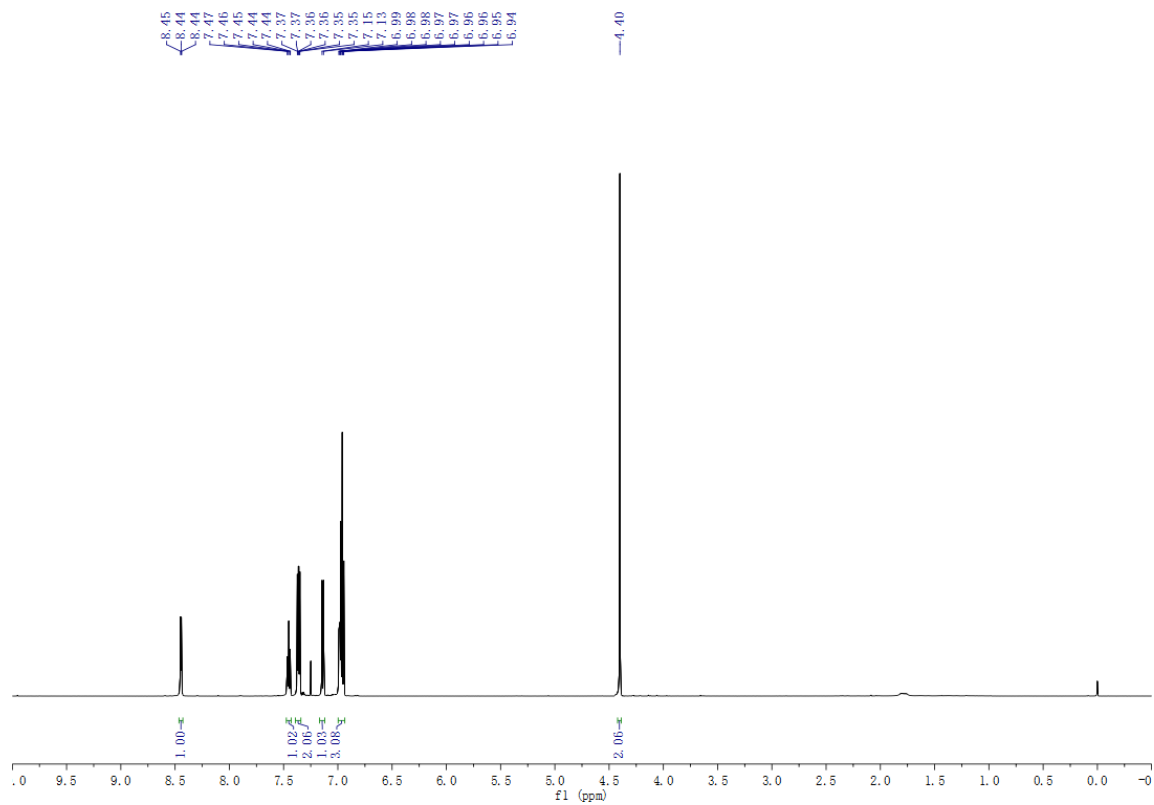

$^{13}\text{C NMR}$  ( $\text{CDCl}_3$ , 150 MHz)

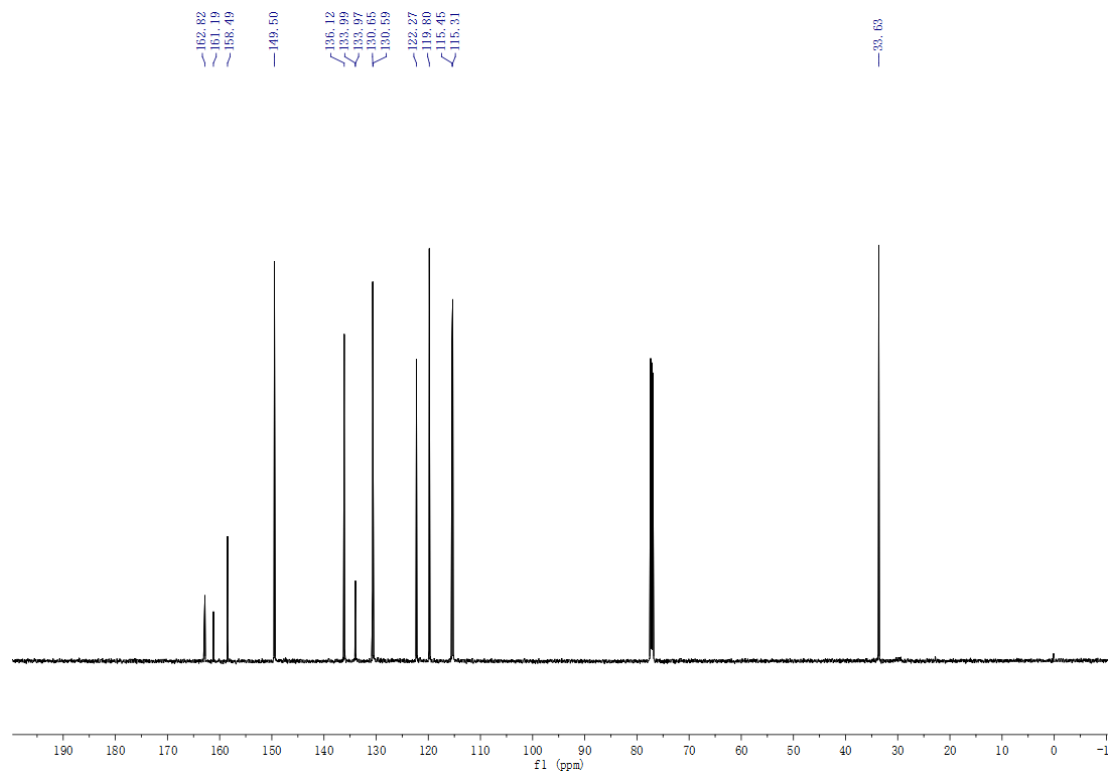

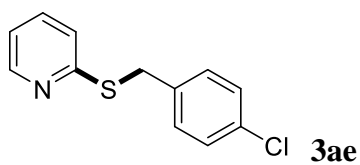

$^1\text{H}$  NMR ( $\text{CDCl}_3$ , 600 MHz)

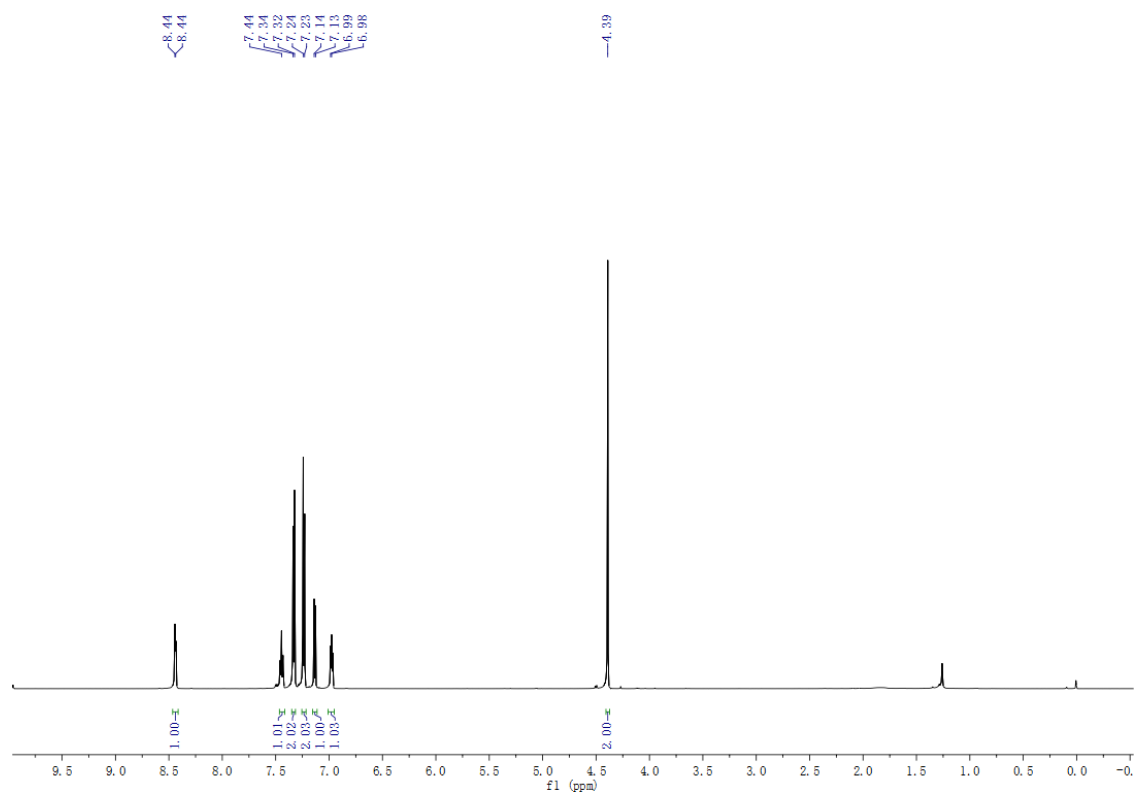

$^{13}\text{C}$  NMR ( $\text{CDCl}_3$ , 150 MHz)

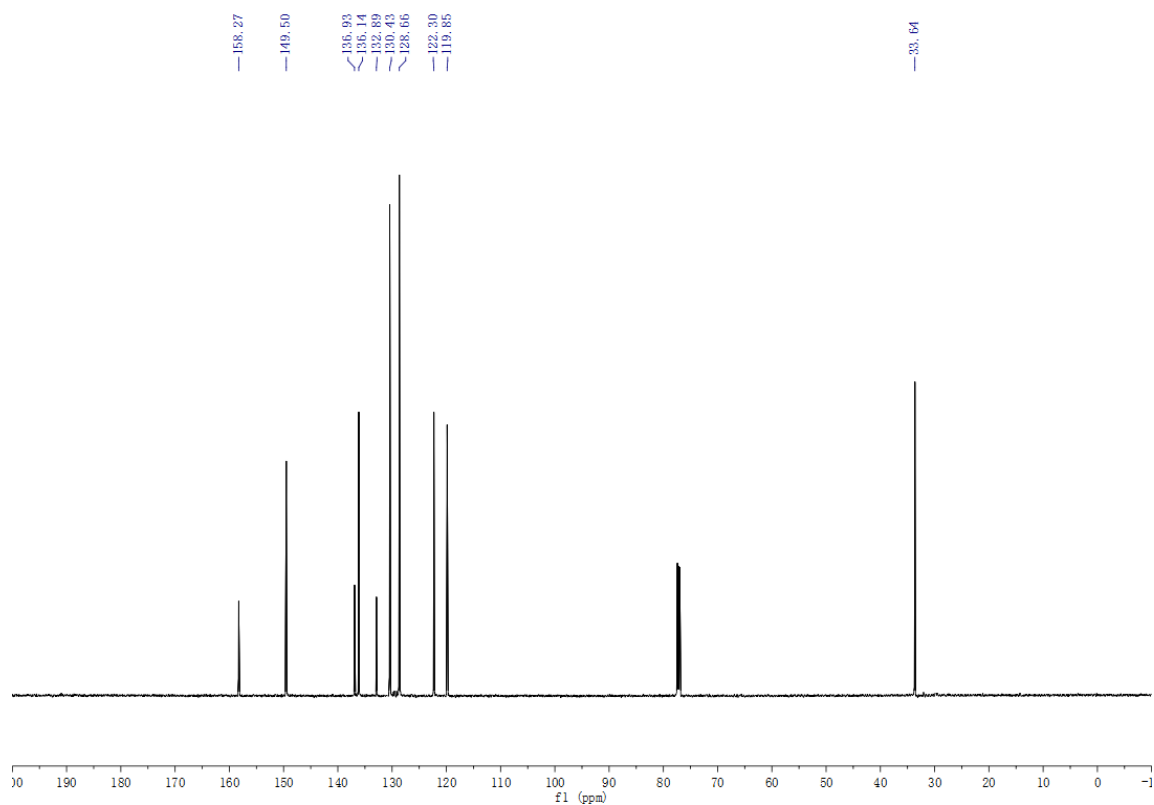

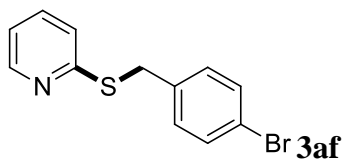

$^1\text{H NMR}$  ( $\text{CDCl}_3$ , 600 M Hz)

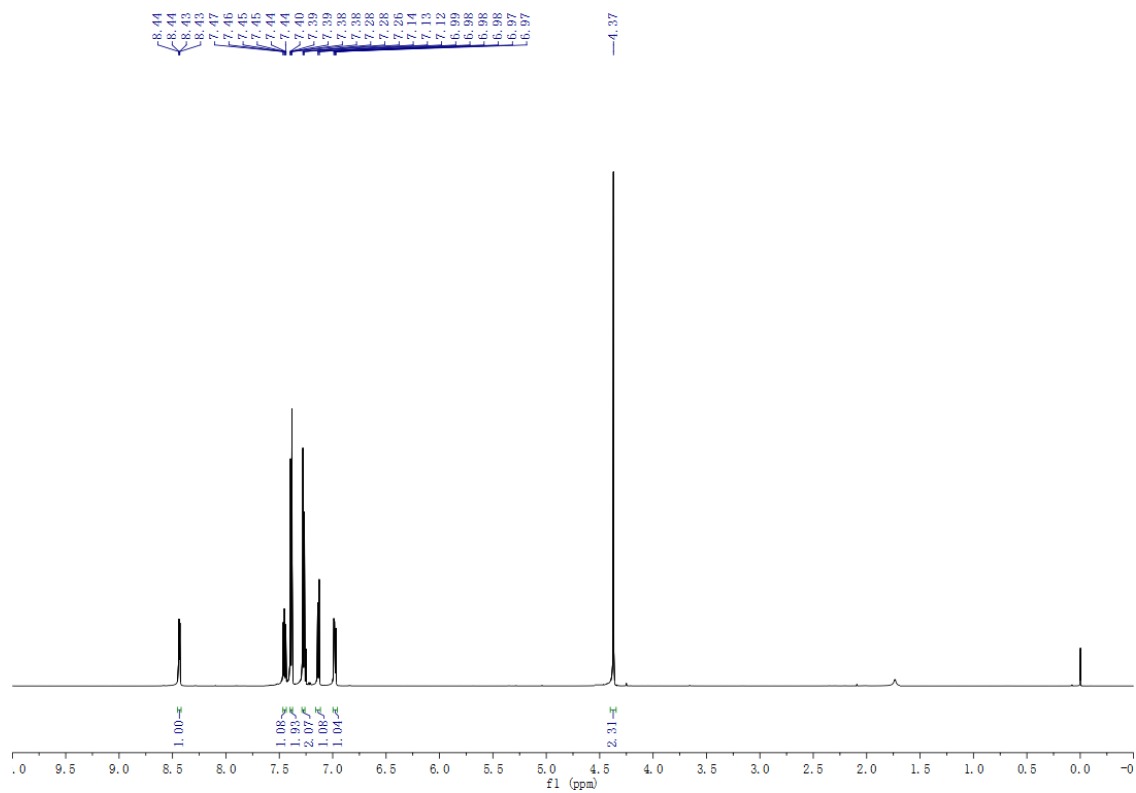

$^{13}\text{C NMR}$  ( $\text{CDCl}_3$ , 150 M Hz)

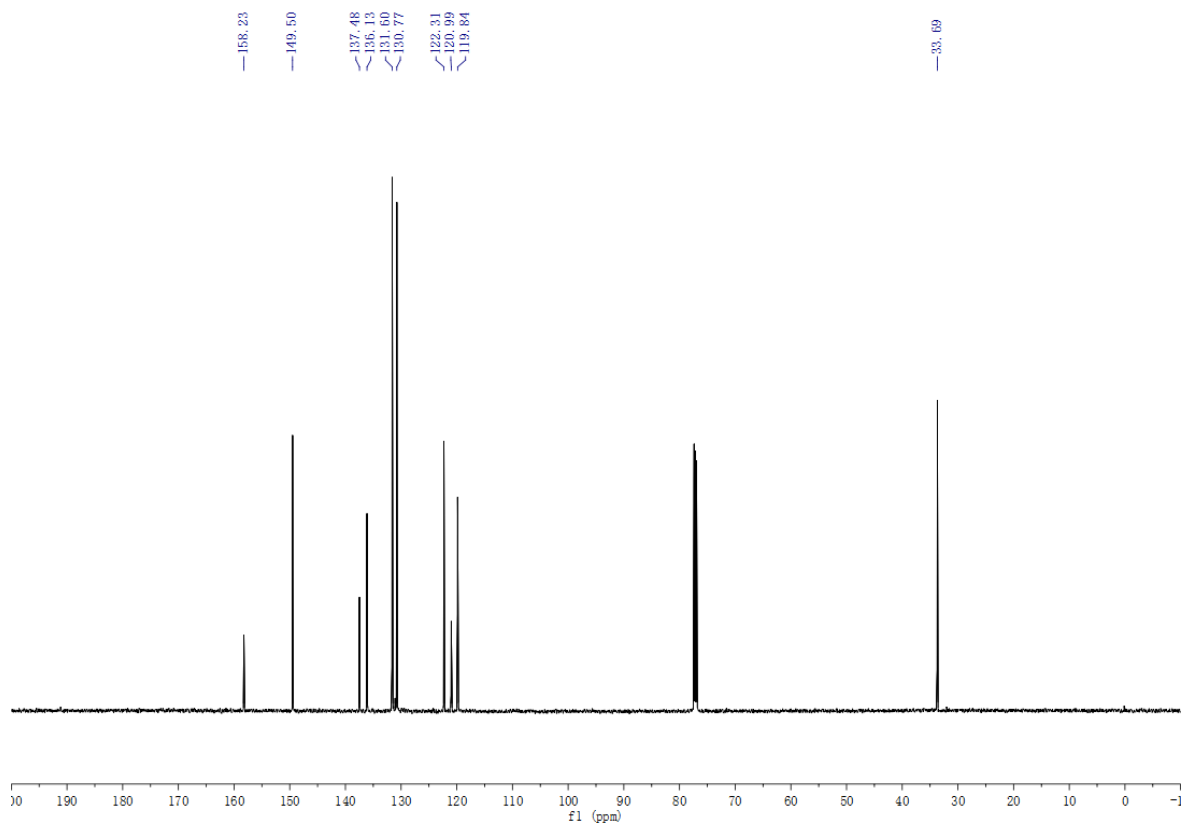

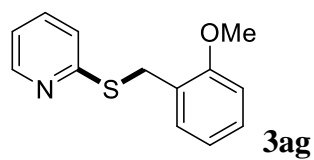

$^1\text{H NMR}$  ( $\text{CDCl}_3$ , 600 MHz)

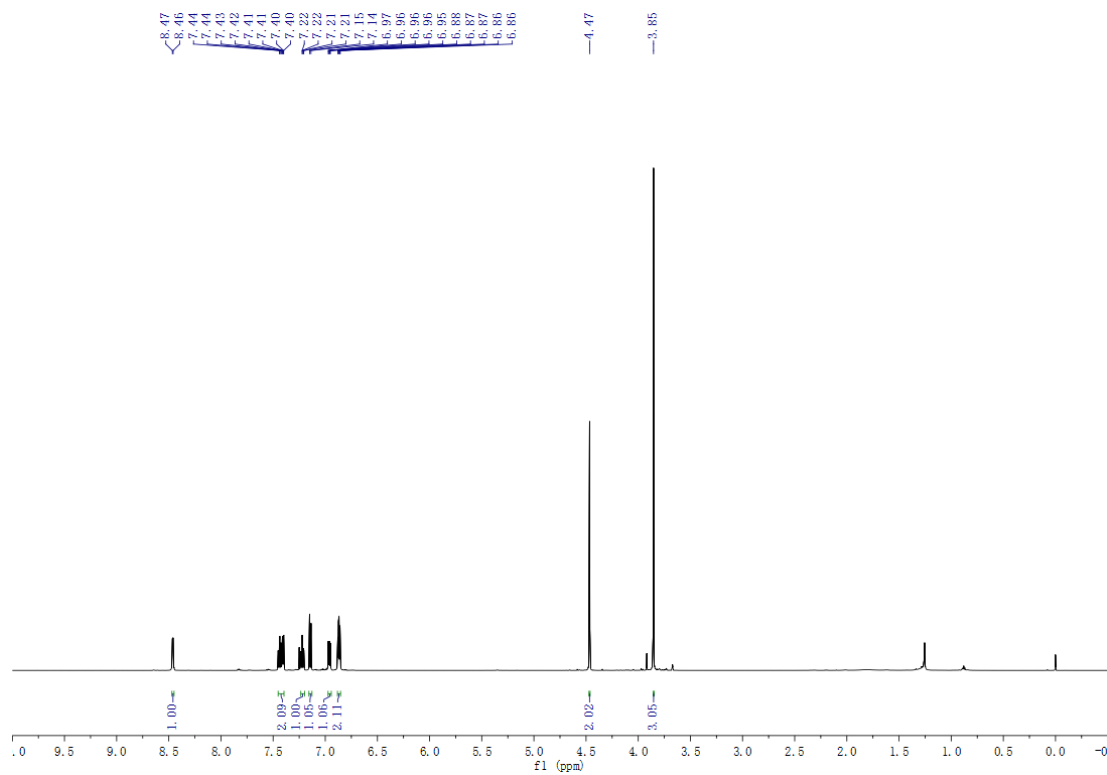

$^{13}\text{C NMR}$  ( $\text{CDCl}_3$ , 150 MHz)

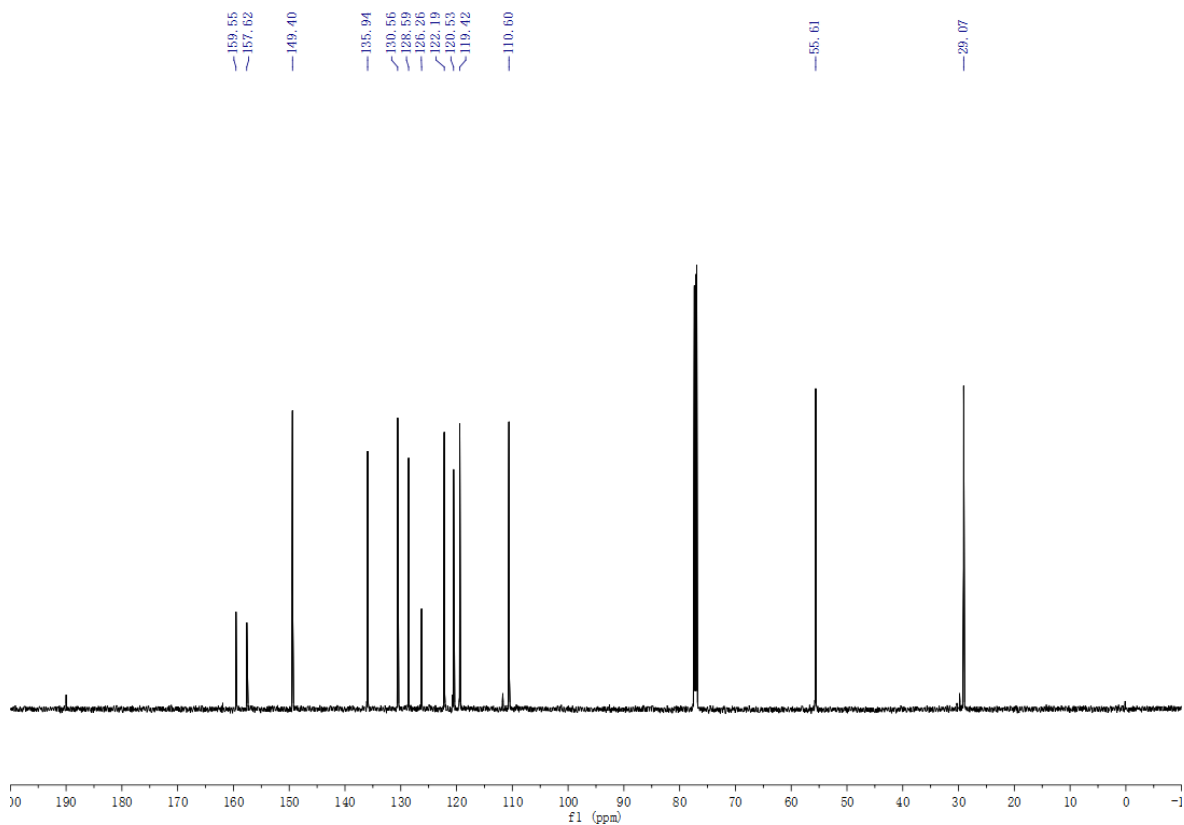

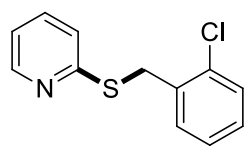**3ah**<sup>1</sup>H NMR (CDCl<sub>3</sub>, 600 M Hz)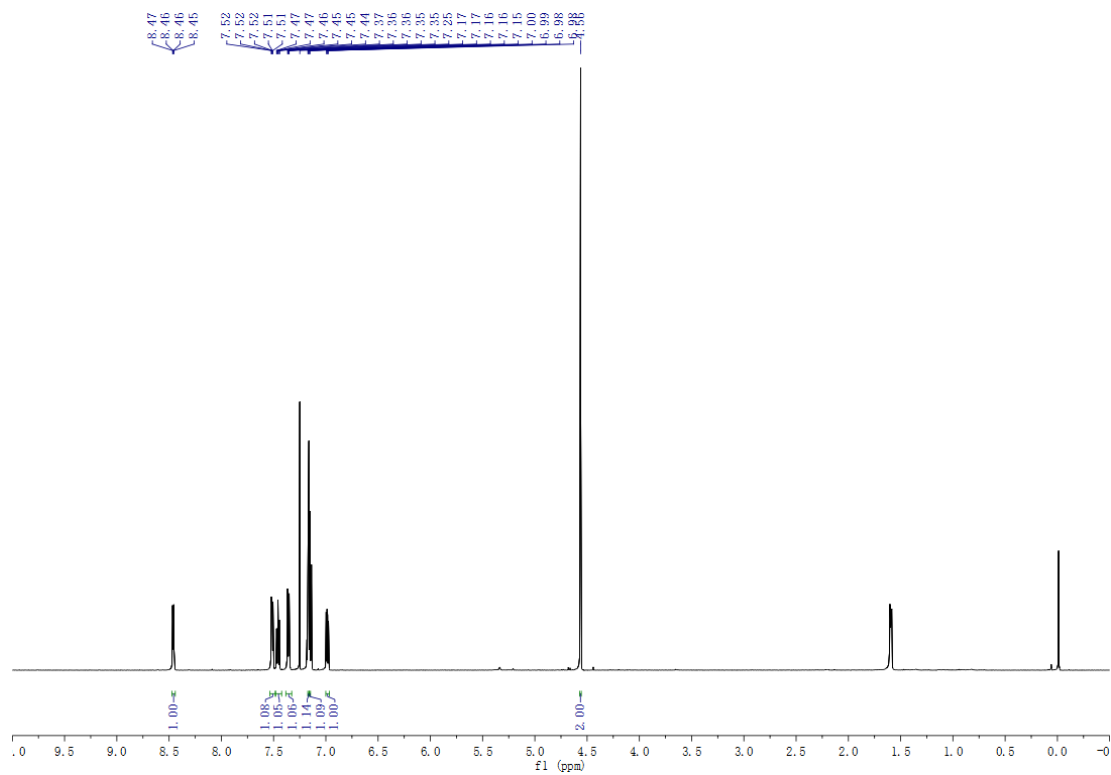<sup>13</sup>C NMR (CDCl<sub>3</sub>, 150 M Hz)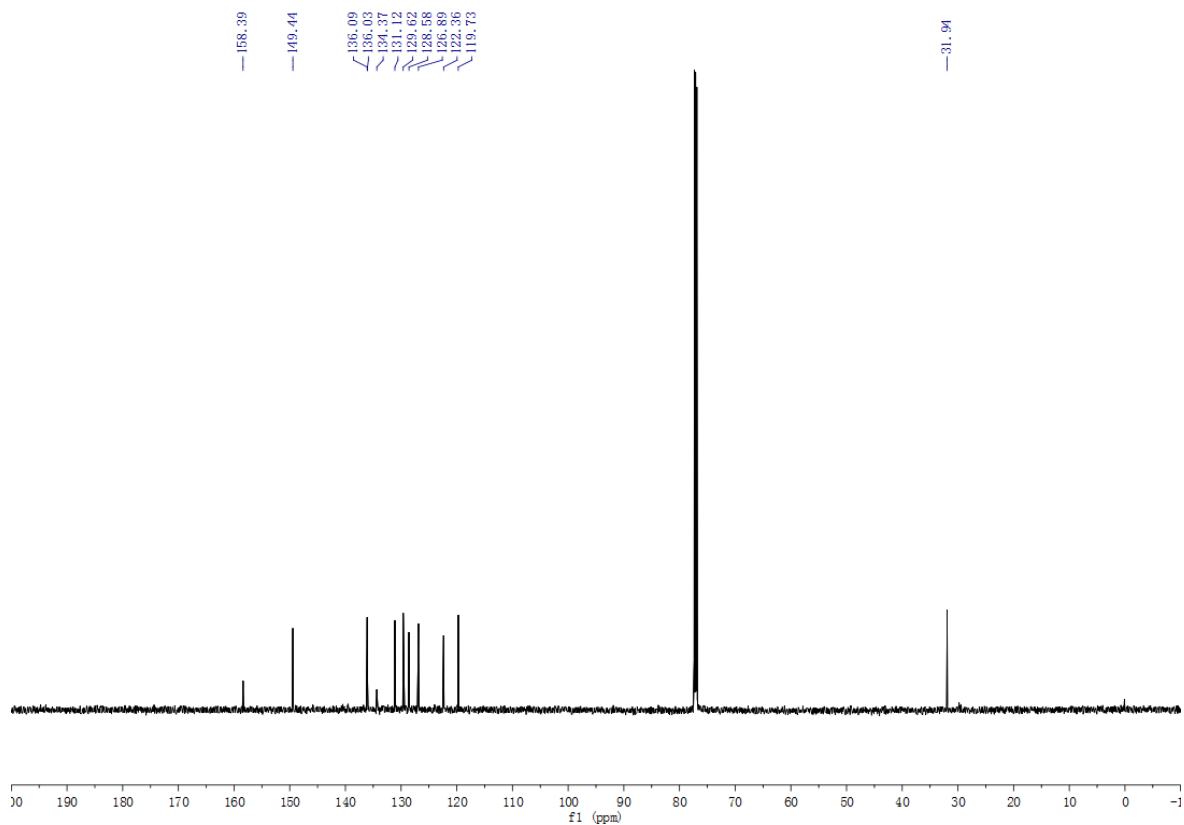

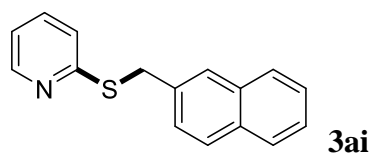

$^1\text{H}$  NMR ( $\text{CDCl}_3$ , 600 MHz)

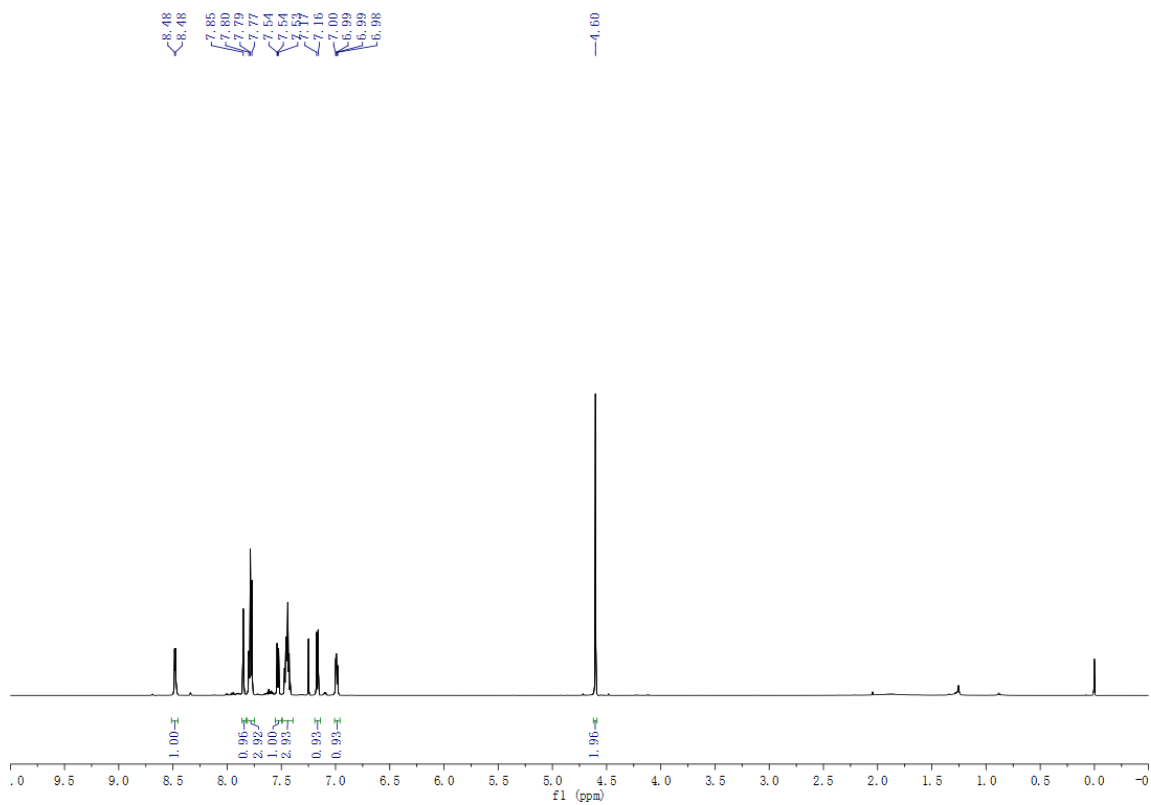

$^{13}\text{C}$  NMR ( $\text{CDCl}_3$ , 150 MHz)

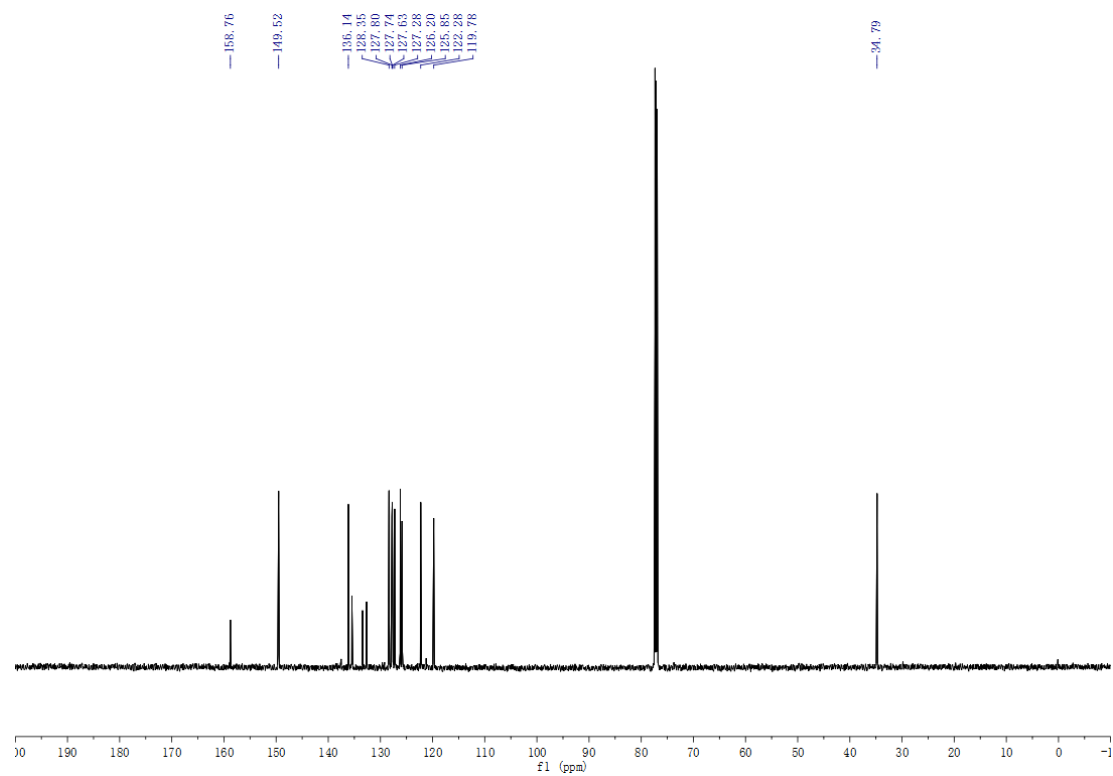

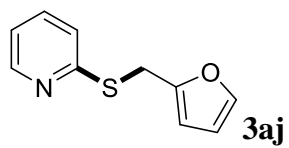

$^1\text{H}$  NMR ( $\text{CDCl}_3$ , 600 M Hz)

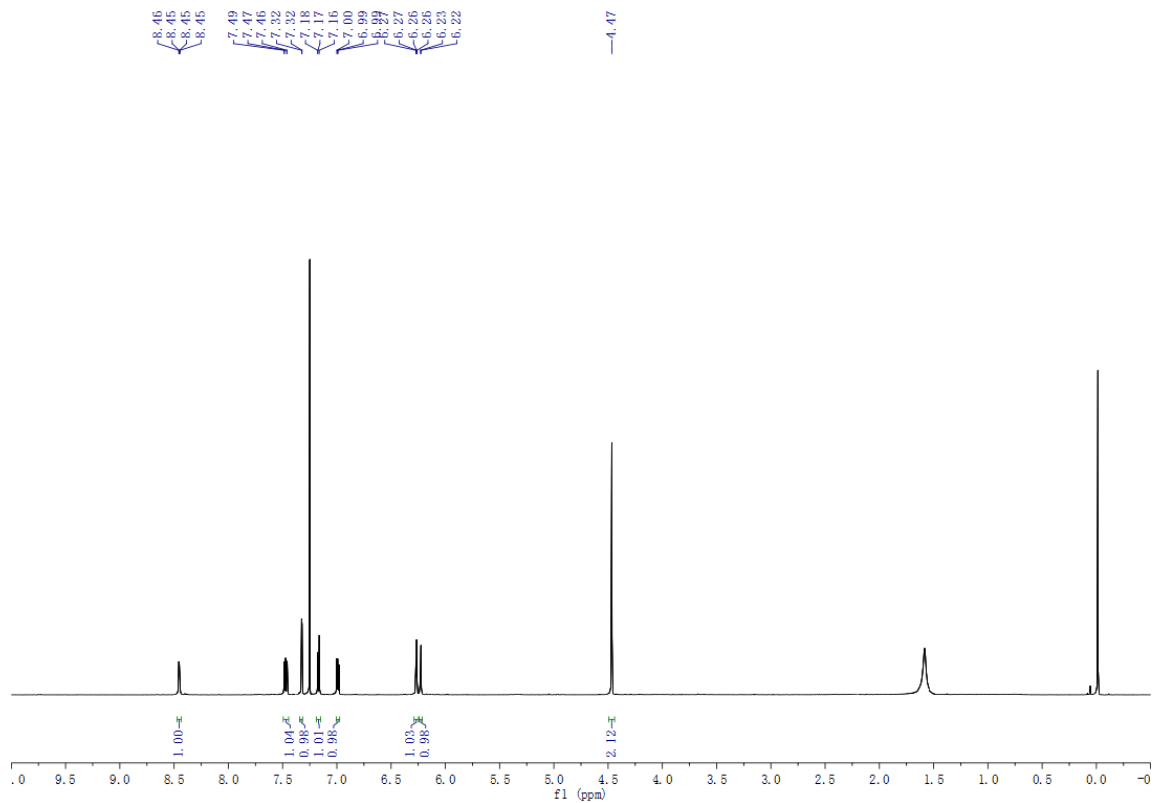

$^{13}\text{C}$  NMR ( $\text{CDCl}_3$ , 150 M Hz)

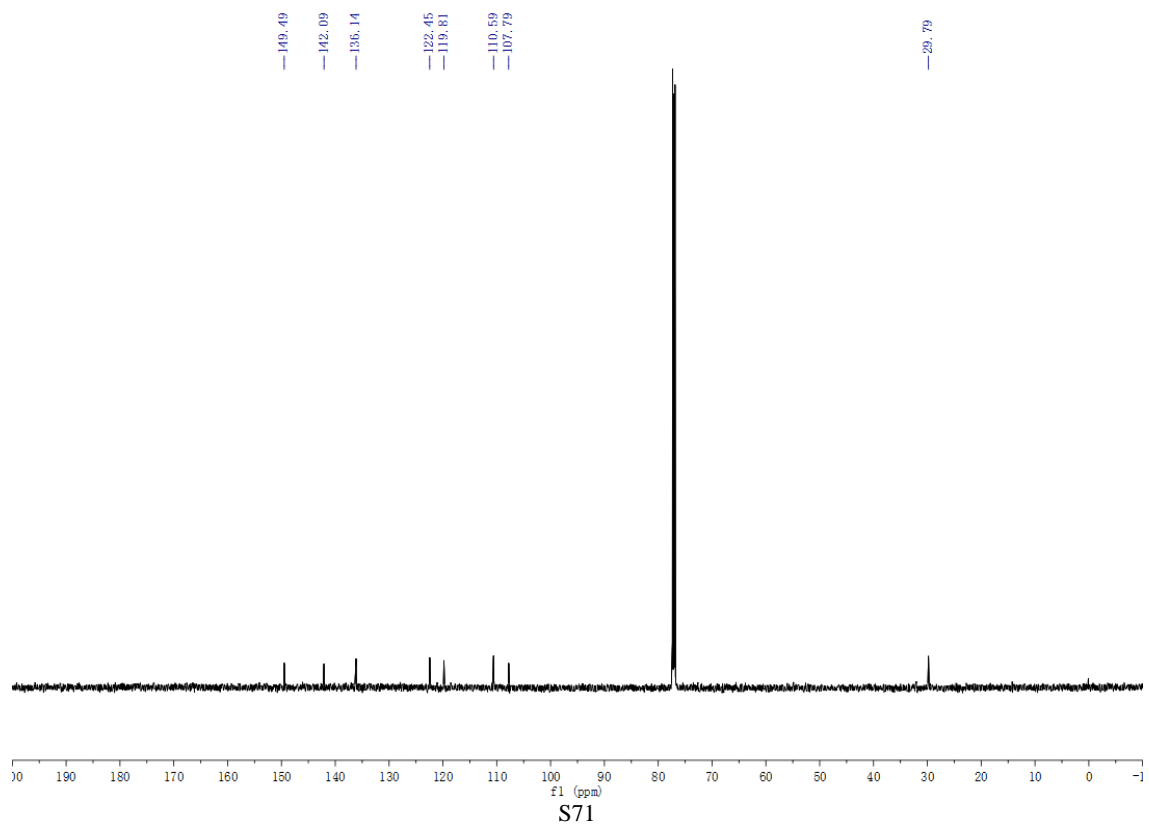





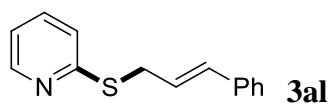

$^1\text{H}$  NMR ( $\text{CDCl}_3$ , 600 M Hz)

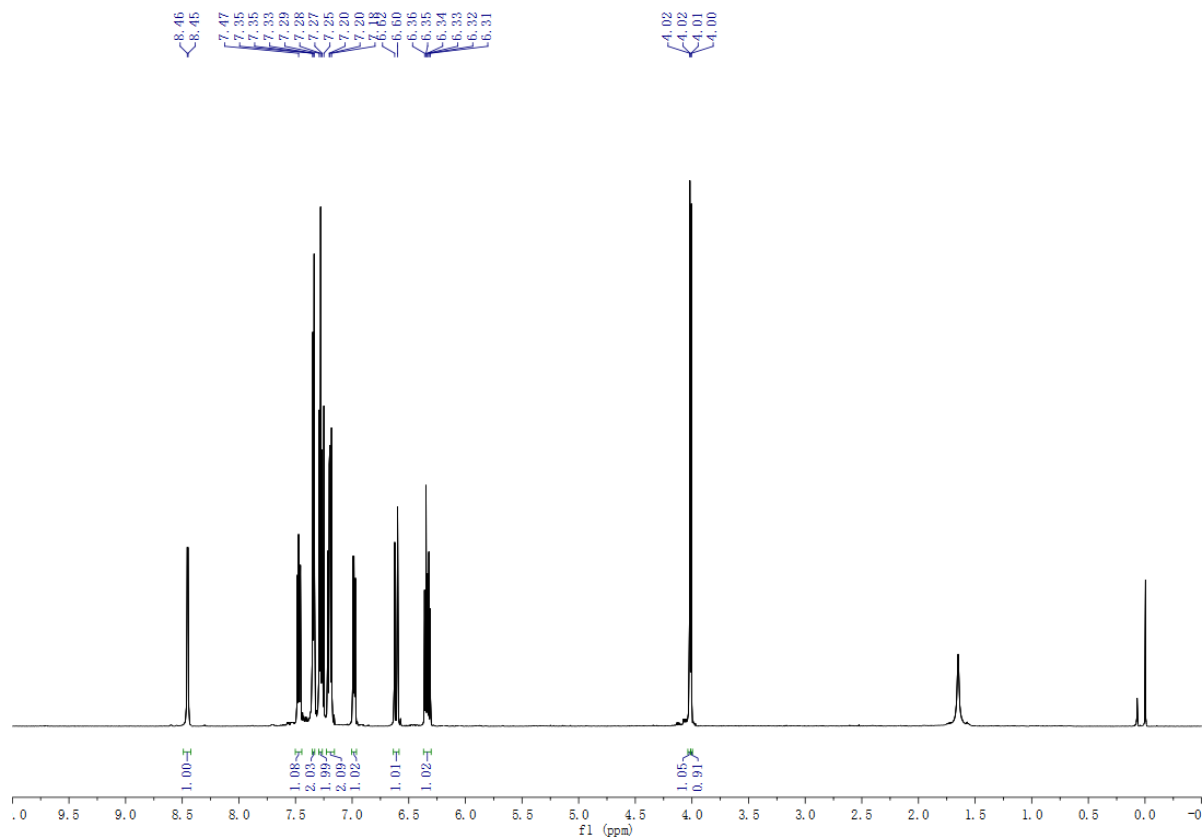

$^{13}\text{C}$  NMR ( $\text{CDCl}_3$ , 150 M Hz)

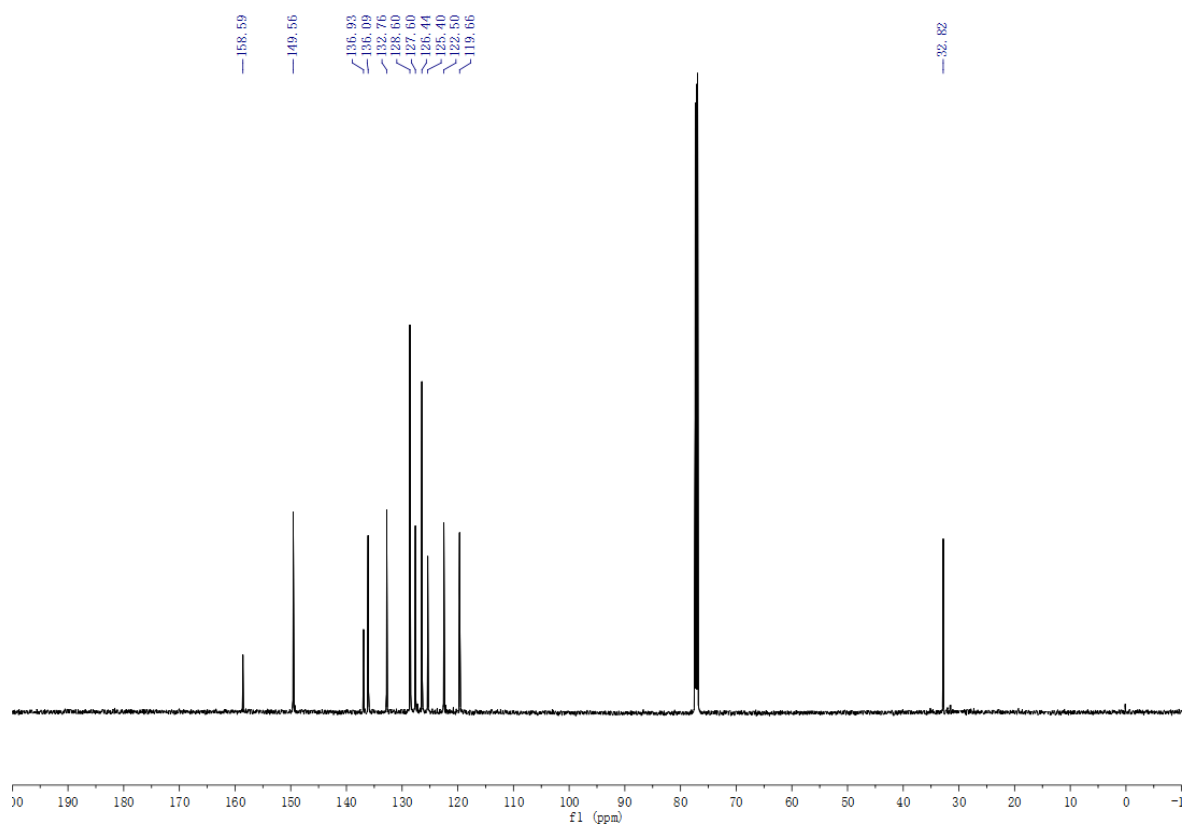

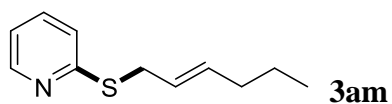

$^1\text{H}$  NMR ( $\text{CDCl}_3$ , 600 M Hz)

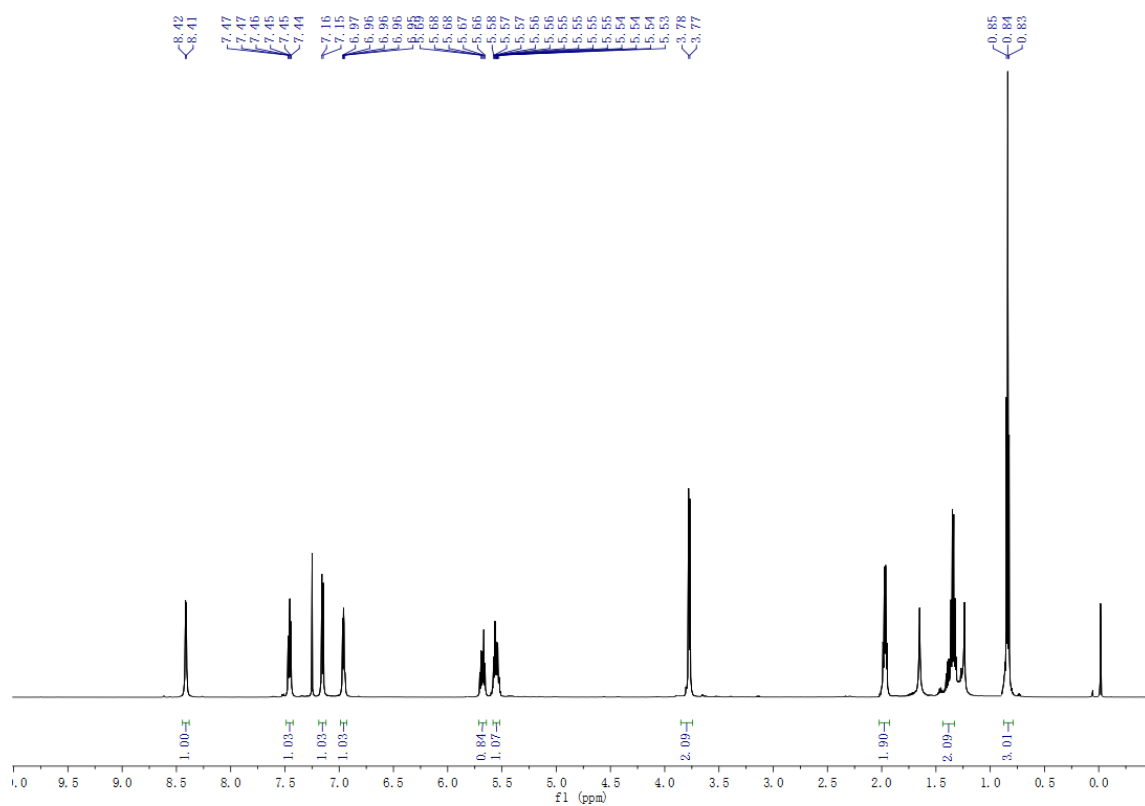

$^{13}\text{C}$  NMR ( $\text{CDCl}_3$ , 150 M Hz)

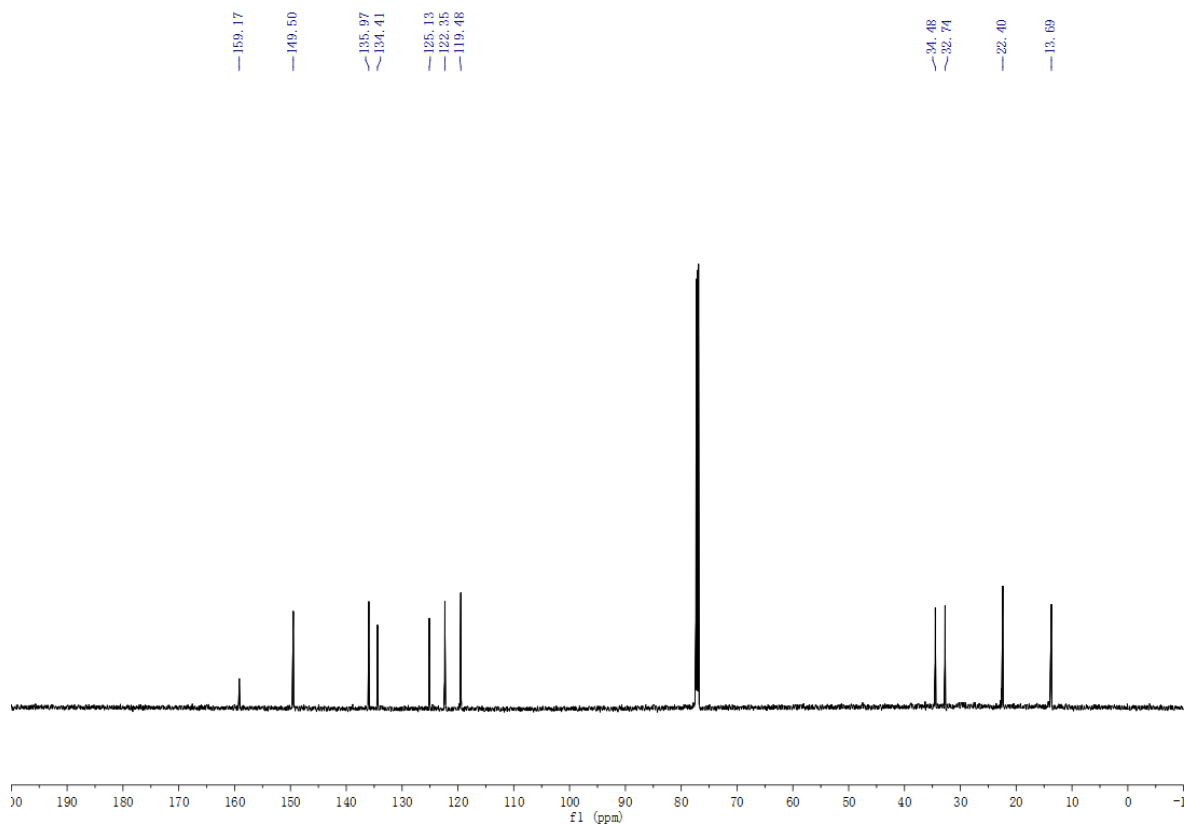

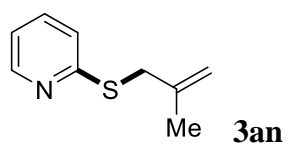

$^1\text{H}$  NMR ( $\text{CDCl}_3$ , 600 MHz)

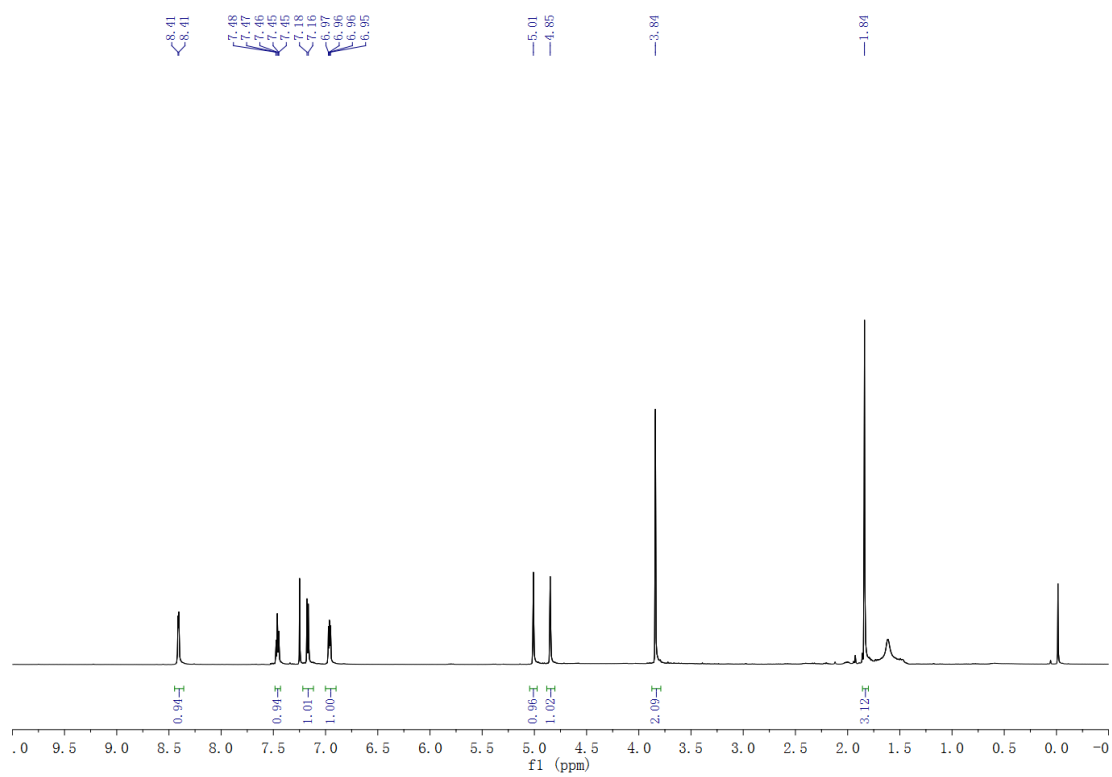

$^{13}\text{C}$  NMR ( $\text{CDCl}_3$ , 150 MHz)

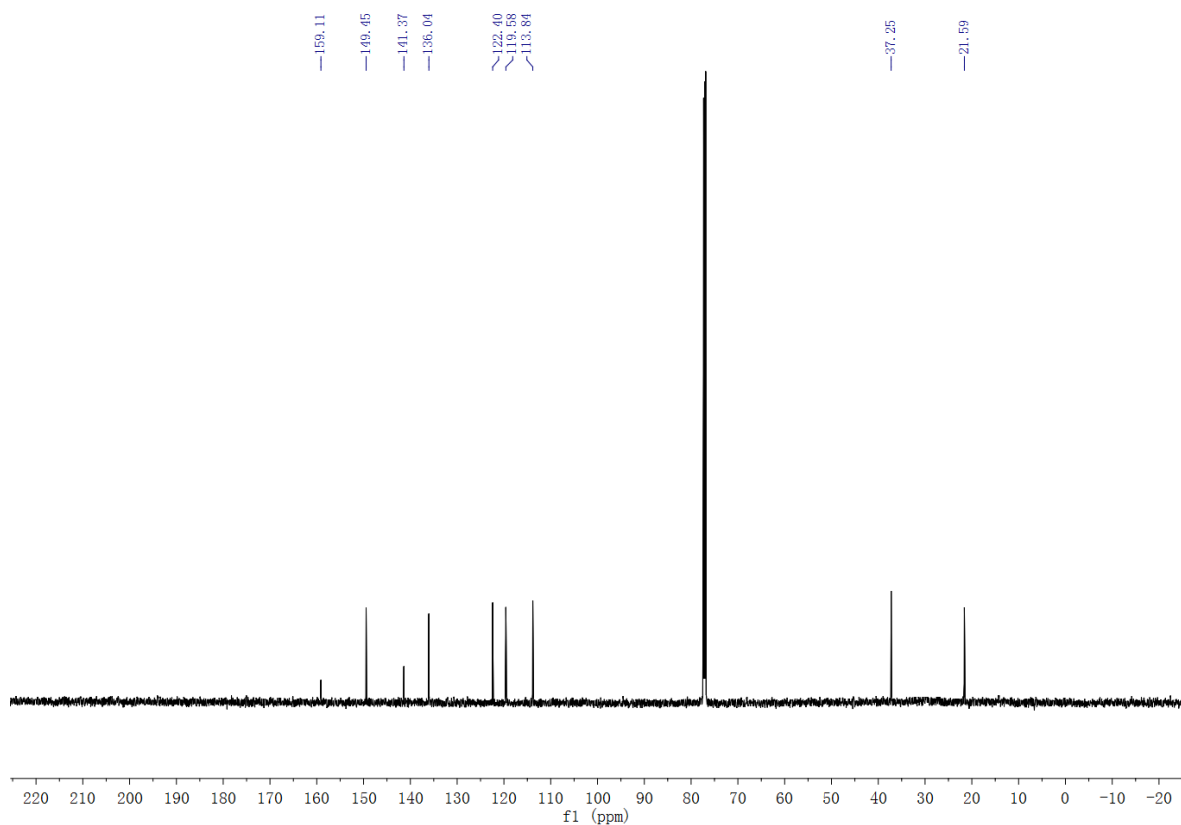

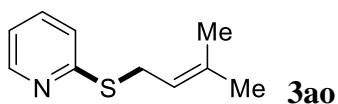

$^1\text{H}$  NMR ( $\text{CDCl}_3$ , 600 M Hz)

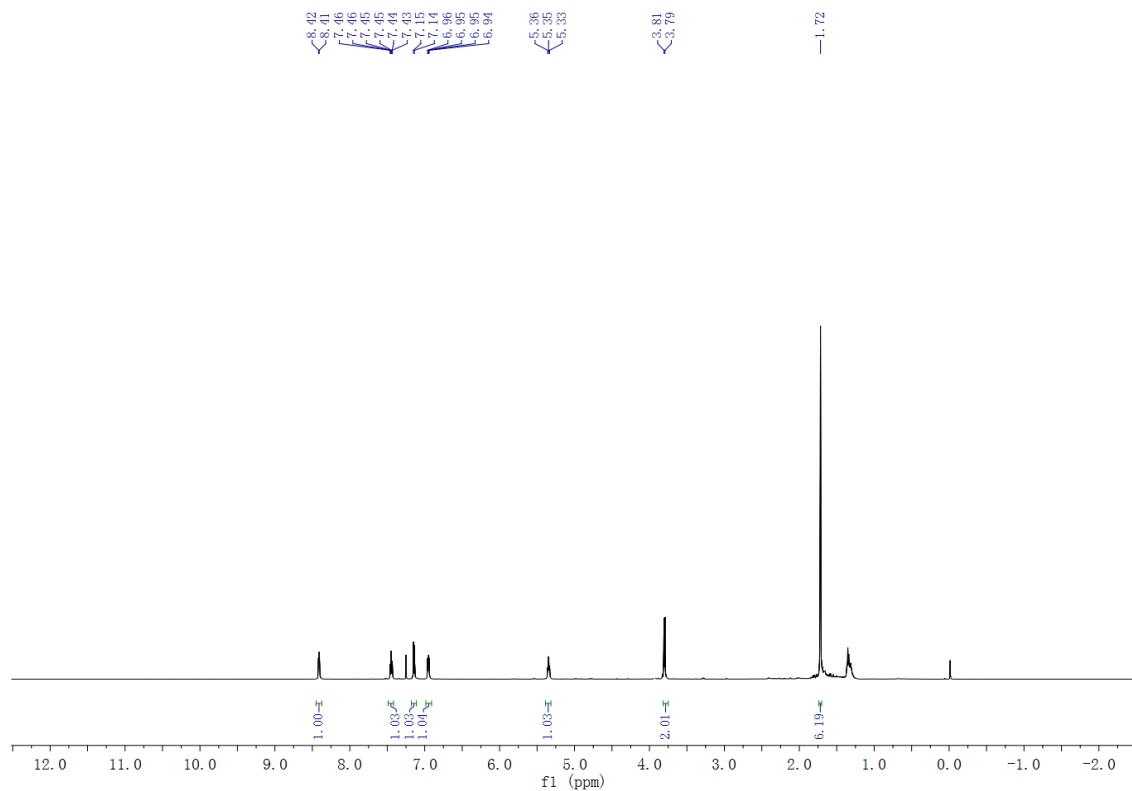

$^{13}\text{C}$  NMR ( $\text{CDCl}_3$ , 150 M Hz)

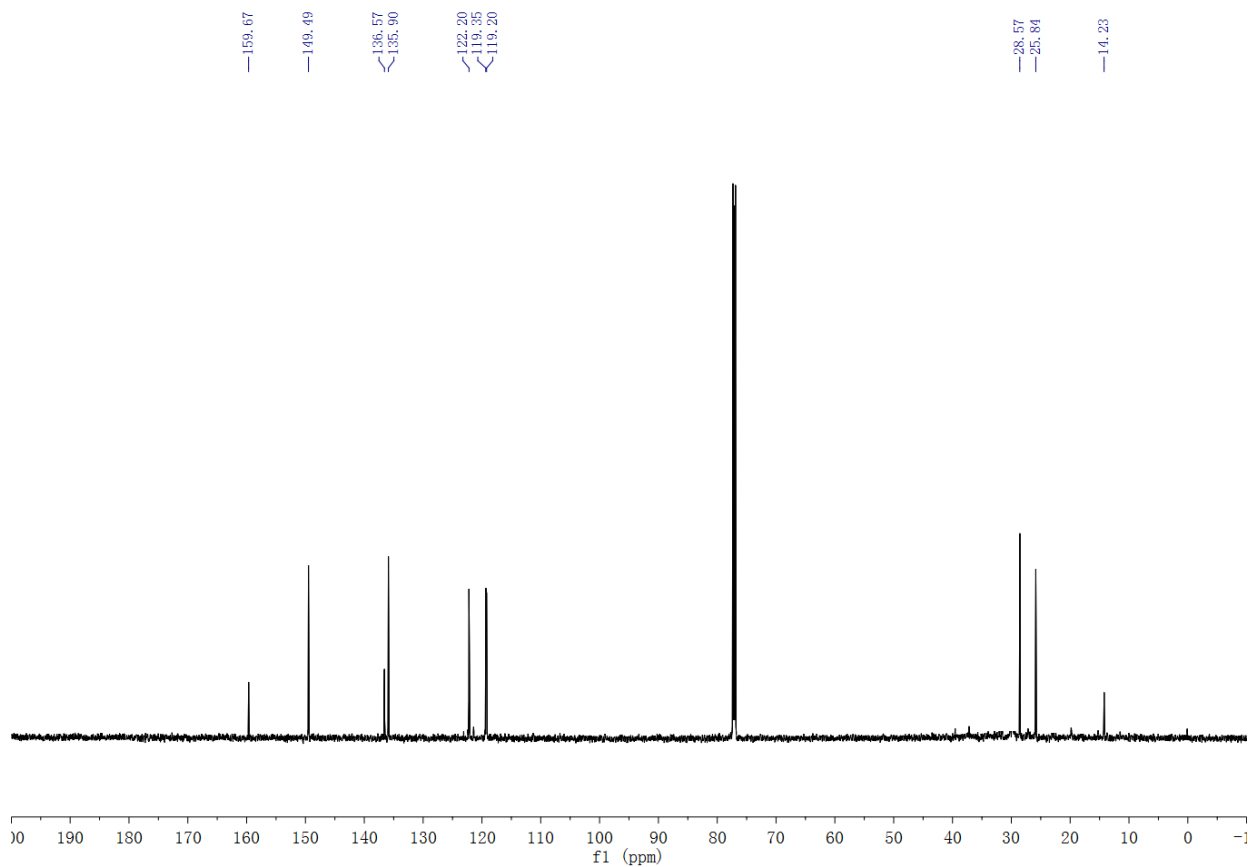

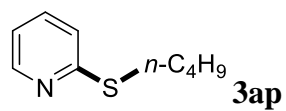

$^1\text{H}$  NMR ( $\text{CDCl}_3$ , 600 M Hz)

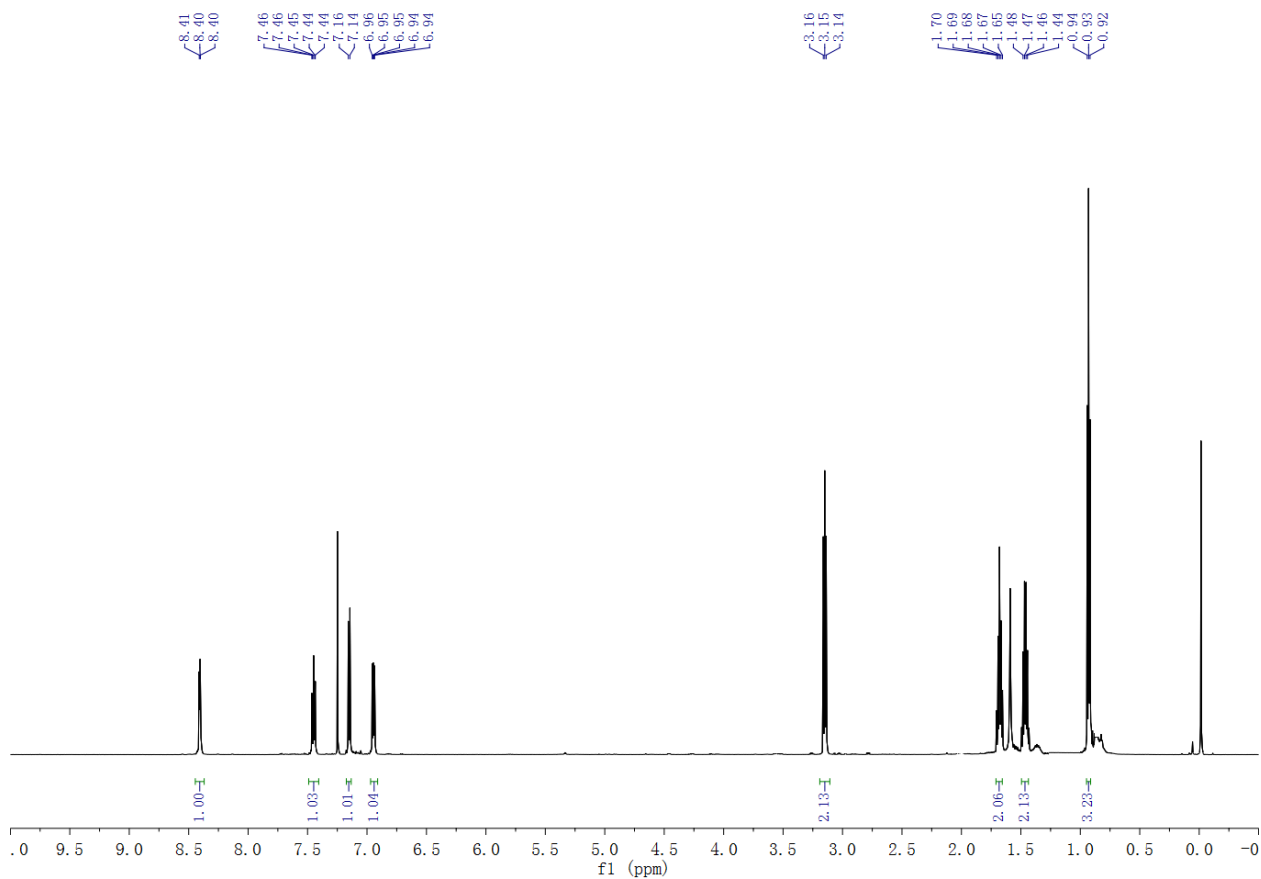

$^{13}\text{C}$  NMR ( $\text{CDCl}_3$ , 150 M Hz)

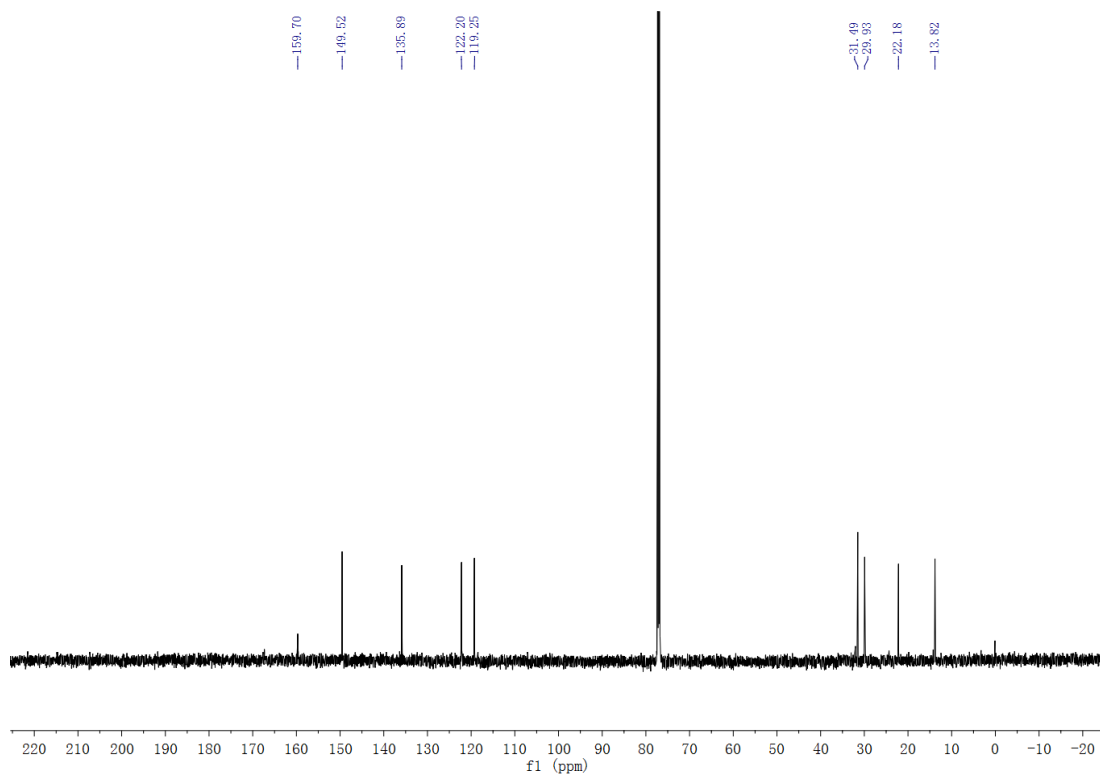

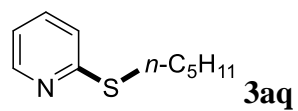

$^1\text{H NMR}$  ( $\text{CDCl}_3$ , 600 M Hz)

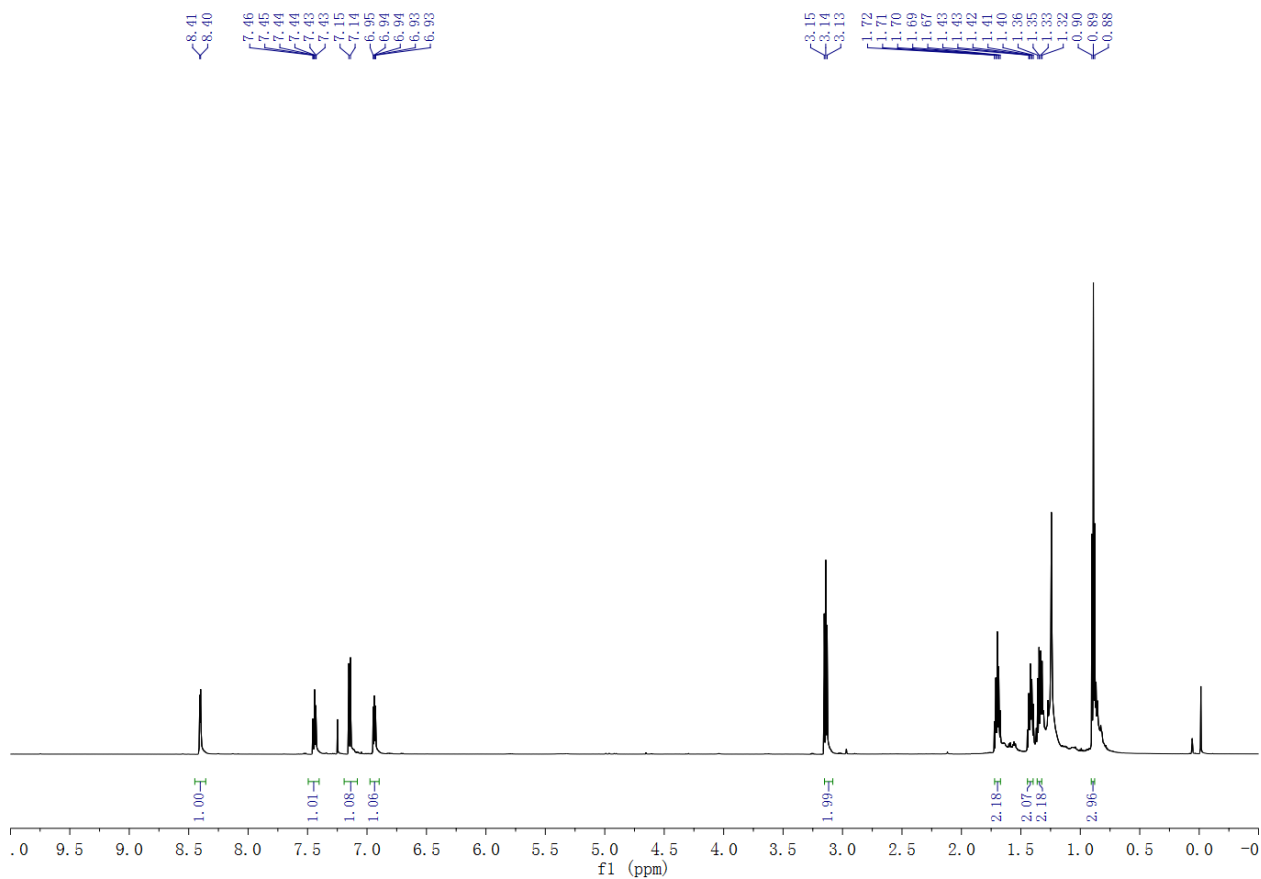

$^{13}\text{C NMR}$  ( $\text{CDCl}_3$ , 150 M Hz)

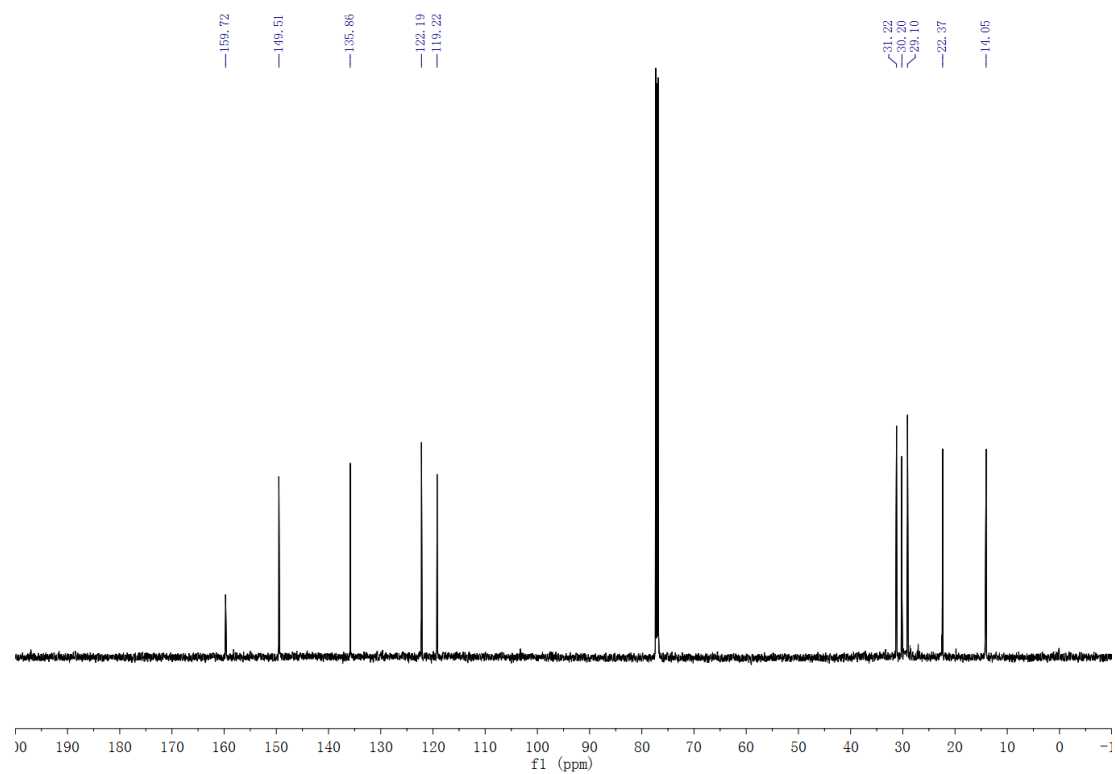

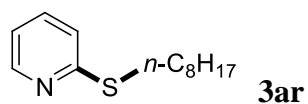

$^1\text{H NMR}$  ( $\text{CDCl}_3$ , 600 M Hz)

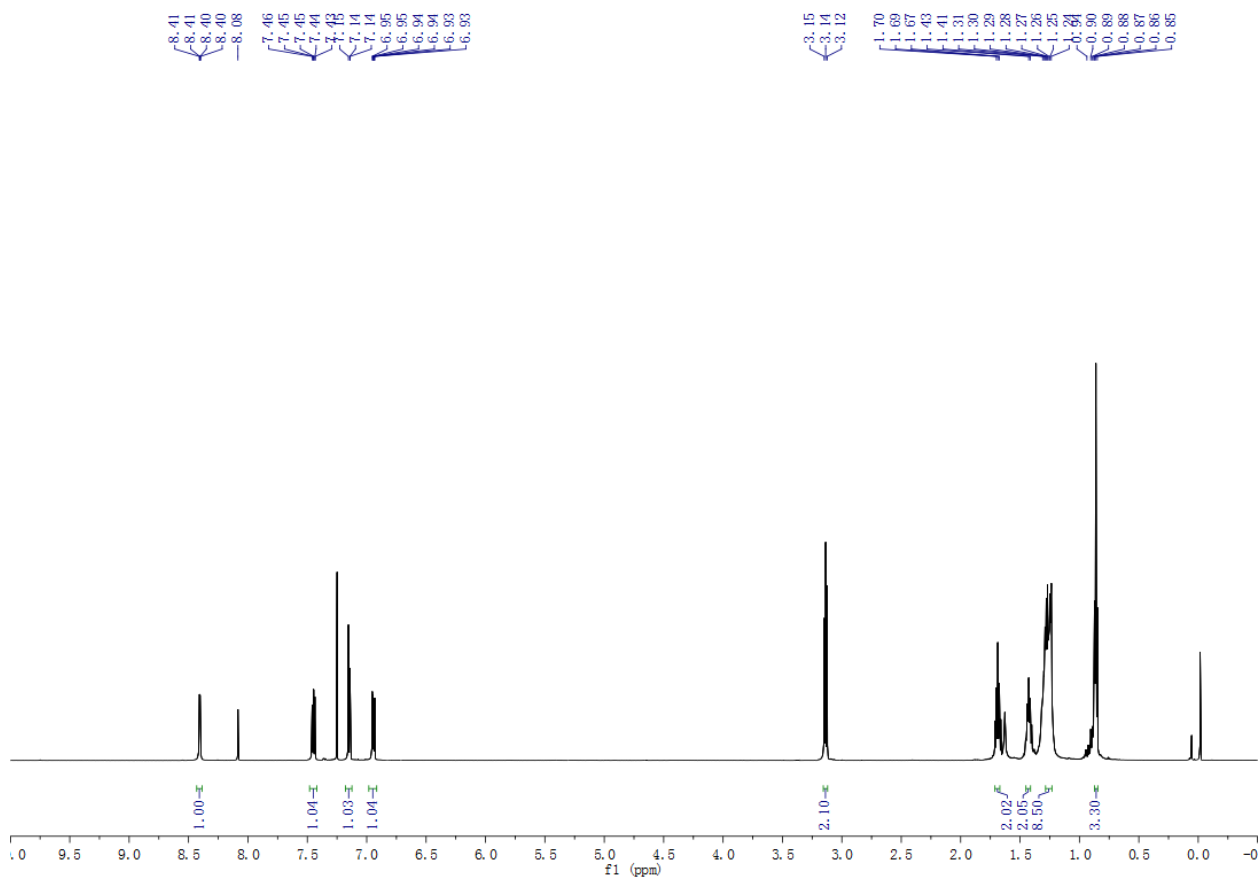

$^{13}\text{C NMR}$  ( $\text{CDCl}_3$ , 150 M Hz)

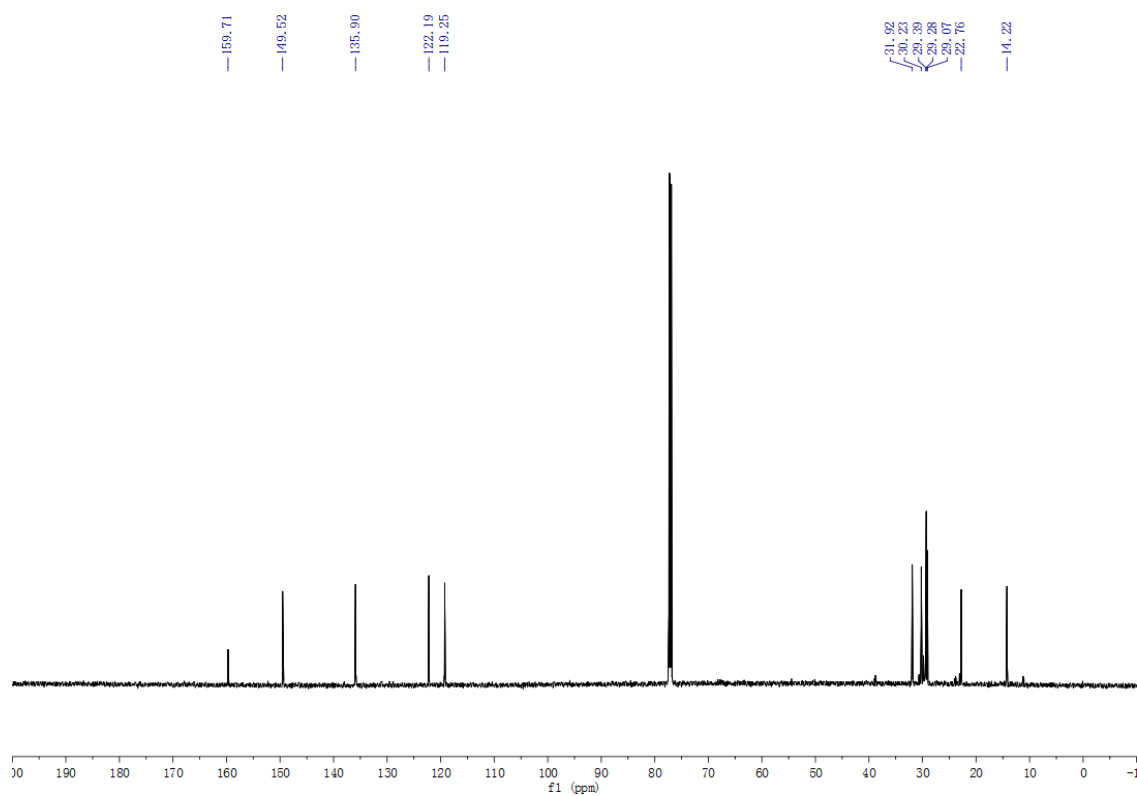

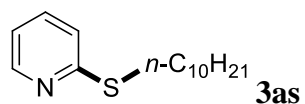

<sup>1</sup>H NMR (CDCl<sub>3</sub>, 600 M Hz)

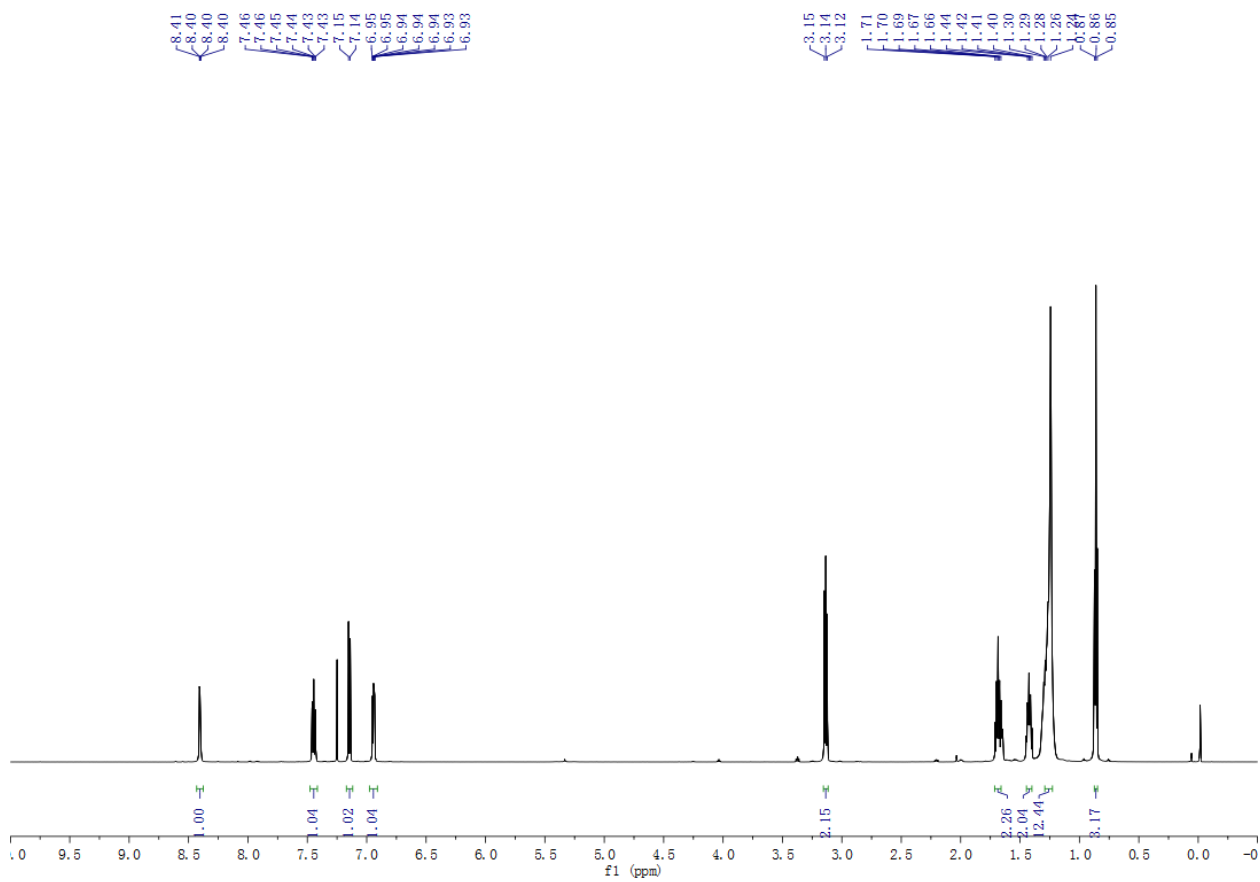

<sup>13</sup>C NMR (CDCl<sub>3</sub>, 150 M Hz)

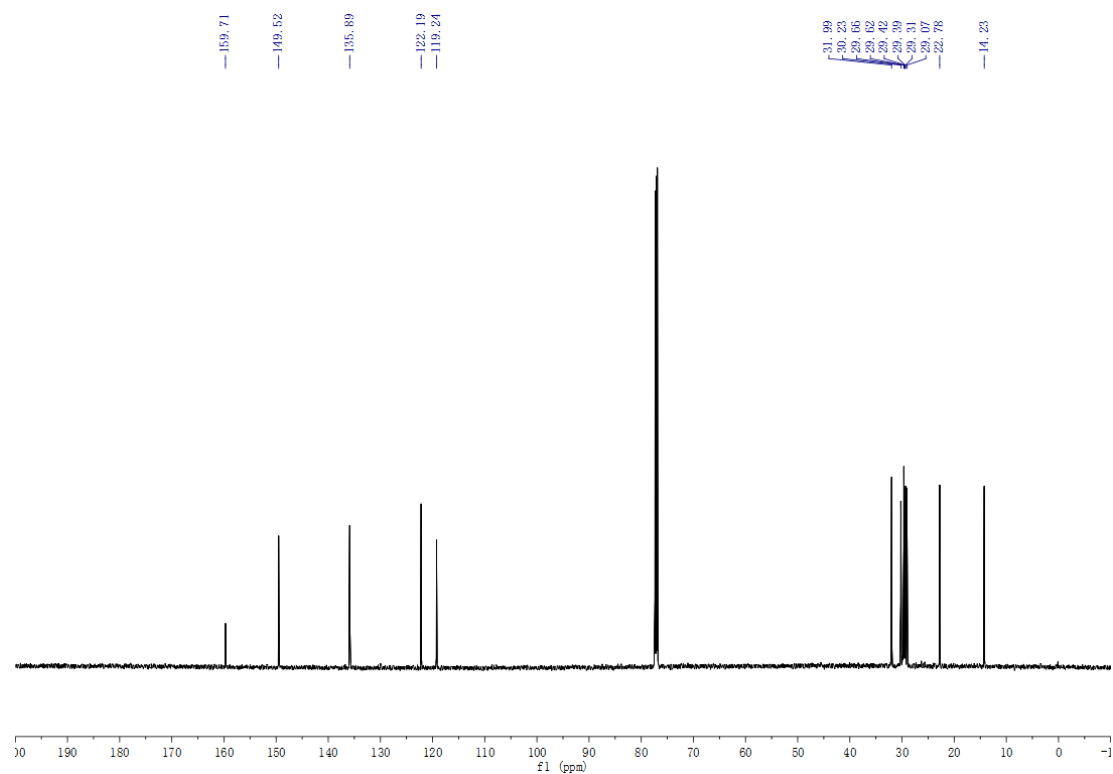



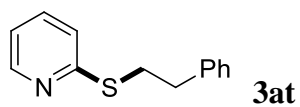

$^1\text{H NMR}$  ( $\text{CDCl}_3$ , 600 MHz)

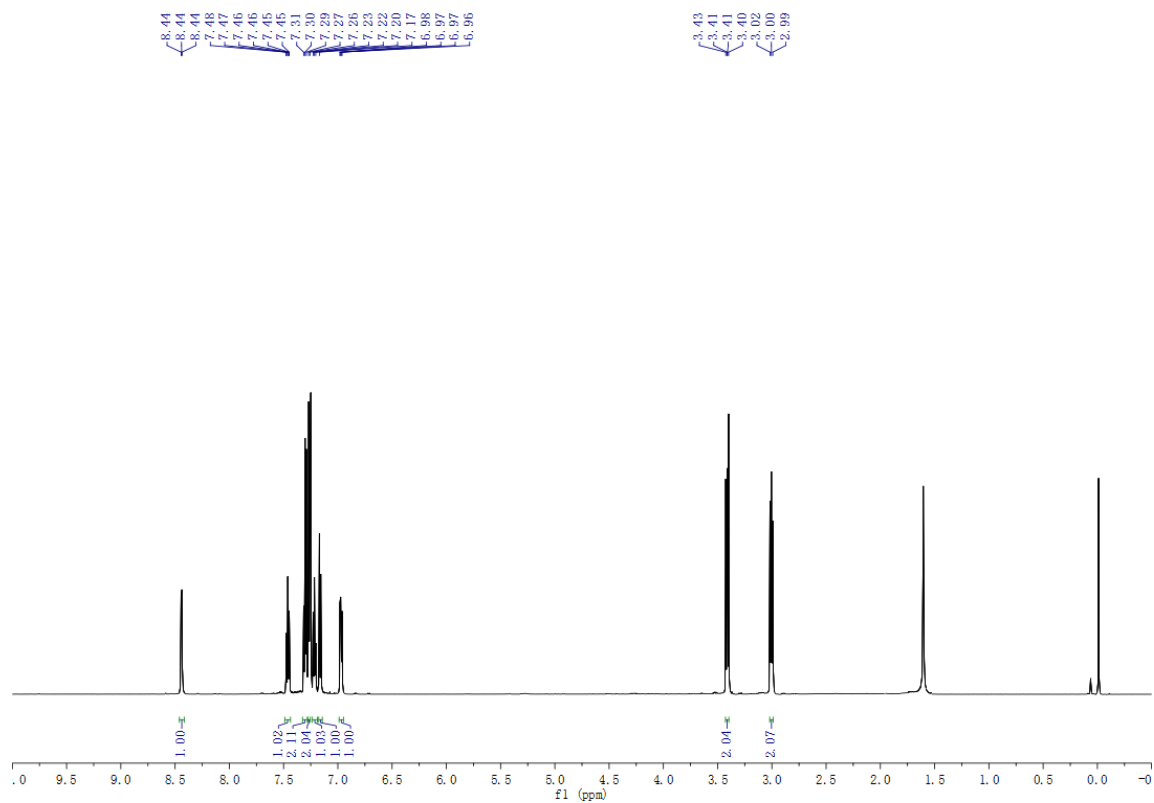

$^{13}\text{C NMR}$  ( $\text{CDCl}_3$ , 150 MHz)

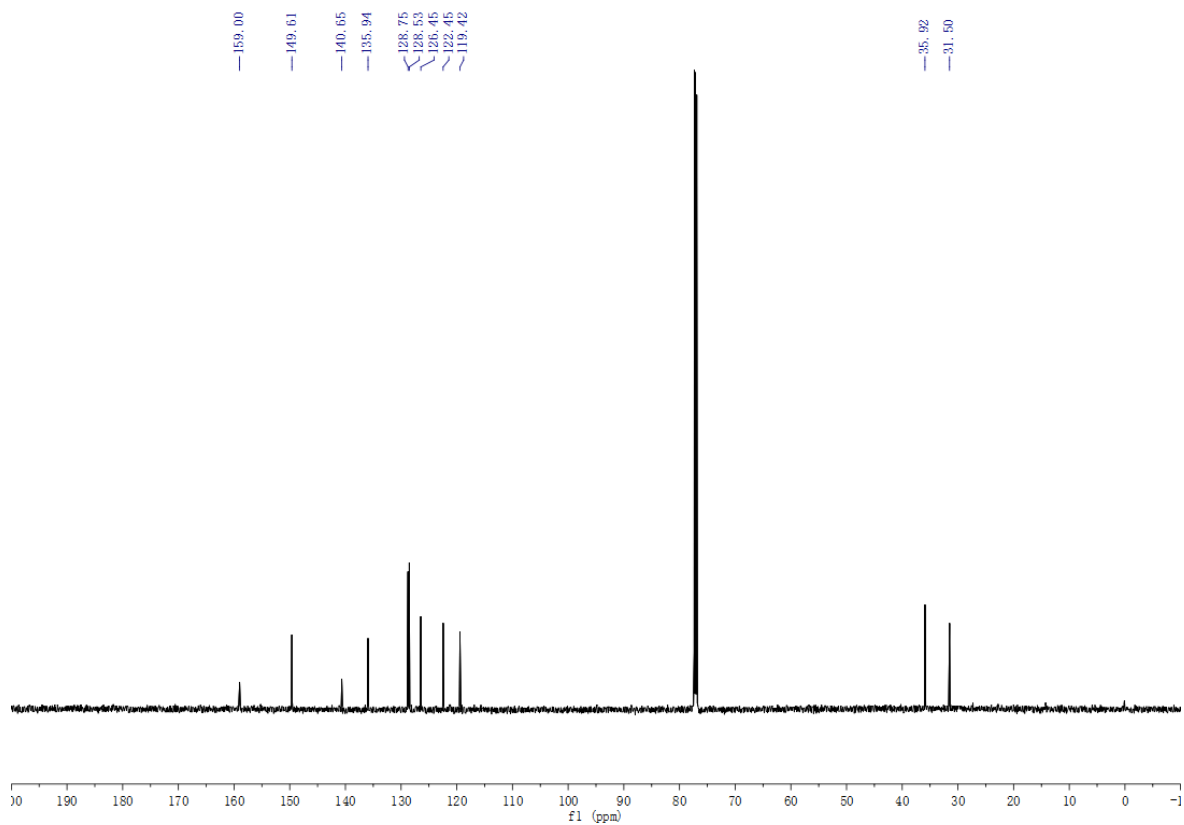

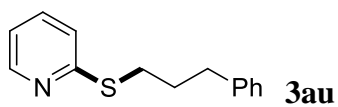

$^1\text{H}$  NMR ( $\text{CDCl}_3$ , 600 M Hz)

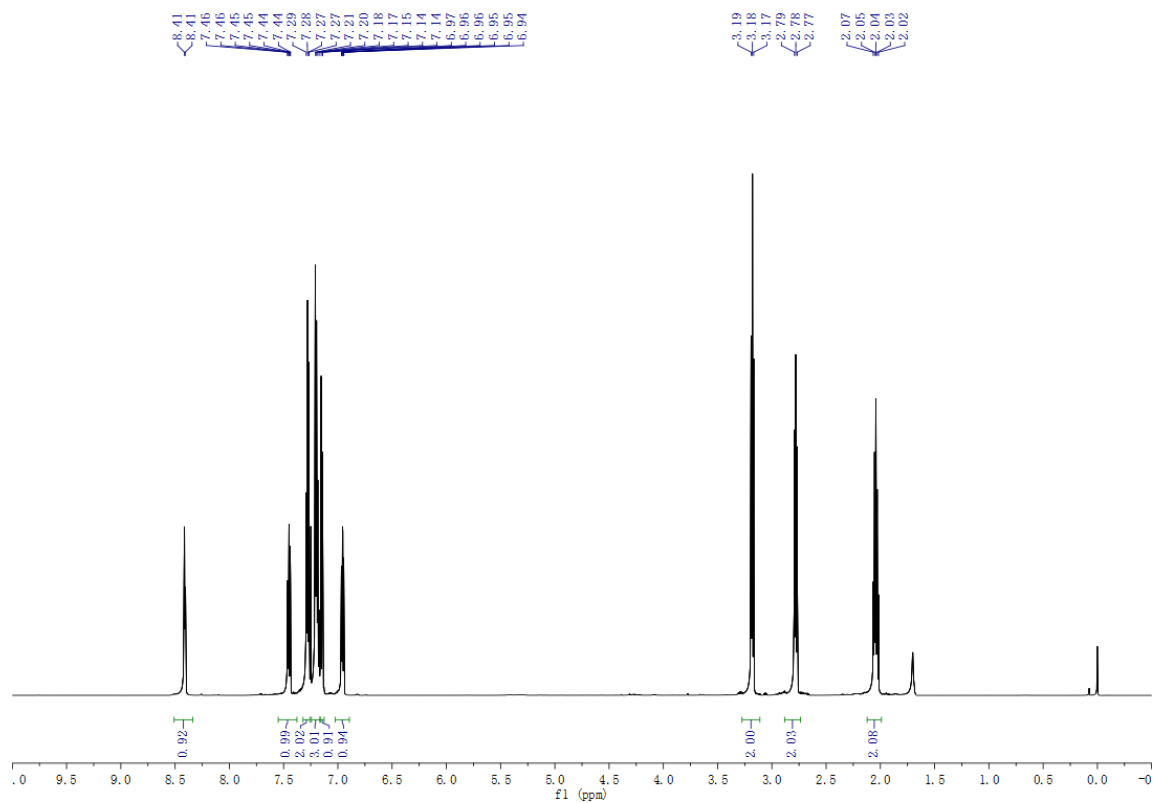

$^{13}\text{C}$  NMR ( $\text{CDCl}_3$ , 150 M Hz)

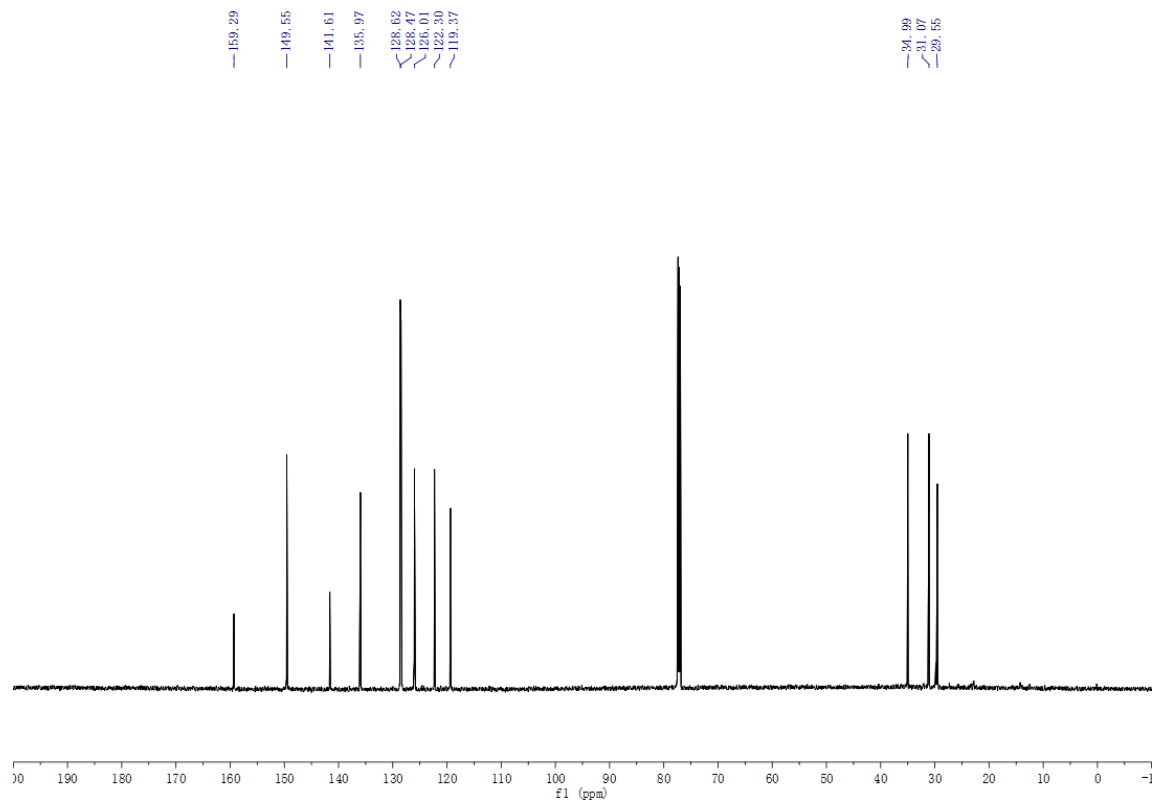

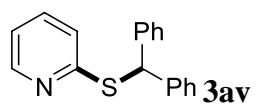

$^1\text{H NMR}$  ( $\text{CDCl}_3$ , 600 M Hz)

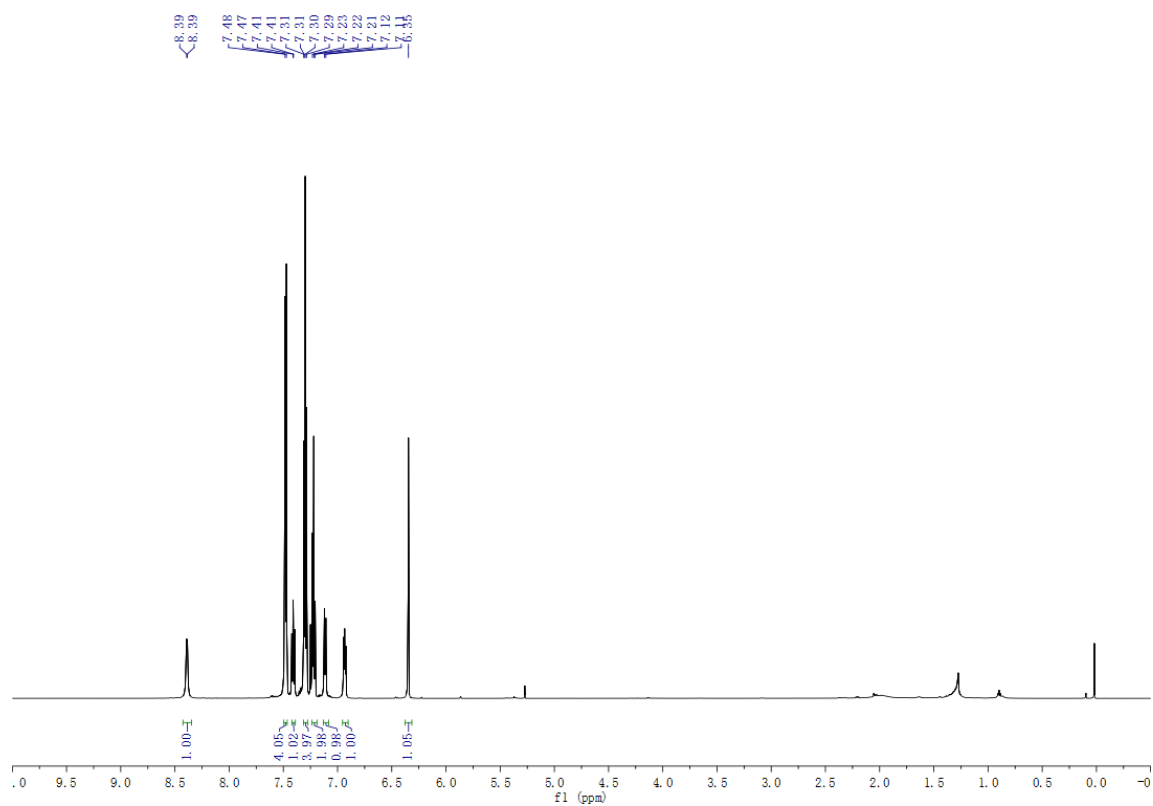

$^{13}\text{C NMR}$  ( $\text{CDCl}_3$ , 150 M Hz)

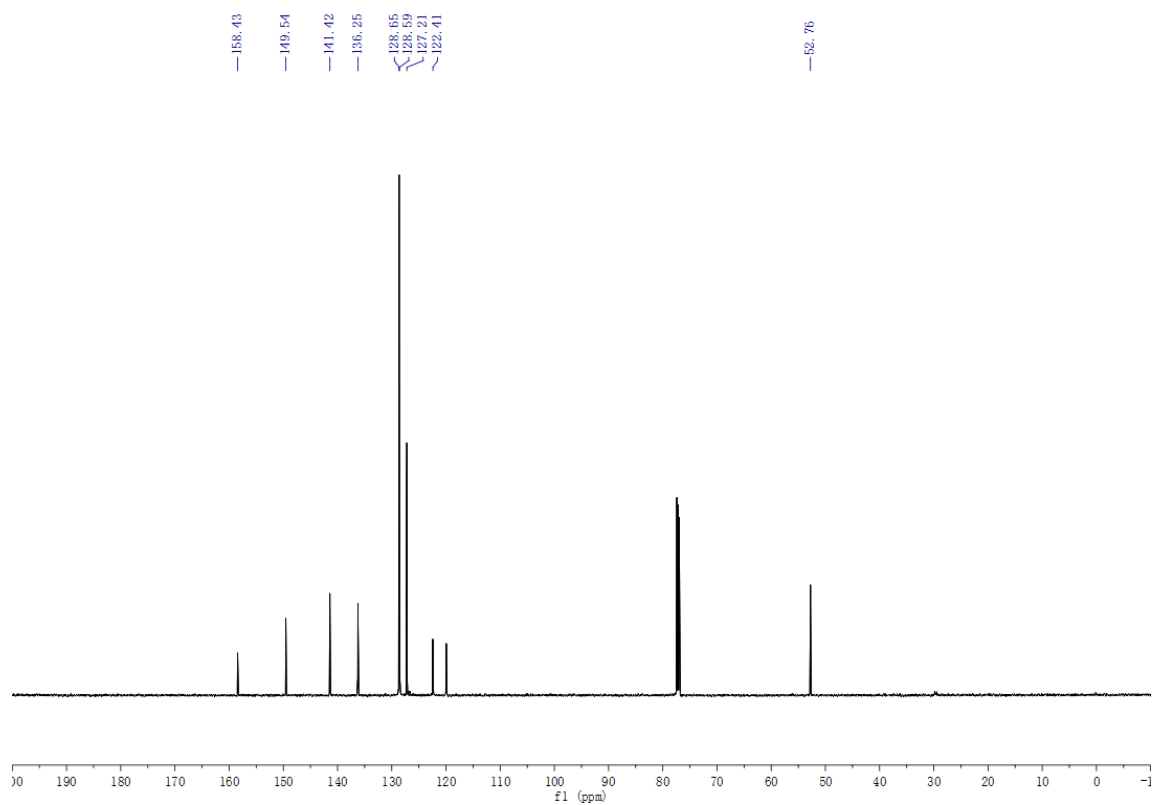

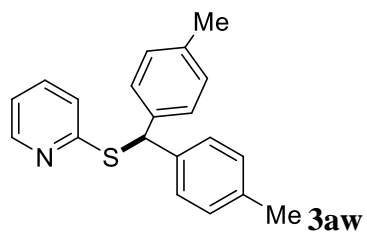

$^1\text{H NMR}$  ( $\text{CDCl}_3$ , 600 MHz)

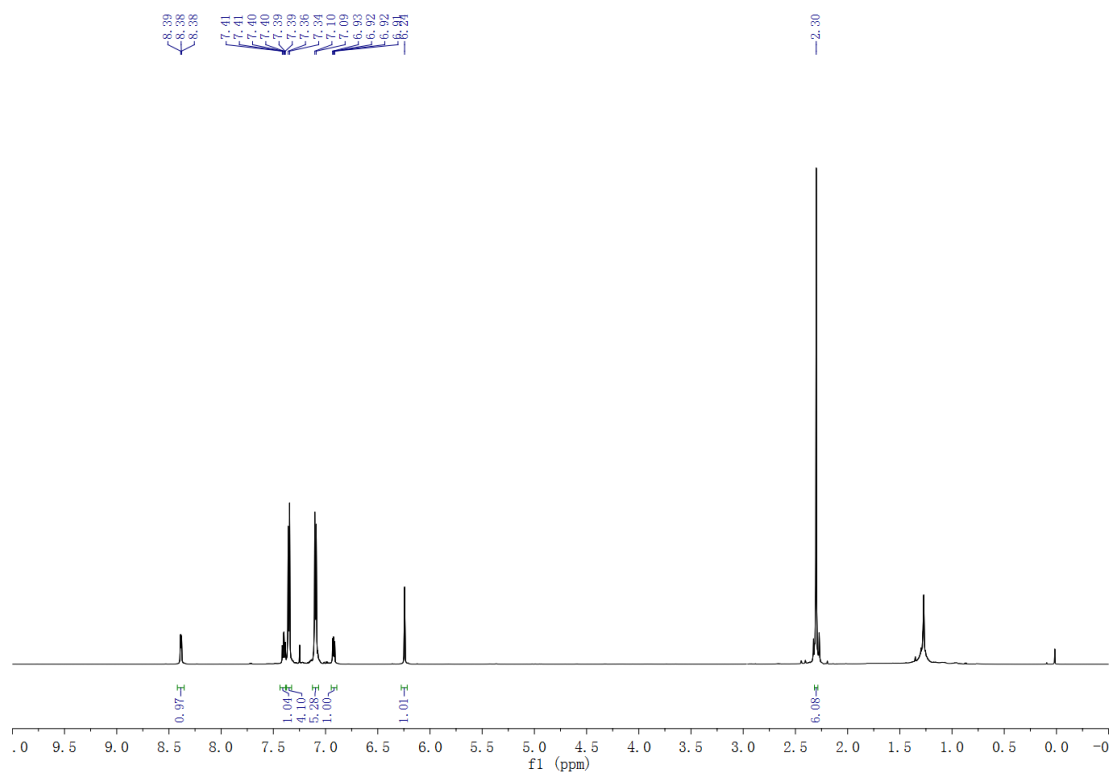

$^{13}\text{C NMR}$  ( $\text{CDCl}_3$ , 150 MHz)

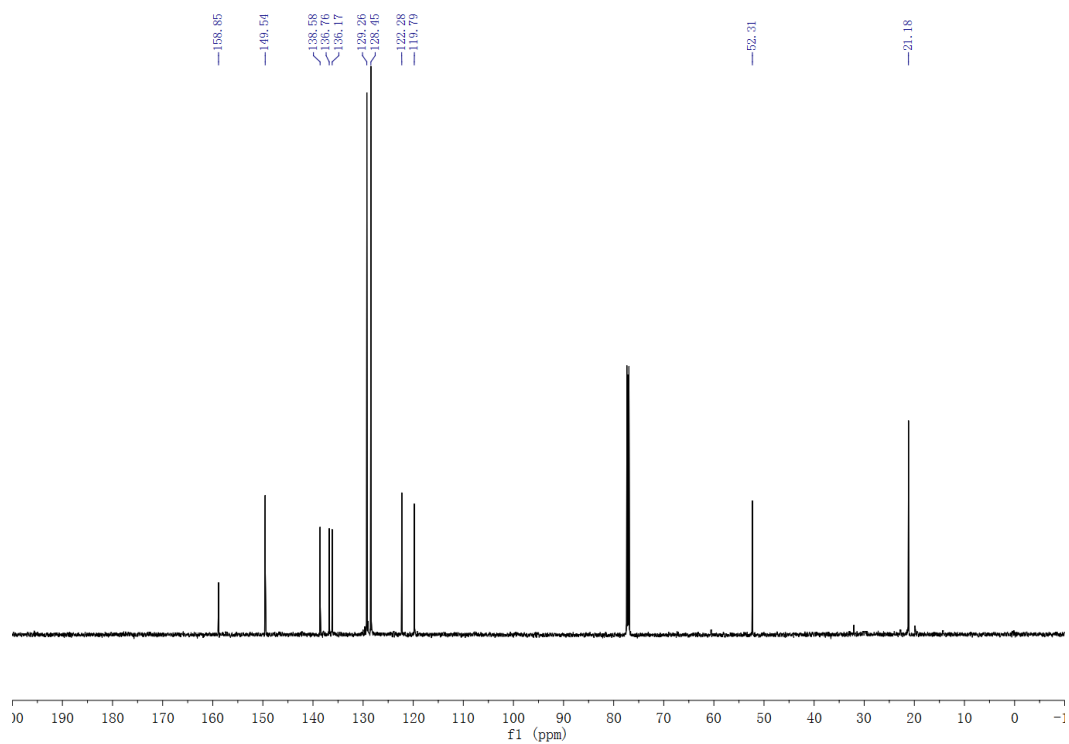

# IR

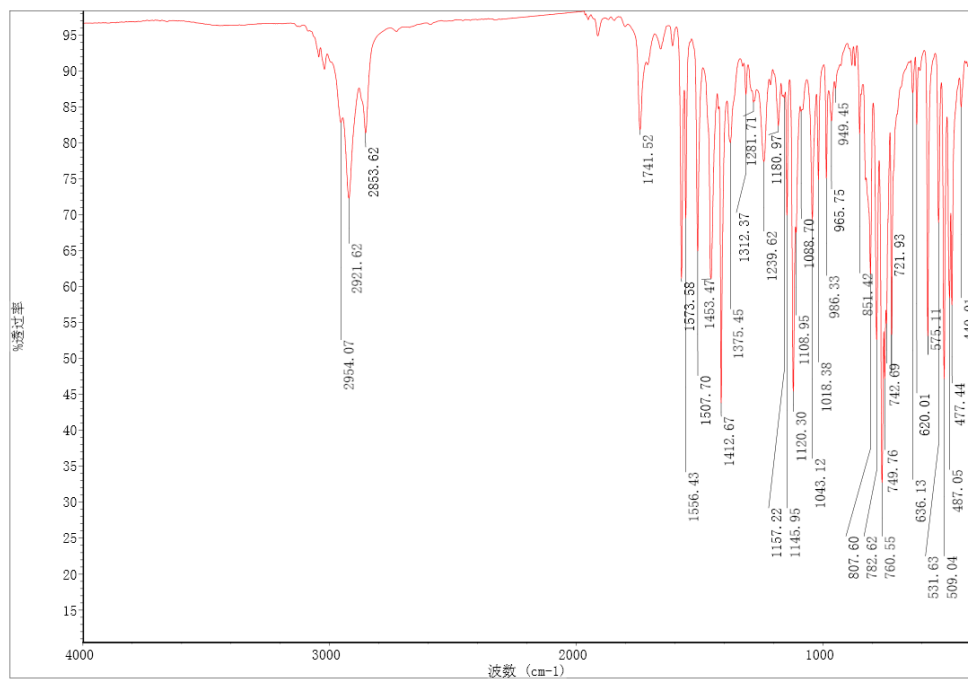

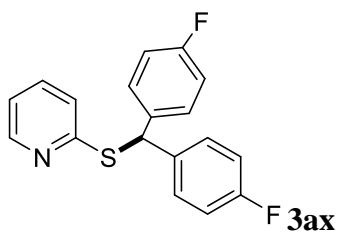

$^1\text{H NMR}$  ( $\text{CDCl}_3$ , 600 M Hz)

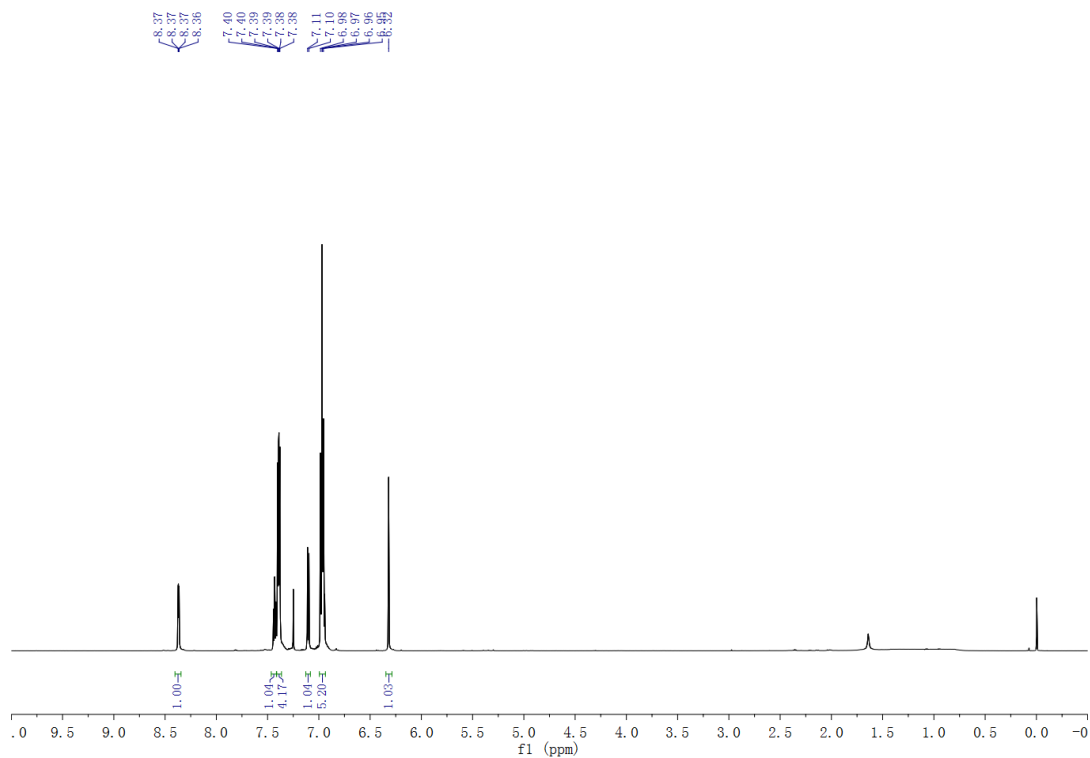

$^{13}\text{C NMR}$  ( $\text{CDCl}_3$ , 150 M Hz)

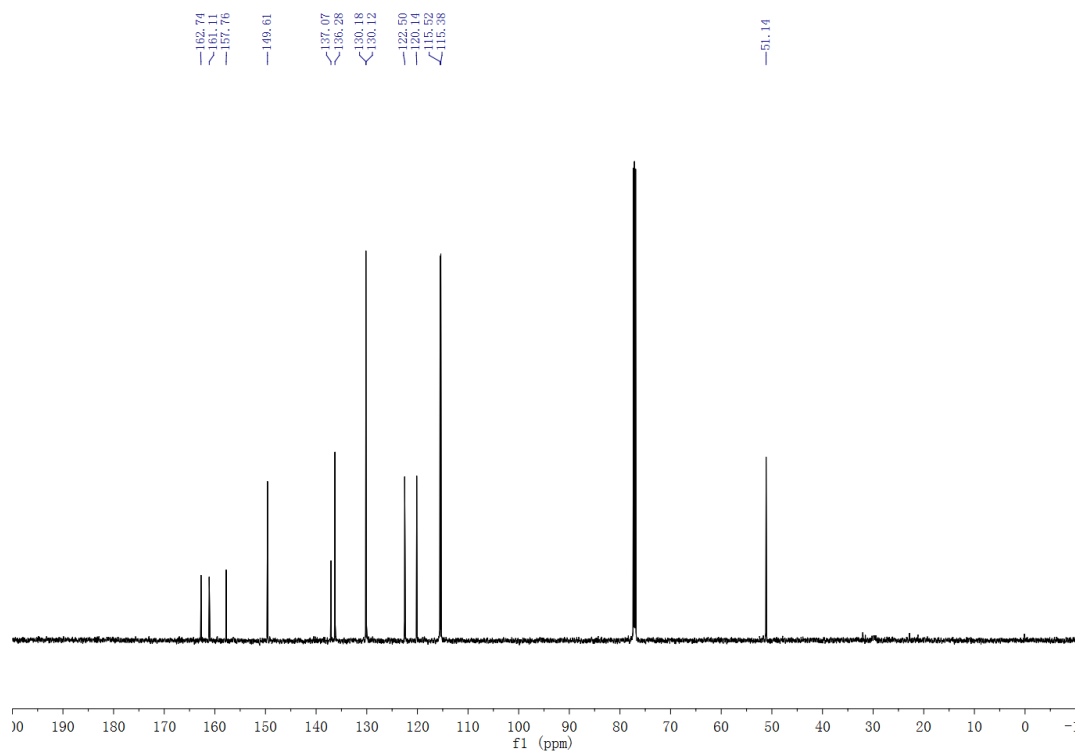

# IR

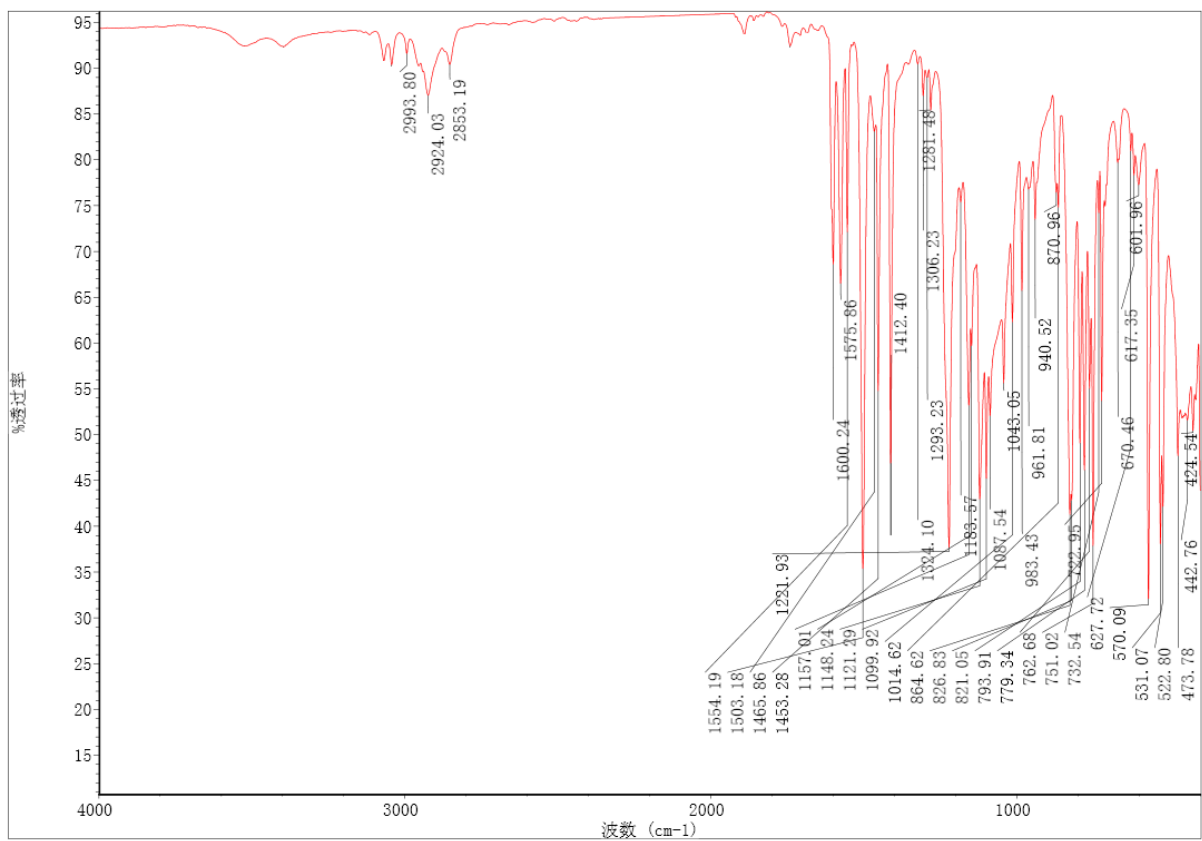

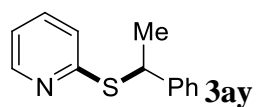

$^1\text{H}$  NMR ( $\text{CDCl}_3$ , 600 M Hz)

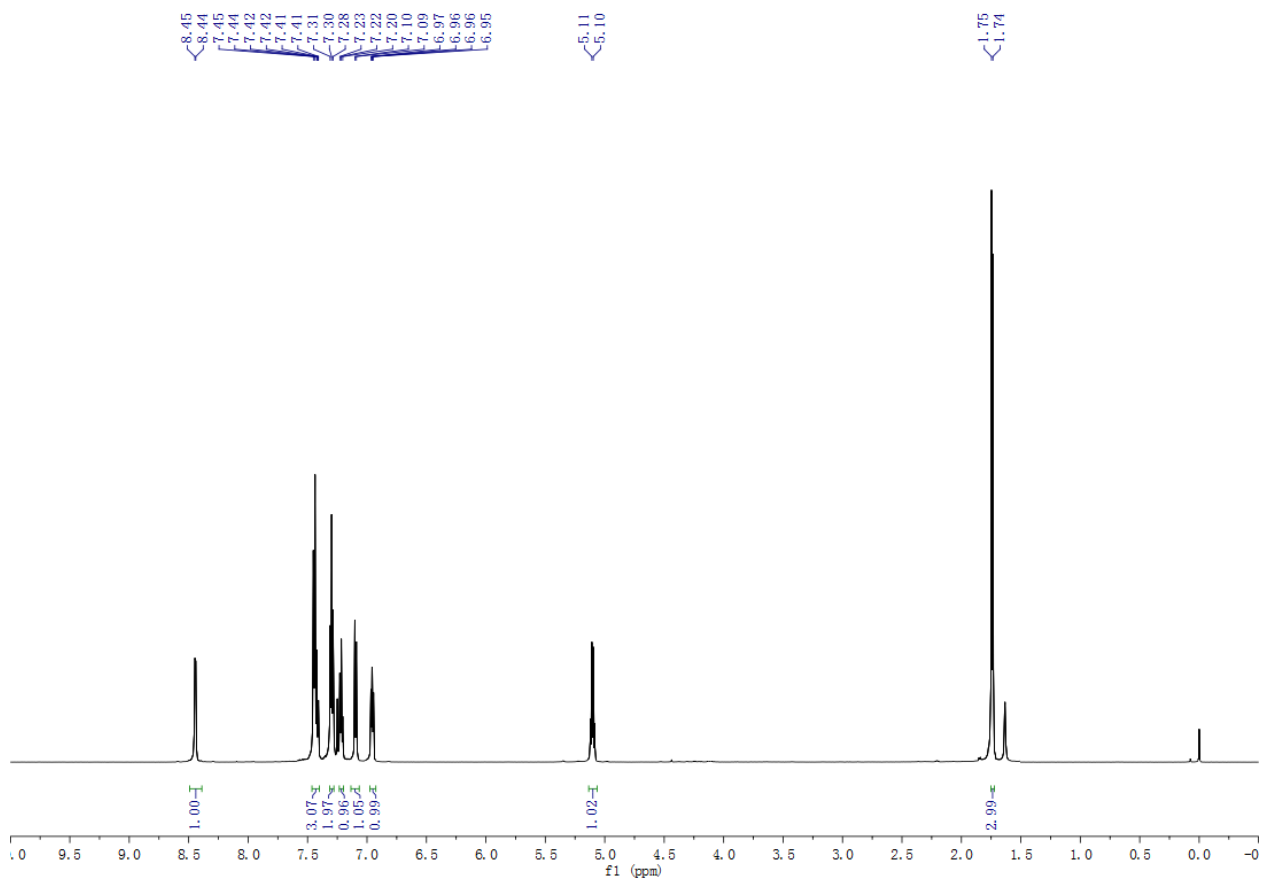

$^{13}\text{C}$  NMR ( $\text{CDCl}_3$ , 150 M Hz)

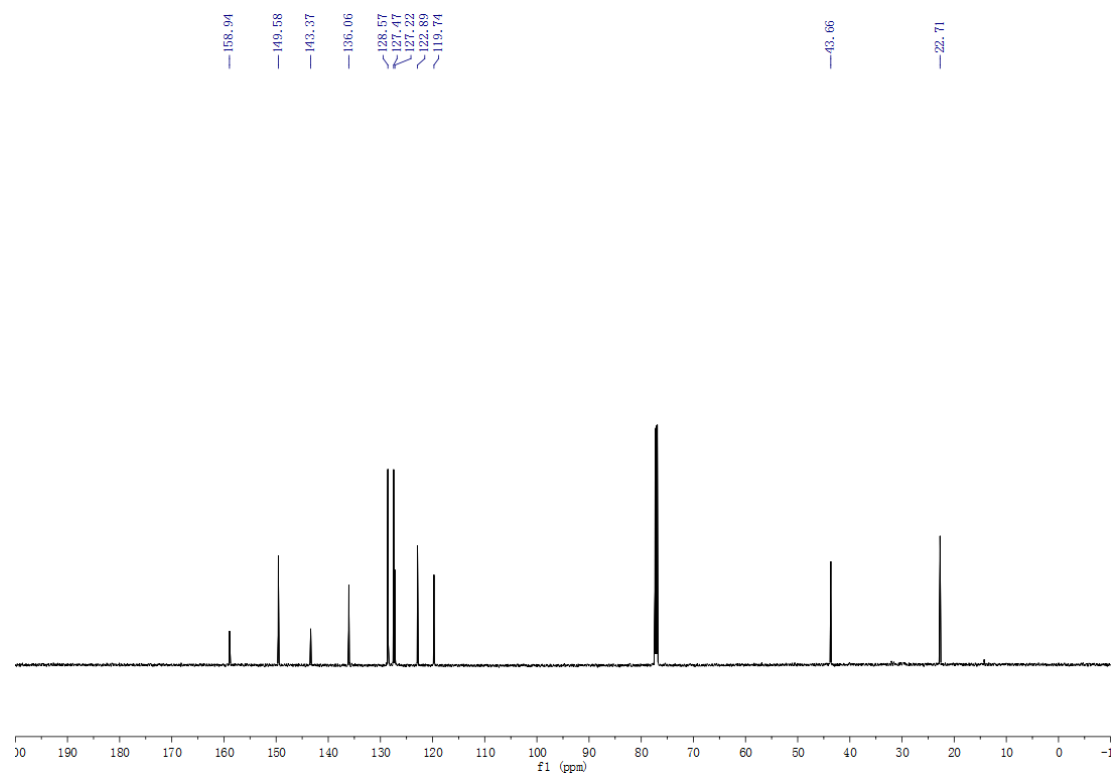



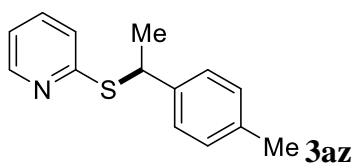

$^1\text{H NMR}$  ( $\text{CDCl}_3$ , 600 MHz)

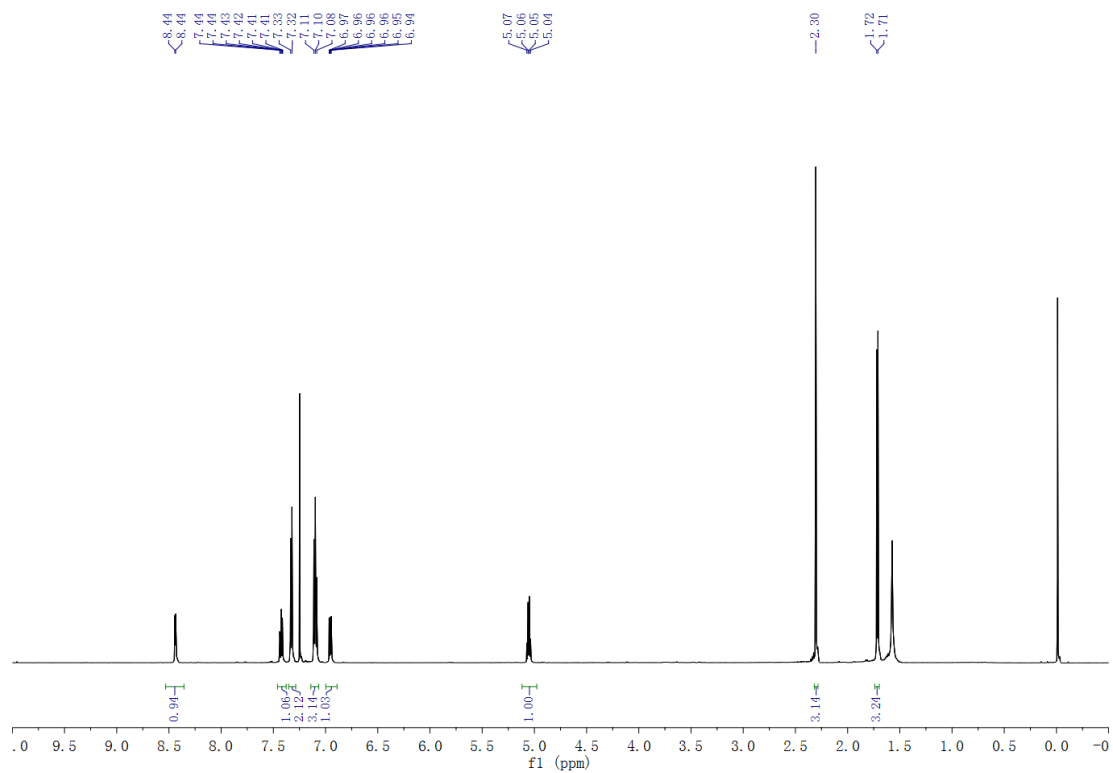

$^{13}\text{C NMR}$  ( $\text{CDCl}_3$ , 150 MHz)

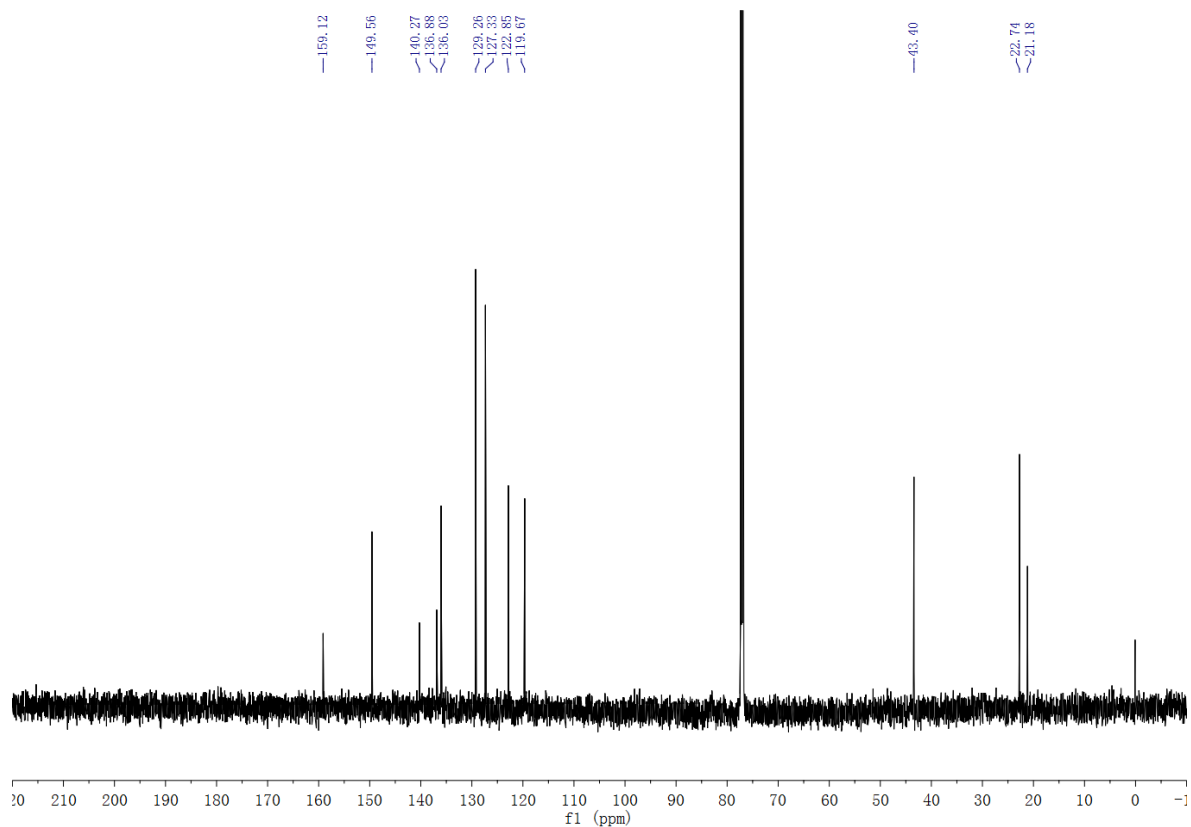

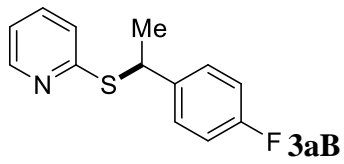

$^1\text{H NMR}$  ( $\text{CDCl}_3$ , 600 M Hz)

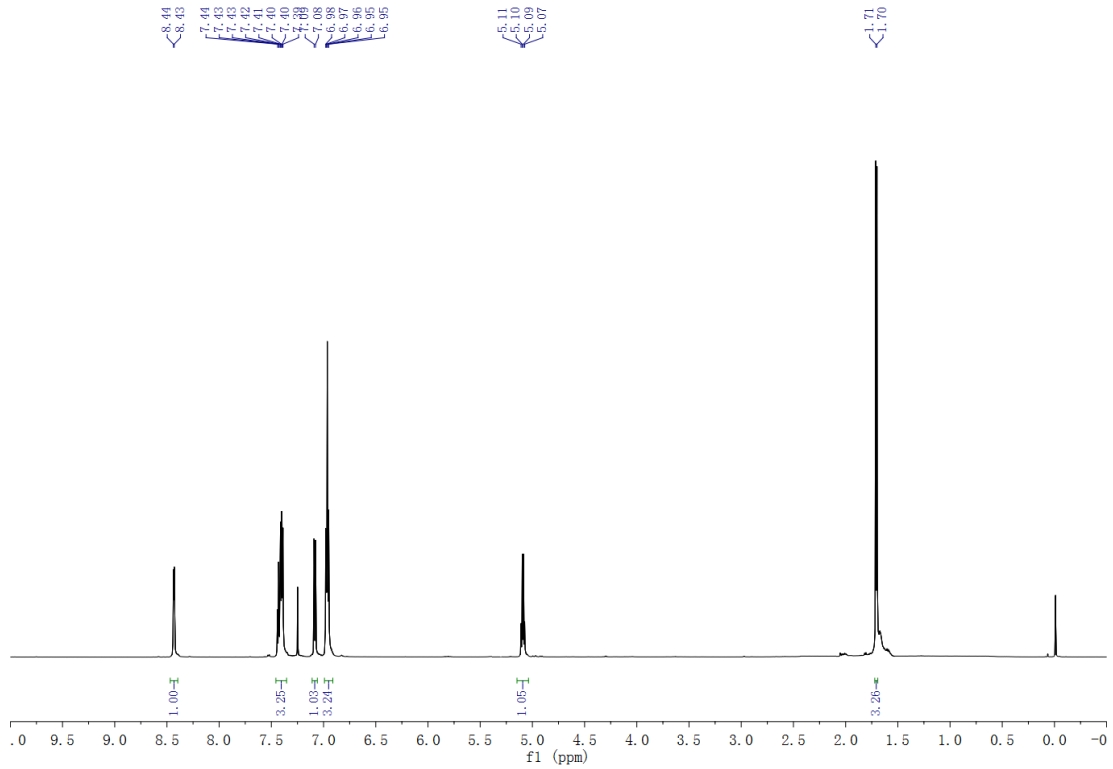

$^{13}\text{C NMR}$  ( $\text{CDCl}_3$ , 150 M Hz)

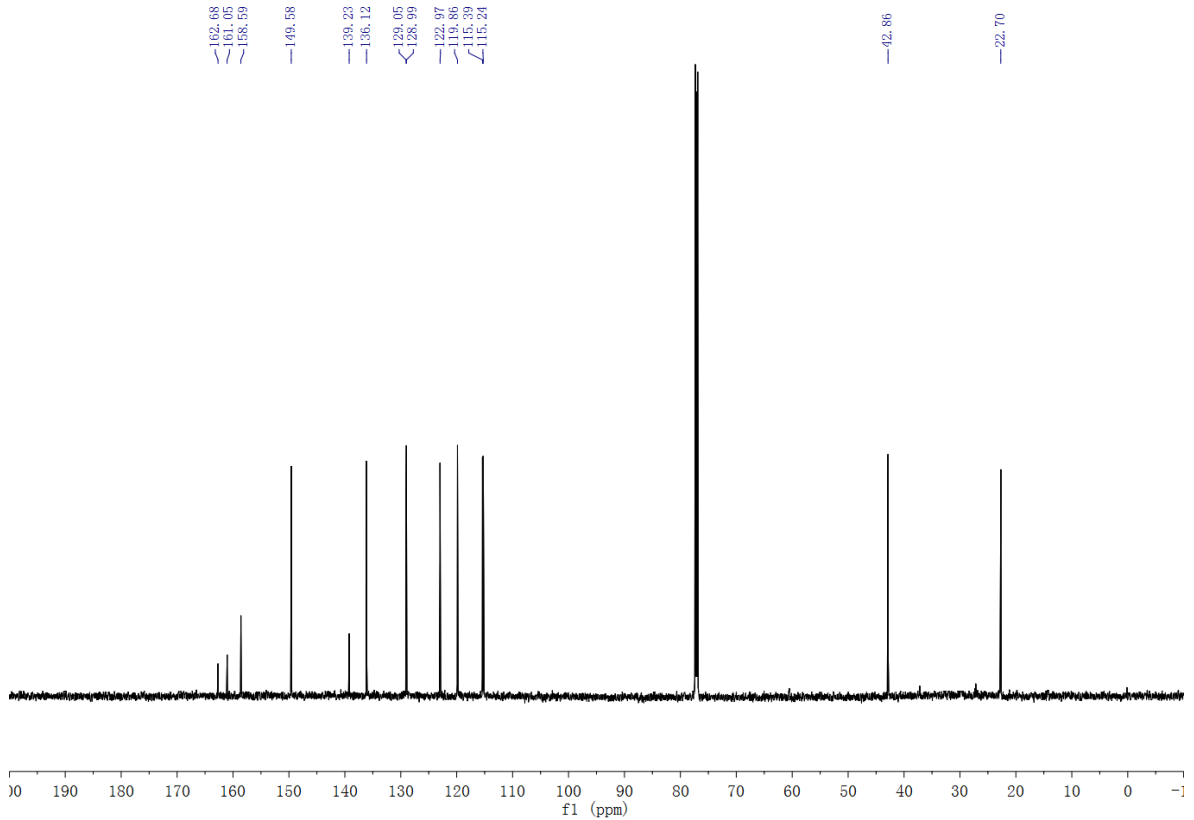

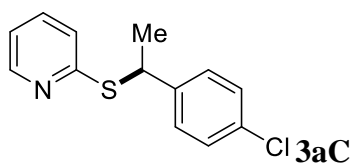

$^1\text{H NMR}$  ( $\text{CDCl}_3$ , 600 M Hz)

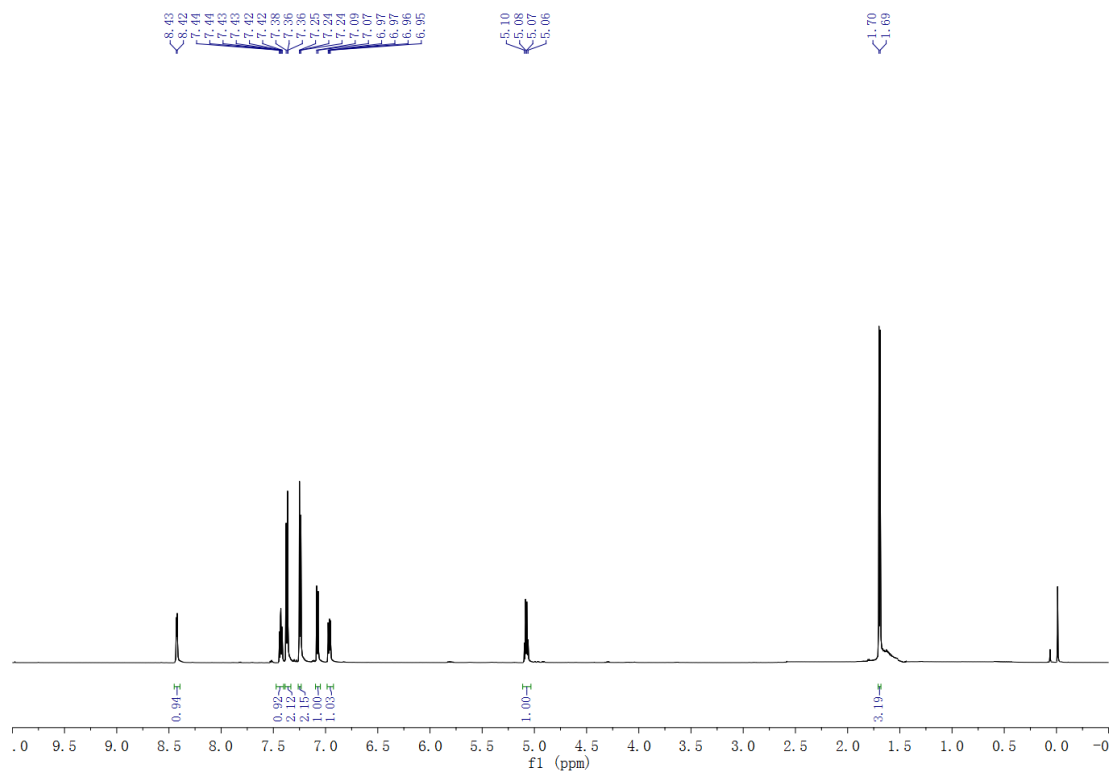

$^{13}\text{C NMR}$  ( $\text{CDCl}_3$ , 150 M Hz)

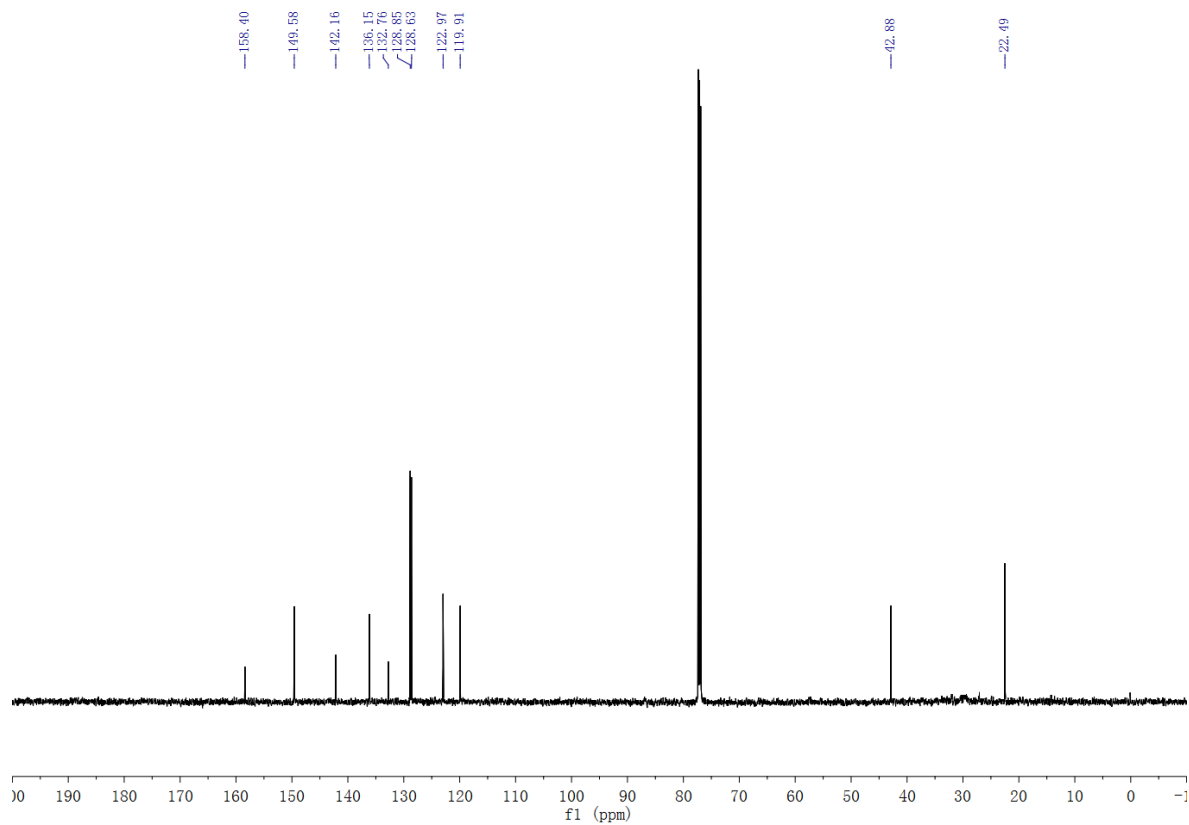

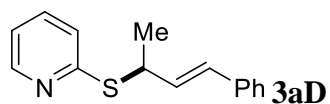

$^1\text{H NMR}$  ( $\text{CDCl}_3$ , 600 M Hz)

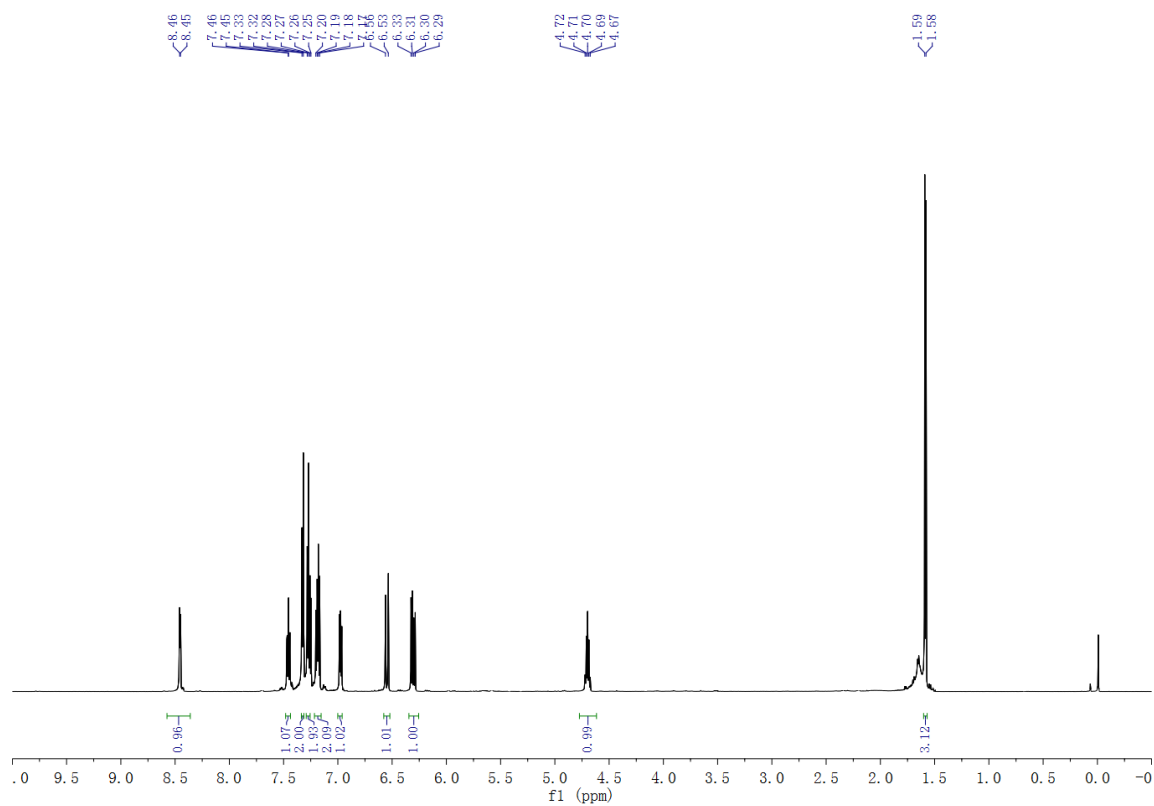

$^{13}\text{C NMR}$  ( $\text{CDCl}_3$ , 150 M Hz)

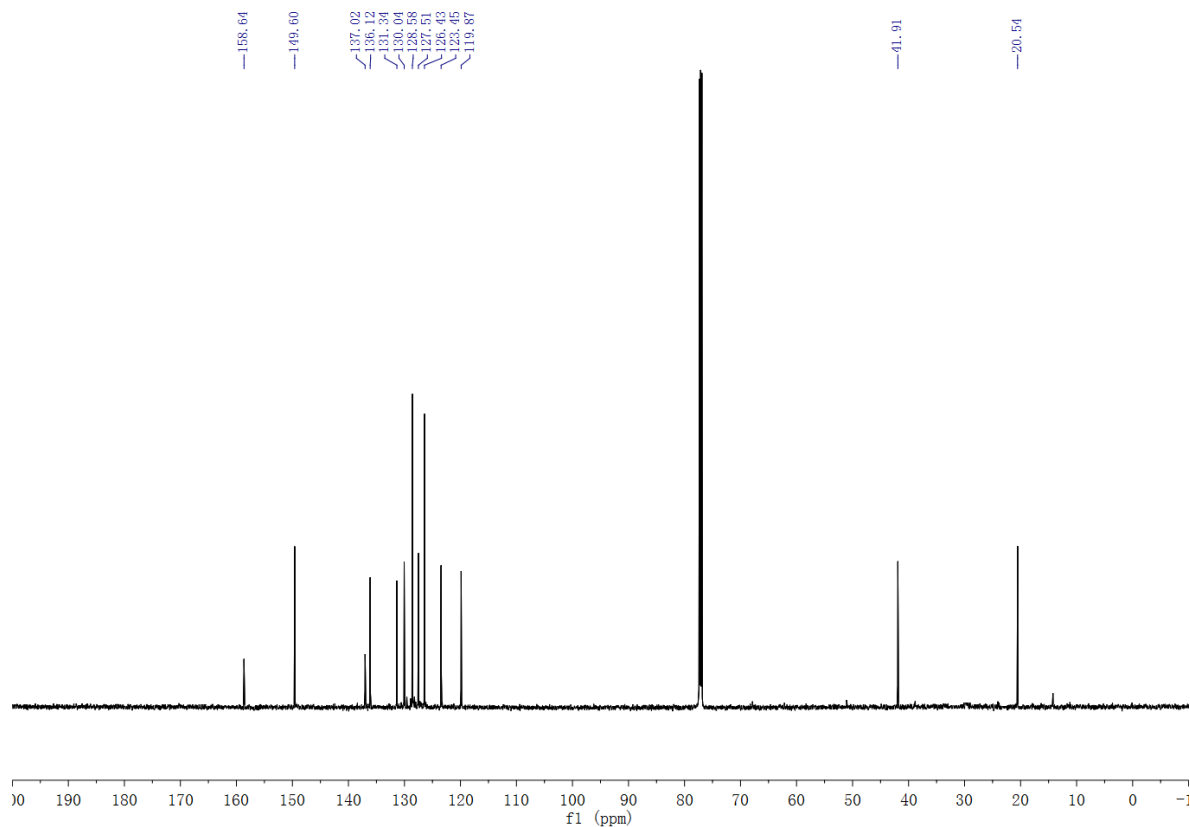

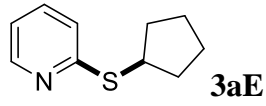

$^1\text{H}$  NMR ( $\text{CDCl}_3$ , 600 M Hz)

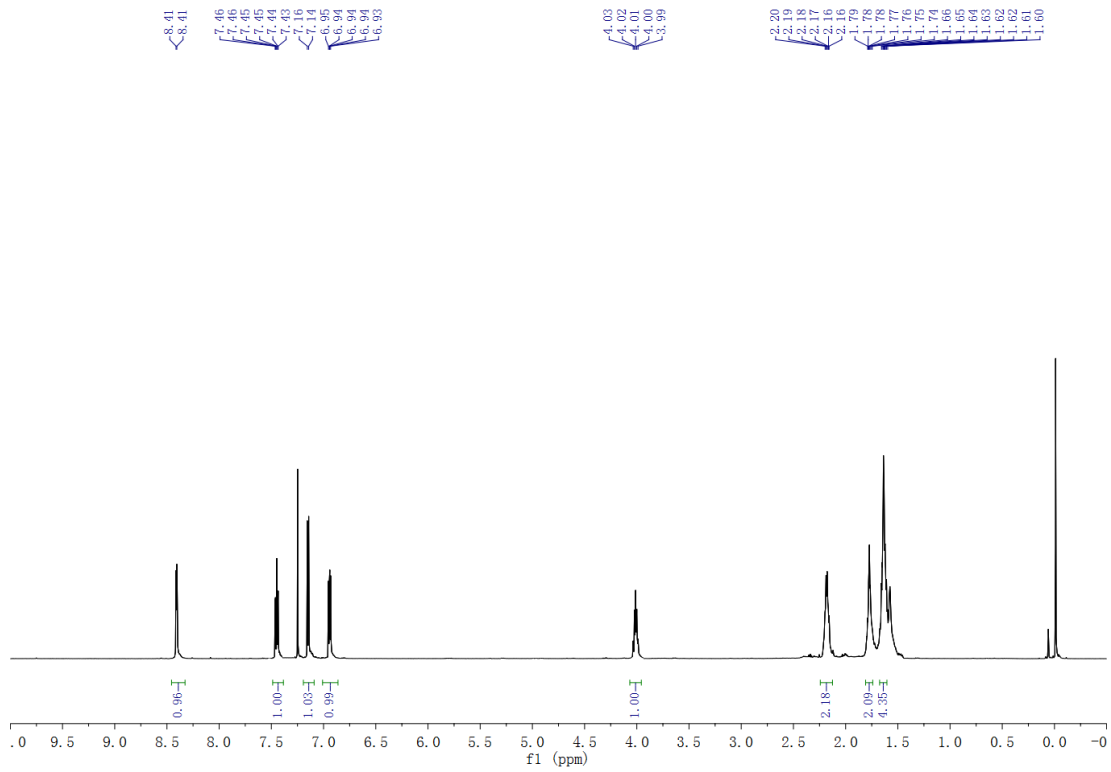

$^{13}\text{C}$  NMR ( $\text{CDCl}_3$ , 150 M Hz)

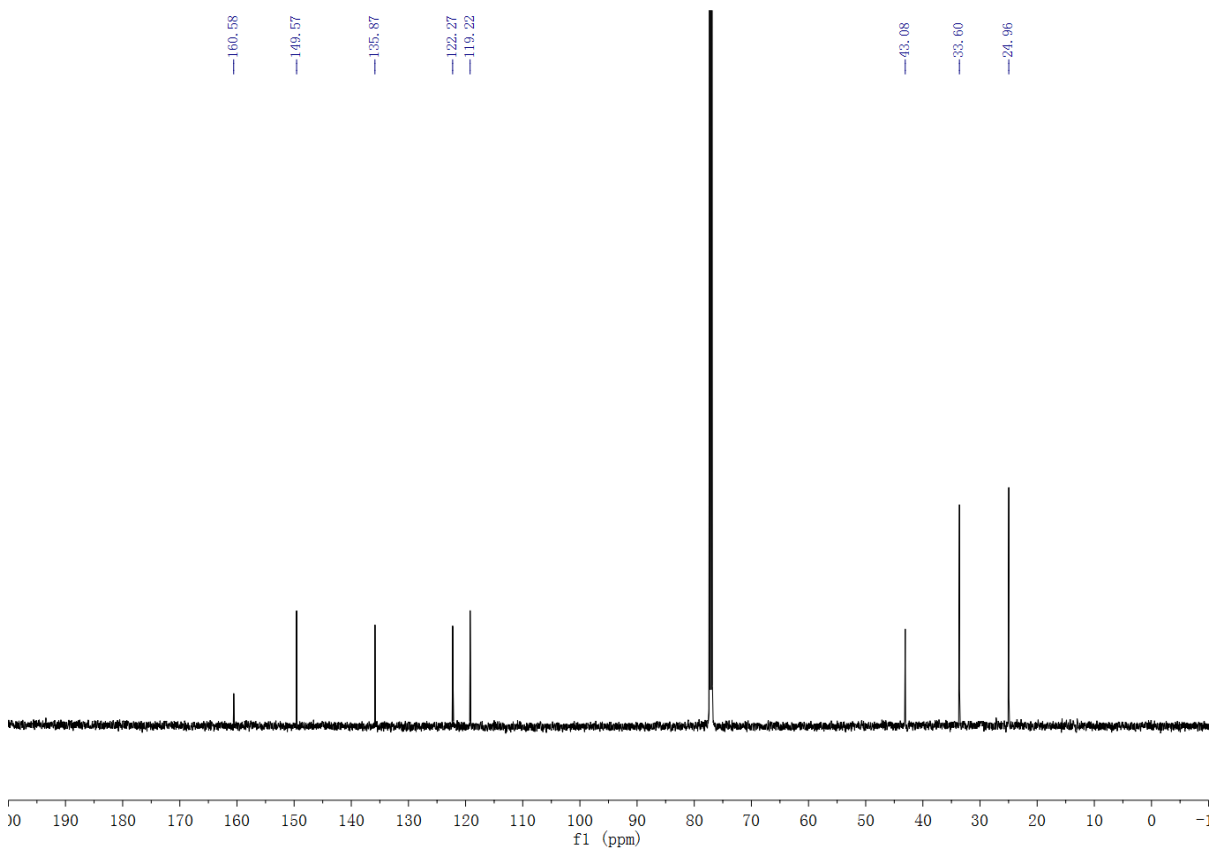

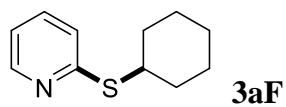

$^1\text{H}$  NMR ( $\text{CDCl}_3$ , 600 M Hz)

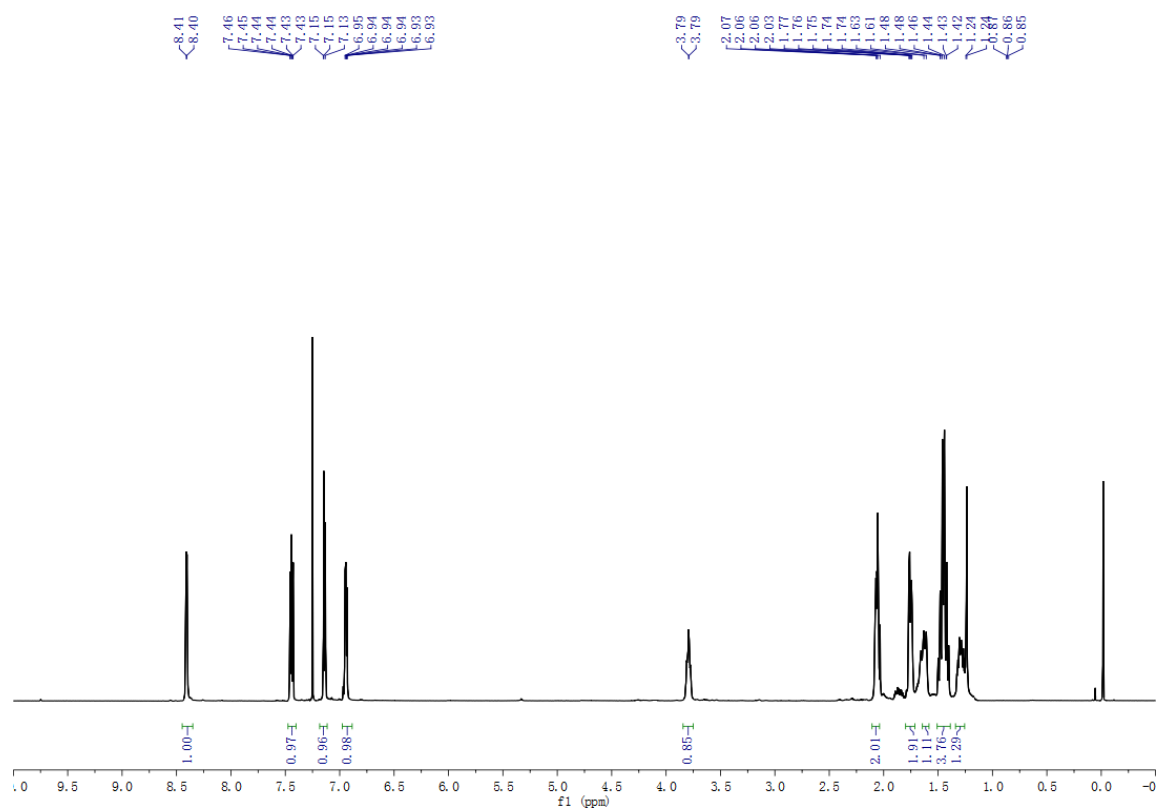

$^{13}\text{C}$  NMR ( $\text{CDCl}_3$ , 150 M Hz)

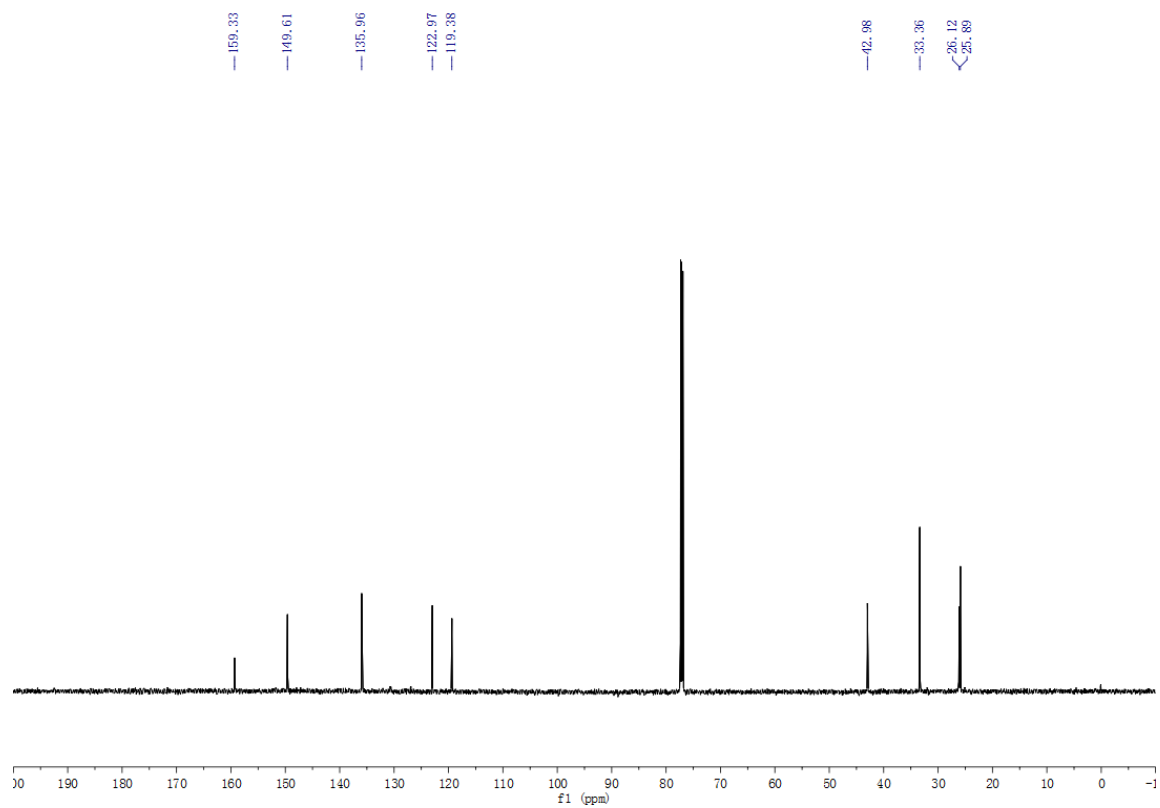

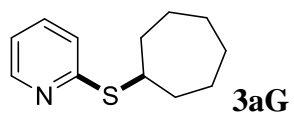

$^1\text{H}$  NMR ( $\text{CDCl}_3$ , 600 M Hz)

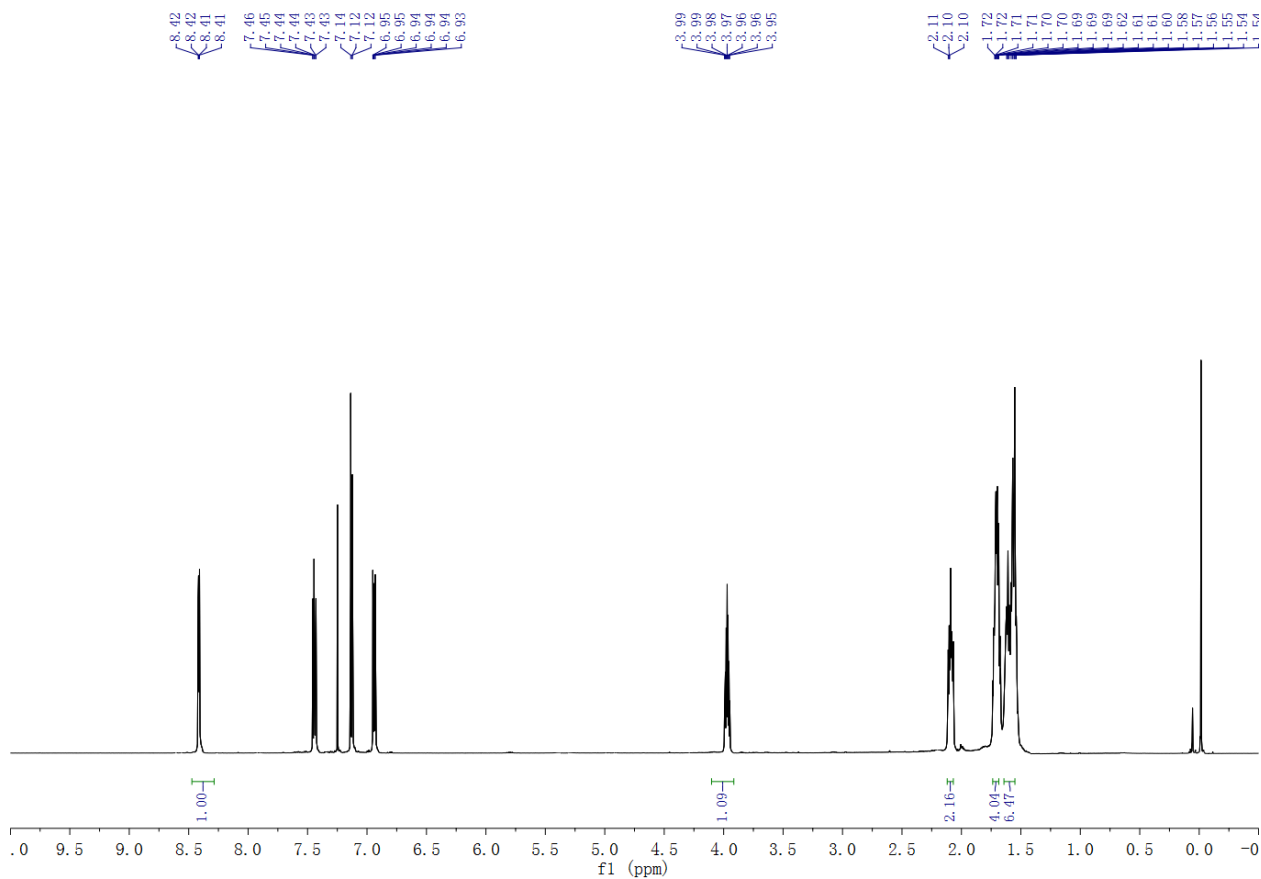

$^{13}\text{C}$  NMR ( $\text{CDCl}_3$ , 150 M Hz)

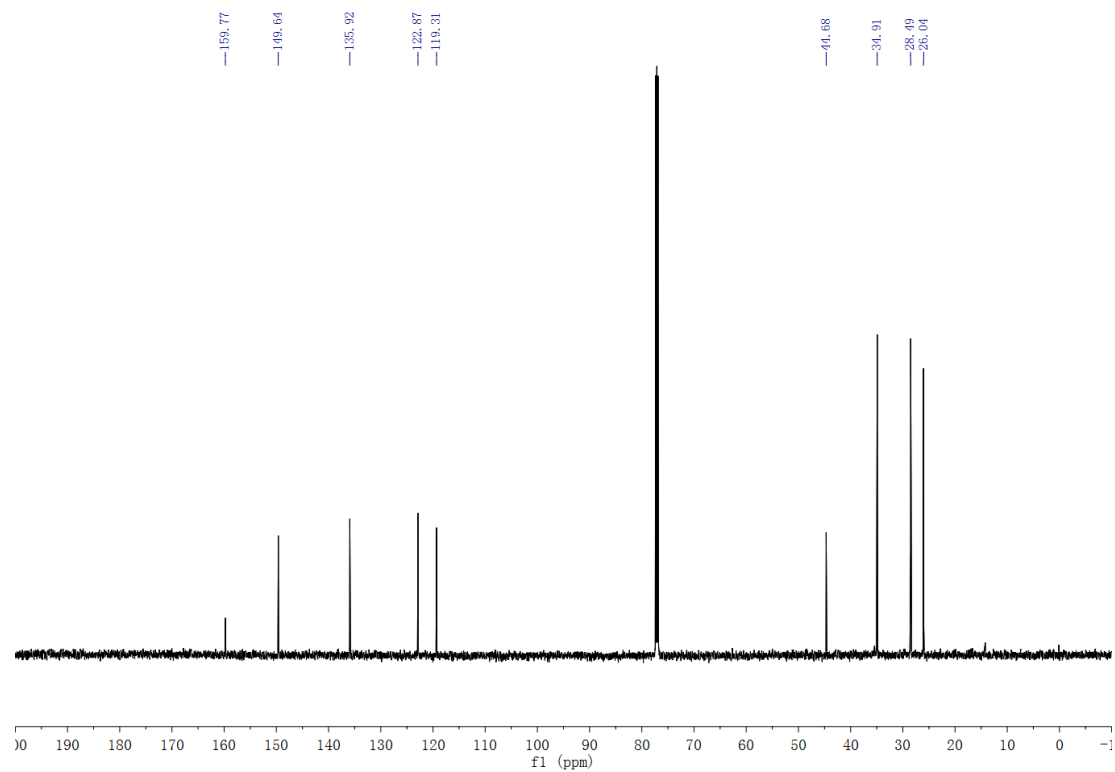

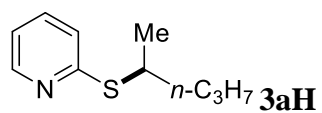

<sup>1</sup>H NMR (CDCl<sub>3</sub>, 600 M Hz)

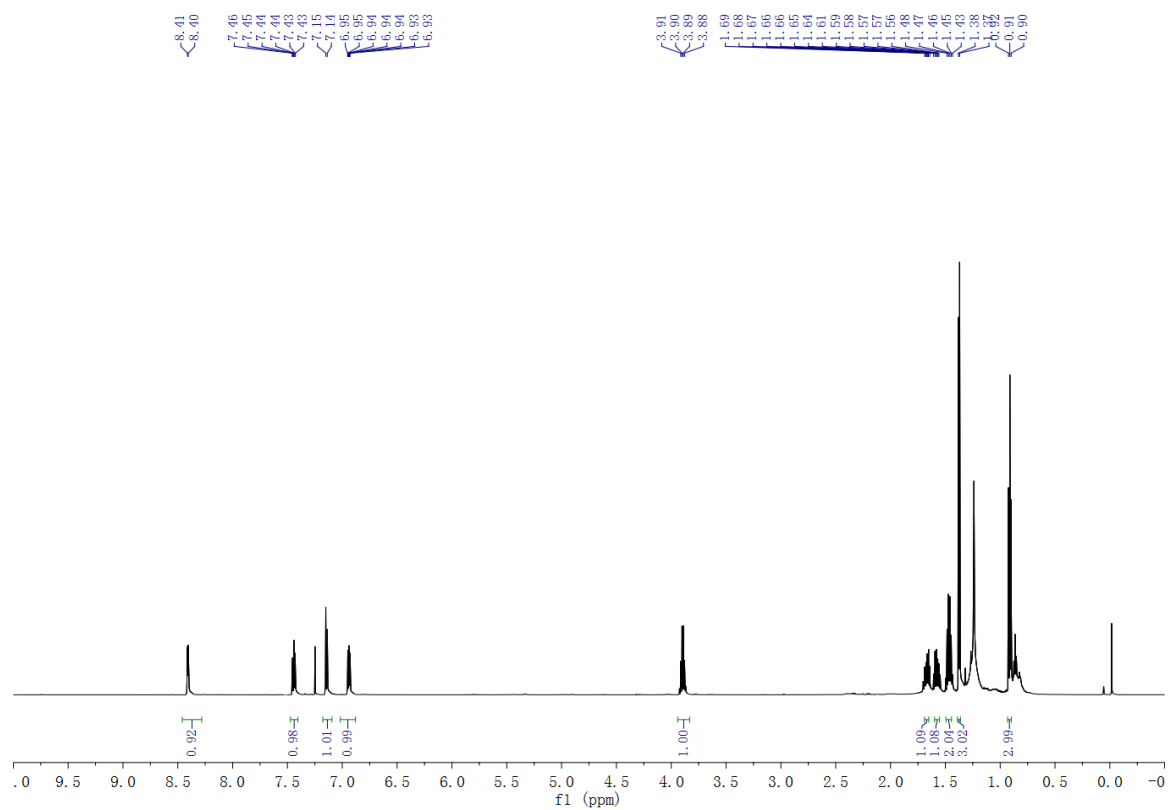

<sup>13</sup>C NMR (CDCl<sub>3</sub>, 150 M Hz)

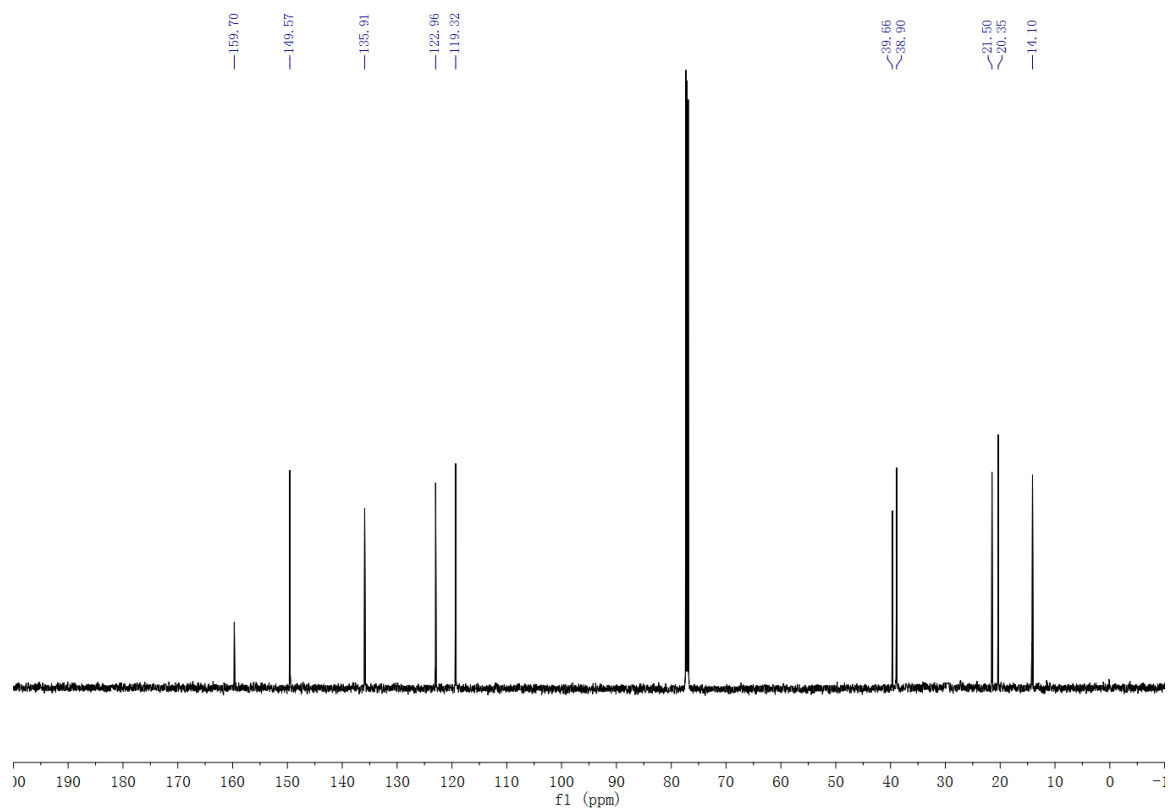



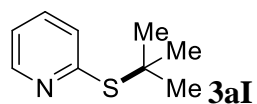

$^1\text{H NMR}$  ( $\text{CDCl}_3$ , 600 M Hz)

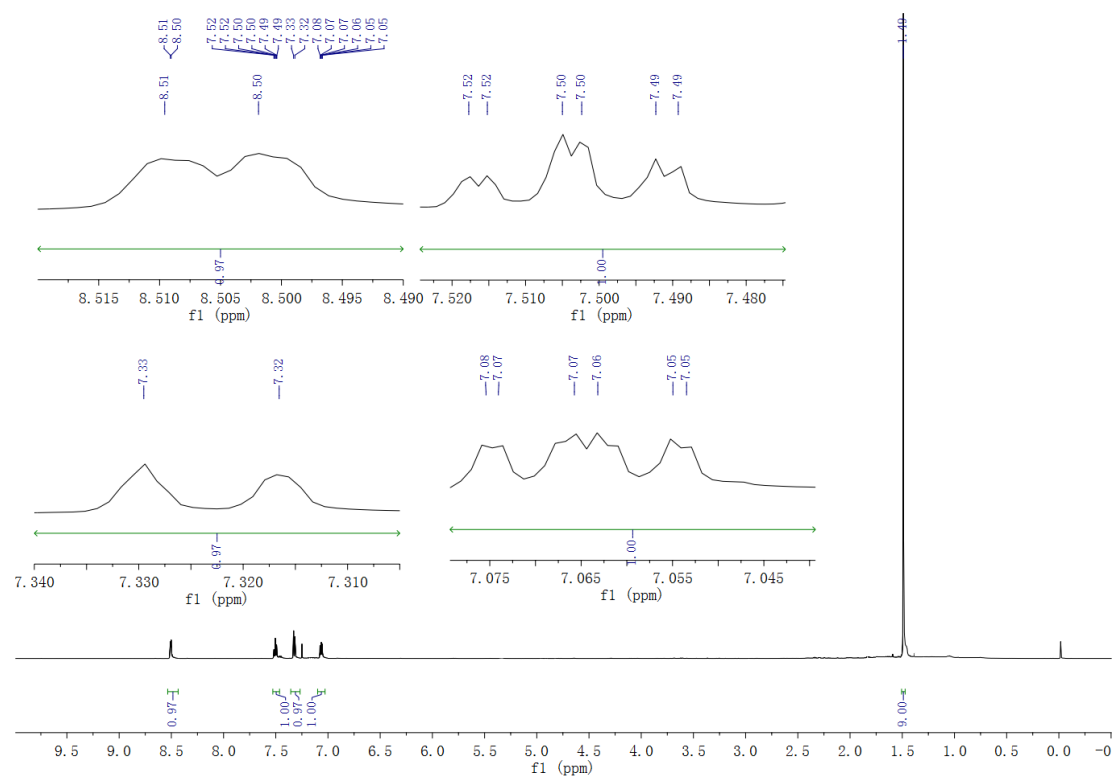

$^{13}\text{C NMR}$  ( $\text{CDCl}_3$ , 150 M Hz)

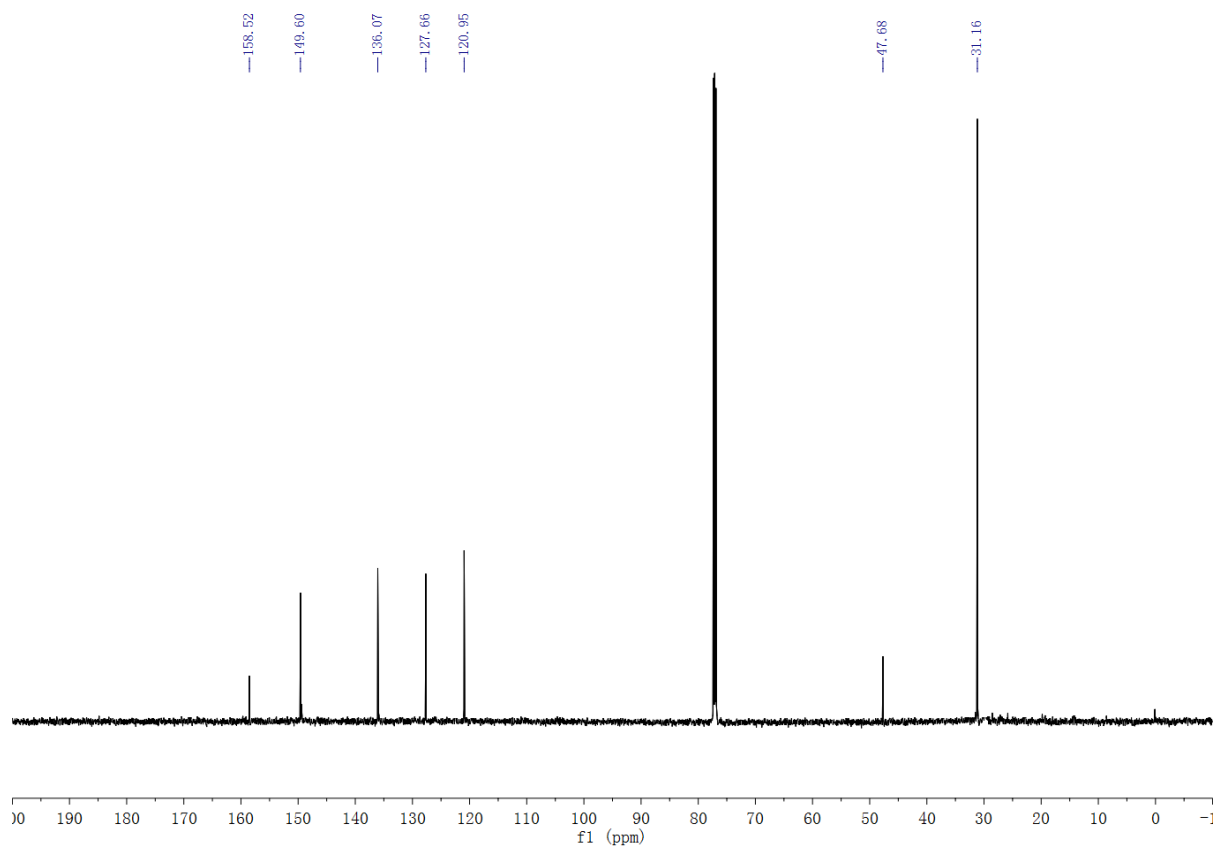

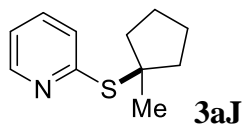

<sup>1</sup>H NMR (CDCl<sub>3</sub>, 600 MHz)

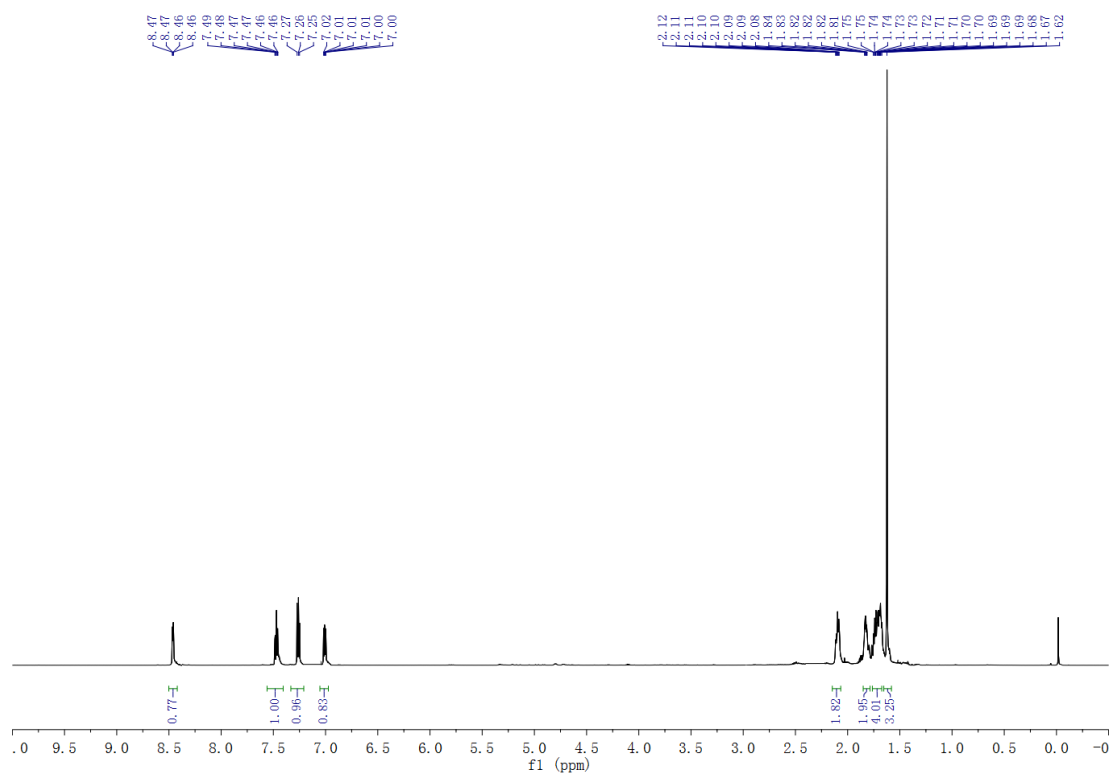

<sup>13</sup>C NMR (CDCl<sub>3</sub>, 150 MHz)

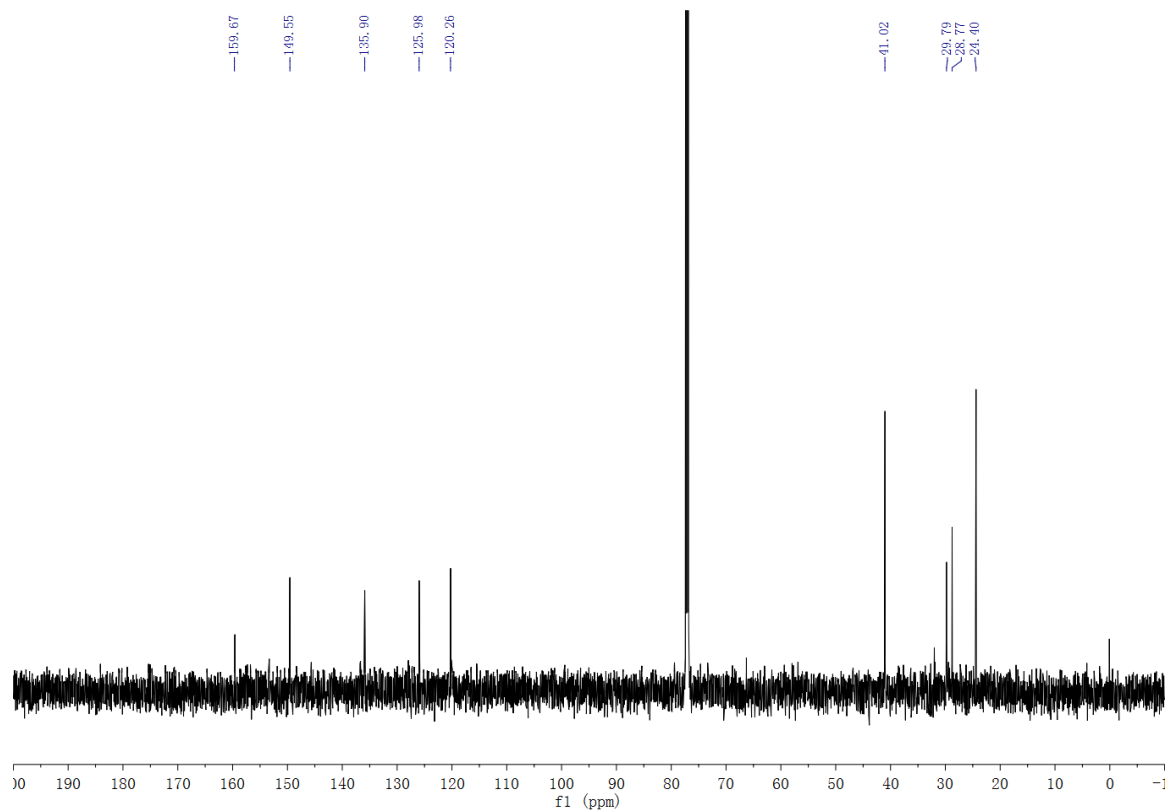

# IR

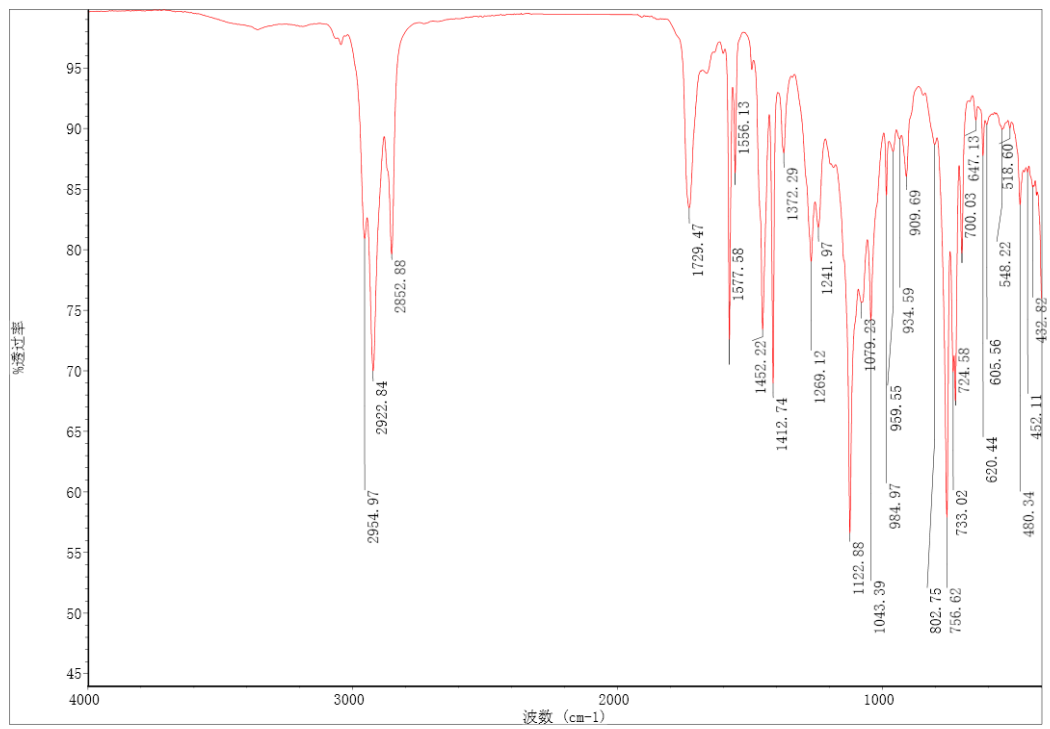

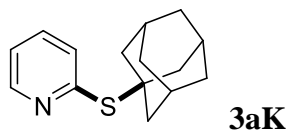

$^1\text{H}$  NMR ( $\text{CDCl}_3$ , 600 M Hz)

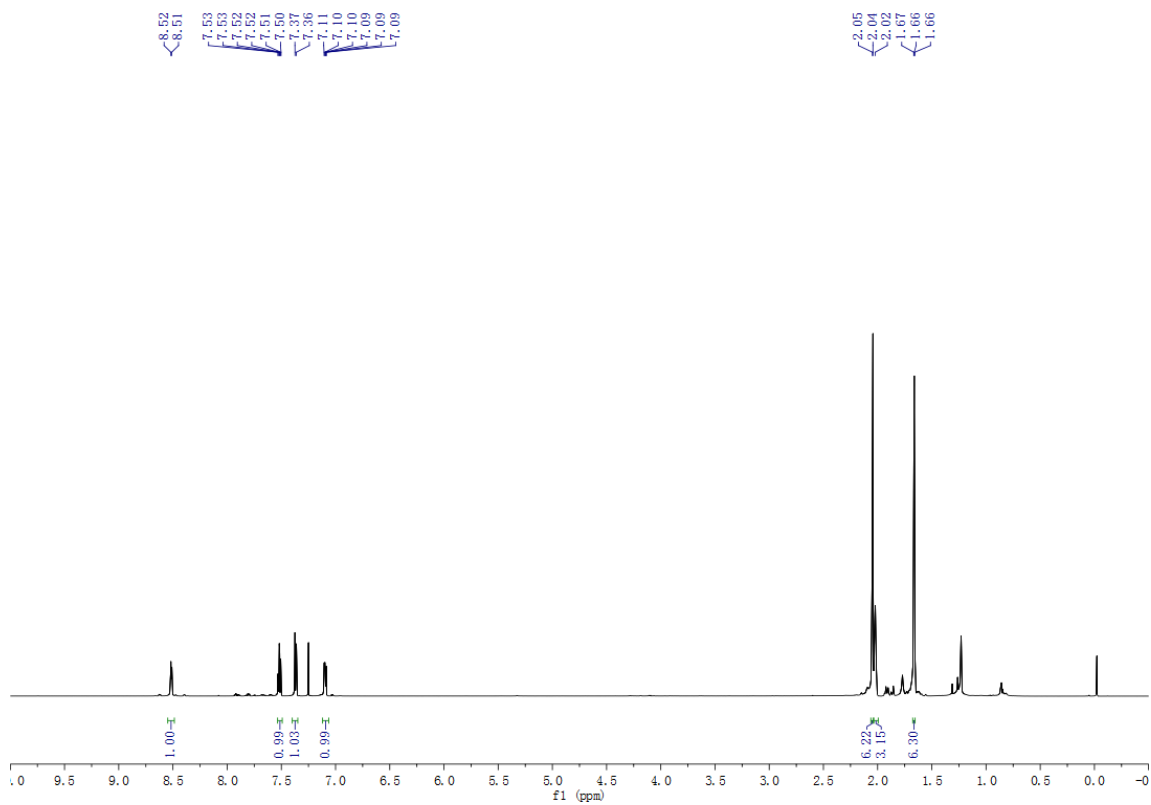

$^{13}\text{C}$  NMR ( $\text{CDCl}_3$ , 150 M Hz)

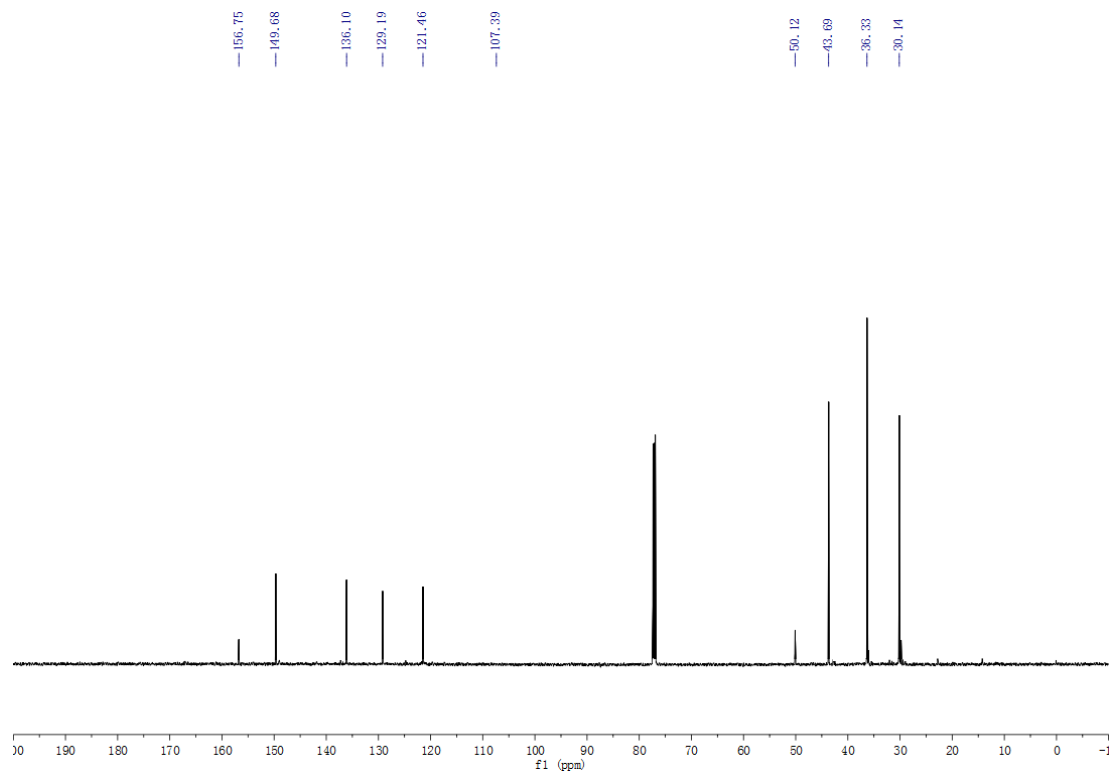

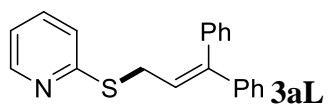

$^1\text{H NMR}$  ( $\text{CDCl}_3$ , 600 M Hz)

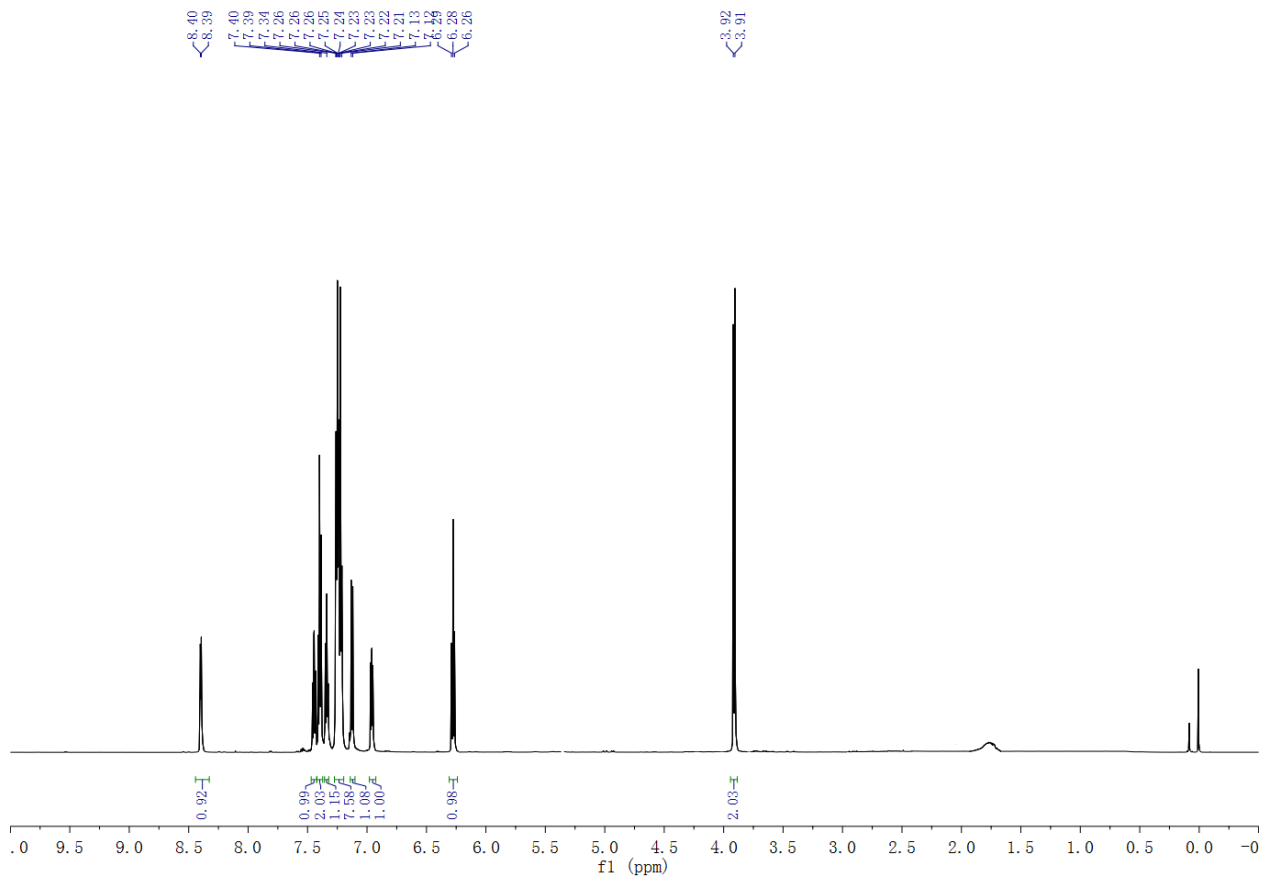

$^{13}\text{C NMR}$  ( $\text{CDCl}_3$ , 150 M Hz)

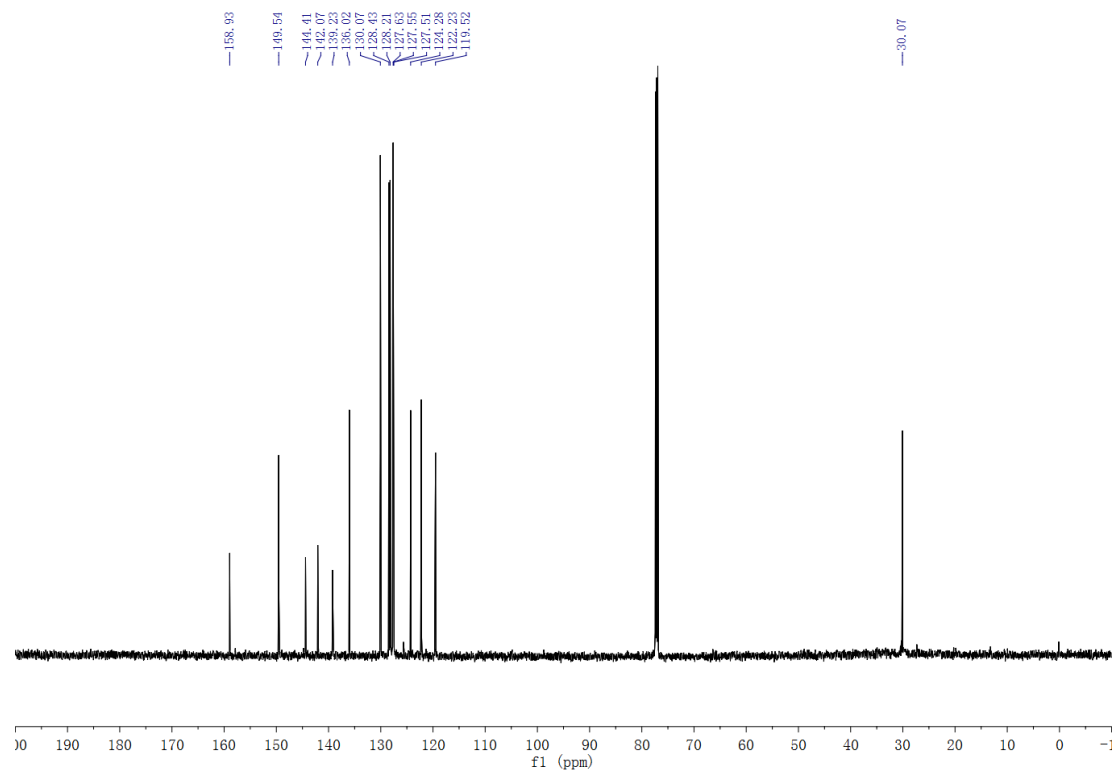

# IR

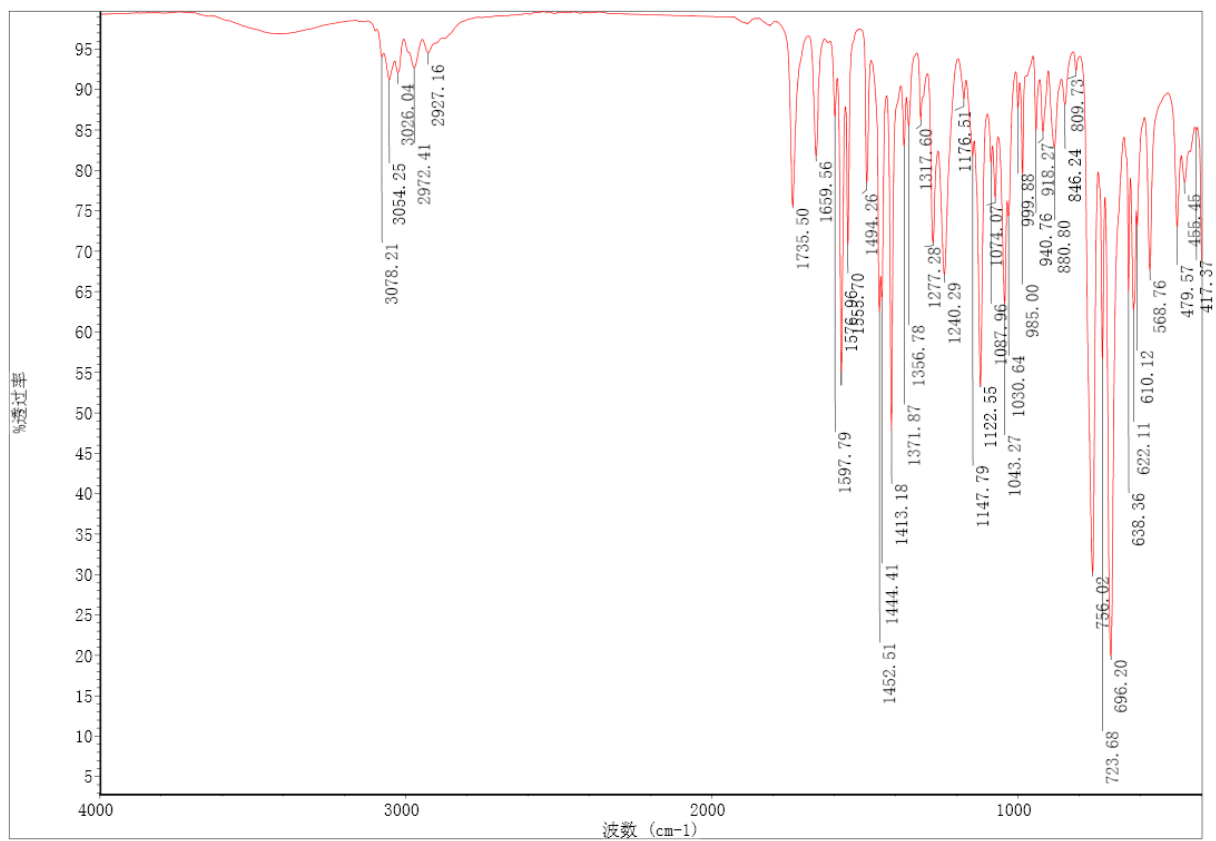

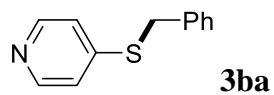

$^1\text{H}$  NMR ( $\text{CDCl}_3$ , 600 M Hz)

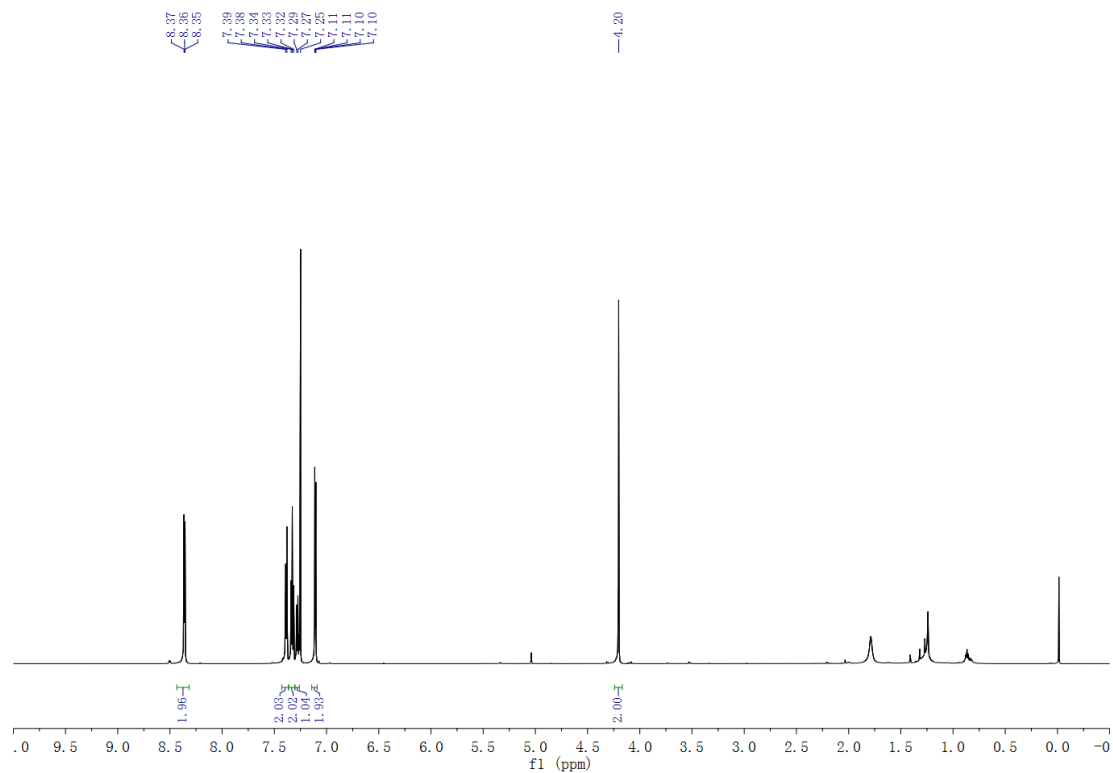

$^{13}\text{C}$  NMR ( $\text{CDCl}_3$ , 150 M Hz)

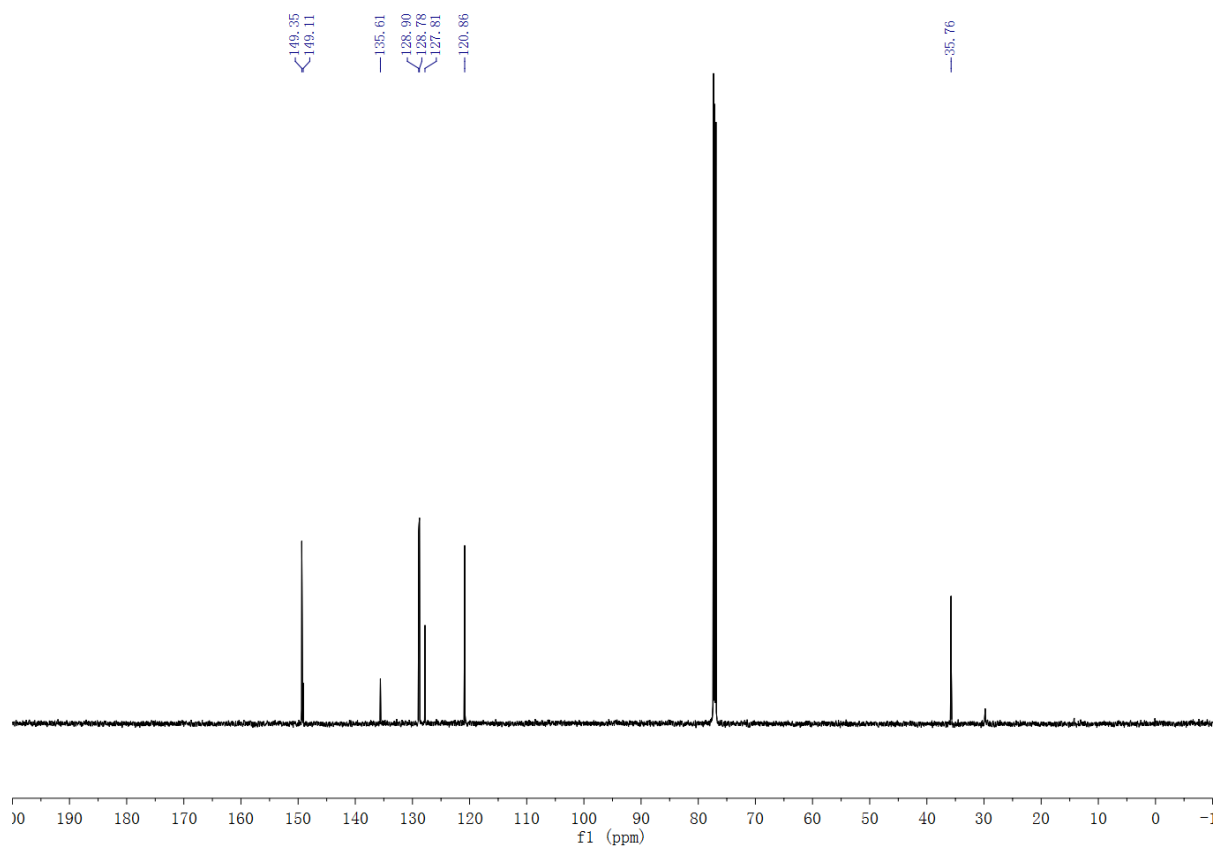

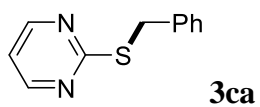

$^1\text{H}$  NMR ( $\text{CDCl}_3$ , 600 M Hz)

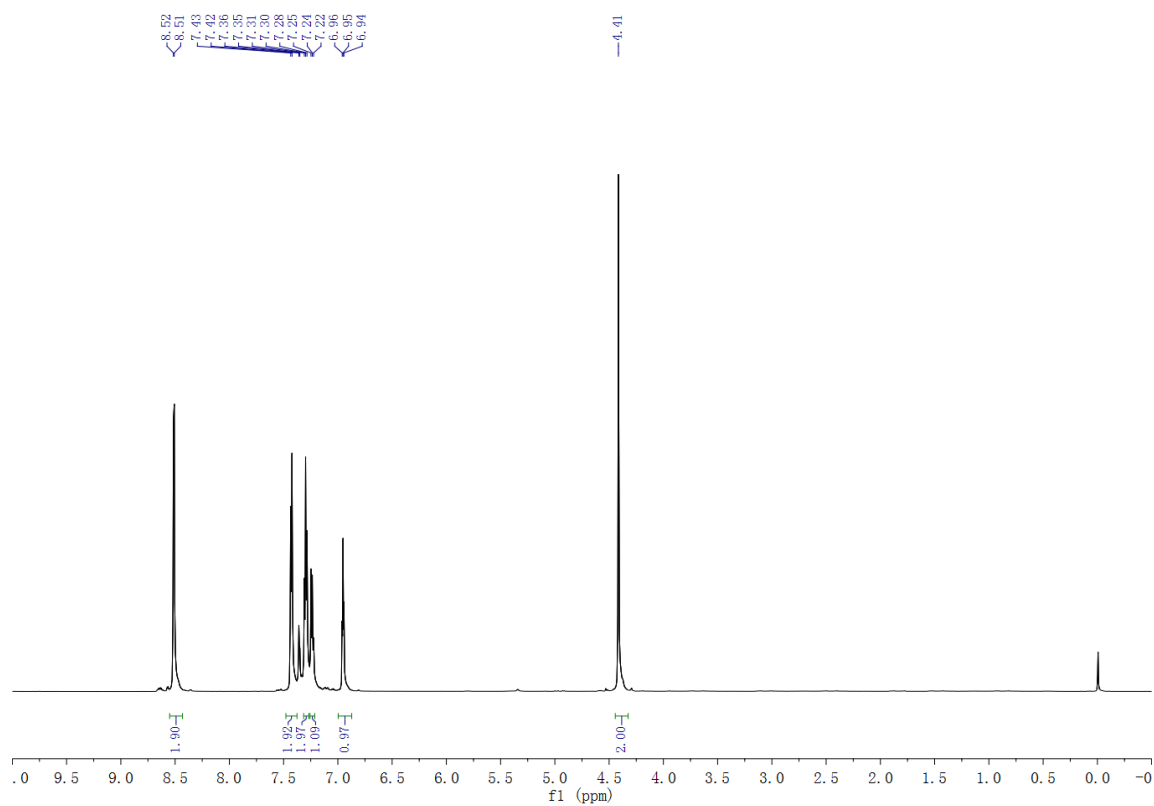

$^{13}\text{C}$  NMR ( $\text{CDCl}_3$ , 150 M Hz)

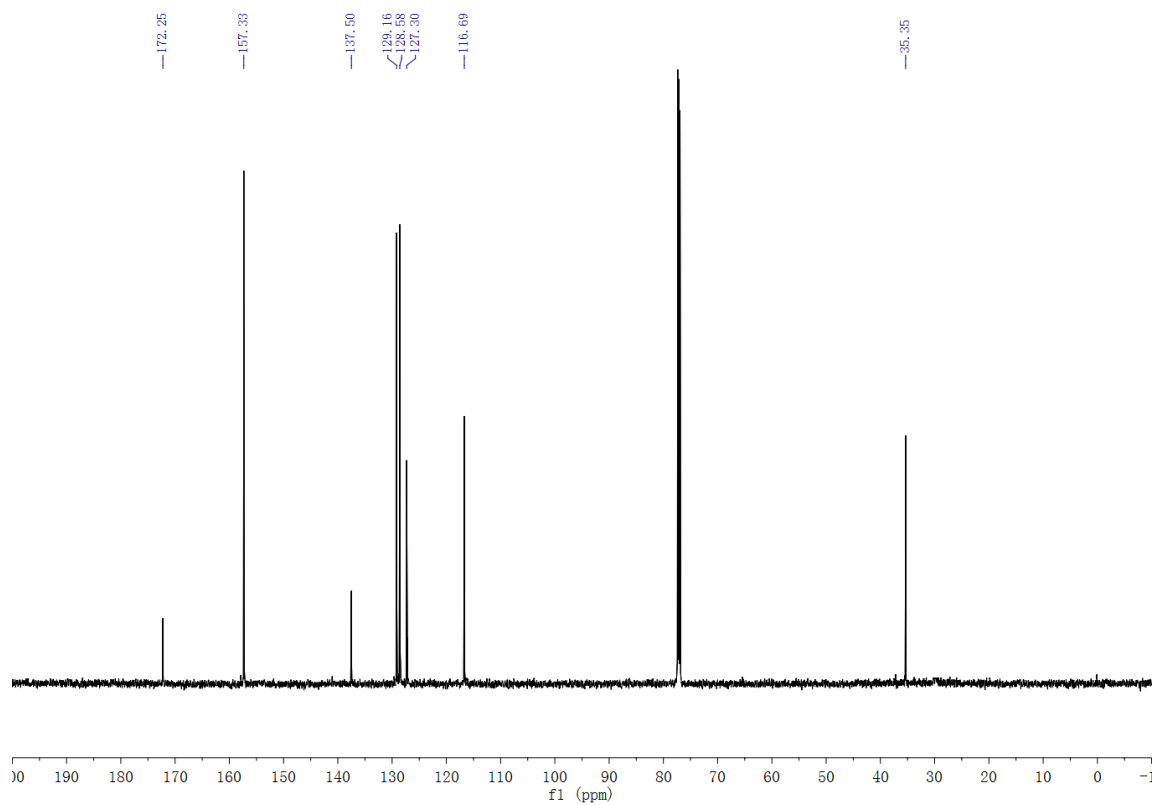



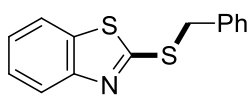

**3da**

$^1\text{H}$  NMR ( $\text{CDCl}_3$ , 600 M Hz)

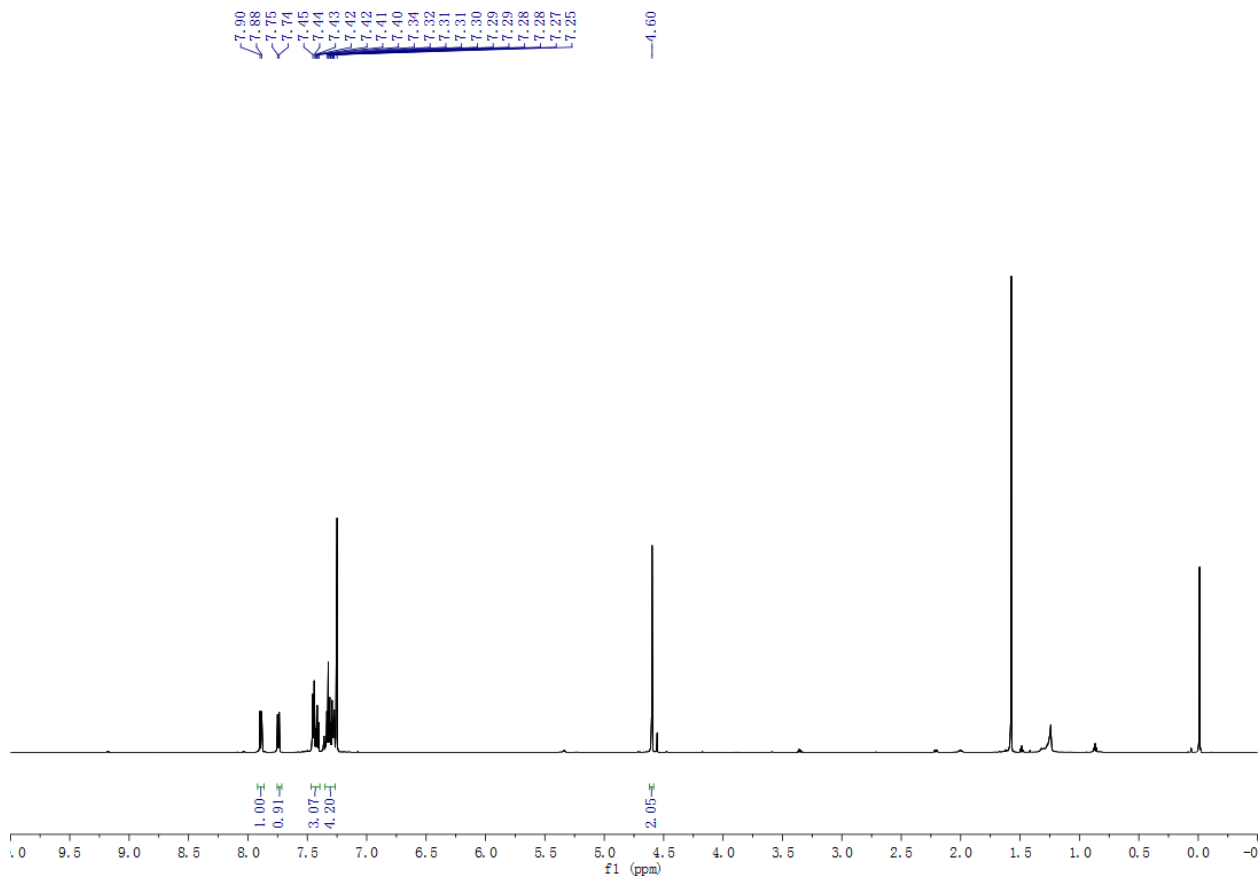

$^{13}\text{C}$  NMR ( $\text{CDCl}_3$ , 150 M Hz)

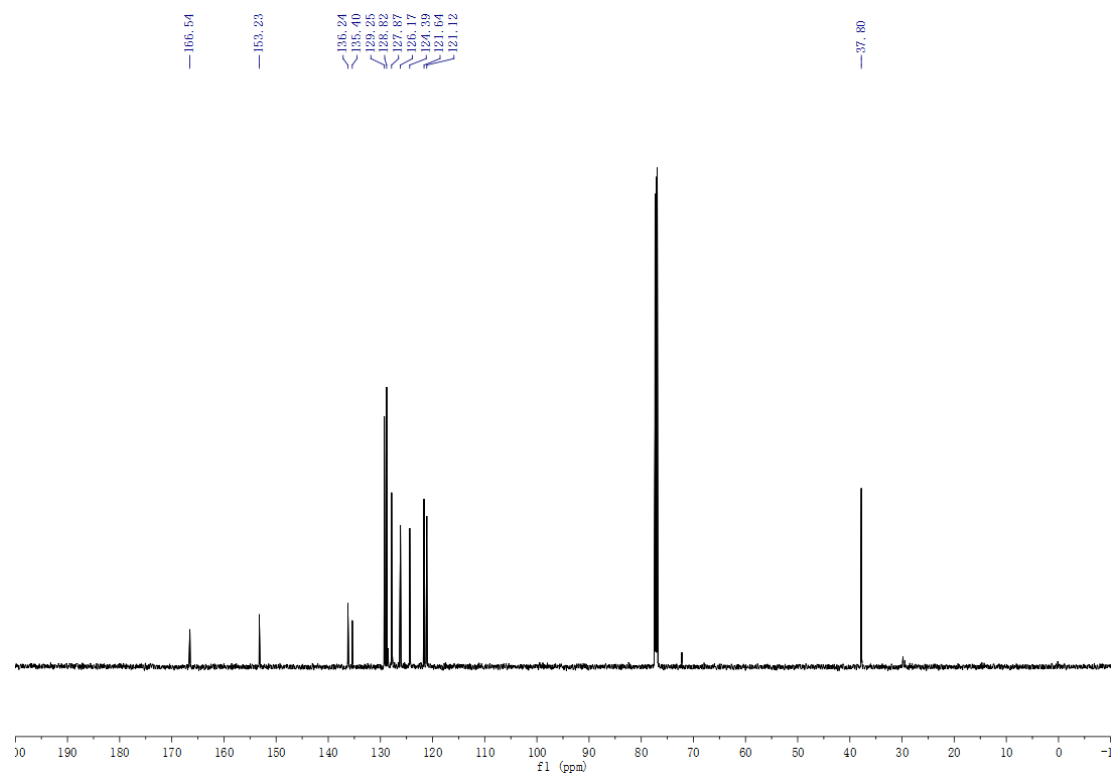

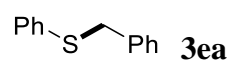

$^1\text{H}$  NMR ( $\text{CDCl}_3$ , 600 M Hz)

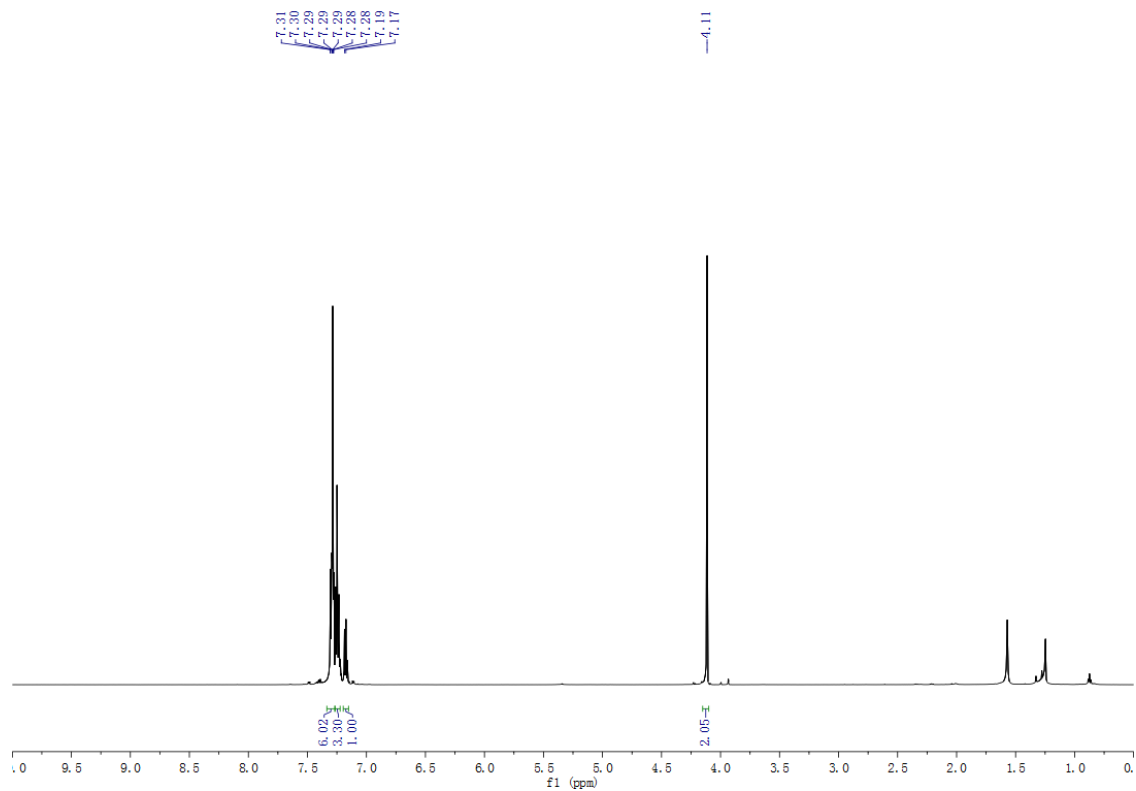

$^{13}\text{C}$  NMR ( $\text{CDCl}_3$ , 150 M Hz)

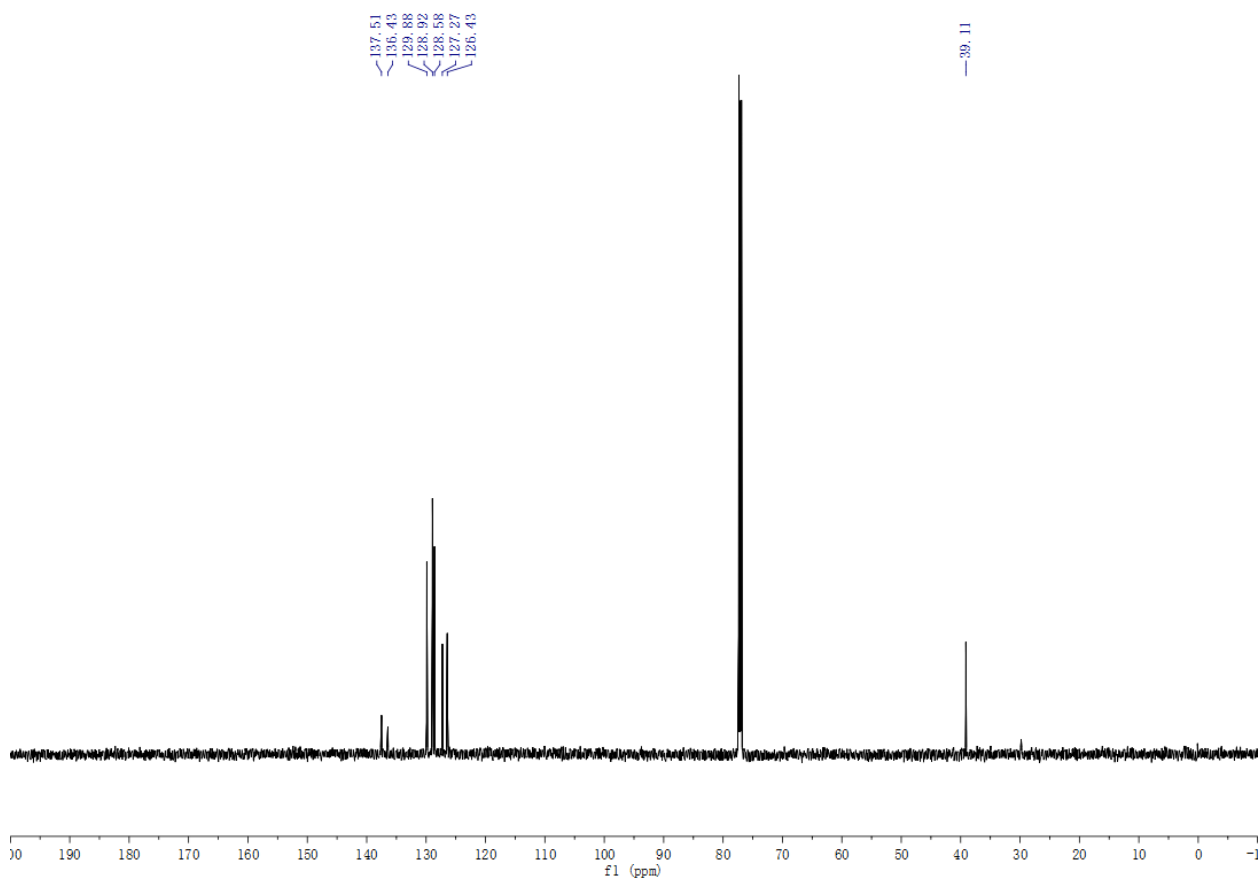

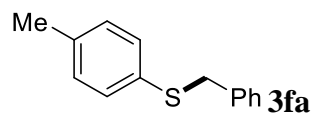

$^1\text{H NMR}$  ( $\text{CDCl}_3$ , 600 M Hz)

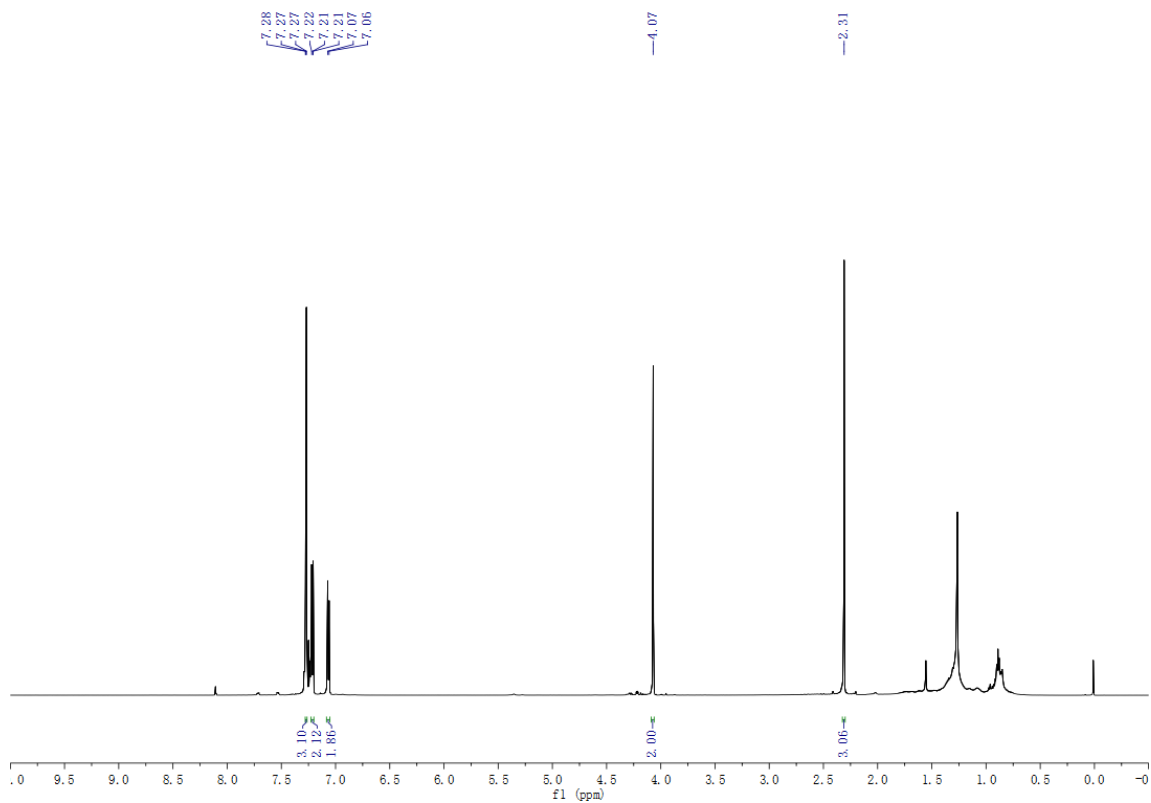

$^{13}\text{C NMR}$  ( $\text{CDCl}_3$ , 150 M Hz)

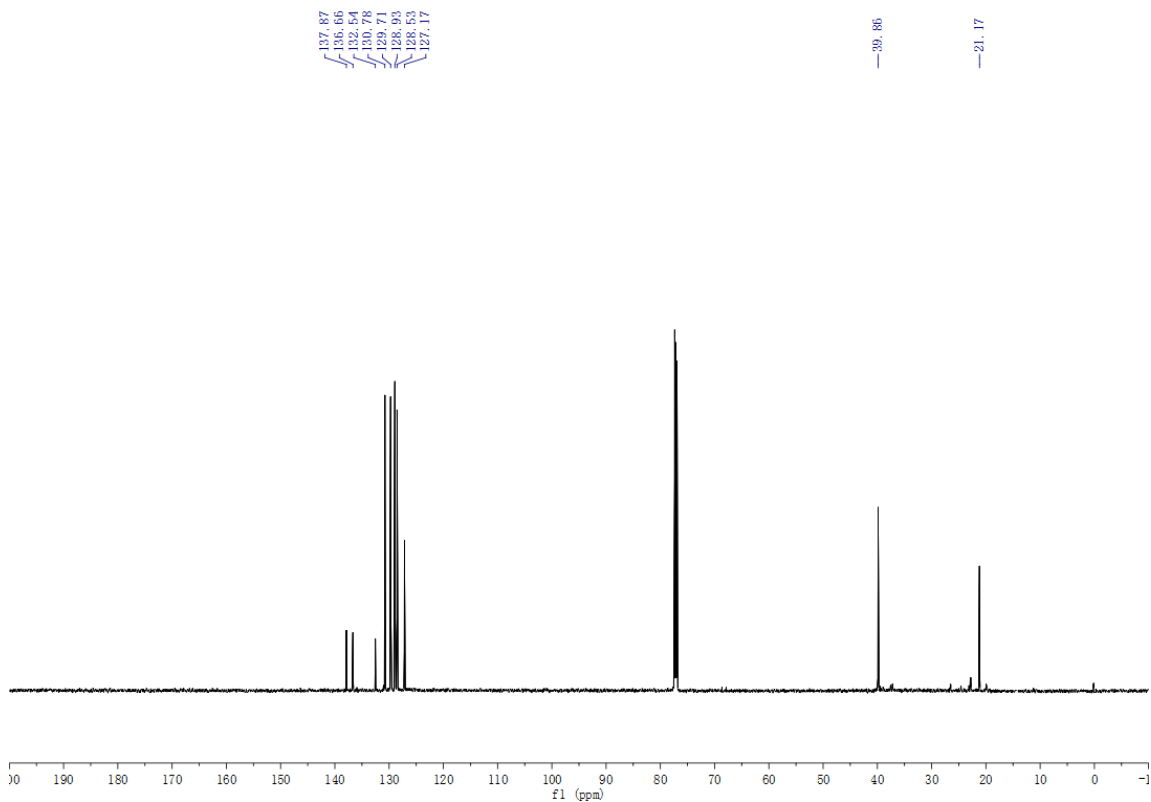

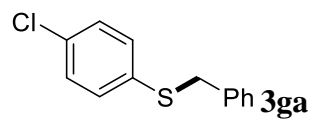

$^1\text{H}$  NMR ( $\text{CDCl}_3$ , 600 M Hz)

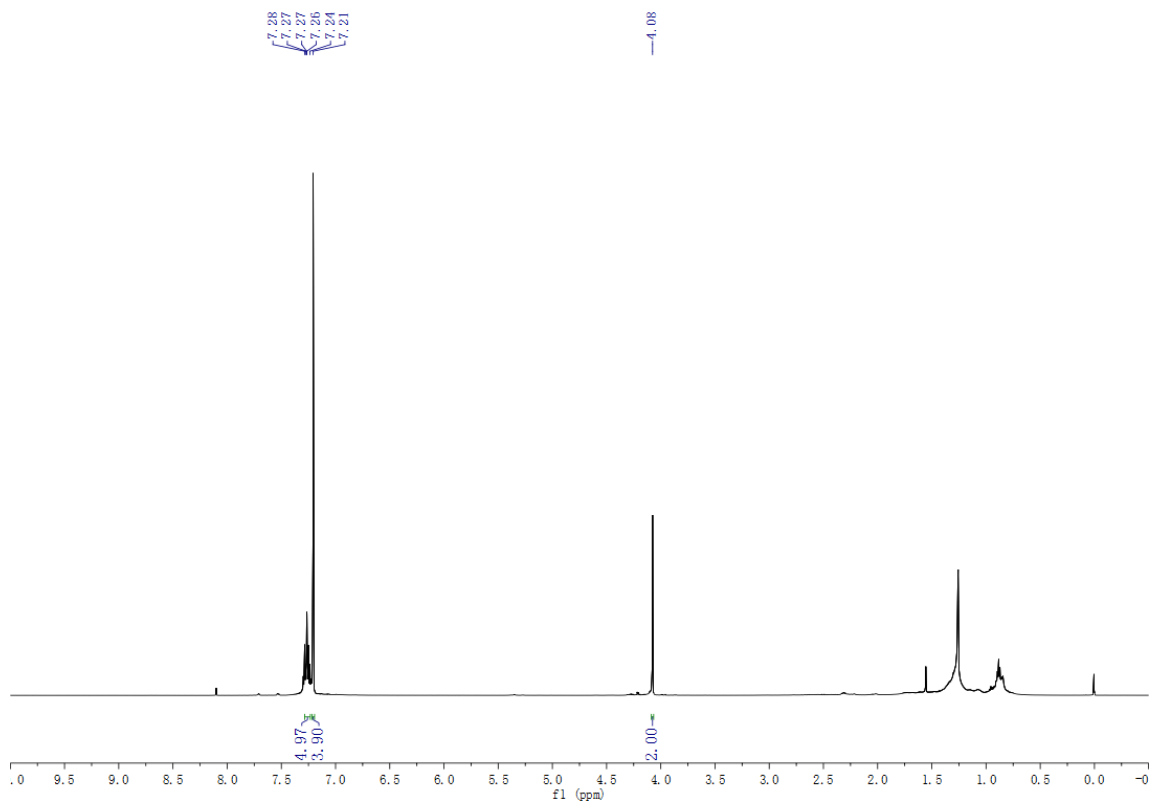

$^{13}\text{C}$  NMR ( $\text{CDCl}_3$ , 150 M Hz)

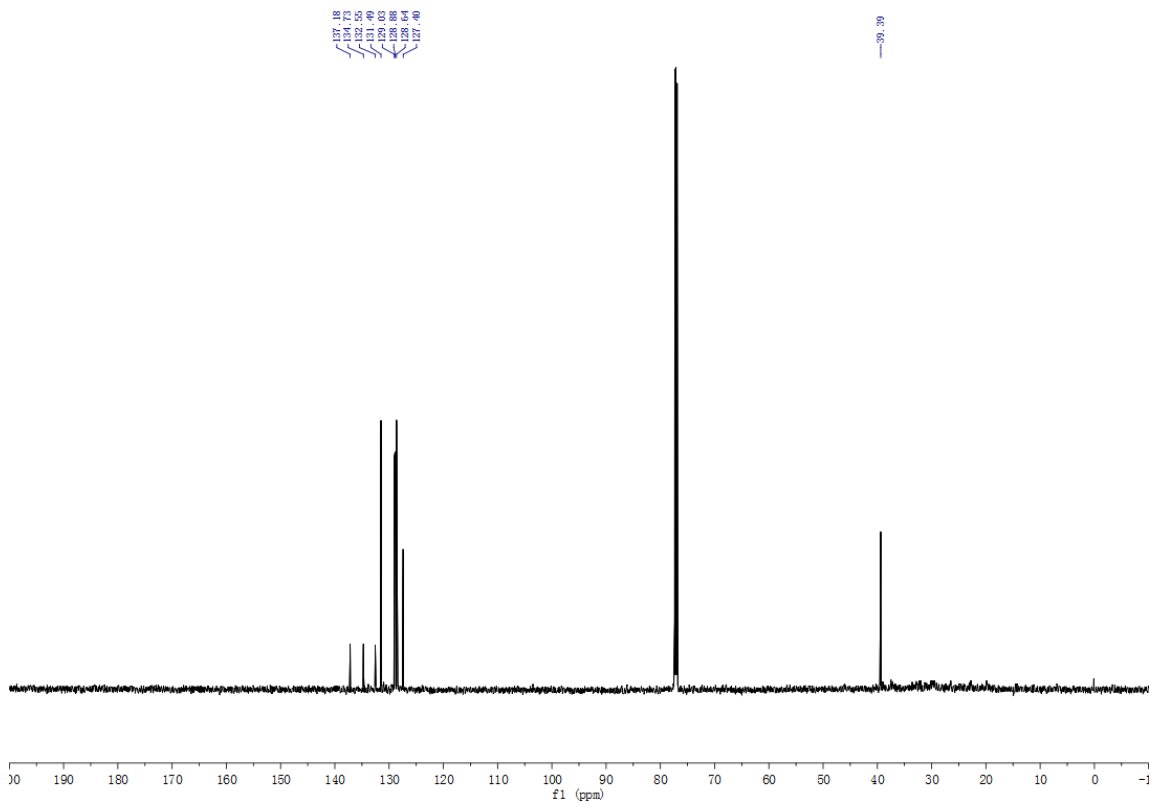

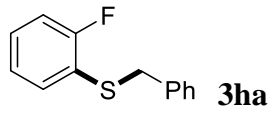

<sup>1</sup>H NMR (CDCl<sub>3</sub>, 600 M Hz)

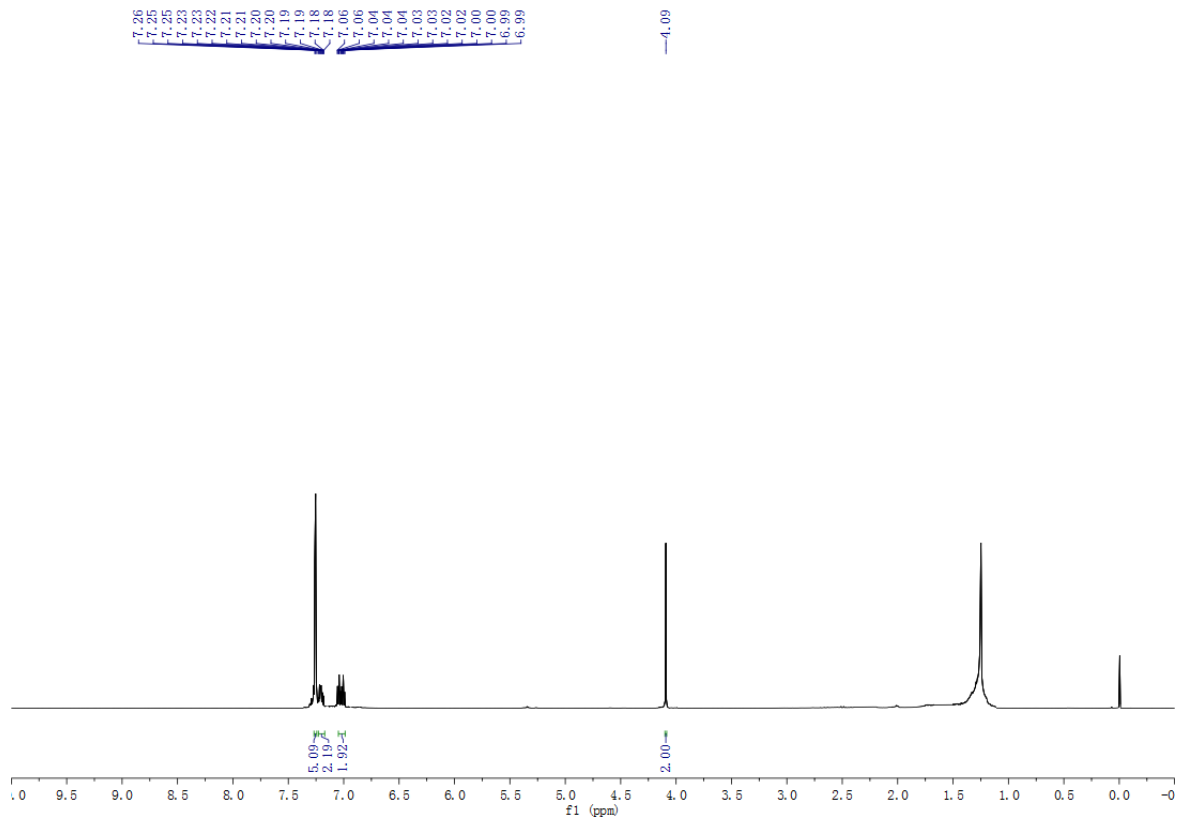

<sup>13</sup>C NMR (CDCl<sub>3</sub>, 150 M Hz)

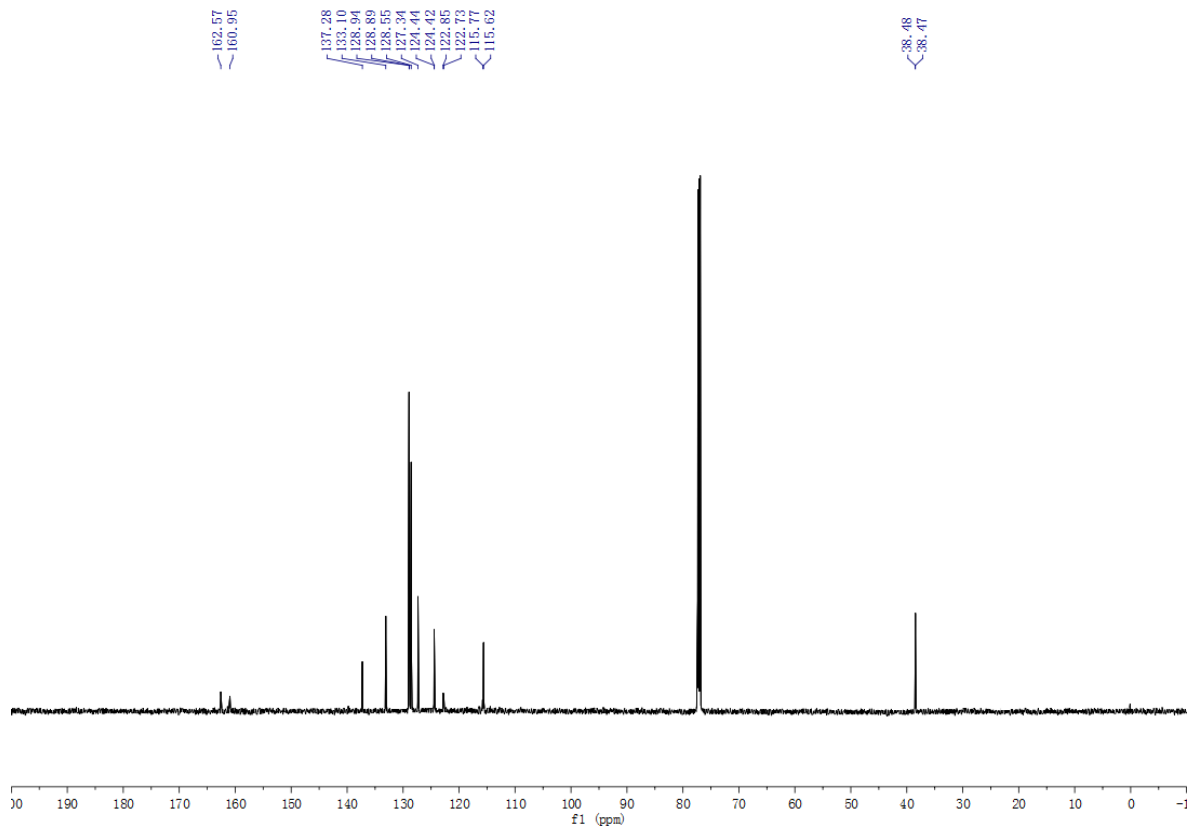

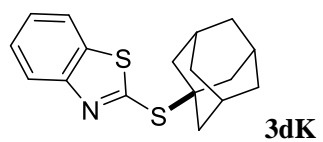

$^1\text{H NMR}$  ( $\text{CDCl}_3$ , 600 MHz)

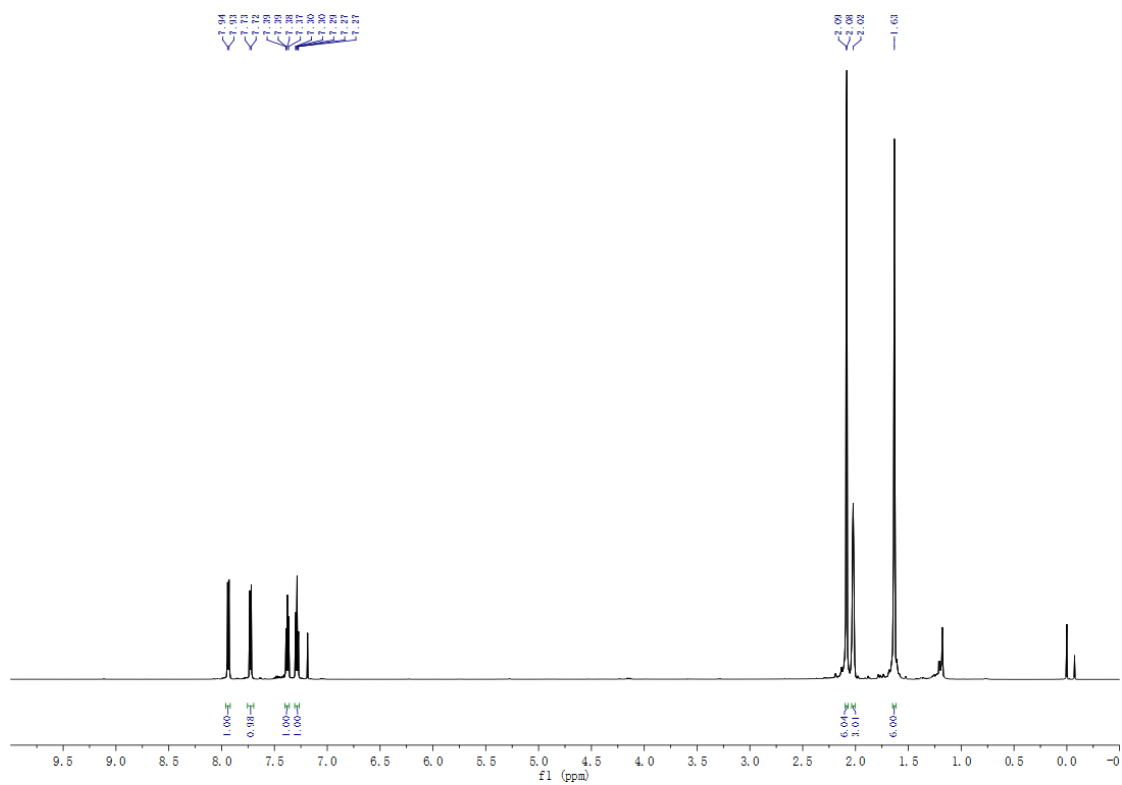

$^{13}\text{C NMR}$  ( $\text{CDCl}_3$ , 150 MHz)

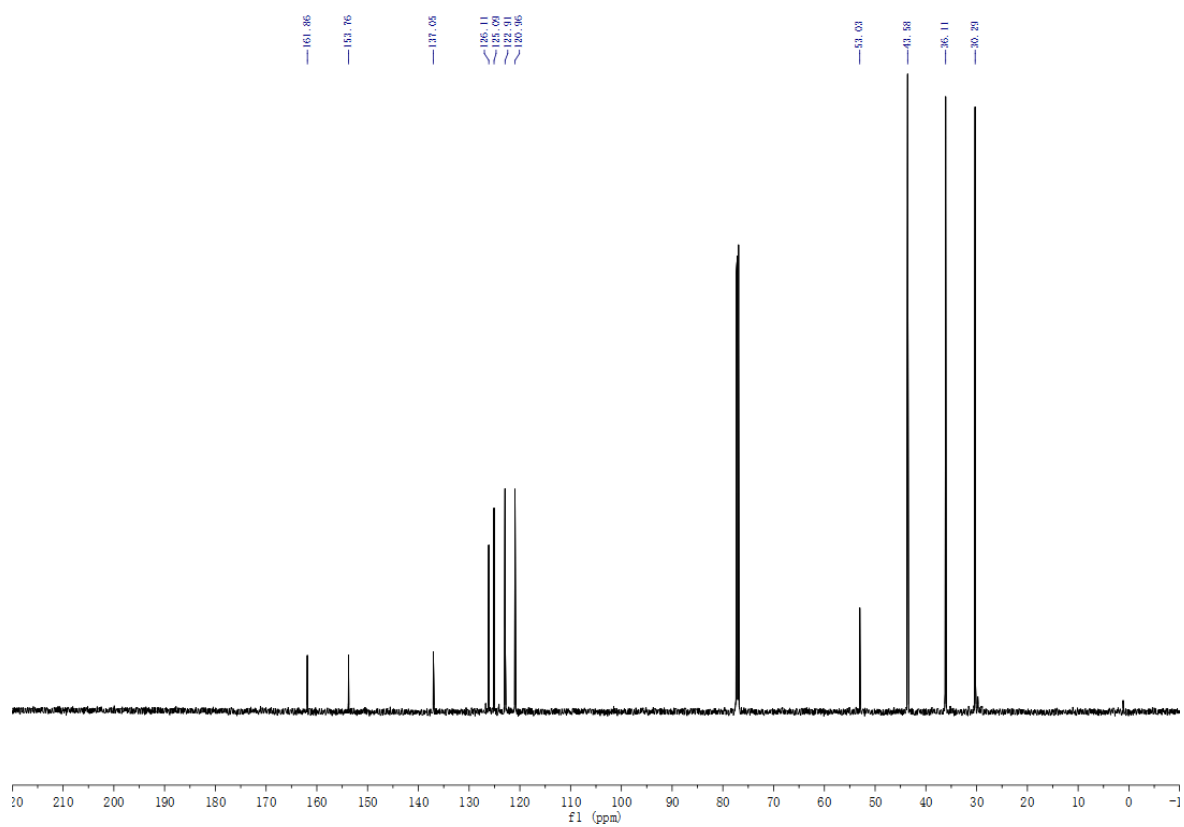

# IR

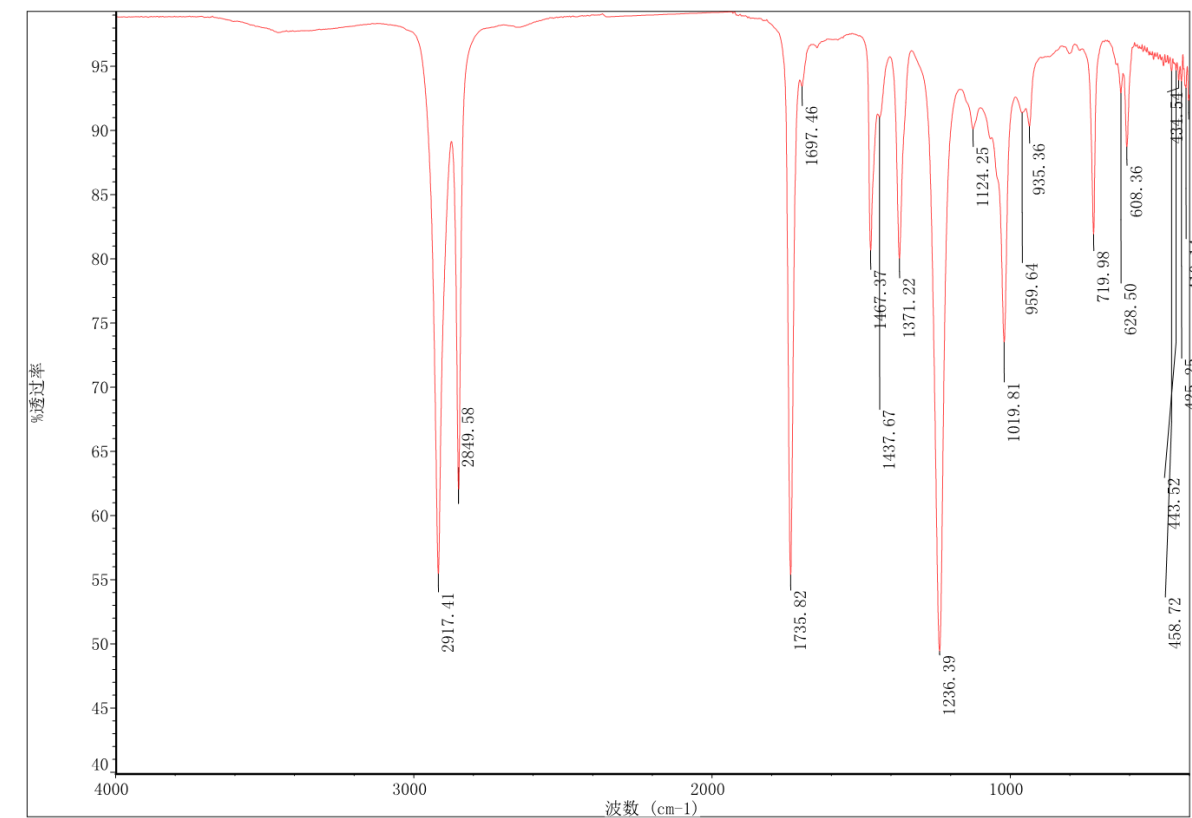

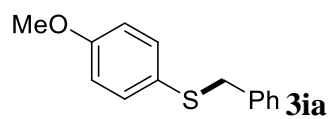

$^1\text{H}$  NMR ( $\text{CDCl}_3$ , 600 M Hz)

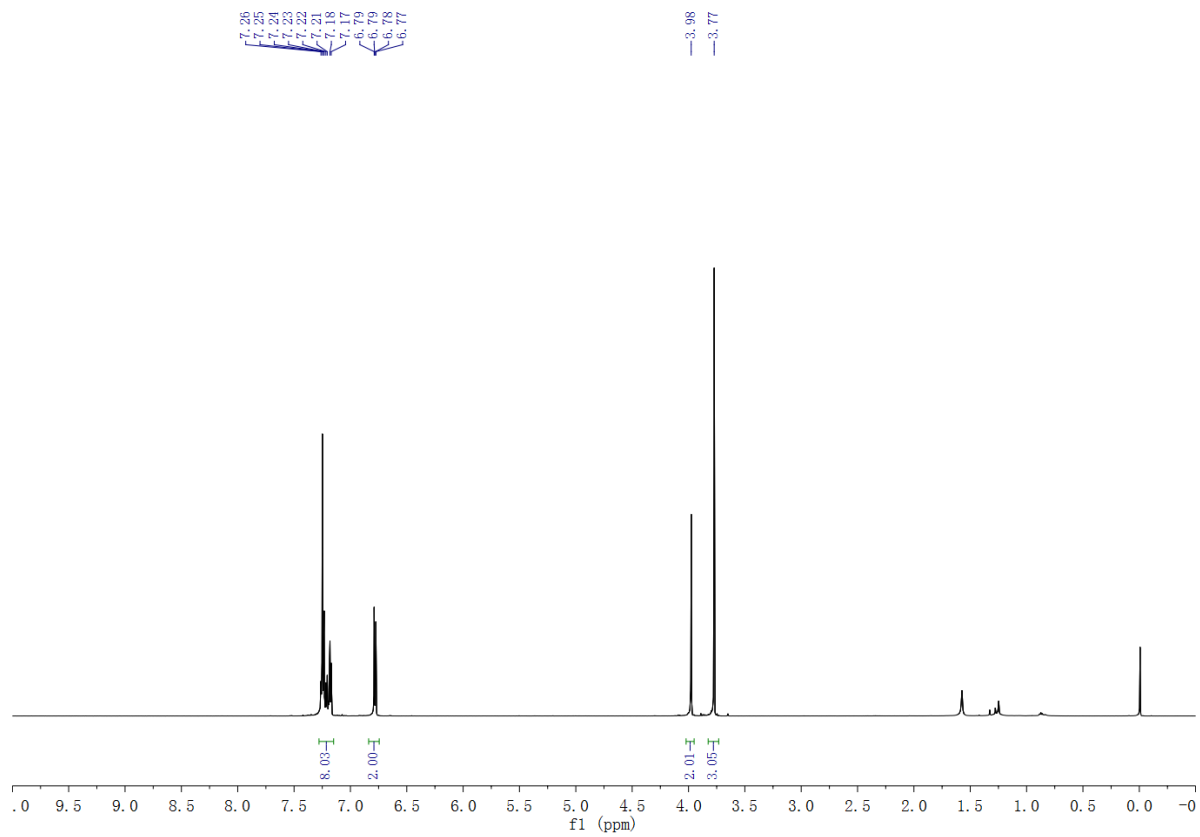

$^{13}\text{C}$  NMR ( $\text{CDCl}_3$ , 150 M Hz)

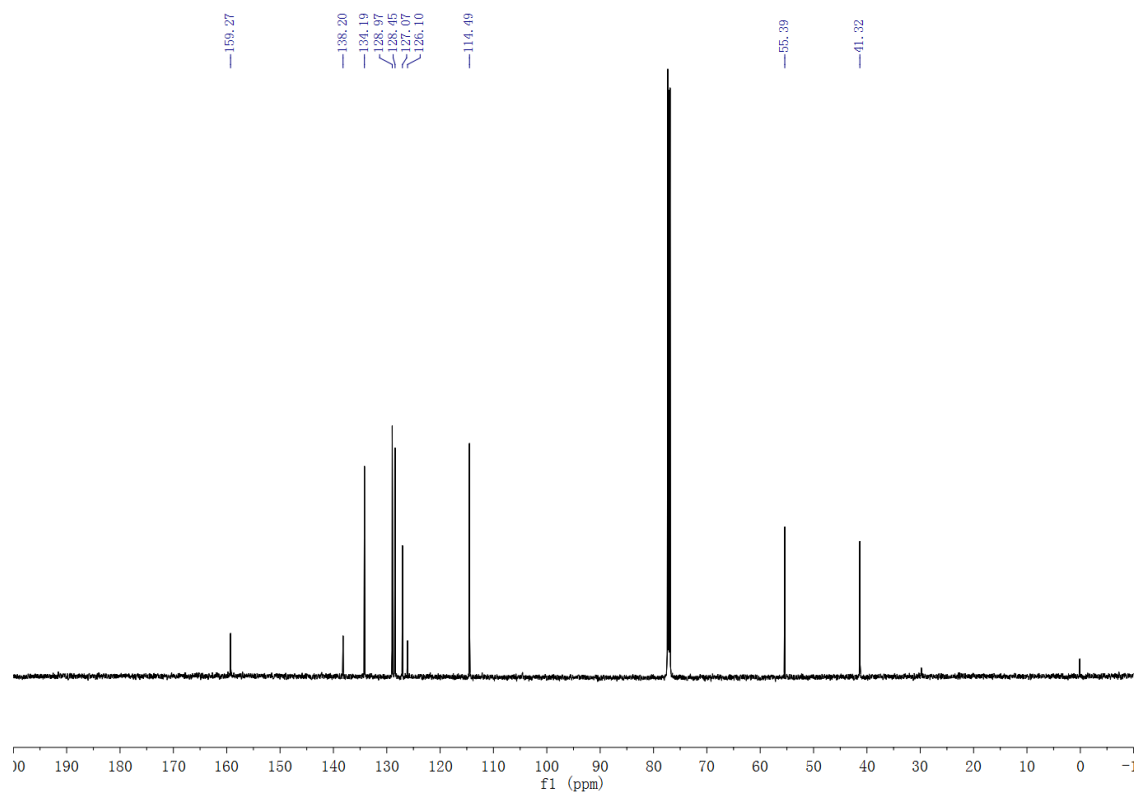



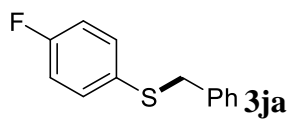

$^1\text{H}$  NMR ( $\text{CDCl}_3$ , 600 M Hz)

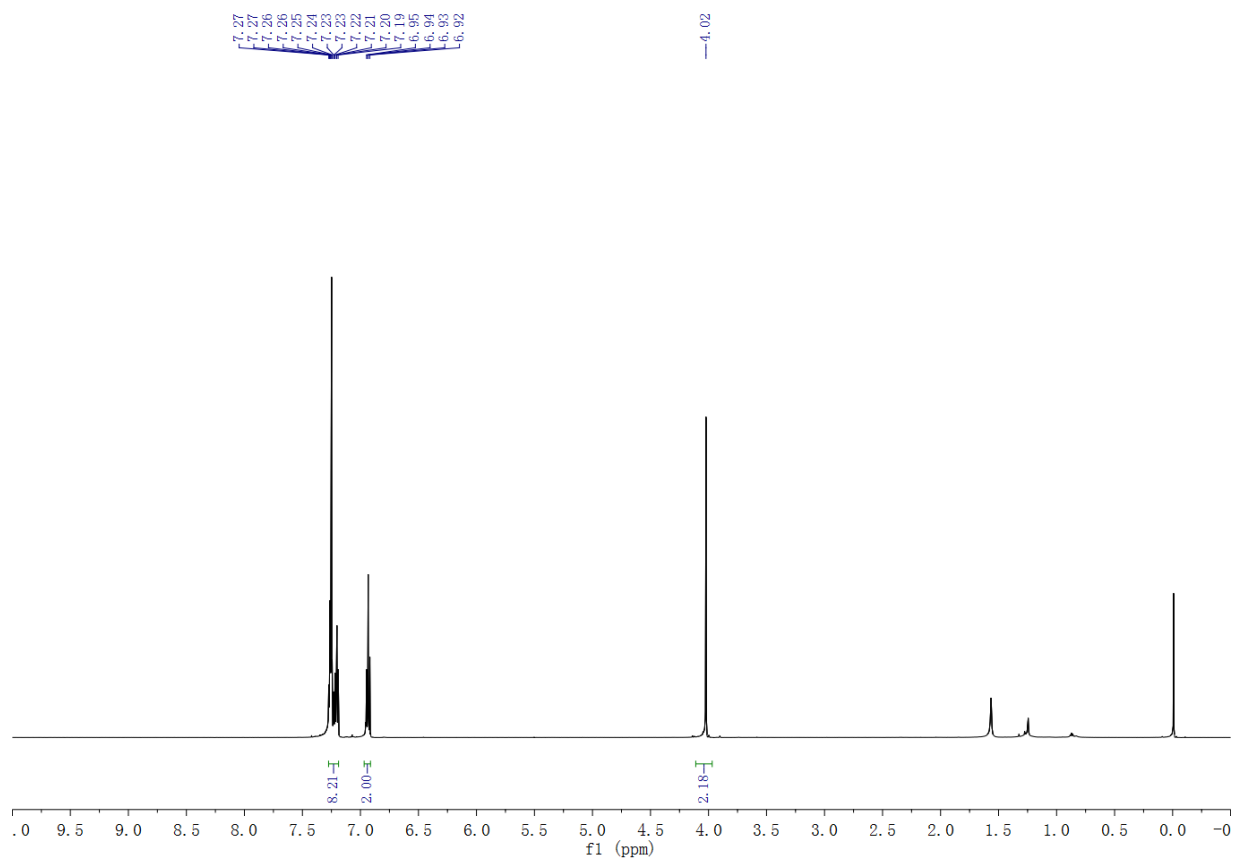

$^{13}\text{C}$  NMR ( $\text{CDCl}_3$ , 150 M Hz)

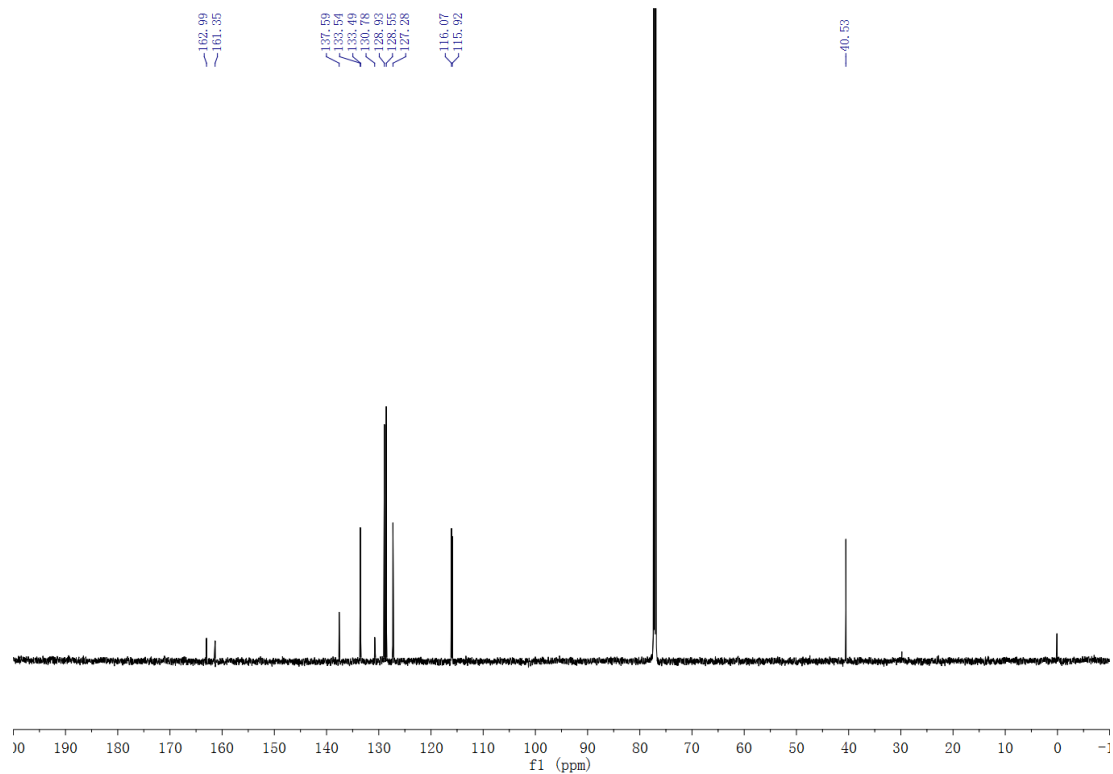

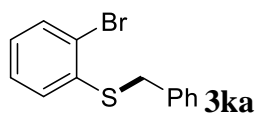

$^1\text{H NMR}$  ( $\text{CDCl}_3$ , 600 M Hz)

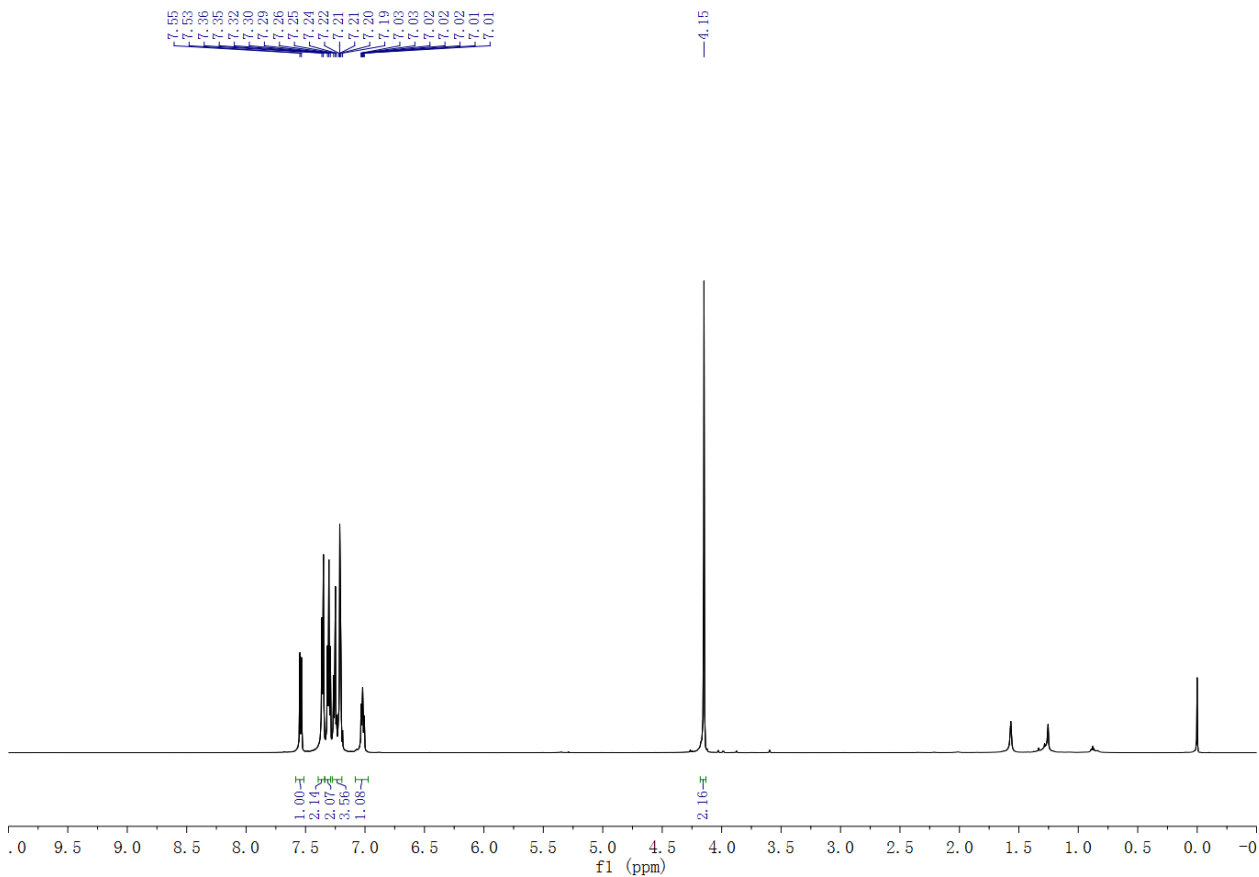

$^{13}\text{C NMR}$  ( $\text{CDCl}_3$ , 150 M Hz)

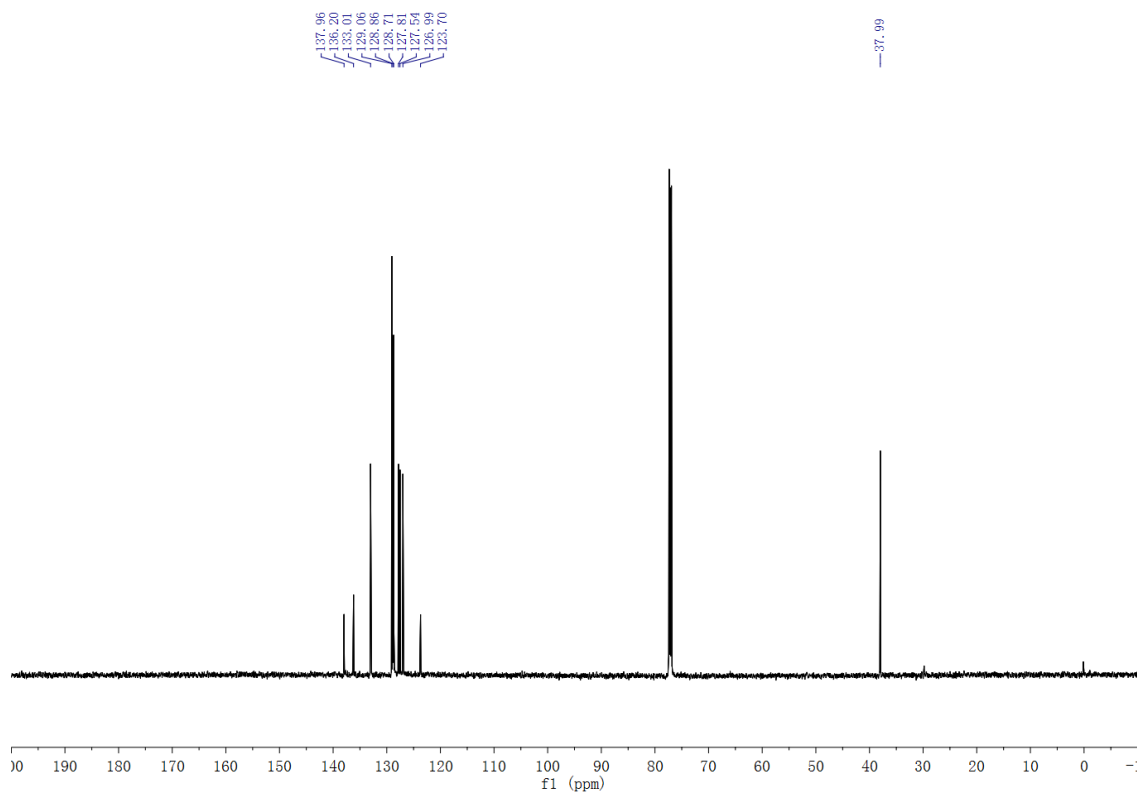

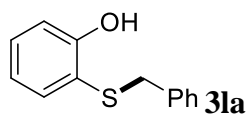

$^1\text{H NMR}$  ( $\text{CDCl}_3$ , 600 M Hz)

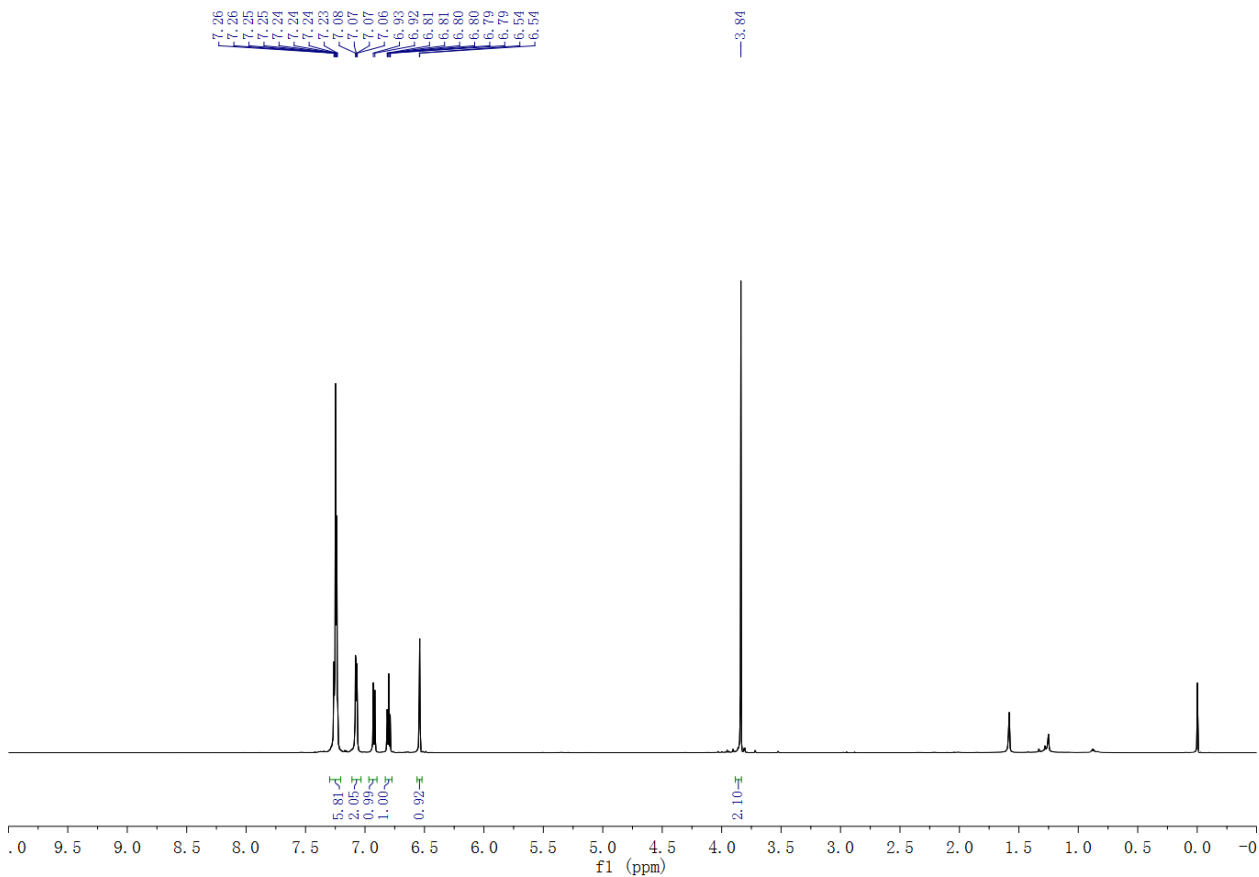

$^{13}\text{C NMR}$  ( $\text{CDCl}_3$ , 150 M Hz)

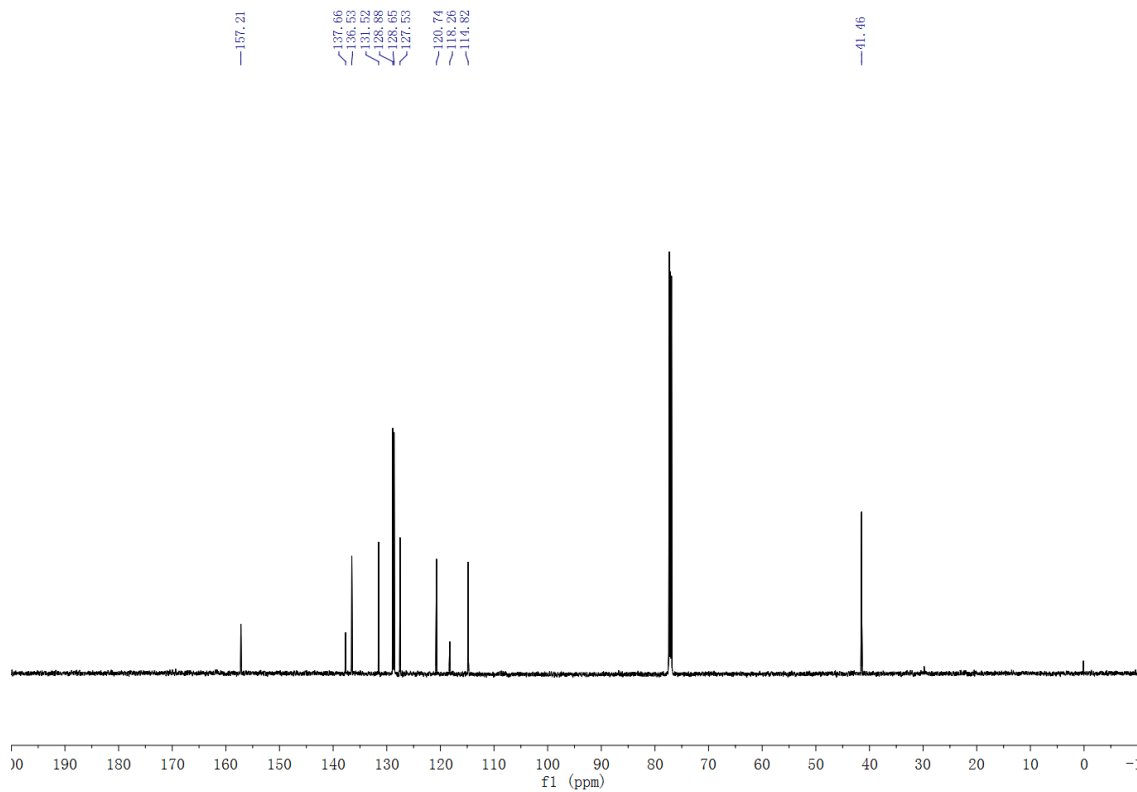

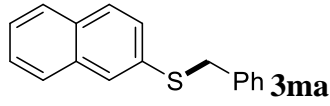

$^1\text{H}$  NMR ( $\text{CDCl}_3$ , 600 M Hz)

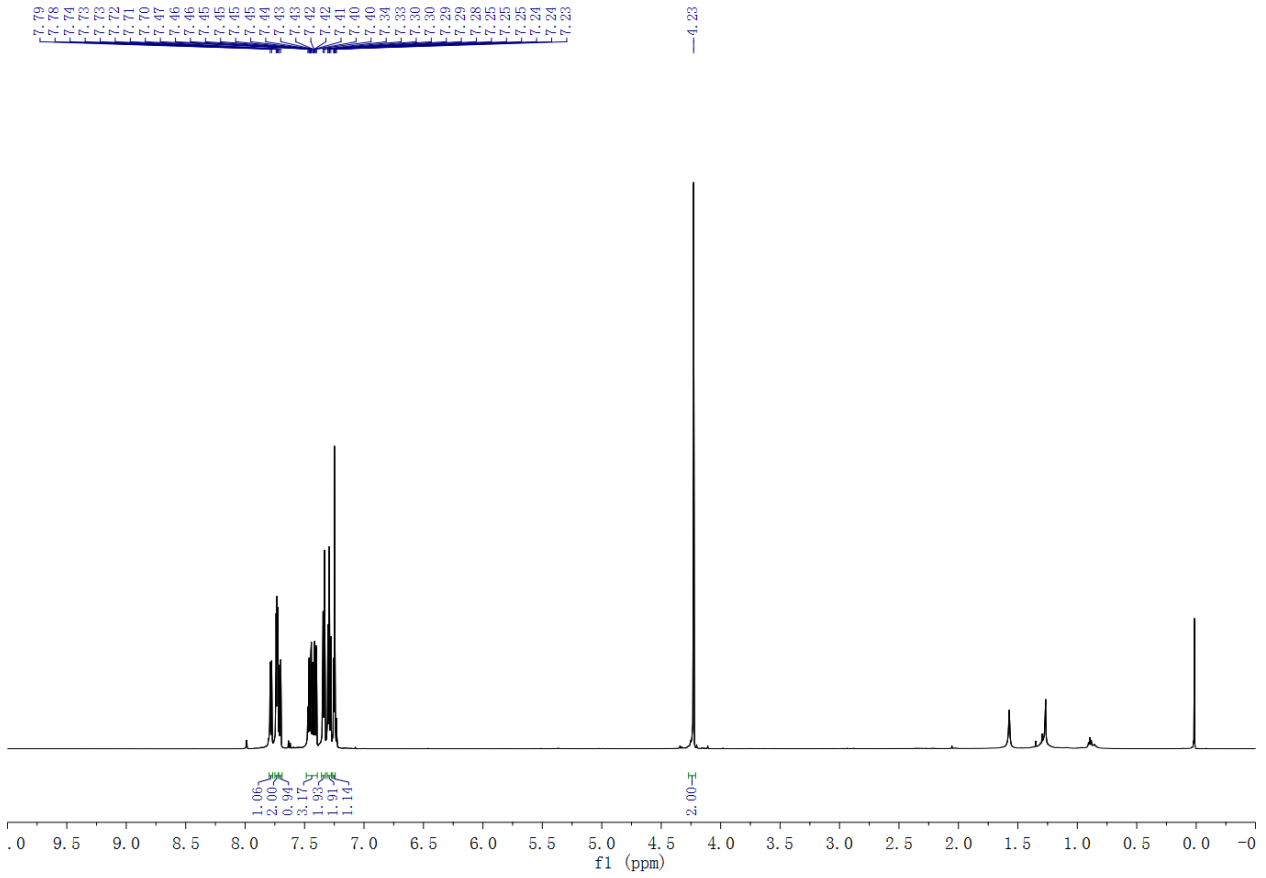

$^{13}\text{C}$  NMR ( $\text{CDCl}_3$ , 150 M Hz)

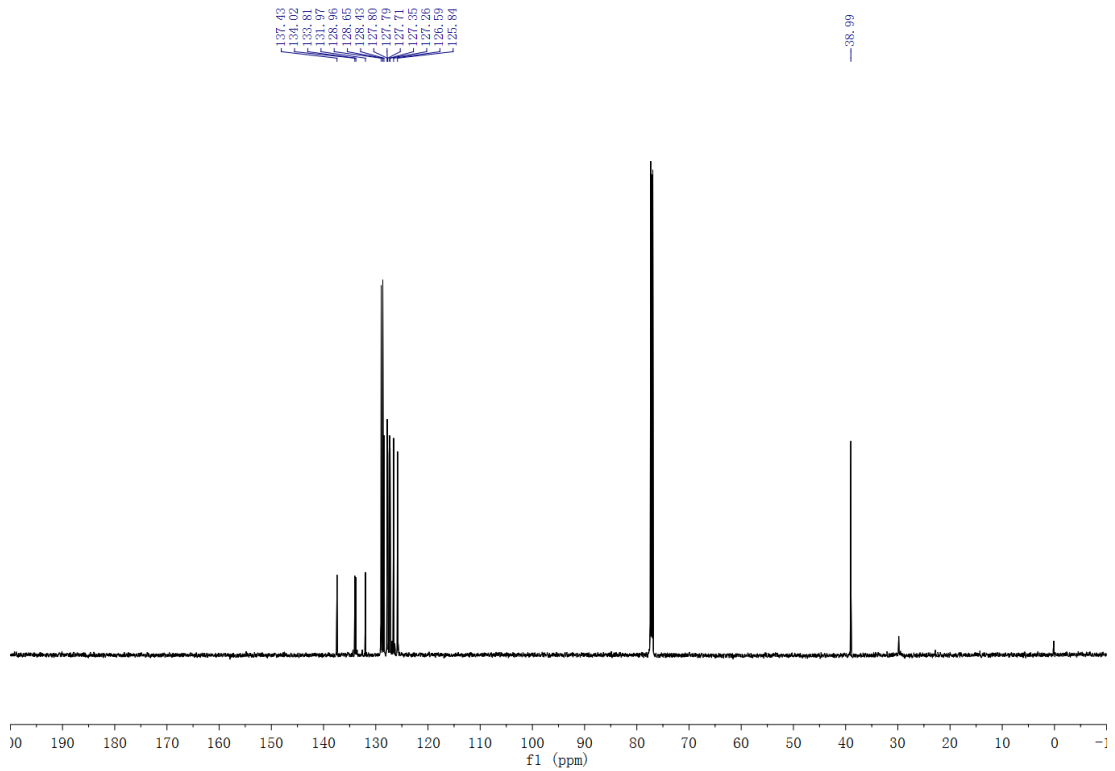

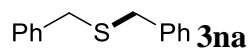

<sup>1</sup>H NMR (CDCl<sub>3</sub>, 600 MHz)

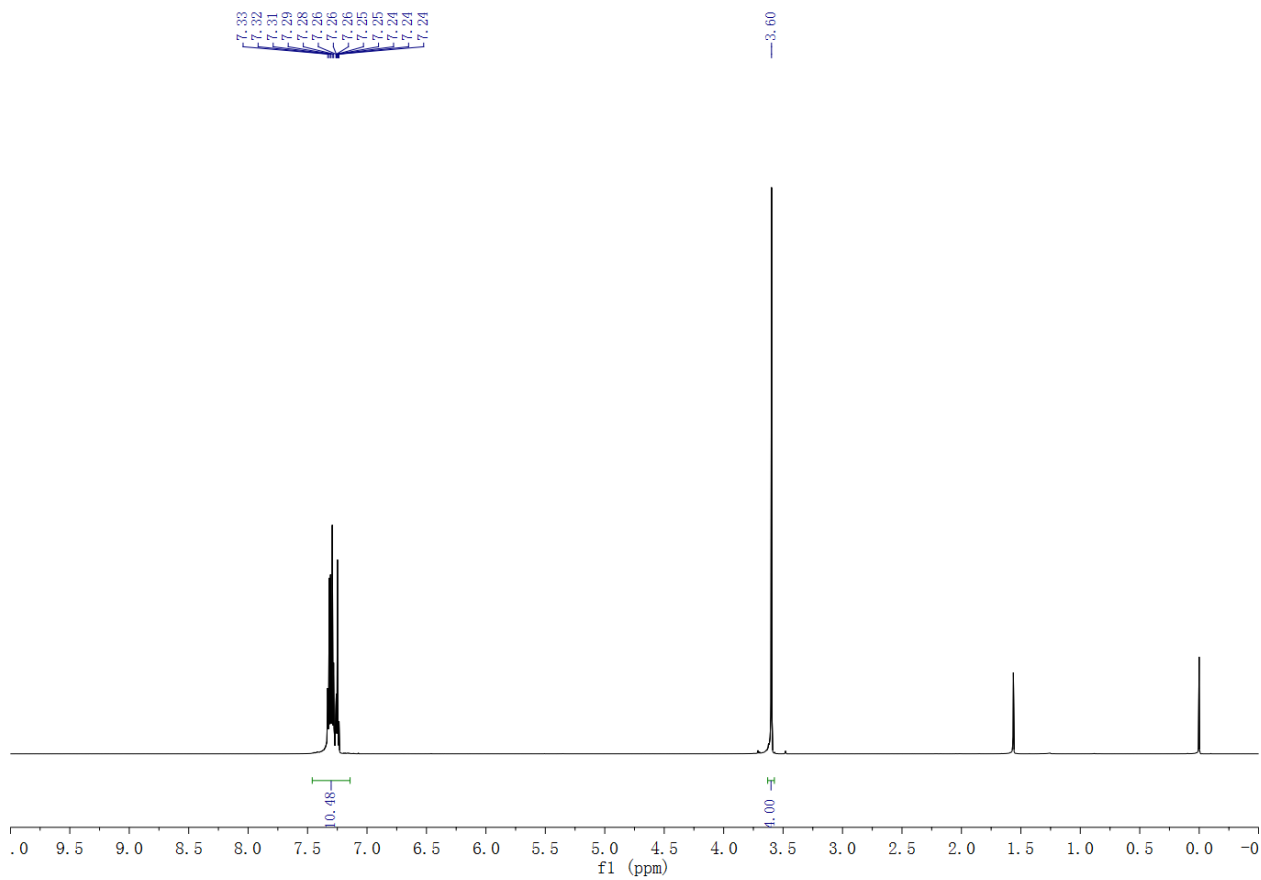

<sup>13</sup>C NMR (CDCl<sub>3</sub>, 150 MHz)

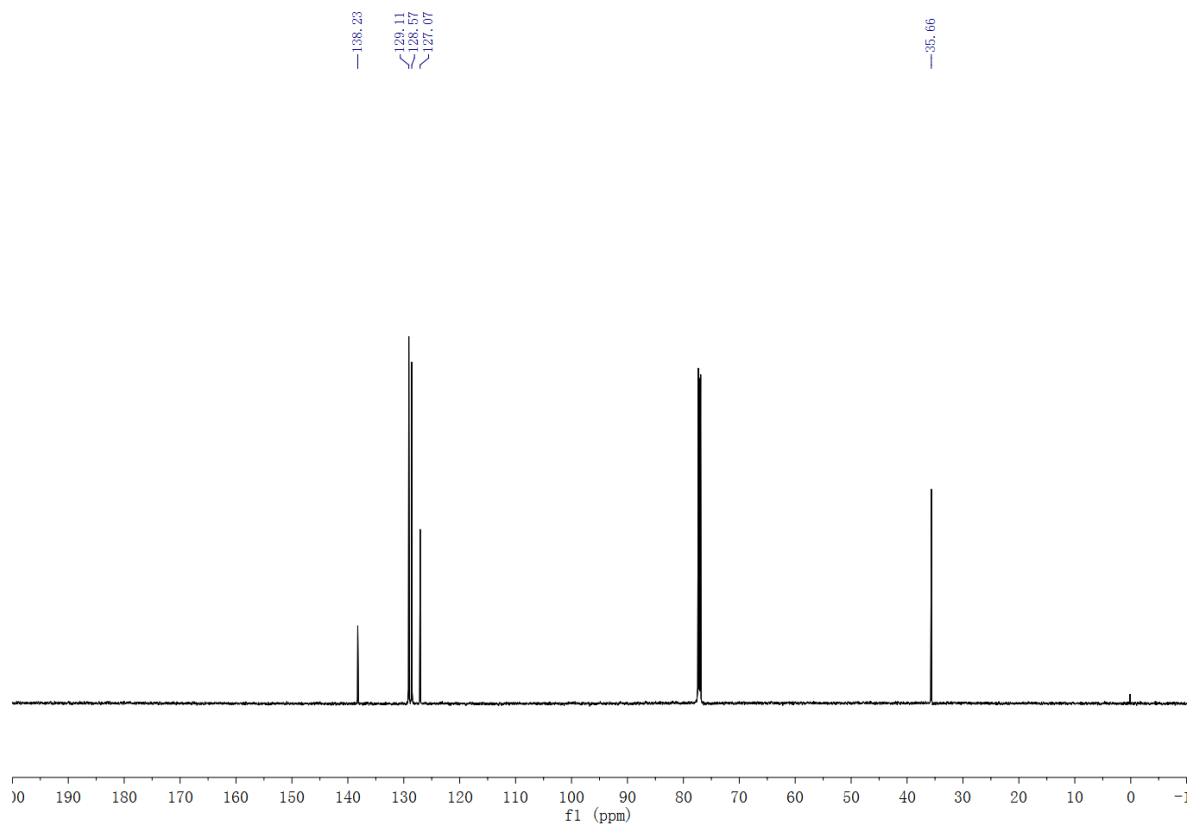



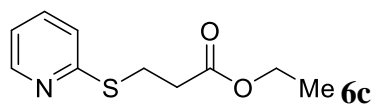

$^1\text{H}$  NMR ( $\text{CDCl}_3$ , 600 MHz)

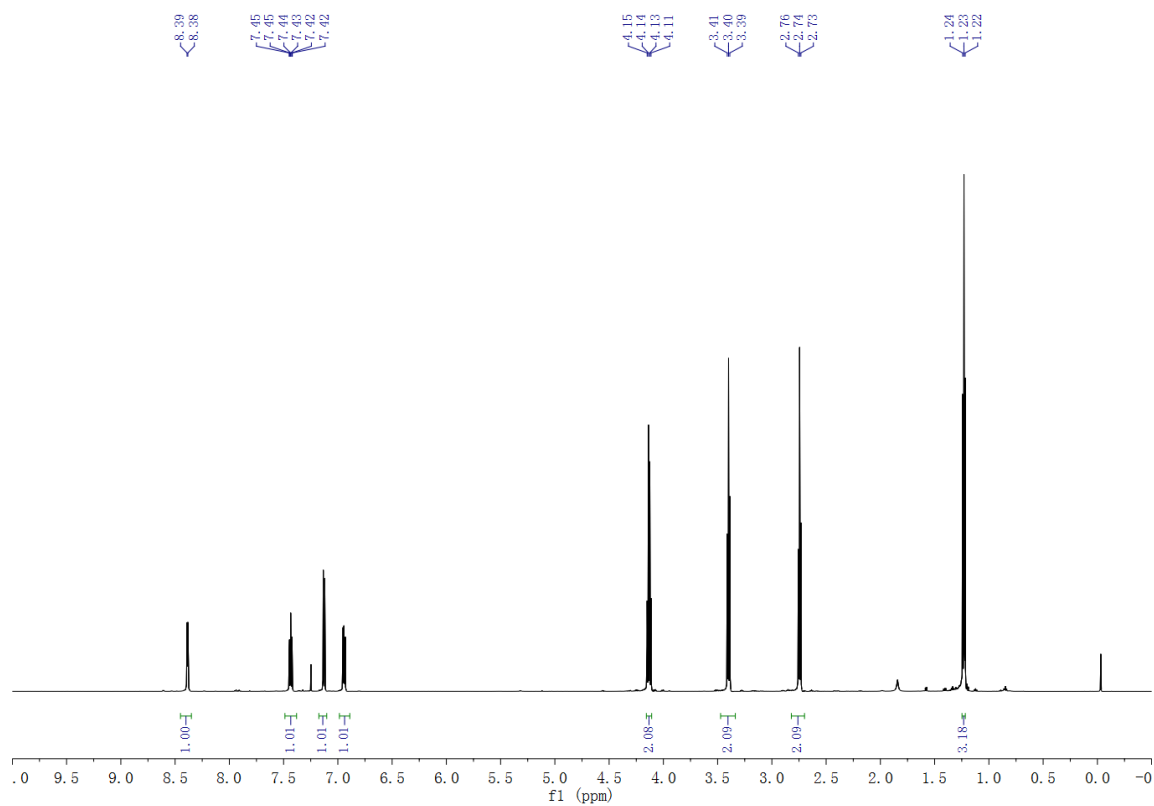

$^{13}\text{C}$  NMR ( $\text{CDCl}_3$ , 150 MHz)

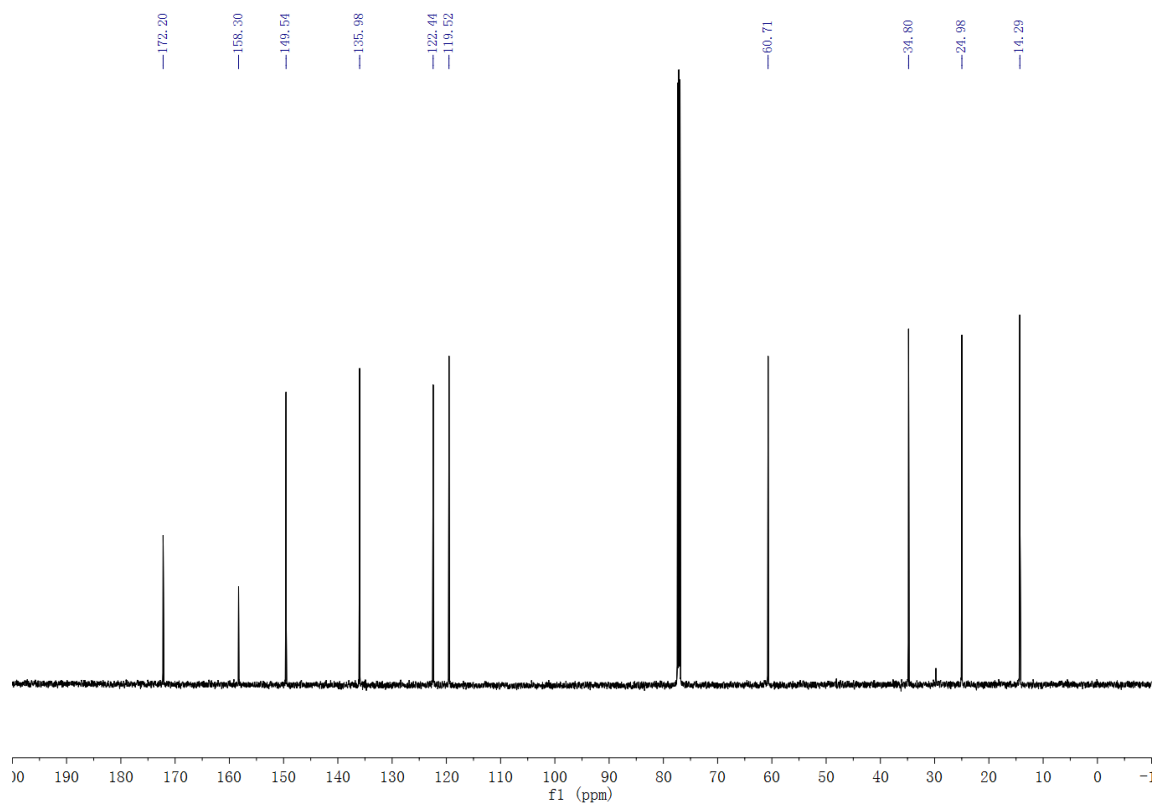

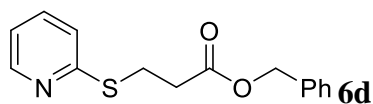

$^1\text{H}$  NMR ( $\text{CDCl}_3$ , 600 M Hz)

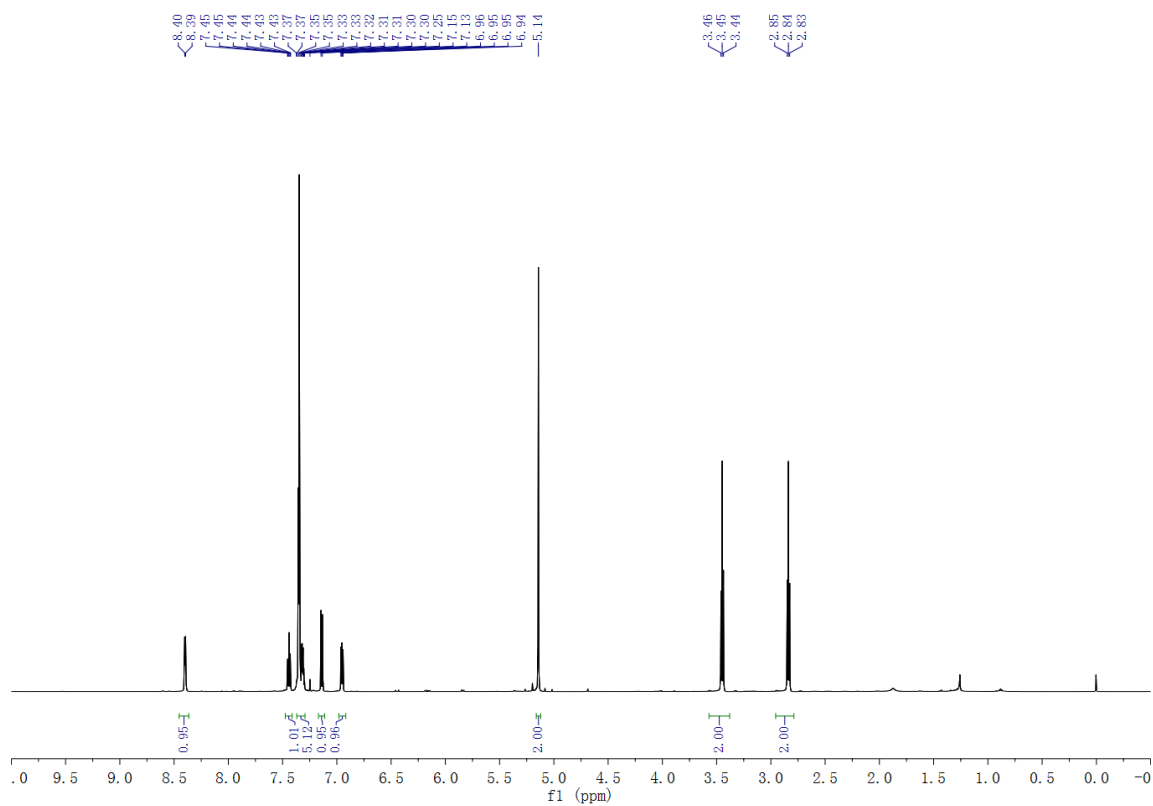

$^{13}\text{C}$  NMR ( $\text{CDCl}_3$ , 150 M Hz)

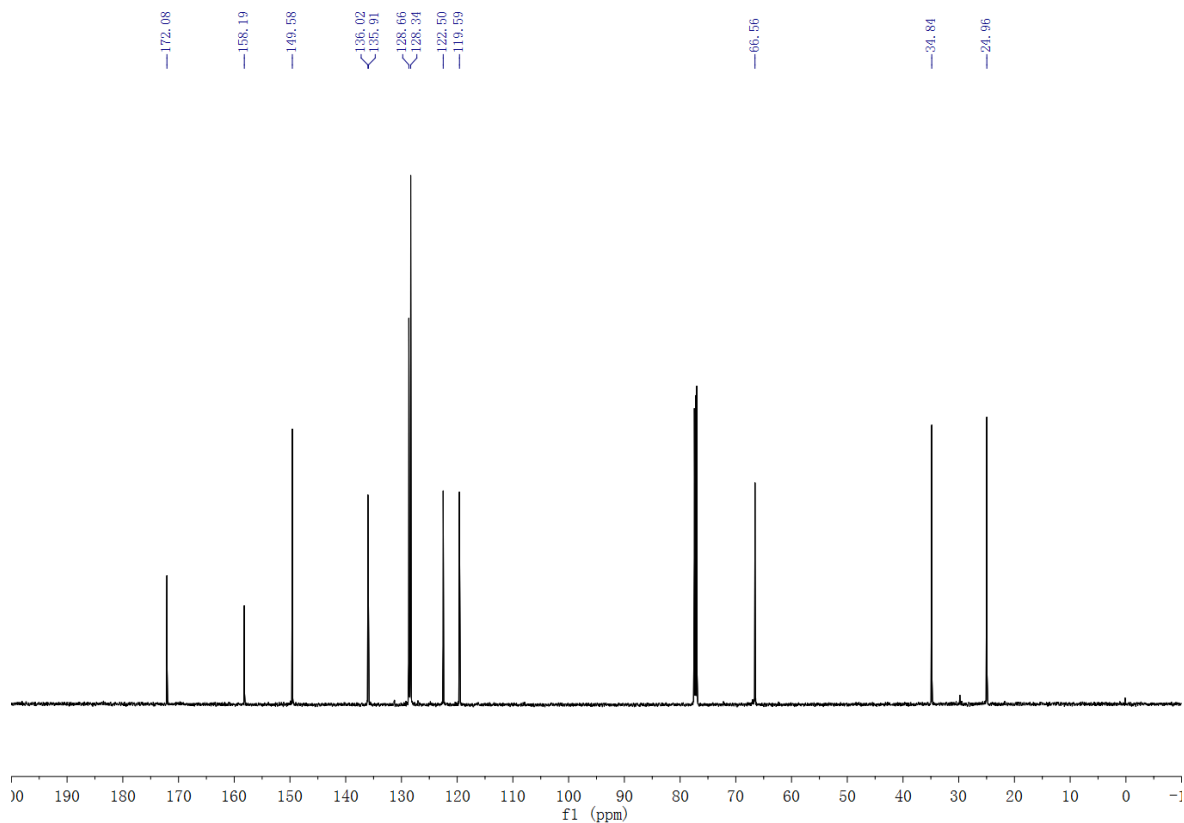



# IR

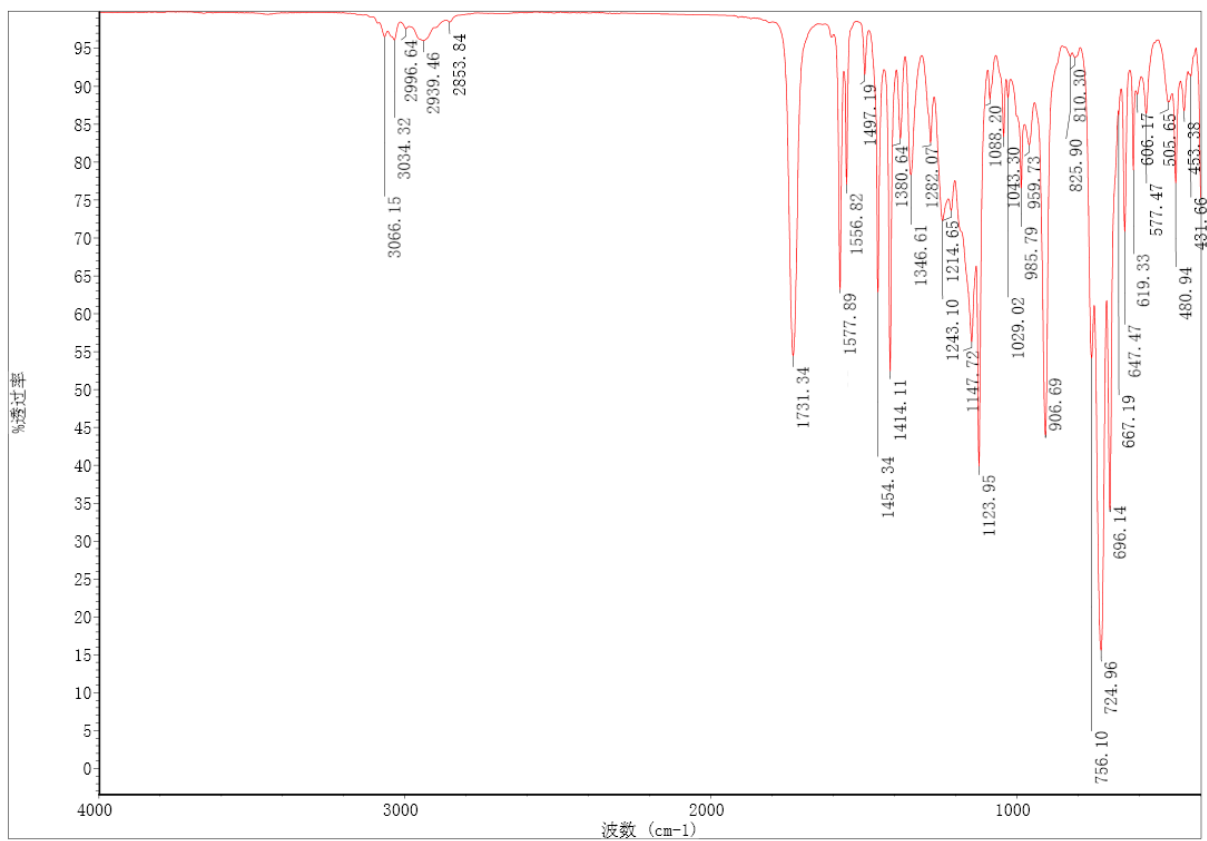

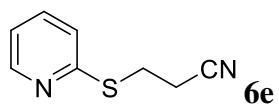

$^1\text{H}$  NMR ( $\text{CDCl}_3$ , 600 M Hz)

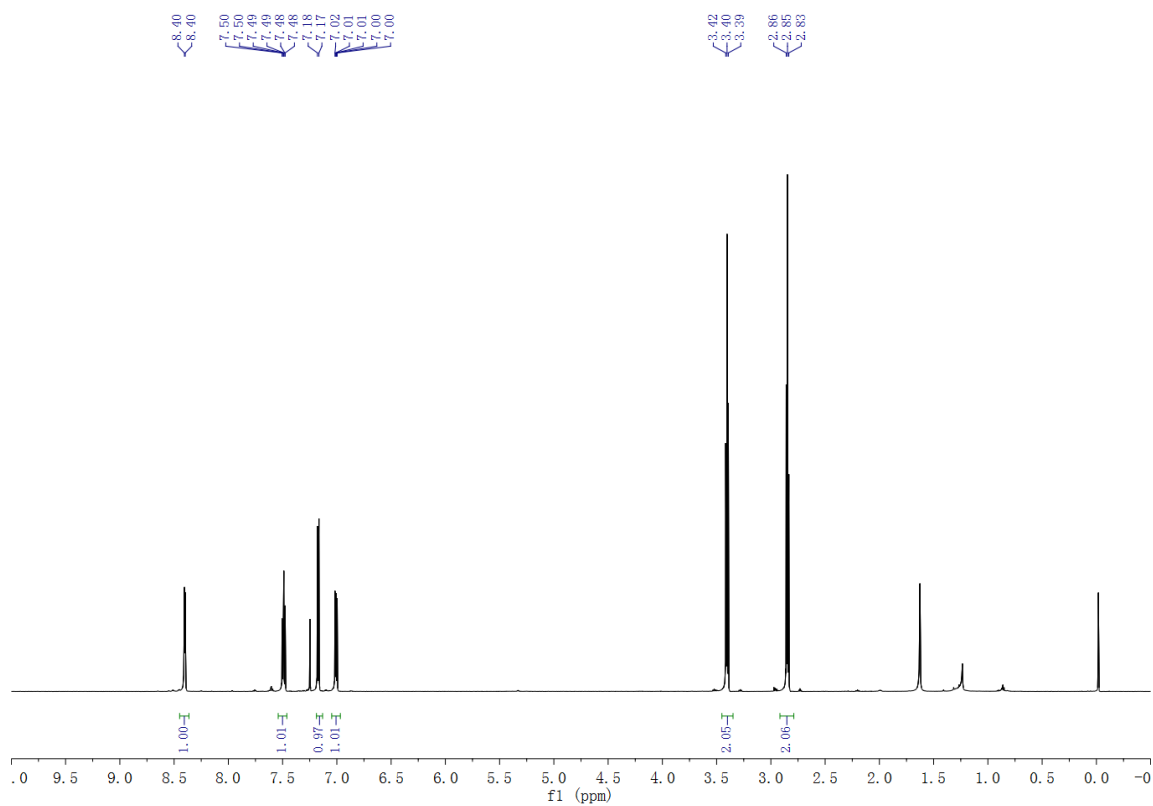

$^{13}\text{C}$  NMR ( $\text{CDCl}_3$ , 150 M Hz)

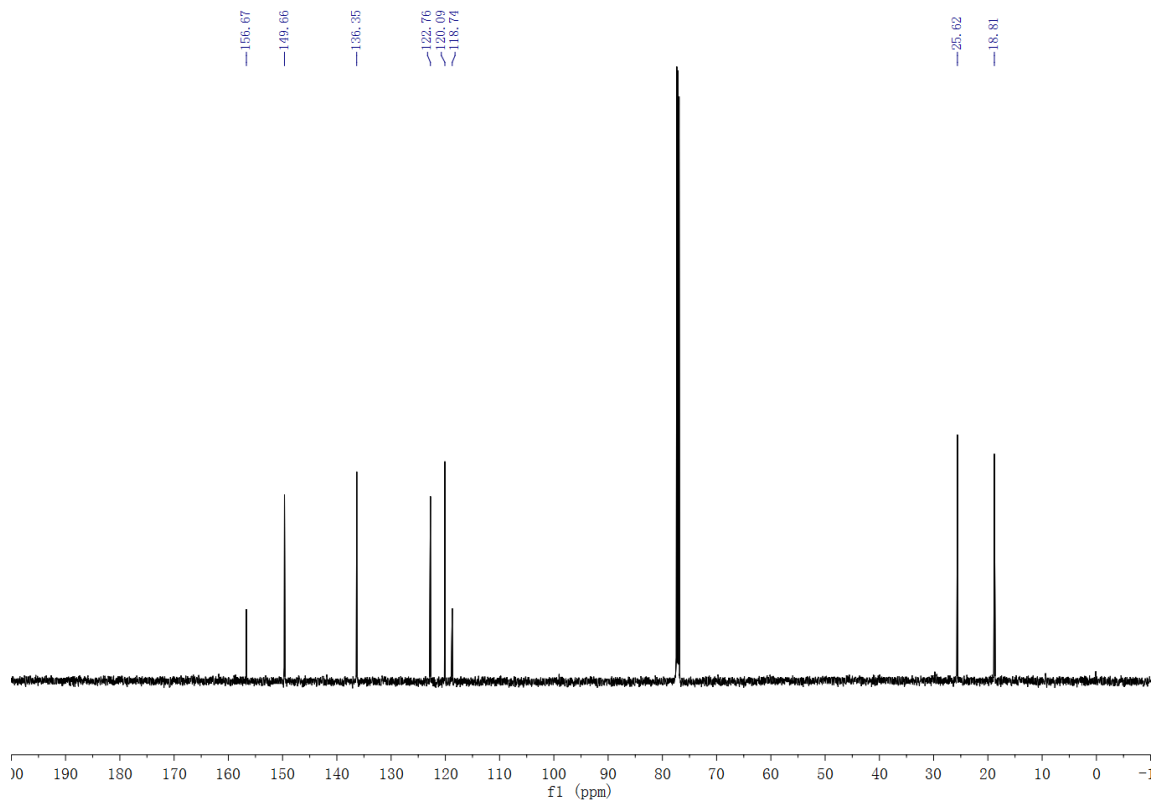

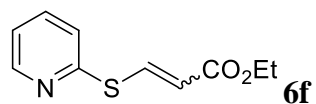

<sup>1</sup>H NMR (CDCl<sub>3</sub>, 600 M Hz)

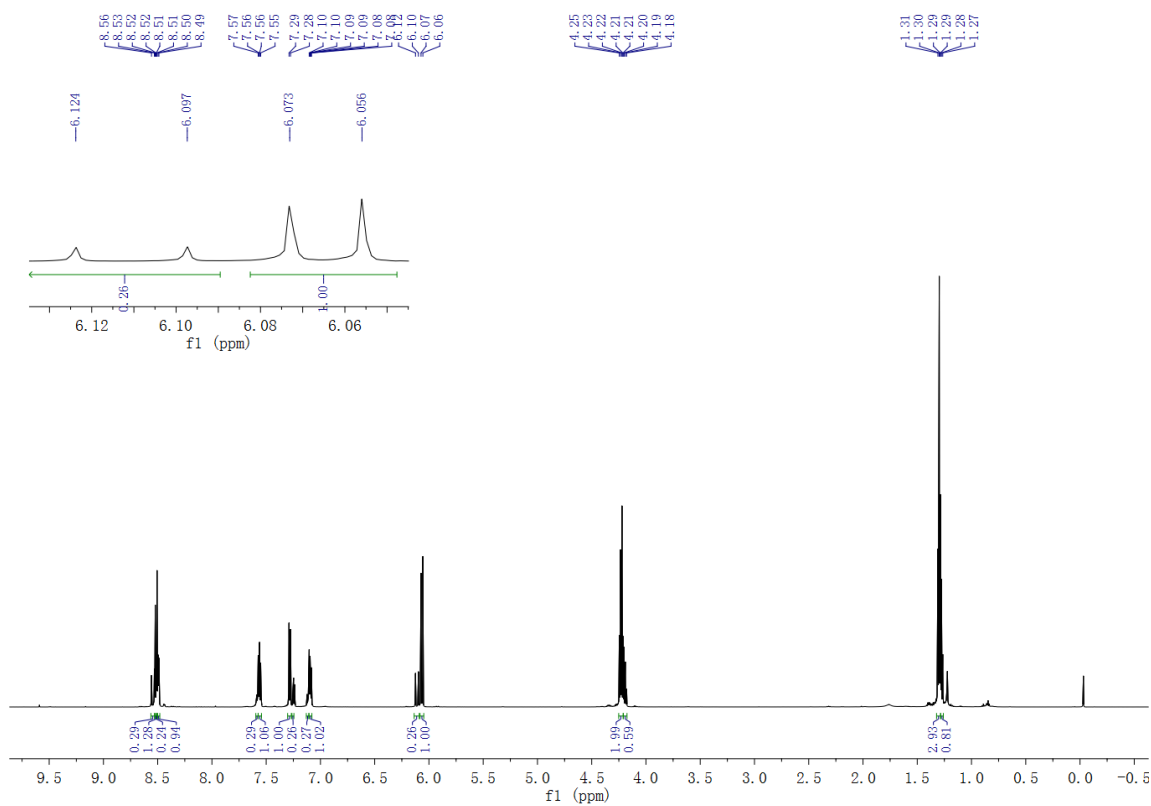

<sup>13</sup>C NMR (CDCl<sub>3</sub>, 150 M Hz)

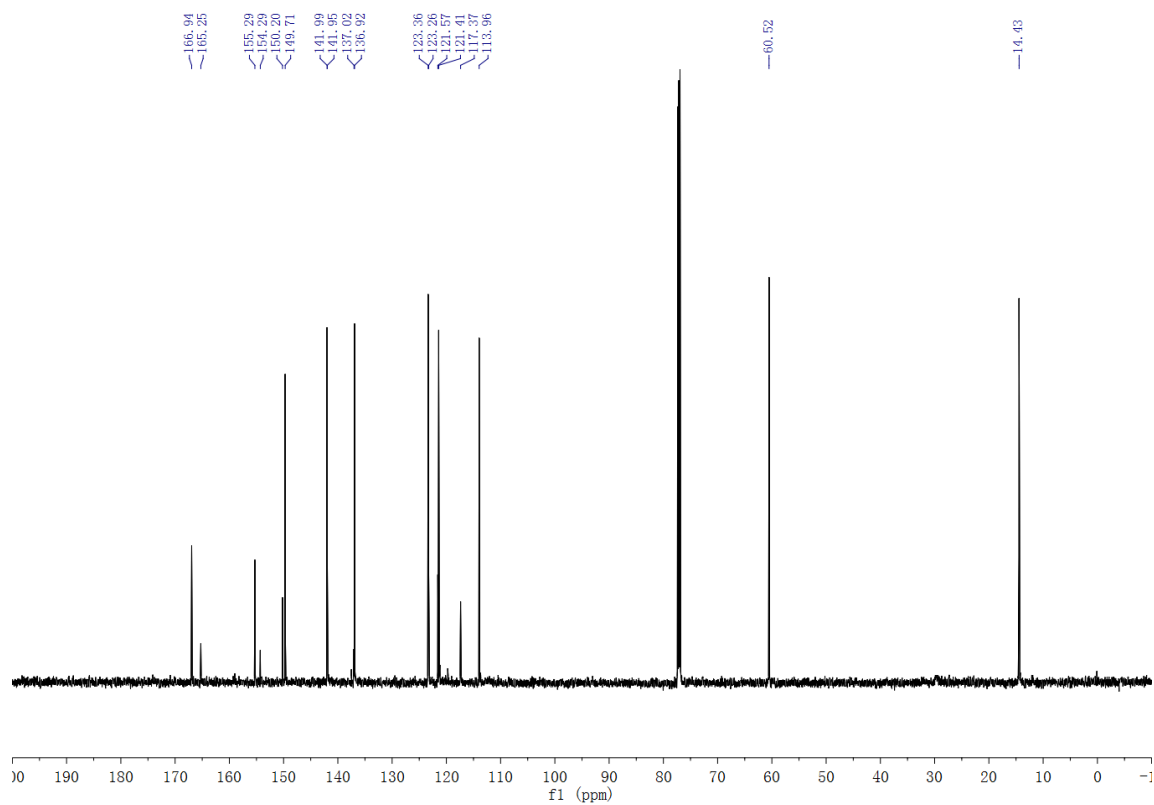

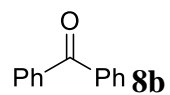

$^1\text{H}$  NMR ( $\text{CDCl}_3$ , 600 M Hz)

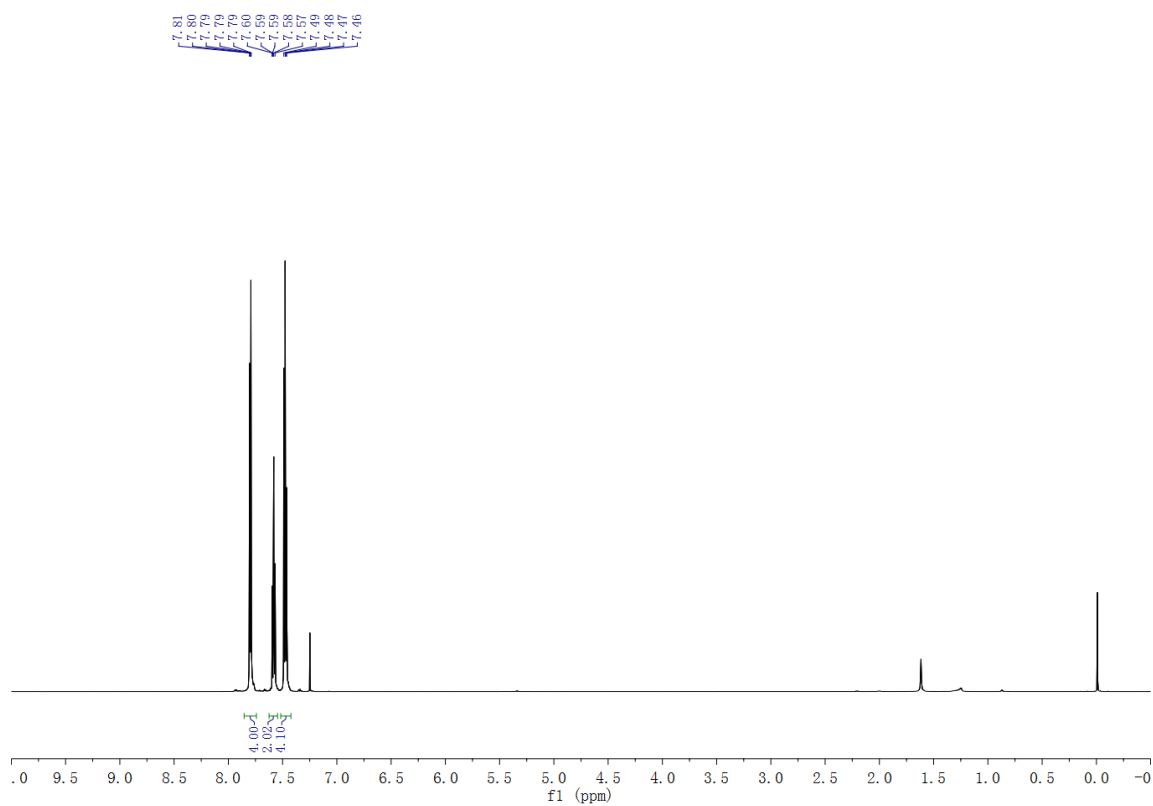

$^{13}\text{C}$  NMR ( $\text{CDCl}_3$ , 150 M Hz)

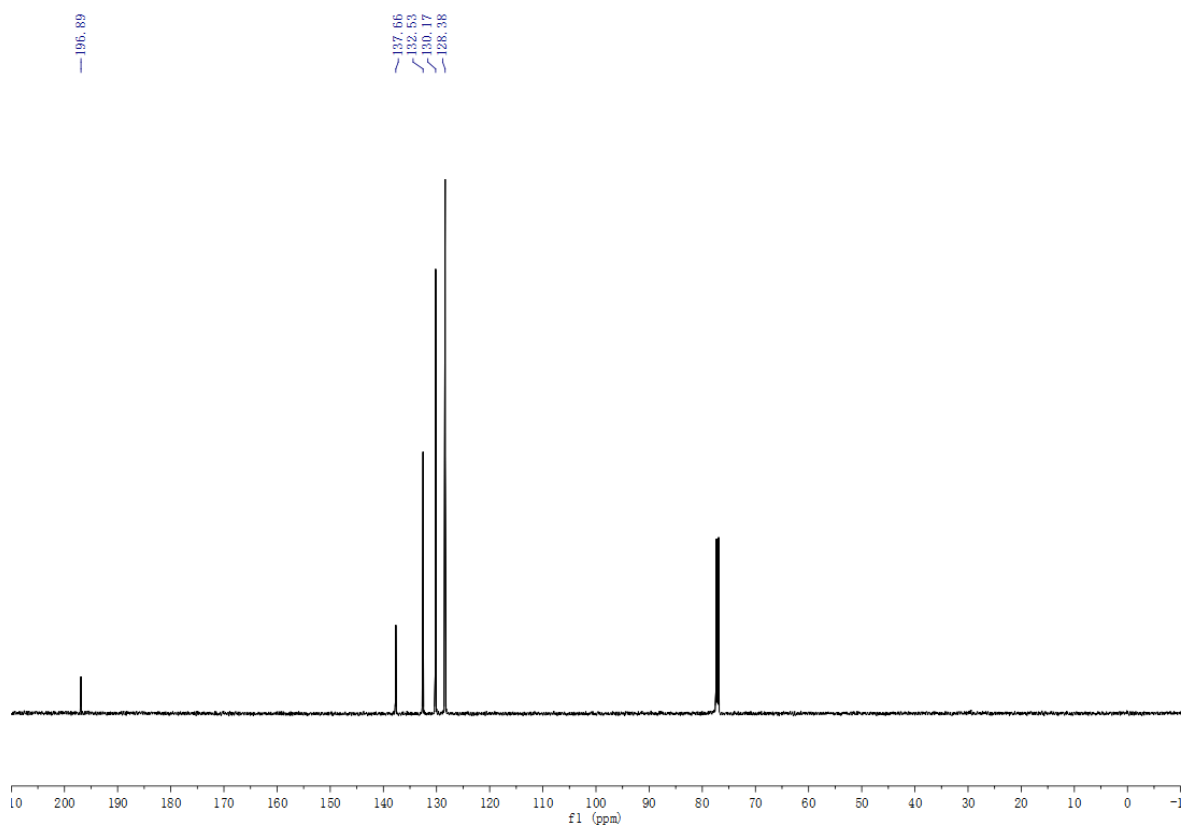

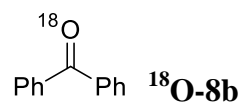

<sup>1</sup>H NMR (CDCl<sub>3</sub>, 600 M Hz)

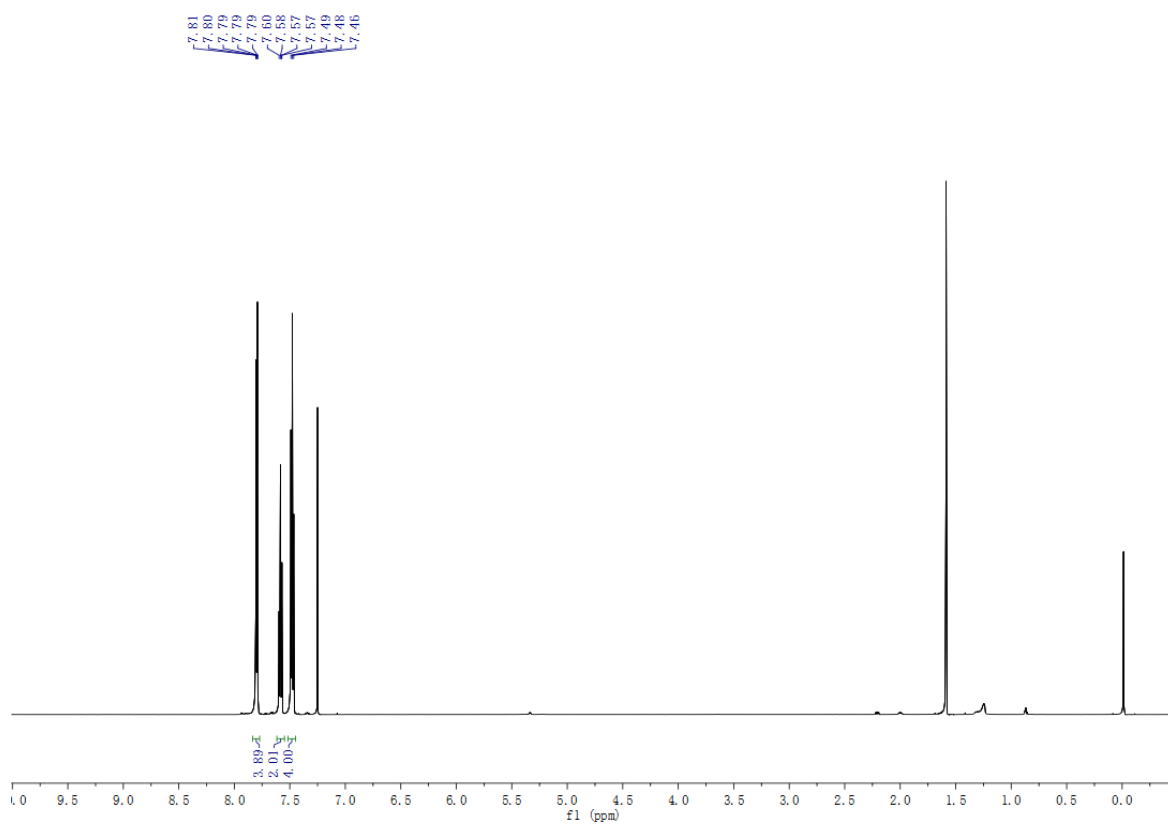

<sup>13</sup>C NMR (CDCl<sub>3</sub>, 150 M Hz)

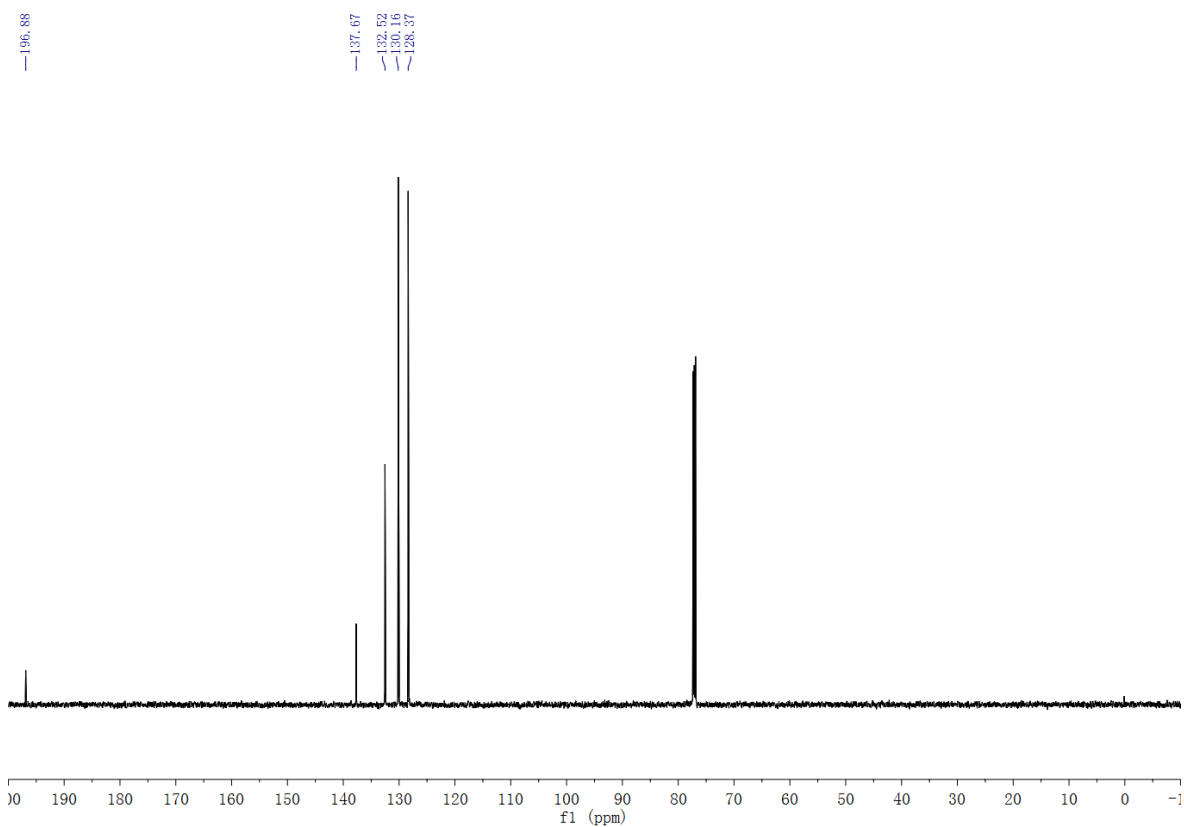

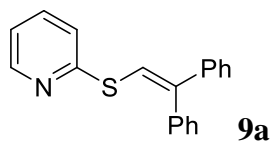

$^1\text{H NMR}$  ( $\text{CDCl}_3$ , 600 M Hz)

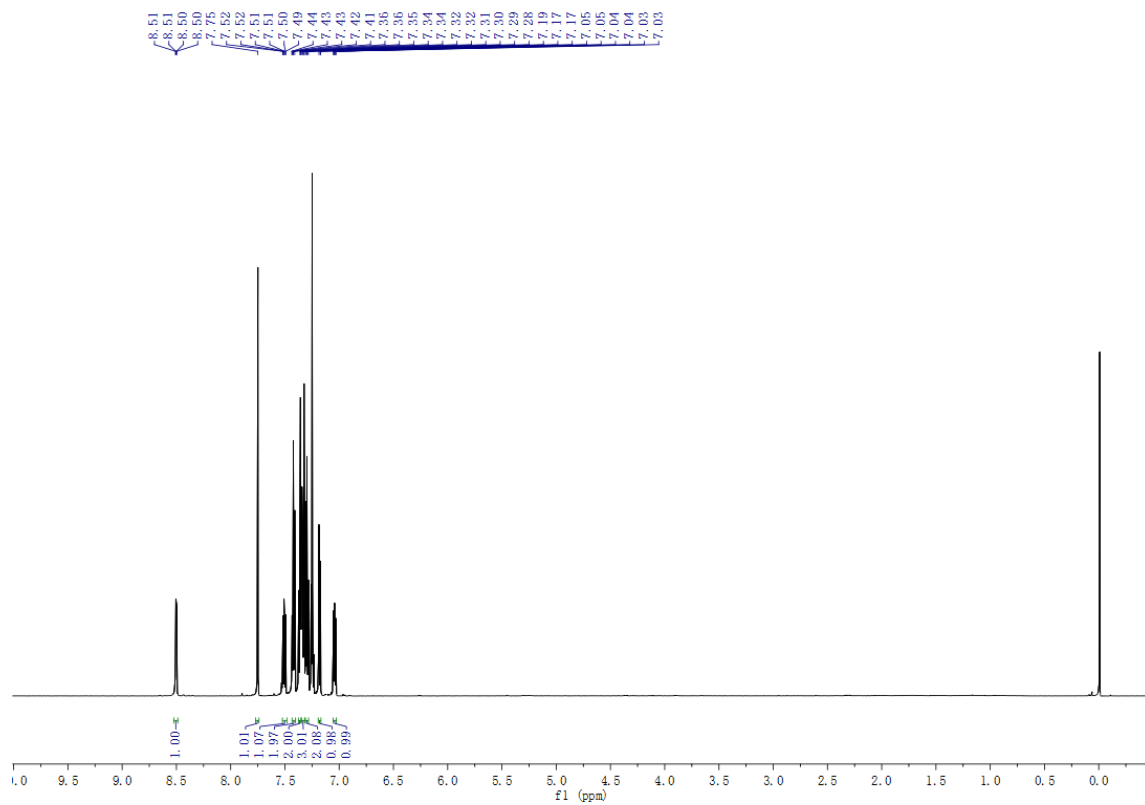

$^{13}\text{C NMR}$  ( $\text{CDCl}_3$ , 150 M Hz)

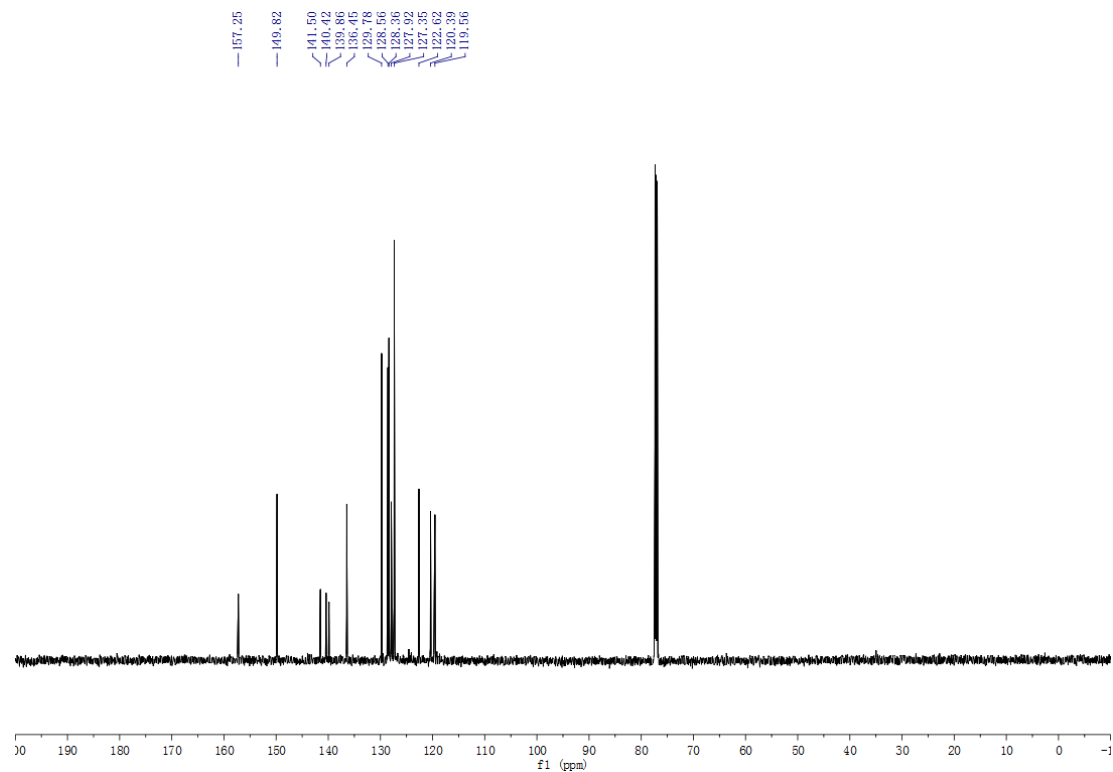

Supplement: d2qo00169a1.pdf [file d2qo00169a1.pdf]
